# Supplementary material for: Analysis of pancreatic extracellular matrix protein post-translational modifications via electrostatic repulsion-hydrophilic interaction chromatography coupled with mass spectrometry
Source: Royal Society of Chemistry journal article supplement (doi:10.1039/d1mo00104c), 2021-07-16
Supplement: d1mo00104c1.xlsx [file d1mo00104c1.xlsx]

## Sheet: Proteins
UniProt	Name	ECM?	ECM Role	Glyco?	Phospho?
P04118	Colipase	0	0	0	0
P01308	Insulin [Cleaved into: Insulin B chain; Insulin A chain]	Yes	Secreted factors	0	0
P15086	Carboxypeptidase B (EC 3.4.17.2) (Pancreas-specific protein) (PASP)	0	0	0	0
P04075	Fructose-bisphosphate aldolase A (EC 4.1.2.13) (Lung cancer antigen NY-LU-1) (Muscle-type aldolase)	0	0	0	0
P68871	Hemoglobin subunit beta (Beta-globin) (Hemoglobin beta chain) [Cleaved into: LVV-hemorphin-7; Spinorphin]	0	0	0	0
P29966	Myristoylated alanine-rich C-kinase substrate (MARCKS) (Protein kinase C substrate, 80 kDa protein, light chain) (80K-L protein) (PKCSL)	0	0	0	Yes
P14174	Macrophage migration inhibitory factor (MIF) (EC 5.3.2.1) (Glycosylation-inhibiting factor) (GIF) (L-dopachrome isomerase) (L-dopachrome tautomerase) (EC 5.3.3.12) (Phenylpyruvate tautomerase)	0	0	0	0
P04792	Heat shock protein beta-1 (HspB1) (28 kDa heat shock protein) (Estrogen-regulated 24 kDa protein) (Heat shock 27 kDa protein) (HSP 27) (Stress-responsive protein 27) (SRP27)	0	0	0	Yes
Q6UX06	Olfactomedin-4 (OLM4) (Antiapoptotic protein GW112) (G-CSF-stimulated clone 1 protein) (hGC-1) (hOLfD)	0	0	Yes	0
P08727	Keratin, type I cytoskeletal 19 (Cytokeratin-19) (CK-19) (Keratin-19) (K19)	0	0	0	Yes
P05783	Keratin, type I cytoskeletal 18 (Cell proliferation-inducing gene 46 protein) (Cytokeratin-18) (CK-18) (Keratin-18) (K18)	0	0	0	Yes
P22626	Heterogeneous nuclear ribonucleoproteins A2/B1 (hnRNP A2/B1)	0	0	0	0
P68363	Tubulin alpha-1B chain (Alpha-tubulin ubiquitous) (Tubulin K-alpha-1) (Tubulin alpha-ubiquitous chain) [Cleaved into: Detyrosinated tubulin alpha-1B chain]	0	0	0	0
P09525	Annexin A4 (35-beta calcimedin) (Annexin IV) (Annexin-4) (Carbohydrate-binding protein p33/p41) (Chromobindin-4) (Endonexin I) (Lipocortin IV) (P32.5) (PP4-X) (Placental anticoagulant protein II) (PAP-II) (Protein II)	Yes	ECM-affiliated proteins	0	0
P05787	Keratin, type II cytoskeletal 8 (Cytokeratin-8) (CK-8) (Keratin-8) (K8) (Type-II keratin Kb8)	0	0	Yes	Yes
P40926	Malate dehydrogenase, mitochondrial (EC 1.1.1.37)	0	0	0	0
P27797	Calreticulin (CRP55) (Calregulin) (Endoplasmic reticulum resident protein 60) (ERp60) (HACBP) (grp60)	0	0	0	0
P63244	Receptor of activated protein C kinase 1 (Cell proliferation-inducing gene 21 protein) (Guanine nucleotide-binding protein subunit beta-2-like 1) (Guanine nucleotide-binding protein subunit beta-like protein 12.3) (Human lung cancer oncogene 7 protein) (HLC-7) (Receptor for activated C kinase) (Small ribosomal subunit protein RACK1) [Cleaved into: Receptor of activated protein C kinase 1, N-termi…	0	0	0	0
P07998	Ribonuclease pancreatic (EC 4.6.1.18) (HP-RNase) (RIB-1) (RNase UpI-1) (Ribonuclease 1) (RNase 1) (Ribonuclease A) (RNase A)	0	0	Yes	0
P08670	Vimentin	0	0	Yes	Yes
P30046	D-dopachrome decarboxylase (EC 4.1.1.84) (D-dopachrome tautomerase) (Phenylpyruvate tautomerase II)	0	0	0	0
Q96I15	Selenocysteine lyase (hSCL) (EC 4.4.1.16)	0	0	0	0
P60660	Myosin light polypeptide 6 (17 kDa myosin light chain) (LC17) (Myosin light chain 3) (MLC-3) (Myosin light chain alkali 3) (Myosin light chain A3) (Smooth muscle and nonmuscle myosin light chain alkali 6)	0	0	Yes	0
P69905	Hemoglobin subunit alpha (Alpha-globin) (Hemoglobin alpha chain)	0	0	0	0
P50440	Glycine amidinotransferase, mitochondrial (EC 2.1.4.1) (L-arginine:glycine amidinotransferase) (Transamidinase)	0	0	0	0
P01834	Immunoglobulin kappa constant (Ig kappa chain C region) (Ig kappa chain C region AG) (Ig kappa chain C region CUM) (Ig kappa chain C region EU) (Ig kappa chain C region OU) (Ig kappa chain C region ROY) (Ig kappa chain C region TI)	0	0	0	0
P07237	Protein disulfide-isomerase (PDI) (EC 5.3.4.1) (Cellular thyroid hormone-binding protein) (Prolyl 4-hydroxylase subunit beta) (p55)	0	0	0	0
P02545	Prelamin-A/C [Cleaved into: Lamin-A/C (70 kDa lamin) (Renal carcinoma antigen NY-REN-32)]	0	0	0	Yes
P62829	60S ribosomal protein L23 (60S ribosomal protein L17) (Large ribosomal subunit protein uL14)	0	0	0	0
P07477	Trypsin-1 (EC 3.4.21.4) (Beta-trypsin) (Cationic trypsinogen) (Serine protease 1) (Trypsin I) [Cleaved into: Alpha-trypsin chain 1; Alpha-trypsin chain 2]	Yes	ECM regulators	0	Yes
P09093	Chymotrypsin-like elastase family member 3A (EC 3.4.21.70) (Elastase IIIA) (Elastase-3A) (Protease E)	Yes	ECM regulators	Yes	0
P07355	Annexin A2 (Annexin II) (Annexin-2) (Calpactin I heavy chain) (Calpactin-1 heavy chain) (Chromobindin-8) (Lipocortin II) (Placental anticoagulant protein IV) (PAP-IV) (Protein I) (p36)	Yes	ECM-affiliated proteins	0	0
P06702	Protein S100-A9 (Calgranulin-B) (Calprotectin L1H subunit) (Leukocyte L1 complex heavy chain) (Migration inhibitory factor-related protein 14) (MRP-14) (p14) (S100 calcium-binding protein A9)	Yes	Secreted factors	0	0
P07919	Cytochrome b-c1 complex subunit 6, mitochondrial (Complex III subunit 6) (Complex III subunit VIII) (Cytochrome c1 non-heme 11 kDa protein) (Mitochondrial hinge protein) (Ubiquinol-cytochrome c reductase complex 11 kDa protein)	0	0	0	0
P54317	Pancreatic lipase-related protein 2 (PL-RP2) (Cytotoxic T lymphocyte lipase) (Galactolipase) (EC 3.1.1.26) (Triacylglycerol lipase) (EC 3.1.1.3)	0	0	Yes	0
P08217	Chymotrypsin-like elastase family member 2A (EC 3.4.21.71) (Elastase-2A)	Yes	ECM regulators	0	0
P04406	Glyceraldehyde-3-phosphate dehydrogenase (GAPDH) (EC 1.2.1.12) (Peptidyl-cysteine S-nitrosylase GAPDH) (EC 2.6.99.-)	0	0	Yes	0
P31949	Protein S100-A11 (Calgizzarin) (Metastatic lymph node gene 70 protein) (MLN 70) (Protein S100-C) (S100 calcium-binding protein A11) [Cleaved into: Protein S100-A11, N-terminally processed]	Yes	Secreted factors	0	0
P61106	Ras-related protein Rab-14	0	0	0	0
Q9P0L0	Vesicle-associated membrane protein-associated protein A (VAMP-A) (VAMP-associated protein A) (VAP-A) (33 kDa VAMP-associated protein) (VAP-33)	0	0	0	0
Q01995	Transgelin (22 kDa actin-binding protein) (Protein WS3-10) (Smooth muscle protein 22-alpha) (SM22-alpha)	0	0	0	0
P80723	Brain acid soluble protein 1 (22 kDa neuronal tissue-enriched acidic protein) (Neuronal axonal membrane protein NAP-22)	0	0	0	0
P68371	Tubulin beta-4B chain (Tubulin beta-2 chain) (Tubulin beta-2C chain)	0	0	0	0
P00558	Phosphoglycerate kinase 1 (EC 2.7.2.3) (Cell migration-inducing gene 10 protein) (Primer recognition protein 2) (PRP 2)	0	0	0	0
P05388	60S acidic ribosomal protein P0 (60S ribosomal protein L10E) (Large ribosomal subunit protein uL10)	0	0	0	0
P30086	Phosphatidylethanolamine-binding protein 1 (PEBP-1) (HCNPpp) (Neuropolypeptide h3) (Prostatic-binding protein) (Raf kinase inhibitor protein) (RKIP) [Cleaved into: Hippocampal cholinergic neurostimulating peptide (HCNP)]	0	0	0	0
O75947	ATP synthase subunit d, mitochondrial (ATPase subunit d) (ATP synthase peripheral stalk subunit d)	0	0	0	0
P10809	60 kDa heat shock protein, mitochondrial (EC 5.6.1.7) (60 kDa chaperonin) (Chaperonin 60) (CPN60) (Heat shock protein 60) (HSP-60) (Hsp60) (HuCHA60) (Mitochondrial matrix protein P1) (P60 lymphocyte protein)	0	0	0	0
P00325	All-trans-retinol dehydrogenase [NAD(+)] ADH1B (EC 1.1.1.105) (Alcohol dehydrogenase 1B) (Alcohol dehydrogenase subunit beta)	0	0	0	0
P40313	Chymotrypsin-like protease CTRL-1 (EC 3.4.21.-)	0	0	Yes	0
P17538	Chymotrypsinogen B (EC 3.4.21.1) [Cleaved into: Chymotrypsin B chain A; Chymotrypsin B chain B; Chymotrypsin B chain C]	0	0	0	0
P67809	Y-box-binding protein 1 (YB-1) (CCAAT-binding transcription factor I subunit A) (CBF-A) (DNA-binding protein B) (DBPB) (Enhancer factor I subunit A) (EFI-A) (Nuclease-sensitive element-binding protein 1) (Y-box transcription factor)	0	0	0	Yes
P30101	Protein disulfide-isomerase A3 (EC 5.3.4.1) (58 kDa glucose-regulated protein) (58 kDa microsomal protein) (p58) (Disulfide isomerase ER-60) (Endoplasmic reticulum resident protein 57) (ER protein 57) (ERp57) (Endoplasmic reticulum resident protein 60) (ER protein 60) (ERp60)	0	0	0	0
P29401	Transketolase (TK) (EC 2.2.1.1)	0	0	0	0
P21796	Voltage-dependent anion-selective channel protein 1 (VDAC-1) (hVDAC1) (Outer mitochondrial membrane protein porin 1) (Plasmalemmal porin) (Porin 31HL) (Porin 31HM)	0	0	0	0
P02794	Ferritin heavy chain (Ferritin H subunit) (EC 1.16.3.1) (Cell proliferation-inducing gene 15 protein) [Cleaved into: Ferritin heavy chain, N-terminally processed]	0	0	0	Yes
P46783	40S ribosomal protein S10 (Small ribosomal subunit protein eS10)	0	0	0	0
P62937	Peptidyl-prolyl cis-trans isomerase A (PPIase A) (EC 5.2.1.8) (Cyclophilin A) (Cyclosporin A-binding protein) (Rotamase A) [Cleaved into: Peptidyl-prolyl cis-trans isomerase A, N-terminally processed]	0	0	0	0
Q6GPI1	Chymotrypsinogen B2 (EC 3.4.21.1) [Cleaved into: Chymotrypsin B2 chain A; Chymotrypsin B2 chain B; Chymotrypsin B2 chain C]	0	0	Yes	0
P16233	Pancreatic triacylglycerol lipase (PL) (PTL) (Pancreatic lipase) (EC 3.1.1.3)	0	0	Yes	0
P05162	Galectin-2 (Gal-2) (Beta-galactoside-binding lectin L-14-II) (HL14) (Lactose-binding lectin 2) (S-Lac lectin 2)	Yes	ECM-affiliated proteins	0	0
P24844	Myosin regulatory light polypeptide 9 (20 kDa myosin light chain) (LC20) (MLC-2C) (Myosin RLC) (Myosin regulatory light chain 2, smooth muscle isoform) (Myosin regulatory light chain 9) (Myosin regulatory light chain MRLC1)	0	0	0	0
P51858	Hepatoma-derived growth factor (HDGF) (High mobility group protein 1-like 2) (HMG-1L2)	0	0	0	Yes
P04054	Phospholipase A2 (EC 3.1.1.4) (Group IB phospholipase A2) (Phosphatidylcholine 2-acylhydrolase 1B)	0	0	0	0
P12109	Collagen alpha-1(VI) chain	Yes	Collagens	Yes	0
P11142	Heat shock cognate 71 kDa protein (EC 3.6.4.10) (Heat shock 70 kDa protein 8) (Lipopolysaccharide-associated protein 1) (LAP-1) (LPS-associated protein 1)	0	0	0	0
P24752	Acetyl-CoA acetyltransferase, mitochondrial (EC 2.3.1.9) (Acetoacetyl-CoA thiolase) (T2)	0	0	0	0
P62258	14-3-3 protein epsilon (14-3-3E)	0	0	0	0
P42765	3-ketoacyl-CoA thiolase, mitochondrial (EC 2.3.1.16) (Acetyl-CoA acetyltransferase) (EC 2.3.1.9) (Acetyl-CoA acyltransferase) (Acyl-CoA hydrolase, mitochondrial) (EC 3.1.2.-) (EC 3.1.2.1) (EC 3.1.2.2) (Beta-ketothiolase) (Mitochondrial 3-oxoacyl-CoA thiolase) (T1)	0	0	0	0
P02679	Fibrinogen gamma chain	Yes	ECM glycoproteins	Yes	0
O75506	Heat shock factor-binding protein 1 (Nasopharyngeal carcinoma-associated antigen 13) (NPC-A-13)	0	0	0	0
P29692	Elongation factor 1-delta (EF-1-delta) (Antigen NY-CO-4)	0	0	0	Yes
P23396	40S ribosomal protein S3 (EC 4.2.99.18) (Small ribosomal subunit protein uS3)	0	0	0	Yes
P09382	Galectin-1 (Gal-1) (14 kDa laminin-binding protein) (HLBP14) (14 kDa lectin) (Beta-galactoside-binding lectin L-14-I) (Galaptin) (HBL) (HPL) (Lactose-binding lectin 1) (Lectin galactoside-binding soluble 1) (Putative MAPK-activating protein PM12) (S-Lac lectin 1)	Yes	ECM-affiliated proteins	0	0
P02675	Fibrinogen beta chain [Cleaved into: Fibrinopeptide B; Fibrinogen beta chain]	Yes	ECM glycoproteins	Yes	0
P63261	Actin, cytoplasmic 2 (Gamma-actin) [Cleaved into: Actin, cytoplasmic 2, N-terminally processed]	0	0	0	0
Q13087	Protein disulfide-isomerase A2 (EC 5.3.4.1) (Pancreas-specific protein disulfide isomerase) (PDIp)	0	0	Yes	0
P14625	Endoplasmin (94 kDa glucose-regulated protein) (GRP-94) (Heat shock protein 90 kDa beta member 1) (Tumor rejection antigen 1) (gp96 homolog)	0	0	Yes	0
Q9Y333	U6 snRNA-associated Sm-like protein LSm2 (Protein G7b) (Small nuclear ribonuclear protein D homolog) (snRNP core Sm-like protein Sm-x5)	0	0	0	0
O75531	Barrier-to-autointegration factor (Breakpoint cluster region protein 1) [Cleaved into: Barrier-to-autointegration factor, N-terminally processed]	0	0	0	0
P30041	Peroxiredoxin-6 (EC 1.11.1.27) (1-Cys peroxiredoxin) (1-Cys PRX) (24 kDa protein) (Acidic calcium-independent phospholipase A2) (aiPLA2) (EC 3.1.1.4) (Antioxidant protein 2) (Glutathione-dependent peroxiredoxin) (Liver 2D page spot 40) (Lysophosphatidylcholine acyltransferase 5) (LPC acyltransferase 5) (LPCAT-5) (Lyso-PC acyltransferase 5) (EC 2.3.1.23) (Non-selenium glutathione peroxidase) (NSGP…	0	0	0	0
Q9P2E9	Ribosome-binding protein 1 (180 kDa ribosome receptor homolog) (RRp) (ES/130-related protein) (Ribosome receptor protein)	0	0	0	Yes
P07585	Decorin (Bone proteoglycan II) (PG-S2) (PG40)	Yes	Proteoglycans	Yes	0
P19105	Myosin regulatory light chain 12A (Epididymis secretory protein Li 24) (HEL-S-24) (MLC-2B) (Myosin RLC) (Myosin regulatory light chain 2, nonsarcomeric) (Myosin regulatory light chain MRLC3)	0	0	0	0
P48735	Isocitrate dehydrogenase [NADP], mitochondrial (IDH) (EC 1.1.1.42) (ICD-M) (IDP) (NADP(+)-specific ICDH) (Oxalosuccinate decarboxylase)	0	0	0	0
P21333	Filamin-A (FLN-A) (Actin-binding protein 280) (ABP-280) (Alpha-filamin) (Endothelial actin-binding protein) (Filamin-1) (Non-muscle filamin)	0	0	Yes	Yes
P98160	Basement membrane-specific heparan sulfate proteoglycan core protein (HSPG) (Perlecan) (PLC) [Cleaved into: Endorepellin; LG3 peptide]	Yes	Proteoglycans	Yes	0
P55072	Transitional endoplasmic reticulum ATPase (TER ATPase) (EC 3.6.4.6) (15S Mg(2+)-ATPase p97 subunit) (Valosin-containing protein) (VCP)	0	0	0	0
Q03252	Lamin-B2	0	0	0	0
P50990	T-complex protein 1 subunit theta (TCP-1-theta) (CCT-theta) (Chaperonin containing T-complex polypeptide 1 subunit 8) (Renal carcinoma antigen NY-REN-15)	0	0	0	0
P58876	Histone H2B type 1-D (H2B-clustered histone 5) (HIRA-interacting protein 2) (Histone H2B.1 B) (Histone H2B.b) (H2B/b)	0	0	0	0
P13639	Elongation factor 2 (EF-2)	0	0	0	0
P00352	Retinal dehydrogenase 1 (RALDH 1) (RalDH1) (EC 1.2.1.-) (EC 1.2.1.36) (ALDH-E1) (ALHDII) (Aldehyde dehydrogenase family 1 member A1) (Aldehyde dehydrogenase, cytosolic)	0	0	0	0
P05387	60S acidic ribosomal protein P2 (Large ribosomal subunit protein P2) (Renal carcinoma antigen NY-REN-44)	0	0	0	0
Q7KZF4	Staphylococcal nuclease domain-containing protein 1 (EC 3.1.31.1) (100 kDa coactivator) (EBNA2 coactivator p100) (Tudor domain-containing protein 11) (p100 co-activator)	0	0	0	Yes
P55083	Microfibril-associated glycoprotein 4	Yes	ECM glycoproteins	Yes	0
P63104	14-3-3 protein zeta/delta (Protein kinase C inhibitor protein 1) (KCIP-1)	0	0	0	0
P61247	40S ribosomal protein S3a (Small ribosomal subunit protein eS1) (v-fos transformation effector protein) (Fte-1)	0	0	0	0
Q99798	Aconitate hydratase, mitochondrial (Aconitase) (EC 4.2.1.3) (Citrate hydro-lyase)	0	0	0	0
P01275	Pro-glucagon [Cleaved into: Glicentin; Glicentin-related polypeptide (GRPP); Oxyntomodulin (OXM) (OXY); Glucagon; Glucagon-like peptide 1 (GLP-1) (Incretin hormone); Glucagon-like peptide 1(7-37) (GLP-1(7-37)); Glucagon-like peptide 1(7-36) (GLP-1(7-36)); Glucagon-like peptide 2 (GLP-2)]	0	0	0	0
P68104	Elongation factor 1-alpha 1 (EF-1-alpha-1) (Elongation factor Tu) (EF-Tu) (Eukaryotic elongation factor 1 A-1) (eEF1A-1) (Leukocyte receptor cluster member 7)	0	0	Yes	0
P04843	Dolichyl-diphosphooligosaccharide--protein glycosyltransferase subunit 1 (Dolichyl-diphosphooligosaccharide--protein glycosyltransferase 67 kDa subunit) (Ribophorin I) (RPN-I) (Ribophorin-1)	0	0	Yes	0
Q9UBI6	Guanine nucleotide-binding protein G(I)/G(S)/G(O) subunit gamma-12	0	0	0	0
P00387	NADH-cytochrome b5 reductase 3 (B5R) (Cytochrome b5 reductase) (EC 1.6.2.2) (Diaphorase-1) [Cleaved into: NADH-cytochrome b5 reductase 3 membrane-bound form; NADH-cytochrome b5 reductase 3 soluble form]	0	0	0	0
P04746	Pancreatic alpha-amylase (PA) (EC 3.2.1.1) (1,4-alpha-D-glucan glucanohydrolase)	0	0	Yes	0
P49411	Elongation factor Tu, mitochondrial (EF-Tu) (P43)	0	0	0	0
O75368	SH3 domain-binding glutamic acid-rich-like protein	0	0	0	0
P32969	60S ribosomal protein L9 (Large ribosomal subunit protein uL6)	0	0	Yes	0
P16444	Dipeptidase 1 (EC 3.4.13.19) (Beta-lactamase) (EC 3.5.2.6) (Dehydropeptidase-I) (Microsomal dipeptidase) (Renal dipeptidase) (hRDP)	0	0	Yes	0
P62873	Guanine nucleotide-binding protein G(I)/G(S)/G(T) subunit beta-1 (Transducin beta chain 1)	0	0	0	0
P62244	40S ribosomal protein S15a (Small ribosomal subunit protein uS8)	0	0	0	0
P06576	ATP synthase subunit beta, mitochondrial (EC 7.1.2.2) (ATP synthase F1 subunit beta)	0	0	0	0
Q02543	60S ribosomal protein L18a (Large ribosomal subunit protein eL20)	0	0	0	0
P00505	Aspartate aminotransferase, mitochondrial (mAspAT) (EC 2.6.1.1) (EC 2.6.1.7) (Fatty acid-binding protein) (FABP-1) (Glutamate oxaloacetate transaminase 2) (Kynurenine aminotransferase 4) (Kynurenine aminotransferase IV) (Kynurenine--oxoglutarate transaminase 4) (Kynurenine--oxoglutarate transaminase IV) (Plasma membrane-associated fatty acid-binding protein) (FABPpm) (Transaminase A)	0	0	0	0
Q9HCN8	Stromal cell-derived factor 2-like protein 1 (SDF2-like protein 1) (PWP1-interacting protein 8)	0	0	0	0
P19961	Alpha-amylase 2B (EC 3.2.1.1) (1,4-alpha-D-glucan glucanohydrolase 2B) (Carcinoid alpha-amylase)	0	0	Yes	0
P13667	Protein disulfide-isomerase A4 (EC 5.3.4.1) (Endoplasmic reticulum resident protein 70) (ER protein 70) (ERp70) (Endoplasmic reticulum resident protein 72) (ER protein 72) (ERp-72) (ERp72)	0	0	0	0
P49458	Signal recognition particle 9 kDa protein (SRP9)	0	0	0	0
O95182	NADH dehydrogenase [ubiquinone] 1 alpha subcomplex subunit 7 (Complex I-B14.5a) (CI-B14.5a) (NADH-ubiquinone oxidoreductase subunit B14.5a)	0	0	0	0
Q7Z4W1	L-xylulose reductase (XR) (EC 1.1.1.10) (Carbonyl reductase II) (Dicarbonyl/L-xylulose reductase) (Kidney dicarbonyl reductase) (kiDCR) (Short chain dehydrogenase/reductase family 20C member 1) (Sperm surface protein P34H)	0	0	0	0
O43678	NADH dehydrogenase [ubiquinone] 1 alpha subcomplex subunit 2 (Complex I-B8) (CI-B8) (NADH-ubiquinone oxidoreductase B8 subunit)	0	0	0	0
P09455	Retinol-binding protein 1 (Cellular retinol-binding protein) (CRBP) (Cellular retinol-binding protein I) (CRBP-I)	0	0	0	0
P24043	Laminin subunit alpha-2 (Laminin M chain) (Laminin-12 subunit alpha) (Laminin-2 subunit alpha) (Laminin-4 subunit alpha) (Merosin heavy chain)	Yes	ECM glycoproteins	Yes	0
P07099	Epoxide hydrolase 1 (EC 3.3.2.9) (Epoxide hydratase) (Microsomal epoxide hydrolase) (mEH)	0	0	0	0
O43707	Alpha-actinin-4 (Non-muscle alpha-actinin 4)	0	0	0	0
Q13162	Peroxiredoxin-4 (EC 1.11.1.24) (Antioxidant enzyme AOE372) (AOE37-2) (Peroxiredoxin IV) (Prx-IV) (Thioredoxin peroxidase AO372) (Thioredoxin-dependent peroxide reductase A0372) (Thioredoxin-dependent peroxiredoxin 4)	0	0	0	Yes
P26641	Elongation factor 1-gamma (EF-1-gamma) (eEF-1B gamma)	0	0	0	0
P08311	Cathepsin G (CG) (EC 3.4.21.20)	Yes	ECM regulators	Yes	0
P39019	40S ribosomal protein S19 (Small ribosomal subunit protein eS19)	0	0	0	0
P14618	Pyruvate kinase PKM (EC 2.7.1.40) (Cytosolic thyroid hormone-binding protein) (CTHBP) (Opa-interacting protein 3) (OIP-3) (Pyruvate kinase 2/3) (Pyruvate kinase muscle isozyme) (Thyroid hormone-binding protein 1) (THBP1) (Tumor M2-PK) (p58)	0	0	0	0
P02768	Albumin	0	0	0	0
P62263	40S ribosomal protein S14 (Small ribosomal subunit protein uS11)	0	0	0	0
Q99497	Parkinson disease protein 7 (Maillard deglycase) (Oncogene DJ1) (Parkinsonism-associated deglycase) (Protein DJ-1) (DJ-1) (Protein/nucleic acid deglycase DJ-1) (EC 3.1.2.-) (EC 3.5.1.-) (EC 3.5.1.124)	0	0	0	0
P48052	Carboxypeptidase A2 (EC 3.4.17.15)	0	0	0	0
P23946	Chymase (EC 3.4.21.39) (Alpha-chymase) (Mast cell protease I)	0	0	Yes	0
P05451	Lithostathine-1-alpha (Islet cells regeneration factor) (ICRF) (Islet of Langerhans regenerating protein) (REG) (Pancreatic stone protein) (PSP) (Pancreatic thread protein) (PTP) (Regenerating islet-derived protein 1-alpha) (REG-1-alpha) (Regenerating protein I alpha)	Yes	ECM-affiliated proteins	0	0
P20700	Lamin-B1	0	0	0	0
P02766	Transthyretin (ATTR) (Prealbumin) (TBPA)	0	0	0	0
P31937	3-hydroxyisobutyrate dehydrogenase, mitochondrial (HIBADH) (EC 1.1.1.31)	0	0	Yes	0
P07478	Trypsin-2 (EC 3.4.21.4) (Anionic trypsinogen) (Serine protease 2) (Trypsin II)	Yes	ECM regulators	0	Yes
Q16762	Thiosulfate sulfurtransferase (EC 2.8.1.1) (Rhodanese)	0	0	0	0
Q9NX40	OCIA domain-containing protein 1 (Ovarian cancer immunoreactive antigen domain containing 1) (Ovarian carcinoma immunoreactive antigen)	0	0	0	0
P01011	Alpha-1-antichymotrypsin (ACT) (Cell growth-inhibiting gene 24/25 protein) (Serpin A3) [Cleaved into: Alpha-1-antichymotrypsin His-Pro-less]	Yes	ECM regulators	Yes	0
P11047	Laminin subunit gamma-1 (Laminin B2 chain) (Laminin-1 subunit gamma) (Laminin-10 subunit gamma) (Laminin-11 subunit gamma) (Laminin-2 subunit gamma) (Laminin-3 subunit gamma) (Laminin-4 subunit gamma) (Laminin-6 subunit gamma) (Laminin-7 subunit gamma) (Laminin-8 subunit gamma) (Laminin-9 subunit gamma) (S-laminin subunit gamma) (S-LAM gamma)	Yes	ECM glycoproteins	Yes	0
O43175	D-3-phosphoglycerate dehydrogenase (3-PGDH) (EC 1.1.1.95) (2-oxoglutarate reductase) (EC 1.1.1.399) (Malate dehydrogenase) (EC 1.1.1.37)	0	0	0	0
P08133	Annexin A6 (67 kDa calelectrin) (Annexin VI) (Annexin-6) (Calphobindin-II) (CPB-II) (Chromobindin-20) (Lipocortin VI) (Protein III) (p68) (p70)	Yes	ECM-affiliated proteins	0	0
Q9UIJ7	GTP:AMP phosphotransferase AK3, mitochondrial (EC 2.7.4.10) (Adenylate kinase 3) (AK 3) (Adenylate kinase 3 alpha-like 1)	0	0	0	0
P06454	Prothymosin alpha [Cleaved into: Prothymosin alpha, N-terminally processed; Thymosin alpha-1]	0	0	0	0
P62888	60S ribosomal protein L30 (Large ribosomal subunit protein eL30)	0	0	0	0
P35579	Myosin-9 (Cellular myosin heavy chain, type A) (Myosin heavy chain 9) (Myosin heavy chain, non-muscle IIa) (Non-muscle myosin heavy chain A) (NMMHC-A) (Non-muscle myosin heavy chain IIa) (NMMHC II-a) (NMMHC-IIA)	0	0	Yes	Yes
P54920	Alpha-soluble NSF attachment protein (SNAP-alpha) (N-ethylmaleimide-sensitive factor attachment protein alpha)	0	0	0	0
P14854	Cytochrome c oxidase subunit 6B1 (Cytochrome c oxidase subunit VIb isoform 1) (COX VIb-1)	0	0	0	0
O43169	Cytochrome b5 type B (Cytochrome b5 outer mitochondrial membrane isoform)	0	0	0	0
Q12904	Aminoacyl tRNA synthase complex-interacting multifunctional protein 1 (Multisynthase complex auxiliary component p43) [Cleaved into: Endothelial monocyte-activating polypeptide 2 (EMAP-2) (Endothelial monocyte-activating polypeptide II) (EMAP-II) (Small inducible cytokine subfamily E member 1)]	0	0	0	0
P11021	Endoplasmic reticulum chaperone BiP (EC 3.6.4.10) (78 kDa glucose-regulated protein) (GRP-78) (Binding-immunoglobulin protein) (BiP) (Heat shock protein 70 family protein 5) (HSP70 family protein 5) (Heat shock protein family A member 5) (Immunoglobulin heavy chain-binding protein)	0	0	0	0
Q9GZT3	SRA stem-loop-interacting RNA-binding protein, mitochondrial	0	0	0	0
P60174	Triosephosphate isomerase (TIM) (EC 5.3.1.1) (Methylglyoxal synthase) (EC 4.2.3.3) (Triose-phosphate isomerase)	0	0	0	0
Q9Y6N5	Sulfide:quinone oxidoreductase, mitochondrial (SQOR) (EC 1.8.5.8) (Sulfide dehydrogenase-like) (Sulfide quinone oxidoreductase)	0	0	0	0
P16152	Carbonyl reductase [NADPH] 1 (EC 1.1.1.184) (15-hydroxyprostaglandin dehydrogenase [NADP(+)]) (EC 1.1.1.196) (EC 1.1.1.197) (20-beta-hydroxysteroid dehydrogenase) (NADPH-dependent carbonyl reductase 1) (Prostaglandin 9-ketoreductase) (PG-9-KR) (Prostaglandin-E(2) 9-reductase) (EC 1.1.1.189) (Short chain dehydrogenase/reductase family 21C member 1)	0	0	0	0
P23528	Cofilin-1 (18 kDa phosphoprotein) (p18) (Cofilin, non-muscle isoform)	0	0	0	0
Q08431	Lactadherin (Breast epithelial antigen BA46) (HMFG) (MFGM) (Milk fat globule-EGF factor 8) (MFG-E8) (SED1) [Cleaved into: Lactadherin short form; Medin]	Yes	ECM glycoproteins	Yes	0
P21912	Succinate dehydrogenase [ubiquinone] iron-sulfur subunit, mitochondrial (EC 1.3.5.1) (Iron-sulfur subunit of complex II) (Ip)	0	0	0	0
Q13813	Spectrin alpha chain, non-erythrocytic 1 (Alpha-II spectrin) (Fodrin alpha chain) (Spectrin, non-erythroid alpha subunit)	0	0	Yes	0
P04083	Annexin A1 (Annexin I) (Annexin-1) (Calpactin II) (Calpactin-2) (Chromobindin-9) (Lipocortin I) (Phospholipase A2 inhibitory protein) (p35)	Yes	ECM-affiliated proteins	0	0
Q16891	MICOS complex subunit MIC60 (Cell proliferation-inducing gene 4/52 protein) (Mitochondrial inner membrane protein) (Mitofilin) (p87/89)	0	0	0	0
Q96I99	Succinate--CoA ligase [GDP-forming] subunit beta, mitochondrial (EC 6.2.1.4) (GTP-specific succinyl-CoA synthetase subunit beta) (G-SCS) (GTPSCS) (Succinyl-CoA synthetase beta-G chain) (SCS-betaG)	0	0	0	0
P55268	Laminin subunit beta-2 (Laminin B1s chain) (Laminin-11 subunit beta) (Laminin-14 subunit beta) (Laminin-15 subunit beta) (Laminin-3 subunit beta) (Laminin-4 subunit beta) (Laminin-7 subunit beta) (Laminin-9 subunit beta) (S-laminin subunit beta) (S-LAM beta)	Yes	ECM glycoproteins	Yes	0
P51397	Death-associated protein 1 (DAP-1)	0	0	0	0
Q9UI09	NADH dehydrogenase [ubiquinone] 1 alpha subcomplex subunit 12 (13 kDa differentiation-associated protein) (Complex I-B17.2) (CI-B17.2) (CIB17.2) (NADH-ubiquinone oxidoreductase subunit B17.2)	0	0	0	0
O43399	Tumor protein D54 (hD54) (Tumor protein D52-like 2)	0	0	Yes	0
O75369	Filamin-B (FLN-B) (ABP-278) (ABP-280 homolog) (Actin-binding-like protein) (Beta-filamin) (Filamin homolog 1) (Fh1) (Filamin-3) (Thyroid autoantigen) (Truncated actin-binding protein) (Truncated ABP)	0	0	Yes	0
P06733	Alpha-enolase (EC 4.2.1.11) (2-phospho-D-glycerate hydro-lyase) (C-myc promoter-binding protein) (Enolase 1) (MBP-1) (MPB-1) (Non-neural enolase) (NNE) (Phosphopyruvate hydratase) (Plasminogen-binding protein)	0	0	0	0
Q12906	Interleukin enhancer-binding factor 3 (Double-stranded RNA-binding protein 76) (DRBP76) (M-phase phosphoprotein 4) (MPP4) (Nuclear factor associated with dsRNA) (NFAR) (Nuclear factor of activated T-cells 90 kDa) (NF-AT-90) (Translational control protein 80) (TCP80)	0	0	0	0
P02647	Apolipoprotein A-I (Apo-AI) (ApoA-I) (Apolipoprotein A1) [Cleaved into: Proapolipoprotein A-I (ProapoA-I); Truncated apolipoprotein A-I (Apolipoprotein A-I(1-242))]	0	0	0	0
P68032	Actin, alpha cardiac muscle 1 (Alpha-cardiac actin) [Cleaved into: Actin, alpha cardiac muscle 1, intermediate form]	0	0	0	0
P27824	Calnexin (IP90) (Major histocompatibility complex class I antigen-binding protein p88) (p90)	0	0	0	Yes
P14927	Cytochrome b-c1 complex subunit 7 (Complex III subunit 7) (Complex III subunit VII) (QP-C) (Ubiquinol-cytochrome c reductase complex 14 kDa protein)	0	0	0	0
P78371	T-complex protein 1 subunit beta (TCP-1-beta) (CCT-beta)	0	0	0	0
P62701	40S ribosomal protein S4, X isoform (SCR10) (Single copy abundant mRNA protein) (Small ribosomal subunit protein eS4)	0	0	0	0
P49748	Very long-chain specific acyl-CoA dehydrogenase, mitochondrial (VLCAD) (EC 1.3.8.9)	0	0	0	0
O14548	Cytochrome c oxidase subunit 7A-related protein, mitochondrial (COX7a-related protein) (Cytochrome c oxidase subunit VIIa-related protein) (EB1)	0	0	0	0
P10606	Cytochrome c oxidase subunit 5B, mitochondrial (Cytochrome c oxidase polypeptide Vb)	0	0	0	0
P07108	Acyl-CoA-binding protein (ACBP) (Diazepam-binding inhibitor) (DBI) (Endozepine) (EP)	0	0	0	0
Q01082	Spectrin beta chain, non-erythrocytic 1 (Beta-II spectrin) (Fodrin beta chain) (Spectrin, non-erythroid beta chain 1)	0	0	0	Yes
P62277	40S ribosomal protein S13 (Small ribosomal subunit protein uS15)	0	0	0	0
P02452	Collagen alpha-1(I) chain (Alpha-1 type I collagen)	Yes	Collagens	Yes	Yes
Q9Y4L1	Hypoxia up-regulated protein 1 (150 kDa oxygen-regulated protein) (ORP-150) (170 kDa glucose-regulated protein) (GRP-170)	0	0	Yes	0
P80404	4-aminobutyrate aminotransferase, mitochondrial (EC 2.6.1.19) ((S)-3-amino-2-methylpropionate transaminase) (EC 2.6.1.22) (GABA aminotransferase) (GABA-AT) (Gamma-amino-N-butyrate transaminase) (GABA transaminase) (GABA-T) (L-AIBAT)	0	0	0	0
Q13740	CD166 antigen (Activated leukocyte cell adhesion molecule) (CD antigen CD166)	0	0	Yes	0
P54819	Adenylate kinase 2, mitochondrial (AK 2) (EC 2.7.4.3) (ATP-AMP transphosphorylase 2) (ATP:AMP phosphotransferase) (Adenylate monophosphate kinase) [Cleaved into: Adenylate kinase 2, mitochondrial, N-terminally processed]	0	0	0	0
Q99714	3-hydroxyacyl-CoA dehydrogenase type-2 (EC 1.1.1.35) (17-beta-estradiol 17-dehydrogenase) (EC 1.1.1.62) (2-methyl-3-hydroxybutyryl-CoA dehydrogenase) (MHBD) (3-alpha-(17-beta)-hydroxysteroid dehydrogenase (NAD(+))) (EC 1.1.1.239) (3-hydroxy-2-methylbutyryl-CoA dehydrogenase) (EC 1.1.1.178) (3-hydroxyacyl-CoA dehydrogenase type II) (3alpha(or 20beta)-hydroxysteroid dehydrogenase) (EC 1.1.1.53) (7-…	0	0	0	0
P23284	Peptidyl-prolyl cis-trans isomerase B (PPIase B) (EC 5.2.1.8) (CYP-S1) (Cyclophilin B) (Rotamase B) (S-cyclophilin) (SCYLP)	0	0	0	0
P14868	Aspartate--tRNA ligase, cytoplasmic (EC 6.1.1.12) (Aspartyl-tRNA synthetase) (AspRS) (Cell proliferation-inducing gene 40 protein)	0	0	0	0
P38646	Stress-70 protein, mitochondrial (75 kDa glucose-regulated protein) (GRP-75) (Heat shock 70 kDa protein 9) (Mortalin) (MOT) (Peptide-binding protein 74) (PBP74)	0	0	Yes	0
Q9Y2Q3	Glutathione S-transferase kappa 1 (EC 2.5.1.18) (GST 13-13) (GST class-kappa) (GSTK1-1) (hGSTK1) (Glutathione S-transferase subunit 13)	0	0	0	0
P61960	Ubiquitin-fold modifier 1	0	0	0	0
Q99623	Prohibitin-2 (B-cell receptor-associated protein BAP37) (D-prohibitin) (Repressor of estrogen receptor activity)	0	0	0	0
O75367	Core histone macro-H2A.1 (Histone macroH2A1) (mH2A1) (Histone H2A.y) (H2A/y) (Medulloblastoma antigen MU-MB-50.205)	0	0	0	0
P07942	Laminin subunit beta-1 (Laminin B1 chain) (Laminin-1 subunit beta) (Laminin-10 subunit beta) (Laminin-12 subunit beta) (Laminin-2 subunit beta) (Laminin-6 subunit beta) (Laminin-8 subunit beta)	Yes	ECM glycoproteins	Yes	0
P50402	Emerin	0	0	0	0
P40939	Trifunctional enzyme subunit alpha, mitochondrial (78 kDa gastrin-binding protein) (Monolysocardiolipin acyltransferase) (EC 2.3.1.-) (TP-alpha) [Includes: Long-chain enoyl-CoA hydratase (EC 4.2.1.17); Long chain 3-hydroxyacyl-CoA dehydrogenase (EC 1.1.1.211)]	0	0	0	0
P00441	Superoxide dismutase [Cu-Zn] (EC 1.15.1.1) (Superoxide dismutase 1) (hSod1)	0	0	0	0
P62820	Ras-related protein Rab-1A (YPT1-related protein)	0	0	0	0
Q15181	Inorganic pyrophosphatase (EC 3.6.1.1) (Pyrophosphate phospho-hydrolase) (PPase)	0	0	0	0
P62249	40S ribosomal protein S16 (Small ribosomal subunit protein uS9)	0	0	0	0
P08708	40S ribosomal protein S17 (Small ribosomal subunit protein eS17)	0	0	0	0
P30039	Phenazine biosynthesis-like domain-containing protein (EC 5.1.-.-) (MAWD-binding protein) (MAWDBP) (Unknown protein 32 from 2D-page of liver tissue)	0	0	0	0
P61604	10 kDa heat shock protein, mitochondrial (Hsp10) (10 kDa chaperonin) (Chaperonin 10) (CPN10) (Early-pregnancy factor) (EPF)	0	0	0	0
P01861	Immunoglobulin heavy constant gamma 4 (Ig gamma-4 chain C region)	0	0	Yes	0
P51149	Ras-related protein Rab-7a	0	0	0	0
Q06830	Peroxiredoxin-1 (EC 1.11.1.24) (Natural killer cell-enhancing factor A) (NKEF-A) (Proliferation-associated gene protein) (PAG) (Thioredoxin peroxidase 2) (Thioredoxin-dependent peroxide reductase 2) (Thioredoxin-dependent peroxiredoxin 1)	0	0	0	0
Q09666	Neuroblast differentiation-associated protein AHNAK (Desmoyokin)	0	0	Yes	0
P60866	40S ribosomal protein S20 (Small ribosomal subunit protein uS10)	0	0	0	0
P51884	Lumican (Keratan sulfate proteoglycan lumican) (KSPG lumican)	Yes	Proteoglycans	Yes	0
O15230	Laminin subunit alpha-5 (Laminin-10 subunit alpha) (Laminin-11 subunit alpha) (Laminin-15 subunit alpha)	Yes	ECM glycoproteins	Yes	0
P13693	Translationally-controlled tumor protein (TCTP) (Fortilin) (Histamine-releasing factor) (HRF) (p23)	0	0	0	0
P63241	Eukaryotic translation initiation factor 5A-1 (eIF-5A-1) (eIF-5A1) (Eukaryotic initiation factor 5A isoform 1) (eIF-5A) (Rev-binding factor) (eIF-4D)	0	0	0	0
Q9Y3E5	Peptidyl-tRNA hydrolase 2, mitochondrial (PTH 2) (EC 3.1.1.29) (Bcl-2 inhibitor of transcription 1)	0	0	0	0
P21964	Catechol O-methyltransferase (EC 2.1.1.6)	0	0	0	0
P35244	Replication protein A 14 kDa subunit (RP-A p14) (Replication factor A protein 3) (RF-A protein 3)	0	0	0	0
P55769	NHP2-like protein 1 (High mobility group-like nuclear protein 2 homolog 1) (OTK27) (SNU13 homolog) (hSNU13) (U4/U6.U5 small nuclear ribonucleoprotein SNU13) (U4/U6.U5 tri-snRNP 15.5 kDa protein) [Cleaved into: NHP2-like protein 1, N-terminally processed]	0	0	0	0
P08861	Chymotrypsin-like elastase family member 3B (EC 3.4.21.70) (Elastase IIIB) (Elastase-3B) (Protease E)	Yes	ECM regulators	Yes	Yes
P22392	Nucleoside diphosphate kinase B (NDK B) (NDP kinase B) (EC 2.7.4.6) (C-myc purine-binding transcription factor PUF) (Histidine protein kinase NDKB) (EC 2.7.13.3) (nm23-H2)	0	0	0	0
Q13347	Eukaryotic translation initiation factor 3 subunit I (eIF3i) (Eukaryotic translation initiation factor 3 subunit 2) (TGF-beta receptor-interacting protein 1) (TRIP-1) (eIF-3-beta) (eIF3 p36)	0	0	0	0
Q15149	Plectin (PCN) (PLTN) (Hemidesmosomal protein 1) (HD1) (Plectin-1)	0	0	0	Yes
P02649	Apolipoprotein E (Apo-E)	0	0	0	0
P07910	Heterogeneous nuclear ribonucleoproteins C1/C2 (hnRNP C1/C2)	0	0	0	Yes
P08579	U2 small nuclear ribonucleoprotein B'' (U2 snRNP B'')	0	0	0	0
P18206	Vinculin (Metavinculin) (MV)	0	0	0	Yes
P51970	NADH dehydrogenase [ubiquinone] 1 alpha subcomplex subunit 8 (Complex I-19kD) (CI-19kD) (Complex I-PGIV) (CI-PGIV) (NADH-ubiquinone oxidoreductase 19 kDa subunit)	0	0	0	0
P09211	Glutathione S-transferase P (EC 2.5.1.18) (GST class-pi) (GSTP1-1)	0	0	0	Yes
P20674	Cytochrome c oxidase subunit 5A, mitochondrial (Cytochrome c oxidase polypeptide Va)	0	0	0	0
P84243	Histone H3.3	0	0	0	0
Q07065	Cytoskeleton-associated protein 4 (63-kDa cytoskeleton-linking membrane protein) (Climp-63) (p63)	0	0	0	0
P08294	Extracellular superoxide dismutase [Cu-Zn] (EC-SOD) (EC 1.15.1.1)	0	0	0	0
Q9UKM9	RNA-binding protein Raly (Autoantigen p542) (Heterogeneous nuclear ribonucleoprotein C-like 2) (hnRNP core protein C-like 2) (hnRNP associated with lethal yellow protein homolog)	0	0	Yes	Yes
P26038	Moesin (Membrane-organizing extension spike protein)	0	0	0	0
P27695	DNA-(apurinic or apyrimidinic site) endonuclease (EC 3.1.-.-) (APEX nuclease) (APEN) (Apurinic-apyrimidinic endonuclease 1) (AP endonuclease 1) (APE-1) (REF-1) (Redox factor-1) [Cleaved into: DNA-(apurinic or apyrimidinic site) endonuclease, mitochondrial]	0	0	0	0
Q9UQ80	Proliferation-associated protein 2G4 (Cell cycle protein p38-2G4 homolog) (hG4-1) (ErbB3-binding protein 1)	0	0	0	0
P61158	Actin-related protein 3 (Actin-like protein 3)	0	0	0	0
P0DOX5	Immunoglobulin gamma-1 heavy chain (Immunoglobulin gamma-1 heavy chain NIE)	0	0	Yes	0
P05109	Protein S100-A8 (Calgranulin-A) (Calprotectin L1L subunit) (Cystic fibrosis antigen) (CFAG) (Leukocyte L1 complex light chain) (Migration inhibitory factor-related protein 8) (MRP-8) (p8) (S100 calcium-binding protein A8) (Urinary stone protein band A)	Yes	Secreted factors	0	0
P30050	60S ribosomal protein L12 (Large ribosomal subunit protein uL11)	0	0	0	0
P25705	ATP synthase subunit alpha, mitochondrial (ATP synthase F1 subunit alpha)	0	0	0	0
P05198	Eukaryotic translation initiation factor 2 subunit 1 (Eukaryotic translation initiation factor 2 subunit alpha) (eIF-2-alpha) (eIF-2A) (eIF-2alpha)	0	0	0	0
Q9Y5J7	Mitochondrial import inner membrane translocase subunit Tim9	0	0	0	0
P49773	Histidine triad nucleotide-binding protein 1 (EC 3.-.-.-) (Adenosine 5'-monophosphoramidase) (Protein kinase C inhibitor 1) (Protein kinase C-interacting protein 1) (PKCI-1)	0	0	0	0
P46781	40S ribosomal protein S9 (Small ribosomal subunit protein uS4)	0	0	0	0
P05165	Propionyl-CoA carboxylase alpha chain, mitochondrial (PCCase subunit alpha) (EC 6.4.1.3) (Propanoyl-CoA:carbon dioxide ligase subunit alpha)	0	0	0	0
P35232	Prohibitin	0	0	0	0
Q08257	Quinone oxidoreductase (EC 1.6.5.5) (NADPH:quinone reductase) (Zeta-crystallin)	0	0	0	0
Q9Y4P3	Transducin beta-like protein 2 (WS beta-transducin repeats protein) (WS-betaTRP) (Williams-Beuren syndrome chromosomal region 13 protein)	0	0	Yes	0
P48047	ATP synthase subunit O, mitochondrial (ATP synthase peripheral stalk subunit OSCP) (Oligomycin sensitivity conferral protein) (OSCP)	0	0	0	0
P26885	Peptidyl-prolyl cis-trans isomerase FKBP2 (PPIase FKBP2) (EC 5.2.1.8) (13 kDa FK506-binding protein) (13 kDa FKBP) (FKBP-13) (FK506-binding protein 2) (FKBP-2) (Immunophilin FKBP13) (Rotamase)	0	0	0	0
P46777	60S ribosomal protein L5 (Large ribosomal subunit protein uL18)	0	0	0	0
P09488	Glutathione S-transferase Mu 1 (EC 2.5.1.18) (GST HB subunit 4) (GST class-mu 1) (GSTM1-1) (GSTM1a-1a) (GSTM1b-1b) (GTH4)	0	0	0	0
P15311	Ezrin (Cytovillin) (Villin-2) (p81)	0	0	Yes	0
Q9BX97	Plasmalemma vesicle-associated protein (Fenestrated endothelial-linked structure protein) (Plasmalemma vesicle protein 1) (PV-1)	0	0	Yes	0
P14866	Heterogeneous nuclear ribonucleoprotein L (hnRNP L)	0	0	Yes	0
Q9Y5M8	Signal recognition particle receptor subunit beta (SR-beta) (Protein APMCF1)	0	0	0	0
P21810	Biglycan (Bone/cartilage proteoglycan I) (PG-S1)	Yes	Proteoglycans	Yes	0
P62081	40S ribosomal protein S7 (Small ribosomal subunit protein eS7)	0	0	0	0
P61313	60S ribosomal protein L15 (Large ribosomal subunit protein eL15)	0	0	0	0
P12110	Collagen alpha-2(VI) chain	Yes	Collagens	Yes	0
P07737	Profilin-1 (Epididymis tissue protein Li 184a) (Profilin I)	0	0	Yes	0
O95292	Vesicle-associated membrane protein-associated protein B/C (VAMP-B/VAMP-C) (VAMP-associated protein B/C) (VAP-B/VAP-C)	0	0	0	0
O75964	ATP synthase subunit g, mitochondrial (ATPase subunit g) (ATP synthase membrane subunit g)	0	0	0	0
Q15233	Non-POU domain-containing octamer-binding protein (NonO protein) (54 kDa nuclear RNA- and DNA-binding protein) (55 kDa nuclear protein) (DNA-binding p52/p100 complex, 52 kDa subunit) (NMT55) (p54(nrb)) (p54nrb)	0	0	0	0
P63000	Ras-related C3 botulinum toxin substrate 1 (EC 3.6.5.2) (Cell migration-inducing gene 5 protein) (Ras-like protein TC25) (p21-Rac1)	0	0	0	0
Q96DI7	U5 small nuclear ribonucleoprotein 40 kDa protein (U5 snRNP 40 kDa protein) (U5-40K) (38 kDa-splicing factor) (Prp8-binding protein) (hPRP8BP) (U5 snRNP-specific 40 kDa protein) (WD repeat-containing protein 57)	0	0	0	0
Q9H8H3	Methyltransferase-like protein 7A (EC 2.1.1.-) (Protein AAM-B)	0	0	0	0
P0DJI8	Serum amyloid A-1 protein (SAA) [Cleaved into: Amyloid protein A (Amyloid fibril protein AA); Serum amyloid protein A(2-104); Serum amyloid protein A(3-104); Serum amyloid protein A(2-103); Serum amyloid protein A(2-102); Serum amyloid protein A(4-101)]	0	0	0	0
Q06210	Glutamine--fructose-6-phosphate aminotransferase [isomerizing] 1 (EC 2.6.1.16) (D-fructose-6-phosphate amidotransferase 1) (Glutamine:fructose-6-phosphate amidotransferase 1) (GFAT 1) (GFAT1) (Hexosephosphate aminotransferase 1)	0	0	0	Yes
Q01469	Fatty acid-binding protein 5 (Epidermal-type fatty acid-binding protein) (E-FABP) (Fatty acid-binding protein, epidermal) (Psoriasis-associated fatty acid-binding protein homolog) (PA-FABP)	0	0	0	0
Q9GZM7	Tubulointerstitial nephritis antigen-like (Glucocorticoid-inducible protein 5) (Oxidized LDL-responsive gene 2 protein) (OLRG-2) (Tubulointerstitial nephritis antigen-related protein) (TIN Ag-related protein) (TIN-Ag-RP)	Yes	ECM glycoproteins	Yes	0
P51148	Ras-related protein Rab-5C (L1880) (RAB5L)	0	0	0	0
O14818	Proteasome subunit alpha type-7 (Proteasome subunit RC6-1) (Proteasome subunit XAPC7)	0	0	0	0
Q53EL6	Programmed cell death protein 4 (Neoplastic transformation inhibitor protein) (Nuclear antigen H731-like) (Protein 197/15a)	0	0	0	Yes
P78406	mRNA export factor (Rae1 protein homolog) (mRNA-associated protein mrnp 41)	0	0	0	0
P61970	Nuclear transport factor 2 (NTF-2) (Placental protein 15) (PP15)	0	0	0	0
P62917	60S ribosomal protein L8 (Large ribosomal subunit protein uL2)	0	0	0	0
P62979	Ubiquitin-40S ribosomal protein S27a (Ubiquitin carboxyl extension protein 80) [Cleaved into: Ubiquitin; 40S ribosomal protein S27a (Small ribosomal subunit protein eS31)]	0	0	0	0
P60842	Eukaryotic initiation factor 4A-I (eIF-4A-I) (eIF4A-I) (EC 3.6.4.13) (ATP-dependent RNA helicase eIF4A-1)	0	0	0	0
Q99536	Synaptic vesicle membrane protein VAT-1 homolog (EC 1.-.-.-)	0	0	0	0
Q9H2U2	Inorganic pyrophosphatase 2, mitochondrial (EC 3.6.1.1) (Pyrophosphatase SID6-306) (Pyrophosphate phospho-hydrolase 2) (PPase 2)	0	0	0	0
P15924	Desmoplakin (DP) (250/210 kDa paraneoplastic pemphigus antigen)	0	0	Yes	Yes
P12268	Inosine-5'-monophosphate dehydrogenase 2 (IMP dehydrogenase 2) (IMPD 2) (IMPDH 2) (EC 1.1.1.205) (IMPDH-II)	0	0	0	0
P61204	ADP-ribosylation factor 3	0	0	0	0
P80303	Nucleobindin-2 (DNA-binding protein NEFA) (Epididymis secretory protein Li 109) (Gastric cancer antigen Zg4) (Prepronesfatin) [Cleaved into: Nesfatin-1]	0	0	0	0
Q99879	Histone H2B type 1-M (Histone H2B.e) (H2B/e)	0	0	0	0
P82909	28S ribosomal protein S36, mitochondrial (MRP-S36) (S36mt) (Alpha-ketoglutarate dehydrogenase component 4)	0	0	0	0
P46776	60S ribosomal protein L27a (Large ribosomal subunit protein uL15)	0	0	0	0
Q00796	Sorbitol dehydrogenase (SDH) (EC 1.1.1.-) ((R,R)-butanediol dehydrogenase) (EC 1.1.1.4) (L-iditol 2-dehydrogenase) (EC 1.1.1.14) (Polyol dehydrogenase) (Ribitol dehydrogenase) (RDH) (EC 1.1.1.56) (Xylitol dehydrogenase) (XDH) (EC 1.1.1.9)	0	0	0	0
Q14165	Malectin	0	0	0	0
Q9NPE3	H/ACA ribonucleoprotein complex subunit 3 (Nucleolar protein 10) (Nucleolar protein family A member 3) (snoRNP protein NOP10)	0	0	0	0
P49006	MARCKS-related protein (MARCKS-like protein 1) (Macrophage myristoylated alanine-rich C kinase substrate) (Mac-MARCKS) (MacMARCKS)	0	0	0	0
P63220	40S ribosomal protein S21 (Small ribosomal subunit protein eS21)	0	0	0	0
Q8NI22	Multiple coagulation factor deficiency protein 2 (Neural stem cell-derived neuronal survival protein)	0	0	0	0
Q01518	Adenylyl cyclase-associated protein 1 (CAP 1)	0	0	0	0
P27105	Stomatin (Erythrocyte band 7 integral membrane protein) (Erythrocyte membrane protein band 7.2) (Protein 7.2b)	0	0	0	0
O00303	Eukaryotic translation initiation factor 3 subunit F (eIF3f) (Deubiquitinating enzyme eIF3f) (EC 3.4.19.12) (Eukaryotic translation initiation factor 3 subunit 5) (eIF-3-epsilon) (eIF3 p47)	0	0	0	0
P18085	ADP-ribosylation factor 4	0	0	0	0
P35606	Coatomer subunit beta' (Beta'-coat protein) (Beta'-COP) (p102)	0	0	0	Yes
P50395	Rab GDP dissociation inhibitor beta (Rab GDI beta) (Guanosine diphosphate dissociation inhibitor 2) (GDI-2)	0	0	0	0
P62241	40S ribosomal protein S8 (Small ribosomal subunit protein eS8)	0	0	0	0
P52272	Heterogeneous nuclear ribonucleoprotein M (hnRNP M)	0	0	0	0
Q7RTV0	PHD finger-like domain-containing protein 5A (PHD finger-like domain protein 5A) (Splicing factor 3B-associated 14 kDa protein) (SF3b14b)	0	0	0	0
P12111	Collagen alpha-3(VI) chain	Yes	Collagens	Yes	0
Q8WUH6	Transmembrane protein 263	0	0	0	0
P12694	2-oxoisovalerate dehydrogenase subunit alpha, mitochondrial (EC 1.2.4.4) (Branched-chain alpha-keto acid dehydrogenase E1 component alpha chain) (BCKDE1A) (BCKDH E1-alpha)	0	0	0	Yes
P35527	Keratin, type I cytoskeletal 9 (Cytokeratin-9) (CK-9) (Keratin-9) (K9)	0	0	0	0
P21266	Glutathione S-transferase Mu 3 (EC 2.5.1.18) (GST class-mu 3) (GSTM3-3) (hGSTM3-3)	0	0	0	0
P54577	Tyrosine--tRNA ligase, cytoplasmic (EC 6.1.1.1) (Tyrosyl-tRNA synthetase) (TyrRS) [Cleaved into: Tyrosine--tRNA ligase, cytoplasmic, N-terminally processed]	0	0	0	0
Q99895	Chymotrypsin-C (EC 3.4.21.2) (Caldecrin)	0	0	Yes	0
P21291	Cysteine and glycine-rich protein 1 (Cysteine-rich protein 1) (CRP) (CRP1) (Epididymis luminal protein 141) (HEL-141)	0	0	0	0
Q9UKY7	Protein CDV3 homolog	0	0	0	0
P62269	40S ribosomal protein S18 (Ke-3) (Ke3) (Small ribosomal subunit protein uS13)	0	0	0	0
P18124	60S ribosomal protein L7 (Large ribosomal subunit protein uL30)	0	0	0	0
P62280	40S ribosomal protein S11 (Small ribosomal subunit protein uS17)	0	0	0	0
P36578	60S ribosomal protein L4 (60S ribosomal protein L1) (Large ribosomal subunit protein uL4)	0	0	0	0
O00299	Chloride intracellular channel protein 1 (Chloride channel ABP) (Nuclear chloride ion channel 27) (NCC27) (Regulatory nuclear chloride ion channel protein) (hRNCC)	0	0	0	0
Q3SY69	Mitochondrial 10-formyltetrahydrofolate dehydrogenase (Mitochondrial 10-FTHFDH) (mtFDH) (EC 1.5.1.6) (Aldehyde dehydrogenase family 1 member L2)	0	0	0	0
P62841	40S ribosomal protein S15 (RIG protein) (Small ribosomal subunit protein uS19)	0	0	0	0
Q9BZQ8	Protein Niban 1 (Cell growth-inhibiting gene 39 protein) (Protein FAM129A)	0	0	0	0
Q16698	2,4-dienoyl-CoA reductase [(3E)-enoyl-CoA-producing], mitochondrial (EC 1.3.1.124) (2,4-dienoyl-CoA reductase [NADPH]) (4-enoyl-CoA reductase [NADPH]) (Short chain dehydrogenase/reductase family 18C member 1)	0	0	0	0
P45880	Voltage-dependent anion-selective channel protein 2 (VDAC-2) (hVDAC2) (Outer mitochondrial membrane protein porin 2)	0	0	0	0
Q16555	Dihydropyrimidinase-related protein 2 (DRP-2) (Collapsin response mediator protein 2) (CRMP-2) (N2A3) (Unc-33-like phosphoprotein 2) (ULIP-2)	0	0	0	0
P52943	Cysteine-rich protein 2 (CRP-2) (Protein ESP1)	0	0	0	0
P10909	Clusterin (Aging-associated gene 4 protein) (Apolipoprotein J) (Apo-J) (Complement cytolysis inhibitor) (CLI) (Complement-associated protein SP-40,40) (Ku70-binding protein 1) (NA1/NA2) (Sulfated glycoprotein 2) (SGP-2) (Testosterone-repressed prostate message 2) (TRPM-2) [Cleaved into: Clusterin beta chain (ApoJalpha) (Complement cytolysis inhibitor a chain); Clusterin alpha chain (ApoJbeta) (Co…	0	0	Yes	0
P00390	Glutathione reductase, mitochondrial (GR) (GRase) (EC 1.8.1.7)	0	0	0	0
Q9UHQ9	NADH-cytochrome b5 reductase 1 (b5R.1) (EC 1.6.2.2) (Humb5R2) (NAD(P)H:quinone oxidoreductase type 3 polypeptide A2)	0	0	0	0
Q9NYL4	Peptidyl-prolyl cis-trans isomerase FKBP11 (PPIase FKBP11) (EC 5.2.1.8) (19 kDa FK506-binding protein) (19 kDa FKBP) (FKBP-19) (FK506-binding protein 11) (FKBP-11) (Rotamase)	0	0	0	0
Q92945	Far upstream element-binding protein 2 (FUSE-binding protein 2) (KH type-splicing regulatory protein) (KSRP) (p75)	0	0	0	0
P30740	Leukocyte elastase inhibitor (LEI) (Monocyte/neutrophil elastase inhibitor) (EI) (M/NEI) (Peptidase inhibitor 2) (PI-2) (Serpin B1)	Yes	ECM regulators	0	0
Q02878	60S ribosomal protein L6 (Large ribosomal subunit protein eL6) (Neoplasm-related protein C140) (Tax-responsive enhancer element-binding protein 107) (TaxREB107)	0	0	0	0
P05026	Sodium/potassium-transporting ATPase subunit beta-1 (Sodium/potassium-dependent ATPase subunit beta-1)	0	0	Yes	0
P61020	Ras-related protein Rab-5B	0	0	0	0
P05556	Integrin beta-1 (Fibronectin receptor subunit beta) (Glycoprotein IIa) (GPIIA) (VLA-4 subunit beta) (CD antigen CD29)	0	0	Yes	0
Q15365	Poly(rC)-binding protein 1 (Alpha-CP1) (Heterogeneous nuclear ribonucleoprotein E1) (hnRNP E1) (Nucleic acid-binding protein SUB2.3)	0	0	0	0
P28331	NADH-ubiquinone oxidoreductase 75 kDa subunit, mitochondrial (EC 7.1.1.2) (Complex I-75kD) (CI-75kD)	0	0	0	0
Q96AE4	Far upstream element-binding protein 1 (FBP) (FUSE-binding protein 1) (DNA helicase V) (hDH V)	0	0	Yes	0
P35237	Serpin B6 (Cytoplasmic antiproteinase) (CAP) (Peptidase inhibitor 6) (PI-6) (Placental thrombin inhibitor)	Yes	ECM regulators	0	0
P05091	Aldehyde dehydrogenase, mitochondrial (EC 1.2.1.3) (ALDH class 2) (ALDH-E2) (ALDHI)	0	0	0	0
P35221	Catenin alpha-1 (Alpha E-catenin) (Cadherin-associated protein) (Renal carcinoma antigen NY-REN-13)	0	0	0	0
P22695	Cytochrome b-c1 complex subunit 2, mitochondrial (Complex III subunit 2) (Core protein II) (Ubiquinol-cytochrome-c reductase complex core protein 2)	0	0	0	0
Q14061	Cytochrome c oxidase copper chaperone	0	0	0	0
O15371	Eukaryotic translation initiation factor 3 subunit D (eIF3d) (Eukaryotic translation initiation factor 3 subunit 7) (eIF-3-zeta) (eIF3 p66)	0	0	0	0
P09429	High mobility group protein B1 (High mobility group protein 1) (HMG-1)	0	0	0	0
P00568	Adenylate kinase isoenzyme 1 (AK 1) (EC 2.7.4.3) (EC 2.7.4.6) (ATP-AMP transphosphorylase 1) (ATP:AMP phosphotransferase) (Adenylate monophosphate kinase) (Myokinase)	0	0	0	0
P11413	Glucose-6-phosphate 1-dehydrogenase (G6PD) (EC 1.1.1.49)	0	0	0	0
P49821	NADH dehydrogenase [ubiquinone] flavoprotein 1, mitochondrial (EC 7.1.1.2) (Complex I-51kD) (CI-51kD) (NADH dehydrogenase flavoprotein 1) (NADH-ubiquinone oxidoreductase 51 kDa subunit)	0	0	0	0
P02461	Collagen alpha-1(III) chain	Yes	Collagens	Yes	Yes
O15511	Actin-related protein 2/3 complex subunit 5 (Arp2/3 complex 16 kDa subunit) (p16-ARC)	0	0	0	0
P04179	Superoxide dismutase [Mn], mitochondrial (EC 1.15.1.1)	0	0	0	0
P61626	Lysozyme C (EC 3.2.1.17) (1,4-beta-N-acetylmuramidase C)	0	0	0	0
P57105	Synaptojanin-2-binding protein (Mitochondrial outer membrane protein 25)	0	0	Yes	0
P53621	Coatomer subunit alpha (Alpha-coat protein) (Alpha-COP) (HEP-COP) (HEPCOP) [Cleaved into: Xenin (Xenopsin-related peptide); Proxenin]	0	0	0	0
P00367	Glutamate dehydrogenase 1, mitochondrial (GDH 1) (EC 1.4.1.3)	0	0	0	0
P26599	Polypyrimidine tract-binding protein 1 (PTB) (57 kDa RNA-binding protein PPTB-1) (Heterogeneous nuclear ribonucleoprotein I) (hnRNP I)	0	0	0	0
Q9Y3B3	Transmembrane emp24 domain-containing protein 7 (p24 family protein gamma-3) (p24gamma3) (p27)	0	0	0	0
P22087	rRNA 2'-O-methyltransferase fibrillarin (EC 2.1.1.-) (34 kDa nucleolar scleroderma antigen) (Histone-glutamine methyltransferase) (U6 snRNA 2'-O-methyltransferase fibrillarin)	0	0	0	0
P61019	Ras-related protein Rab-2A	0	0	0	0
P62805	Histone H4	0	0	0	0
P00738	Haptoglobin (Zonulin) [Cleaved into: Haptoglobin alpha chain; Haptoglobin beta chain]	0	0	Yes	0
Q8IW45	ATP-dependent (S)-NAD(P)H-hydrate dehydratase (EC 4.2.1.93) (ATP-dependent NAD(P)HX dehydratase) (Carbohydrate kinase domain-containing protein) (NAD(P)HX dehydratase)	0	0	0	0
Q02252	Methylmalonate-semialdehyde dehydrogenase [acylating], mitochondrial (MMSDH) (Malonate-semialdehyde dehydrogenase [acylating]) (EC 1.2.1.18) (EC 1.2.1.27) (Aldehyde dehydrogenase family 6 member A1)	0	0	0	0
P62906	60S ribosomal protein L10a (CSA-19) (Large ribosomal subunit protein uL1) (Neural precursor cell expressed developmentally down-regulated protein 6) (NEDD-6)	0	0	0	0
P34897	Serine hydroxymethyltransferase, mitochondrial (SHMT) (EC 2.1.2.1) (Glycine hydroxymethyltransferase) (Serine methylase)	0	0	0	0
P15085	Carboxypeptidase A1 (EC 3.4.17.1)	0	0	0	0
P15531	Nucleoside diphosphate kinase A (NDK A) (NDP kinase A) (EC 2.7.4.6) (Granzyme A-activated DNase) (GAAD) (Metastasis inhibition factor nm23) (NM23-H1) (Tumor metastatic process-associated protein)	0	0	0	0
P18669	Phosphoglycerate mutase 1 (EC 5.4.2.11) (EC 5.4.2.4) (BPG-dependent PGAM 1) (Phosphoglycerate mutase isozyme B) (PGAM-B)	0	0	0	0
Q9Y277	Voltage-dependent anion-selective channel protein 3 (VDAC-3) (hVDAC3) (Outer mitochondrial membrane protein porin 3)	0	0	0	0
P10599	Thioredoxin (Trx) (ATL-derived factor) (ADF) (Surface-associated sulphydryl protein) (SASP) (allergen Hom s Trx)	0	0	0	0
Q9UL12	Sarcosine dehydrogenase, mitochondrial (SarDH) (EC 1.5.8.3) (BPR-2)	0	0	0	0
Q8NC51	Plasminogen activator inhibitor 1 RNA-binding protein (PAI1 RNA-binding protein 1) (PAI-RBP1) (SERPINE1 mRNA-binding protein 1)	0	0	0	0
P35555	Fibrillin-1 [Cleaved into: Asprosin]	Yes	ECM glycoproteins	Yes	Yes
P01876	Immunoglobulin heavy constant alpha 1 (Ig alpha-1 chain C region) (Ig alpha-1 chain C region BUR) (Ig alpha-1 chain C region TRO)	0	0	0	0
Q9UNF0	Protein kinase C and casein kinase substrate in neurons protein 2 (Syndapin-2) (Syndapin-II) (SdpII)	0	0	0	0
P08123	Collagen alpha-2(I) chain (Alpha-2 type I collagen)	Yes	Collagens	Yes	Yes
Q9Y6M9	NADH dehydrogenase [ubiquinone] 1 beta subcomplex subunit 9 (Complex I-B22) (CI-B22) (LYR motif-containing protein 3) (NADH-ubiquinone oxidoreductase B22 subunit)	0	0	0	0
Q9Y5L4	Mitochondrial import inner membrane translocase subunit Tim13	0	0	0	0
P02763	Alpha-1-acid glycoprotein 1 (AGP 1) (Orosomucoid-1) (OMD 1)	0	0	Yes	0
Q12907	Vesicular integral-membrane protein VIP36 (Glycoprotein GP36b) (Lectin mannose-binding 2) (Vesicular integral-membrane protein 36) (VIP36)	0	0	Yes	0
P60900	Proteasome subunit alpha type-6 (27 kDa prosomal protein) (PROS-27) (p27K) (Macropain iota chain) (Multicatalytic endopeptidase complex iota chain) (Proteasome iota chain)	0	0	0	0
P52907	F-actin-capping protein subunit alpha-1 (CapZ alpha-1)	0	0	0	0
Q9NPJ3	Acyl-coenzyme A thioesterase 13 (Acyl-CoA thioesterase 13) (EC 3.1.2.-) (Hotdog-fold thioesterase superfamily member 2) (Palmitoyl-CoA hydrolase) (EC 3.1.2.2) (Thioesterase superfamily member 2) (THEM2) [Cleaved into: Acyl-coenzyme A thioesterase 13, N-terminally processed]	0	0	0	0
P30085	UMP-CMP kinase (EC 2.7.4.14) (Deoxycytidylate kinase) (CK) (dCMP kinase) (Nucleoside-diphosphate kinase) (EC 2.7.4.6) (Uridine monophosphate/cytidine monophosphate kinase) (UMP/CMP kinase) (UMP/CMPK)	0	0	Yes	0
P49368	T-complex protein 1 subunit gamma (TCP-1-gamma) (CCT-gamma) (hTRiC5)	0	0	Yes	0
P05141	ADP/ATP translocase 2 (ADP,ATP carrier protein 2) (ADP,ATP carrier protein, fibroblast isoform) (Adenine nucleotide translocator 2) (ANT 2) (Solute carrier family 25 member 5) [Cleaved into: ADP/ATP translocase 2, N-terminally processed]	0	0	0	0
P02748	Complement component C9 [Cleaved into: Complement component C9a; Complement component C9b]	0	0	Yes	0
O00151	PDZ and LIM domain protein 1 (C-terminal LIM domain protein 1) (Elfin) (LIM domain protein CLP-36)	0	0	0	0
P48643	T-complex protein 1 subunit epsilon (TCP-1-epsilon) (CCT-epsilon)	0	0	0	0
P39656	Dolichyl-diphosphooligosaccharide--protein glycosyltransferase 48 kDa subunit (DDOST 48 kDa subunit) (Oligosaccharyl transferase 48 kDa subunit)	0	0	0	0
Q8NBQ5	Estradiol 17-beta-dehydrogenase 11 (EC 1.1.1.62) (17-beta-hydroxysteroid dehydrogenase 11) (17-beta-HSD 11) (17bHSD11) (17betaHSD11) (17-beta-hydroxysteroid dehydrogenase XI) (17-beta-HSD XI) (17betaHSDXI) (Cutaneous T-cell lymphoma-associated antigen HD-CL-03) (CTCL-associated antigen HD-CL-03) (Dehydrogenase/reductase SDR family member 8) (Retinal short-chain dehydrogenase/reductase 2) (retSDR2…	0	0	0	0
P51888	Prolargin (Proline-arginine-rich end leucine-rich repeat protein)	Yes	Proteoglycans	Yes	0
Q9NZN4	EH domain-containing protein 2 (PAST homolog 2)	0	0	0	0
Q13011	Delta(3,5)-Delta(2,4)-dienoyl-CoA isomerase, mitochondrial (EC 5.3.3.-)	0	0	0	0
P31040	Succinate dehydrogenase [ubiquinone] flavoprotein subunit, mitochondrial (EC 1.3.5.1) (Flavoprotein subunit of complex II) (Fp)	0	0	0	0
P55735	Protein SEC13 homolog (GATOR complex protein SEC13) (SEC13-like protein 1) (SEC13-related protein)	0	0	0	0
Q9NP97	Dynein light chain roadblock-type 1 (Bithoraxoid-like protein) (BLP) (Dynein light chain 2A, cytoplasmic) (Dynein-associated protein Km23) (Roadblock domain-containing protein 1)	0	0	0	0
Q9NP72	Ras-related protein Rab-18	0	0	0	0
Q7RTS1	Class A basic helix-loop-helix protein 15 (bHLHa15) (Class B basic helix-loop-helix protein 8) (bHLHb8) (Muscle, intestine and stomach expression 1) (MIST-1)	0	0	0	0
P18077	60S ribosomal protein L35a (Cell growth-inhibiting gene 33 protein) (Large ribosomal subunit protein eL33)	0	0	0	0
P11940	Polyadenylate-binding protein 1 (PABP-1) (Poly(A)-binding protein 1)	0	0	0	0
P20774	Mimecan (Osteoglycin) (Osteoinductive factor) (OIF)	Yes	Proteoglycans	Yes	0
P08729	Keratin, type II cytoskeletal 7 (Cytokeratin-7) (CK-7) (Keratin-7) (K7) (Sarcolectin) (Type-II keratin Kb7)	0	0	0	0
P04844	Dolichyl-diphosphooligosaccharide--protein glycosyltransferase subunit 2 (Dolichyl-diphosphooligosaccharide--protein glycosyltransferase 63 kDa subunit) (RIBIIR) (Ribophorin II) (RPN-II) (Ribophorin-2)	0	0	Yes	0
Q9BTM1	Histone H2A.J (H2a/j)	0	0	0	0
P09651	Heterogeneous nuclear ribonucleoprotein A1 (hnRNP A1) (Helix-destabilizing protein) (Single-strand RNA-binding protein) (hnRNP core protein A1) [Cleaved into: Heterogeneous nuclear ribonucleoprotein A1, N-terminally processed]	0	0	0	Yes
P01871	Immunoglobulin heavy constant mu (Ig mu chain C region) (Ig mu chain C region BOT) (Ig mu chain C region GAL) (Ig mu chain C region OU)	0	0	Yes	0
O60716	Catenin delta-1 (Cadherin-associated Src substrate) (CAS) (p120 catenin) (p120(ctn)) (p120(cas))	0	0	Yes	0
P01009	Alpha-1-antitrypsin (Alpha-1 protease inhibitor) (Alpha-1-antiproteinase) (Serpin A1) [Cleaved into: Short peptide from AAT (SPAAT)]	Yes	ECM regulators	Yes	0
Q99417	c-Myc-binding protein (Associate of Myc 1) (AMY-1)	0	0	0	0
P23246	Splicing factor, proline- and glutamine-rich (100 kDa DNA-pairing protein) (hPOMp100) (DNA-binding p52/p100 complex, 100 kDa subunit) (Polypyrimidine tract-binding protein-associated-splicing factor) (PSF) (PTB-associated-splicing factor)	0	0	0	0
P55259	Pancreatic secretory granule membrane major glycoprotein GP2 (Pancreatic zymogen granule membrane protein GP-2) (ZAP75)	0	0	Yes	0
Q8WUM4	Programmed cell death 6-interacting protein (PDCD6-interacting protein) (ALG-2-interacting protein 1) (ALG-2-interacting protein X) (Hp95)	0	0	0	0
Q96FJ2	Dynein light chain 2, cytoplasmic (8 kDa dynein light chain b) (DLC8b) (Dynein light chain LC8-type 2)	0	0	0	0
P05166	Propionyl-CoA carboxylase beta chain, mitochondrial (PCCase subunit beta) (EC 6.4.1.3) (Propanoyl-CoA:carbon dioxide ligase subunit beta)	0	0	0	0
Q16795	NADH dehydrogenase [ubiquinone] 1 alpha subcomplex subunit 9, mitochondrial (Complex I-39kD) (CI-39kD) (NADH-ubiquinone oxidoreductase 39 kDa subunit)	0	0	0	0
Q9Y6C2	EMILIN-1 (Elastin microfibril interface-located protein 1) (Elastin microfibril interfacer 1)	Yes	ECM glycoproteins	Yes	0
Q96AG4	Leucine-rich repeat-containing protein 59 (Ribosome-binding protein p34) (p34) [Cleaved into: Leucine-rich repeat-containing protein 59, N-terminally processed]	0	0	0	0
P61088	Ubiquitin-conjugating enzyme E2 N (EC 2.3.2.23) (Bendless-like ubiquitin-conjugating enzyme) (E2 ubiquitin-conjugating enzyme N) (Ubc13) (UbcH13) (Ubiquitin carrier protein N) (Ubiquitin-protein ligase N)	0	0	0	0
P39023	60S ribosomal protein L3 (HIV-1 TAR RNA-binding protein B) (TARBP-B) (Large ribosomal subunit protein uL3)	0	0	Yes	0
Q9H223	EH domain-containing protein 4 (Hepatocellular carcinoma-associated protein 10/11) (PAST homolog 4)	0	0	0	0
P14923	Junction plakoglobin (Catenin gamma) (Desmoplakin III) (Desmoplakin-3)	0	0	0	0
P10643	Complement component C7	0	0	Yes	0
P14314	Glucosidase 2 subunit beta (80K-H protein) (Glucosidase II subunit beta) (Protein kinase C substrate 60.1 kDa protein heavy chain) (PKCSH)	0	0	Yes	0
Q86UP6	CUB and zona pellucida-like domain-containing protein 1 (CUB and ZP domain-containing protein 1) (Transmembrane protein UO-44)	0	0	Yes	0
Q14353	Guanidinoacetate N-methyltransferase (EC 2.1.1.2)	0	0	Yes	0
O75874	Isocitrate dehydrogenase [NADP] cytoplasmic (IDH) (EC 1.1.1.42) (Cytosolic NADP-isocitrate dehydrogenase) (IDP) (NADP(+)-specific ICDH) (Oxalosuccinate decarboxylase)	0	0	0	0
P35222	Catenin beta-1 (Beta-catenin)	0	0	0	Yes
P62753	40S ribosomal protein S6 (Phosphoprotein NP33) (Small ribosomal subunit protein eS6)	0	0	0	Yes
Q9Y3Z3	Deoxynucleoside triphosphate triphosphohydrolase SAMHD1 (dNTPase) (EC 3.1.5.-) (Dendritic cell-derived IFNG-induced protein) (DCIP) (Monocyte protein 5) (MOP-5) (SAM domain and HD domain-containing protein 1) (hSAMHD1)	0	0	0	0
O76094	Signal recognition particle subunit SRP72 (SRP72) (Signal recognition particle 72 kDa protein)	0	0	0	0
P08559	Pyruvate dehydrogenase E1 component subunit alpha, somatic form, mitochondrial (EC 1.2.4.1) (PDHE1-A type I)	0	0	0	Yes
Q5SSJ5	Heterochromatin protein 1-binding protein 3 (Protein HP1-BP74)	0	0	0	Yes
P18754	Regulator of chromosome condensation (Cell cycle regulatory protein) (Chromosome condensation protein 1)	0	0	0	0
P31948	Stress-induced-phosphoprotein 1 (STI1) (Hsc70/Hsp90-organizing protein) (Hop) (Renal carcinoma antigen NY-REN-11) (Transformation-sensitive protein IEF SSP 3521)	0	0	Yes	0
Q16181	Septin-7 (CDC10 protein homolog)	0	0	0	0
P08758	Annexin A5 (Anchorin CII) (Annexin V) (Annexin-5) (Calphobindin I) (CBP-I) (Endonexin II) (Lipocortin V) (Placental anticoagulant protein 4) (PP4) (Placental anticoagulant protein I) (PAP-I) (Thromboplastin inhibitor) (Vascular anticoagulant-alpha) (VAC-alpha)	Yes	ECM-affiliated proteins	0	0
P09874	Poly [ADP-ribose] polymerase 1 (PARP-1) (EC 2.4.2.30) (ADP-ribosyltransferase diphtheria toxin-like 1) (ARTD1) (DNA ADP-ribosyltransferase PARP1) (EC 2.4.2.-) (NAD(+) ADP-ribosyltransferase 1) (ADPRT 1) (Poly[ADP-ribose] synthase 1) (Protein poly-ADP-ribosyltransferase PARP1) (EC 2.4.2.-)	0	0	0	0
Q9Y224	RNA transcription, translation and transport factor protein (CLE7 homolog) (CLE) (hCLE)	0	0	0	0
P27635	60S ribosomal protein L10 (Laminin receptor homolog) (Large ribosomal subunit protein uL16) (Protein QM) (Ribosomal protein L10) (Tumor suppressor QM)	0	0	0	0
P20042	Eukaryotic translation initiation factor 2 subunit 2 (Eukaryotic translation initiation factor 2 subunit beta) (eIF-2-beta)	0	0	0	0
Q16836	Hydroxyacyl-coenzyme A dehydrogenase, mitochondrial (HCDH) (EC 1.1.1.35) (Medium and short-chain L-3-hydroxyacyl-coenzyme A dehydrogenase) (Short-chain 3-hydroxyacyl-CoA dehydrogenase)	0	0	0	0
P08865	40S ribosomal protein SA (37 kDa laminin receptor precursor) (37LRP) (37/67 kDa laminin receptor) (LRP/LR) (67 kDa laminin receptor) (67LR) (Colon carcinoma laminin-binding protein) (Laminin receptor 1) (LamR) (Laminin-binding protein precursor p40) (LBP/p40) (Multidrug resistance-associated protein MGr1-Ag) (NEM/1CHD4) (Small ribosomal subunit protein uS2)	0	0	0	0
O15382	Branched-chain-amino-acid aminotransferase, mitochondrial (BCAT(m)) (EC 2.6.1.42) (Placental protein 18) (PP18)	0	0	0	0
Q00610	Clathrin heavy chain 1 (Clathrin heavy chain on chromosome 17) (CLH-17)	0	0	0	0
Q9Y3I0	RNA-splicing ligase RtcB homolog (EC 6.5.1.8) (3'-phosphate/5'-hydroxy nucleic acid ligase)	0	0	0	0
Q6NVY1	3-hydroxyisobutyryl-CoA hydrolase, mitochondrial (EC 3.1.2.4) (3-hydroxyisobutyryl-coenzyme A hydrolase) (HIB-CoA hydrolase) (HIBYL-CoA-H)	0	0	0	0
P14543	Nidogen-1 (NID-1) (Entactin)	Yes	ECM glycoproteins	0	0
P62913	60S ribosomal protein L11 (CLL-associated antigen KW-12) (Large ribosomal subunit protein uL5)	0	0	0	0
P02511	Alpha-crystallin B chain (Alpha(B)-crystallin) (Heat shock protein beta-5) (HspB5) (Renal carcinoma antigen NY-REN-27) (Rosenthal fiber component)	0	0	0	0
Q9UBV2	Protein sel-1 homolog 1 (Suppressor of lin-12-like protein 1) (Sel-1L)	0	0	Yes	0
P00918	Carbonic anhydrase 2 (EC 4.2.1.1) (Carbonate dehydratase II) (Carbonic anhydrase C) (CAC) (Carbonic anhydrase II) (CA-II)	0	0	0	0
P55084	Trifunctional enzyme subunit beta, mitochondrial (TP-beta) [Includes: 3-ketoacyl-CoA thiolase (EC 2.3.1.155) (EC 2.3.1.16) (Acetyl-CoA acyltransferase) (Beta-ketothiolase)]	0	0	0	0
P62854	40S ribosomal protein S26 (Small ribosomal subunit protein eS26)	0	0	Yes	0
O95571	Persulfide dioxygenase ETHE1, mitochondrial (EC 1.13.11.18) (Ethylmalonic encephalopathy protein 1) (Hepatoma subtracted clone one protein) (Sulfur dioxygenase ETHE1)	0	0	0	0
Q13561	Dynactin subunit 2 (50 kDa dynein-associated polypeptide) (Dynactin complex 50 kDa subunit) (DCTN-50) (p50 dynamitin)	0	0	0	0
P00403	Cytochrome c oxidase subunit 2 (EC 7.1.1.9) (Cytochrome c oxidase polypeptide II)	0	0	0	0
Q15084	Protein disulfide-isomerase A6 (EC 5.3.4.1) (Endoplasmic reticulum protein 5) (ER protein 5) (ERp5) (Protein disulfide isomerase P5) (Thioredoxin domain-containing protein 7)	0	0	0	0
P55327	Tumor protein D52 (Protein N8)	0	0	0	0
P14550	Aldo-keto reductase family 1 member A1 (EC 1.1.1.2) (EC 1.1.1.372) (EC 1.1.1.54) (Alcohol dehydrogenase [NADP(+)]) (Aldehyde reductase) (Glucuronate reductase) (EC 1.1.1.19) (Glucuronolactone reductase) (EC 1.1.1.20)	0	0	0	0
P60981	Destrin (Actin-depolymerizing factor) (ADF)	0	0	0	0
P62899	60S ribosomal protein L31 (Large ribosomal subunit protein eL31)	0	0	0	0
P42167	Lamina-associated polypeptide 2, isoforms beta/gamma (Thymopoietin, isoforms beta/gamma) (TP beta/gamma) (Thymopoietin-related peptide isoforms beta/gamma) (TPRP isoforms beta/gamma) [Cleaved into: Thymopoietin (TP) (Splenin); Thymopentin (TP5)]	0	0	0	Yes
P56385	ATP synthase subunit e, mitochondrial (ATPase subunit e) (ATP synthase membrane subunit e) [Cleaved into: ATP synthase subunit e, mitochondrial, N-terminally processed]	0	0	0	0
Q9Y315	Deoxyribose-phosphate aldolase (DERA) (EC 4.1.2.4) (2-deoxy-D-ribose 5-phosphate aldolase) (Phosphodeoxyriboaldolase) (Deoxyriboaldolase)	0	0	0	0
P13804	Electron transfer flavoprotein subunit alpha, mitochondrial (Alpha-ETF)	0	0	0	0
P49257	Protein ERGIC-53 (ER-Golgi intermediate compartment 53 kDa protein) (Gp58) (Intracellular mannose-specific lectin MR60) (Lectin mannose-binding 1)	Yes	ECM-affiliated proteins	0	0
Q00577	Transcriptional activator protein Pur-alpha (Purine-rich single-stranded DNA-binding protein alpha)	0	0	0	0
Q07955	Serine/arginine-rich splicing factor 1 (Alternative-splicing factor 1) (ASF-1) (Splicing factor, arginine/serine-rich 1) (pre-mRNA-splicing factor SF2, P33 subunit)	0	0	0	Yes
Q9NX24	H/ACA ribonucleoprotein complex subunit 2 (Nucleolar protein family A member 2) (snoRNP protein NHP2)	0	0	0	0
P17568	NADH dehydrogenase [ubiquinone] 1 beta subcomplex subunit 7 (Cell adhesion protein SQM1) (Complex I-B18) (CI-B18) (NADH-ubiquinone oxidoreductase B18 subunit)	0	0	0	0
P36957	Dihydrolipoyllysine-residue succinyltransferase component of 2-oxoglutarate dehydrogenase complex, mitochondrial (EC 2.3.1.61) (2-oxoglutarate dehydrogenase complex component E2) (OGDC-E2) (Dihydrolipoamide succinyltransferase component of 2-oxoglutarate dehydrogenase complex) (E2K)	0	0	0	0
P09493	Tropomyosin alpha-1 chain (Alpha-tropomyosin) (Tropomyosin-1)	0	0	0	0
Q0VAF6	Syncollin (Insulin synthesis-associated protein 1)	0	0	0	0
P08240	Signal recognition particle receptor subunit alpha (SR-alpha) (Docking protein alpha) (DP-alpha)	0	0	0	0
O43852	Calumenin (Crocalbin) (IEF SSP 9302)	0	0	0	Yes
Q92499	ATP-dependent RNA helicase DDX1 (EC 3.6.4.13) (DEAD box protein 1) (DEAD box protein retinoblastoma) (DBP-RB)	0	0	Yes	0
Q03135	Caveolin-1	0	0	0	0
P45973	Chromobox protein homolog 5 (Antigen p25) (Heterochromatin protein 1 homolog alpha) (HP1 alpha)	0	0	Yes	0
P15880	40S ribosomal protein S2 (40S ribosomal protein S4) (Protein LLRep3) (Small ribosomal subunit protein uS5)	0	0	0	0
P84157	Matrix-remodeling-associated protein 7	0	0	0	0
P02749	Beta-2-glycoprotein 1 (APC inhibitor) (Activated protein C-binding protein) (Anticardiolipin cofactor) (Apolipoprotein H) (Apo-H) (Beta-2-glycoprotein I) (B2GPI) (Beta(2)GPI)	0	0	Yes	0
Q9NQW7	Xaa-Pro aminopeptidase 1 (EC 3.4.11.9) (Aminoacylproline aminopeptidase) (Cytosolic aminopeptidase P) (Soluble aminopeptidase P) (sAmp) (X-Pro aminopeptidase 1) (X-prolyl aminopeptidase 1, soluble)	0	0	0	0
P40429	60S ribosomal protein L13a (23 kDa highly basic protein) (Large ribosomal subunit protein uL13)	0	0	Yes	0
P38117	Electron transfer flavoprotein subunit beta (Beta-ETF)	0	0	0	0
P36871	Phosphoglucomutase-1 (PGM 1) (EC 5.4.2.2) (Glucose phosphomutase 1)	0	0	0	0
Q9UHB9	Signal recognition particle subunit SRP68 (SRP68) (Signal recognition particle 68 kDa protein)	0	0	0	0
P62266	40S ribosomal protein S23 (Small ribosomal subunit protein uS12)	0	0	0	0
Q15029	116 kDa U5 small nuclear ribonucleoprotein component (Elongation factor Tu GTP-binding domain-containing protein 2) (SNU114 homolog) (hSNU114) (U5 snRNP-specific protein, 116 kDa) (U5-116 kDa)	0	0	0	0
Q96RQ3	Methylcrotonoyl-CoA carboxylase subunit alpha, mitochondrial (MCCase subunit alpha) (EC 6.4.1.4) (3-methylcrotonyl-CoA carboxylase 1) (3-methylcrotonyl-CoA carboxylase biotin-containing subunit) (3-methylcrotonyl-CoA:carbon dioxide ligase subunit alpha)	0	0	0	0
P04216	Thy-1 membrane glycoprotein (CDw90) (Thy-1 antigen) (CD antigen CD90)	0	0	Yes	0
Q04837	Single-stranded DNA-binding protein, mitochondrial (Mt-SSB) (MtSSB) (PWP1-interacting protein 17)	0	0	0	0
P09417	Dihydropteridine reductase (EC 1.5.1.34) (HDHPR) (Quinoid dihydropteridine reductase) (Short chain dehydrogenase/reductase family 33C member 1)	0	0	0	0
P53999	Activated RNA polymerase II transcriptional coactivator p15 (Positive cofactor 4) (PC4) (SUB1 homolog) (p14)	0	0	0	0
O95563	Mitochondrial pyruvate carrier 2 (Brain protein 44)	0	0	0	0
Q9NPA8	Transcription and mRNA export factor ENY2 (Enhancer of yellow 2 transcription factor homolog)	0	0	0	0
P0DMV9	Heat shock 70 kDa protein 1B (Heat shock 70 kDa protein 2) (HSP70-2) (HSP70.2)	0	0	0	0
P30049	ATP synthase subunit delta, mitochondrial (ATP synthase F1 subunit delta) (F-ATPase delta subunit)	0	0	0	0
P37802	Transgelin-2 (Epididymis tissue protein Li 7e) (SM22-alpha homolog)	0	0	0	0
P05062	Fructose-bisphosphate aldolase B (EC 4.1.2.13) (Liver-type aldolase)	0	0	0	0
Q16822	Phosphoenolpyruvate carboxykinase [GTP], mitochondrial (PEPCK-M) (EC 4.1.1.32)	0	0	0	0
Q96HC4	PDZ and LIM domain protein 5 (Enigma homolog) (Enigma-like PDZ and LIM domains protein)	0	0	Yes	0
P0DP25	Calmodulin-3	0	0	0	0
P62316	Small nuclear ribonucleoprotein Sm D2 (Sm-D2) (snRNP core protein D2)	0	0	0	0
P84103	Serine/arginine-rich splicing factor 3 (Pre-mRNA-splicing factor SRP20) (Splicing factor, arginine/serine-rich 3)	0	0	0	Yes
Q92597	Protein NDRG1 (Differentiation-related gene 1 protein) (DRG-1) (N-myc downstream-regulated gene 1 protein) (Nickel-specific induction protein Cap43) (Reducing agents and tunicamycin-responsive protein) (RTP) (Rit42)	0	0	0	0
Q96HE7	ERO1-like protein alpha (ERO1-L) (ERO1-L-alpha) (EC 1.8.4.-) (Endoplasmic oxidoreductin-1-like protein) (Endoplasmic reticulum oxidoreductase alpha) (Oxidoreductin-1-L-alpha)	0	0	Yes	0
O75083	WD repeat-containing protein 1 (Actin-interacting protein 1) (AIP1) (NORI-1)	0	0	0	0
P50991	T-complex protein 1 subunit delta (TCP-1-delta) (CCT-delta) (Stimulator of TAR RNA-binding)	0	0	Yes	0
Q9NYL9	Tropomodulin-3 (Ubiquitous tropomodulin) (U-Tmod)	0	0	0	0
Q13884	Beta-1-syntrophin (59 kDa dystrophin-associated protein A1 basic component 1) (DAPA1B) (BSYN2) (Syntrophin-2) (Tax interaction protein 43) (TIP-43)	0	0	0	0
Q5JTV8	Torsin-1A-interacting protein 1 (Lamin-associated protein 1B) (LAP1B)	0	0	Yes	0
Q15019	Septin-2 (Neural precursor cell expressed developmentally down-regulated protein 5) (NEDD-5)	0	0	0	0
Q06323	Proteasome activator complex subunit 1 (11S regulator complex subunit alpha) (REG-alpha) (Activator of multicatalytic protease subunit 1) (Interferon gamma up-regulated I-5111 protein) (IGUP I-5111) (Proteasome activator 28 subunit alpha) (PA28a) (PA28alpha)	0	0	0	0
Q6DD88	Atlastin-3 (EC 3.6.5.-)	0	0	0	0
P55010	Eukaryotic translation initiation factor 5 (eIF-5)	0	0	0	0
O75380	NADH dehydrogenase [ubiquinone] iron-sulfur protein 6, mitochondrial (Complex I-13kD-A) (CI-13kD-A) (NADH-ubiquinone oxidoreductase 13 kDa-A subunit)	0	0	0	0
Q13263	Transcription intermediary factor 1-beta (TIF1-beta) (E3 SUMO-protein ligase TRIM28) (EC 2.3.2.27) (KRAB-associated protein 1) (KAP-1) (KRAB-interacting protein 1) (KRIP-1) (Nuclear corepressor KAP-1) (RING finger protein 96) (RING-type E3 ubiquitin transferase TIF1-beta) (Tripartite motif-containing protein 28)	0	0	Yes	0
Q9Y490	Talin-1	0	0	0	0
Q05682	Caldesmon (CDM)	0	0	0	0
O95716	Ras-related protein Rab-3D	0	0	Yes	0
P23229	Integrin alpha-6 (CD49 antigen-like family member F) (VLA-6) (CD antigen CD49f) [Cleaved into: Integrin alpha-6 heavy chain; Integrin alpha-6 light chain; Processed integrin alpha-6 (Alpha6p)]	0	0	Yes	0
Q13576	Ras GTPase-activating-like protein IQGAP2	0	0	0	0
Q9C002	Normal mucosa of esophagus-specific gene 1 protein (Protein FOAP-11)	0	0	0	0
P54868	Hydroxymethylglutaryl-CoA synthase, mitochondrial (HMG-CoA synthase) (EC 2.3.3.10) (3-hydroxy-3-methylglutaryl coenzyme A synthase)	0	0	0	0
Q14847	LIM and SH3 domain protein 1 (LASP-1) (Metastatic lymph node gene 50 protein) (MLN 50)	0	0	0	0
Q14108	Lysosome membrane protein 2 (85 kDa lysosomal membrane sialoglycoprotein) (LGP85) (CD36 antigen-like 2) (Lysosome membrane protein II) (LIMP II) (Scavenger receptor class B member 2) (CD antigen CD36)	0	0	Yes	0
Q96DZ1	Endoplasmic reticulum lectin 1 (ER lectin) (Erlectin) (XTP3-transactivated gene B protein)	0	0	Yes	0
O94760	N(G),N(G)-dimethylarginine dimethylaminohydrolase 1 (DDAH-1) (Dimethylarginine dimethylaminohydrolase 1) (EC 3.5.3.18) (DDAHI) (Dimethylargininase-1)	0	0	0	0
P24534	Elongation factor 1-beta (EF-1-beta)	0	0	0	0
Q96AB3	Isochorismatase domain-containing protein 2	0	0	0	0
P17987	T-complex protein 1 subunit alpha (TCP-1-alpha) (CCT-alpha)	0	0	0	0
P51608	Methyl-CpG-binding protein 2 (MeCp-2 protein) (MeCp2)	0	0	0	Yes
P25398	40S ribosomal protein S12 (Small ribosomal subunit protein eS12)	0	0	0	0
P02671	Fibrinogen alpha chain [Cleaved into: Fibrinopeptide A; Fibrinogen alpha chain]	Yes	ECM glycoproteins	0	Yes
P60903	Protein S100-A10 (Calpactin I light chain) (Calpactin-1 light chain) (Cellular ligand of annexin II) (S100 calcium-binding protein A10) (p10 protein) (p11)	Yes	Secreted factors	0	0
Q96EK6	Glucosamine 6-phosphate N-acetyltransferase (EC 2.3.1.4) (Phosphoglucosamine acetylase) (Phosphoglucosamine transacetylase)	0	0	0	0
P24539	ATP synthase F(0) complex subunit B1, mitochondrial (ATP synthase peripheral stalk-membrane subunit b) (ATP synthase proton-transporting mitochondrial F(0) complex subunit B1) (ATP synthase subunit b) (ATPase subunit b)	0	0	0	0
P42704	Leucine-rich PPR motif-containing protein, mitochondrial (130 kDa leucine-rich protein) (LRP 130) (GP130)	0	0	0	0
Q6UXV4	MICOS complex subunit MIC27 (Apolipoprotein O-like) (Protein FAM121A)	0	0	0	0
Q9P0M6	Core histone macro-H2A.2 (Histone macroH2A2) (mH2A2)	0	0	0	0
Q5JPE7	Nodal modulator 2 (pM5 protein 2)	0	0	Yes	0
Q14749	Glycine N-methyltransferase (EC 2.1.1.20)	0	0	0	0
P37235	Hippocalcin-like protein 1 (Calcium-binding protein BDR-1) (HLP2) (Visinin-like protein 3) (VILIP-3)	0	0	0	0
P07195	L-lactate dehydrogenase B chain (LDH-B) (EC 1.1.1.27) (LDH heart subunit) (LDH-H) (Renal carcinoma antigen NY-REN-46)	0	0	0	0
Q96KP4	Cytosolic non-specific dipeptidase (EC 3.4.13.18) (CNDP dipeptidase 2) (Carnosine dipeptidase II) (Epididymis secretory protein Li 13) (Glutamate carboxypeptidase-like protein 1) (Peptidase A)	0	0	Yes	0
P61163	Alpha-centractin (Centractin) (ARP1) (Actin-RPV) (Centrosome-associated actin homolog)	0	0	Yes	0
Q6YN16	Hydroxysteroid dehydrogenase-like protein 2 (EC 1.-.-.-) (Short chain dehydrogenase/reductase family 13C member 1)	0	0	0	0
Q15293	Reticulocalbin-1	0	0	Yes	0
P43307	Translocon-associated protein subunit alpha (TRAP-alpha) (Signal sequence receptor subunit alpha) (SSR-alpha)	0	0	Yes	0
Q14103	Heterogeneous nuclear ribonucleoprotein D0 (hnRNP D0) (AU-rich element RNA-binding protein 1)	0	0	0	Yes
P13489	Ribonuclease inhibitor (Placental ribonuclease inhibitor) (Placental RNase inhibitor) (Ribonuclease/angiogenin inhibitor 1) (RAI)	0	0	0	0
Q96C01	Protein FAM136A	0	0	0	0
P49585	Choline-phosphate cytidylyltransferase A (EC 2.7.7.15) (CCT-alpha) (CTP:phosphocholine cytidylyltransferase A) (CCT A) (CT A) (Phosphorylcholine transferase A)	0	0	0	0
O75306	NADH dehydrogenase [ubiquinone] iron-sulfur protein 2, mitochondrial (EC 7.1.1.2) (Complex I-49kD) (CI-49kD) (NADH-ubiquinone oxidoreductase 49 kDa subunit)	0	0	0	0
P08238	Heat shock protein HSP 90-beta (HSP 90) (Heat shock 84 kDa) (HSP 84) (HSP84)	0	0	0	Yes
Q9Y678	Coatomer subunit gamma-1 (Gamma-1-coat protein) (Gamma-1-COP)	0	0	0	0
P01024	Complement C3 (C3 and PZP-like alpha-2-macroglobulin domain-containing protein 1) [Cleaved into: Complement C3 beta chain; C3-beta-c (C3bc); Complement C3 alpha chain; C3a anaphylatoxin; Acylation stimulating protein (ASP) (C3adesArg); Complement C3b alpha' chain; Complement C3c alpha' chain fragment 1; Complement C3dg fragment; Complement C3g fragment; Complement C3d fragment; Complement C3f fra…	0	0	Yes	0
P00338	L-lactate dehydrogenase A chain (LDH-A) (EC 1.1.1.27) (Cell proliferation-inducing gene 19 protein) (LDH muscle subunit) (LDH-M) (Renal carcinoma antigen NY-REN-59)	0	0	0	0
P06744	Glucose-6-phosphate isomerase (GPI) (EC 5.3.1.9) (Autocrine motility factor) (AMF) (Neuroleukin) (NLK) (Phosphoglucose isomerase) (PGI) (Phosphohexose isomerase) (PHI) (Sperm antigen 36) (SA-36)	0	0	0	0
P18621	60S ribosomal protein L17 (60S ribosomal protein L23) (Large ribosomal subunit protein uL22) (PD-1)	0	0	0	0
Q9Y624	Junctional adhesion molecule A (JAM-A) (Junctional adhesion molecule 1) (JAM-1) (Platelet F11 receptor) (Platelet adhesion molecule 1) (PAM-1) (CD antigen CD321)	0	0	Yes	0
P07951	Tropomyosin beta chain (Beta-tropomyosin) (Tropomyosin-2)	0	0	0	0
P38919	Eukaryotic initiation factor 4A-III (eIF-4A-III) (eIF4A-III) (EC 3.6.4.13) (ATP-dependent RNA helicase DDX48) (ATP-dependent RNA helicase eIF4A-3) (DEAD box protein 48) (Eukaryotic initiation factor 4A-like NUK-34) (Eukaryotic translation initiation factor 4A isoform 3) (Nuclear matrix protein 265) (NMP 265) (hNMP 265) [Cleaved into: Eukaryotic initiation factor 4A-III, N-terminally processed]	0	0	0	0
P32119	Peroxiredoxin-2 (EC 1.11.1.24) (Natural killer cell-enhancing factor B) (NKEF-B) (PRP) (Thiol-specific antioxidant protein) (TSA) (Thioredoxin peroxidase 1) (Thioredoxin-dependent peroxide reductase 1) (Thioredoxin-dependent peroxiredoxin 2)	0	0	0	0
P19404	NADH dehydrogenase [ubiquinone] flavoprotein 2, mitochondrial (EC 7.1.1.2) (NADH-ubiquinone oxidoreductase 24 kDa subunit)	0	0	0	0
P02788	Lactotransferrin (Lactoferrin) (EC 3.4.21.-) (Growth-inhibiting protein 12) (Talalactoferrin) [Cleaved into: Lactoferricin-H (Lfcin-H); Kaliocin-1; Lactoferroxin-A; Lactoferroxin-B; Lactoferroxin-C]	0	0	Yes	0
P43304	Glycerol-3-phosphate dehydrogenase, mitochondrial (GPD-M) (GPDH-M) (EC 1.1.5.3) (mitohondrial glycerophosphate dehydrogenase gene) (mGDH) (mtGPD)	0	0	0	0
Q96TA1	Protein Niban 2 (Meg-3) (Melanoma invasion by ERK) (MINERVA) (Niban-like protein 1) (Protein FAM129B)	0	0	0	0
Q9BY44	Eukaryotic translation initiation factor 2A (eIF-2A) (65 kDa eukaryotic translation initiation factor 2A) [Cleaved into: Eukaryotic translation initiation factor 2A, N-terminally processed]	0	0	0	0
P50552	Vasodilator-stimulated phosphoprotein (VASP)	0	0	0	0
P61916	NPC intracellular cholesterol transporter 2 (Epididymal secretory protein E1) (Human epididymis-specific protein 1) (He1) (Niemann-Pick disease type C2 protein)	0	0	0	0
Q15369	Elongin-C (EloC) (Elongin 15 kDa subunit) (RNA polymerase II transcription factor SIII subunit C) (SIII p15) (Transcription elongation factor B polypeptide 1)	0	0	0	0
P62273	40S ribosomal protein S29 (Small ribosomal subunit protein uS14)	0	0	0	0
O75822	Eukaryotic translation initiation factor 3 subunit J (eIF3j) (Eukaryotic translation initiation factor 3 subunit 1) (eIF-3-alpha) (eIF3 p35)	0	0	0	0
P61769	Beta-2-microglobulin [Cleaved into: Beta-2-microglobulin form pI 5.3]	0	0	0	0
P21397	Amine oxidase [flavin-containing] A (EC 1.4.3.4) (Monoamine oxidase type A) (MAO-A)	0	0	0	0
P62314	Small nuclear ribonucleoprotein Sm D1 (Sm-D1) (Sm-D autoantigen) (snRNP core protein D1)	0	0	0	0
Q99832	T-complex protein 1 subunit eta (TCP-1-eta) (CCT-eta) (HIV-1 Nef-interacting protein) [Cleaved into: T-complex protein 1 subunit eta, N-terminally processed]	0	0	0	0
Q9BVK6	Transmembrane emp24 domain-containing protein 9 (GMP25) (Glycoprotein 25L2) (p24 family protein alpha-2) (p24alpha2) (p25)	0	0	Yes	0
P02753	Retinol-binding protein 4 (Plasma retinol-binding protein) (PRBP) (RBP) [Cleaved into: Plasma retinol-binding protein(1-182); Plasma retinol-binding protein(1-181); Plasma retinol-binding protein(1-179); Plasma retinol-binding protein(1-176)]	0	0	0	0
P61224	Ras-related protein Rap-1b (EC 3.6.5.2) (GTP-binding protein smg p21B)	0	0	0	Yes
Q9H553	Alpha-1,3/1,6-mannosyltransferase ALG2 (EC 2.4.1.132) (EC 2.4.1.257) (Asparagine-linked glycosylation protein 2 homolog) (GDP-Man:Man(1)GlcNAc(2)-PP-Dol alpha-1,3-mannosyltransferase) (GDP-Man:Man(1)GlcNAc(2)-PP-dolichol mannosyltransferase) (GDP-Man:Man(2)GlcNAc(2)-PP-Dol alpha-1,6-mannosyltransferase)	0	0	0	0
P07954	Fumarate hydratase, mitochondrial (Fumarase) (HsFH) (EC 4.2.1.2)	0	0	Yes	0
Q9HC35	Echinoderm microtubule-associated protein-like 4 (EMAP-4) (Restrictedly overexpressed proliferation-associated protein) (Ropp 120)	0	0	Yes	Yes
Q07021	Complement component 1 Q subcomponent-binding protein, mitochondrial (ASF/SF2-associated protein p32) (Glycoprotein gC1qBP) (C1qBP) (Hyaluronan-binding protein 1) (Mitochondrial matrix protein p32) (gC1q-R protein) (p33) (SF2AP32)	0	0	0	0
P11177	Pyruvate dehydrogenase E1 component subunit beta, mitochondrial (PDHE1-B) (EC 1.2.4.1)	0	0	0	0
P54886	Delta-1-pyrroline-5-carboxylate synthase (P5CS) (Aldehyde dehydrogenase family 18 member A1) [Includes: Glutamate 5-kinase (GK) (EC 2.7.2.11) (Gamma-glutamyl kinase); Gamma-glutamyl phosphate reductase (GPR) (EC 1.2.1.41) (Glutamate-5-semialdehyde dehydrogenase) (Glutamyl-gamma-semialdehyde dehydrogenase)]	0	0	0	0
Q9BQ13	BTB/POZ domain-containing protein KCTD14	0	0	0	0
P13861	cAMP-dependent protein kinase type II-alpha regulatory subunit	0	0	0	Yes
Q15437	Protein transport protein Sec23B (hSec23B) (SEC23-related protein B)	0	0	0	0
P61978	Heterogeneous nuclear ribonucleoprotein K (hnRNP K) (Transformation up-regulated nuclear protein) (TUNP)	0	0	0	0
P13473	Lysosome-associated membrane glycoprotein 2 (LAMP-2) (Lysosome-associated membrane protein 2) (CD107 antigen-like family member B) (LGP-96) (CD antigen CD107b)	0	0	Yes	0
Q15907	Ras-related protein Rab-11B (GTP-binding protein YPT3)	0	0	0	0
P51911	Calponin-1 (Basic calponin) (Calponin H1, smooth muscle)	0	0	0	0
P05090	Apolipoprotein D (Apo-D) (ApoD)	0	0	Yes	0
P26196	Probable ATP-dependent RNA helicase DDX6 (EC 3.6.4.13) (ATP-dependent RNA helicase p54) (DEAD box protein 6) (Oncogene RCK)	0	0	0	0
Q9BXN1	Asporin (Periodontal ligament-associated protein 1) (PLAP-1)	Yes	Proteoglycans	Yes	0
Q14764	Major vault protein (MVP) (Lung resistance-related protein)	0	0	0	0
P84095	Rho-related GTP-binding protein RhoG	0	0	0	0
O14745	Na(+)/H(+) exchange regulatory cofactor NHE-RF1 (NHERF-1) (Ezrin-radixin-moesin-binding phosphoprotein 50) (EBP50) (Regulatory cofactor of Na(+)/H(+) exchanger) (Sodium-hydrogen exchanger regulatory factor 1) (Solute carrier family 9 isoform A3 regulatory factor 1)	0	0	0	0
P41219	Peripherin (Neurofilament 4)	0	0	0	0
Q16134	Electron transfer flavoprotein-ubiquinone oxidoreductase, mitochondrial (ETF-QO) (ETF-ubiquinone oxidoreductase) (EC 1.5.5.1) (Electron-transferring-flavoprotein dehydrogenase) (ETF dehydrogenase)	0	0	0	0
Q9UHG3	Prenylcysteine oxidase 1 (EC 1.8.3.5) (Prenylcysteine lyase)	0	0	Yes	0
P06870	Kallikrein-1 (EC 3.4.21.35) (Kidney/pancreas/salivary gland kallikrein) (Tissue kallikrein)	0	0	0	0
P05114	Non-histone chromosomal protein HMG-14 (High mobility group nucleosome-binding domain-containing protein 1)	0	0	0	0
O00159	Unconventional myosin-Ic (Myosin I beta) (MMI-beta) (MMIb)	0	0	0	0
P30040	Endoplasmic reticulum resident protein 29 (ERp29) (Endoplasmic reticulum resident protein 28) (ERp28) (Endoplasmic reticulum resident protein 31) (ERp31)	0	0	0	0
Q9Y394	Dehydrogenase/reductase SDR family member 7 (EC 1.1.-.-) (Retinal short-chain dehydrogenase/reductase 4) (retSDR4) (Short chain dehydrogenase/reductase family 34C member 1)	0	0	0	0
P56556	NADH dehydrogenase [ubiquinone] 1 alpha subcomplex subunit 6 (Complex I-B14) (CI-B14) (LYR motif-containing protein 6) (NADH-ubiquinone oxidoreductase B14 subunit)	0	0	0	0
Q6PCB0	von Willebrand factor A domain-containing protein 1	Yes	ECM glycoproteins	0	0
P04899	Guanine nucleotide-binding protein G(i) subunit alpha-2 (Adenylate cyclase-inhibiting G alpha protein)	0	0	0	0
Q14980	Nuclear mitotic apparatus protein 1 (Nuclear matrix protein-22) (NMP-22) (Nuclear mitotic apparatus protein) (NuMA protein) (SP-H antigen)	0	0	0	0
Q13838	Spliceosome RNA helicase DDX39B (EC 3.6.4.13) (56 kDa U2AF65-associated protein) (ATP-dependent RNA helicase p47) (DEAD box protein UAP56) (HLA-B-associated transcript 1 protein)	0	0	Yes	0
P62495	Eukaryotic peptide chain release factor subunit 1 (Eukaryotic release factor 1) (eRF1) (Protein Cl1) (TB3-1)	0	0	0	0
P52758	2-iminobutanoate/2-iminopropanoate deaminase (EC 3.5.99.10) (14.5 kDa translational inhibitor protein) (hp14.5) (p14.5) (Heat-responsive protein 12) (Reactive intermediate imine deaminase A homolog) (Translation inhibitor L-PSP ribonuclease) (UK114 antigen homolog)	0	0	0	0
O14874	[3-methyl-2-oxobutanoate dehydrogenase [lipoamide]] kinase, mitochondrial (EC 2.7.11.4) (Branched-chain alpha-ketoacid dehydrogenase kinase) (BCKD-kinase) (BCKDHKIN)	0	0	0	0
Q9Y285	Phenylalanine--tRNA ligase alpha subunit (EC 6.1.1.20) (CML33) (Phenylalanyl-tRNA synthetase alpha subunit) (PheRS)	0	0	0	0
Q8NBJ7	Inactive C-alpha-formylglycine-generating enzyme 2 (Paralog of formylglycine-generating enzyme) (pFGE) (Sulfatase-modifying factor 2)	0	0	Yes	0
Q9Y2X3	Nucleolar protein 58 (Nucleolar protein 5)	0	0	0	0
O95810	Caveolae-associated protein 2 (Cavin-2) (PS-p68) (Phosphatidylserine-binding protein) (Serum deprivation-response protein)	0	0	0	0
O00567	Nucleolar protein 56 (Nucleolar protein 5A)	0	0	0	0
P35749	Myosin-11 (Myosin heavy chain 11) (Myosin heavy chain, smooth muscle isoform) (SMMHC)	0	0	Yes	0
P13073	Cytochrome c oxidase subunit 4 isoform 1, mitochondrial (Cytochrome c oxidase polypeptide IV) (Cytochrome c oxidase subunit IV isoform 1) (COX IV-1)	0	0	0	0
P61353	60S ribosomal protein L27 (Large ribosomal subunit protein eL27)	0	0	0	0
P26373	60S ribosomal protein L13 (Breast basic conserved protein 1) (Large ribosomal subunit protein eL13)	0	0	0	0
P49419	Alpha-aminoadipic semialdehyde dehydrogenase (Alpha-AASA dehydrogenase) (EC 1.2.1.31) (Aldehyde dehydrogenase family 7 member A1) (EC 1.2.1.3) (Antiquitin-1) (Betaine aldehyde dehydrogenase) (EC 1.2.1.8) (Delta1-piperideine-6-carboxylate dehydrogenase) (P6c dehydrogenase)	0	0	0	0
Q9UH99	SUN domain-containing protein 2 (Protein unc-84 homolog B) (Rab5-interacting protein) (Rab5IP) (Sad1/unc-84 protein-like 2)	0	0	Yes	0
P60468	Protein transport protein Sec61 subunit beta	0	0	Yes	Yes
P07814	Bifunctional glutamate/proline--tRNA ligase (Bifunctional aminoacyl-tRNA synthetase) (Cell proliferation-inducing gene 32 protein) (Glutamatyl-prolyl-tRNA synthetase) [Includes: Glutamate--tRNA ligase (EC 6.1.1.17) (Glutamyl-tRNA synthetase) (GluRS); Proline--tRNA ligase (EC 6.1.1.15) (Prolyl-tRNA synthetase)]	0	0	0	0
O15143	Actin-related protein 2/3 complex subunit 1B (Arp2/3 complex 41 kDa subunit) (p41-ARC)	0	0	0	0
Q00341	Vigilin (High density lipoprotein-binding protein) (HDL-binding protein)	0	0	0	0
P43487	Ran-specific GTPase-activating protein (Ran-binding protein 1) (RanBP1)	0	0	0	0
P54727	UV excision repair protein RAD23 homolog B (HR23B) (hHR23B) (XP-C repair-complementing complex 58 kDa protein) (p58)	0	0	0	Yes
O00468	Agrin [Cleaved into: Agrin N-terminal 110 kDa subunit; Agrin C-terminal 110 kDa subunit; Agrin C-terminal 90 kDa fragment (C90); Agrin C-terminal 22 kDa fragment (C22)]	Yes	ECM glycoproteins	Yes	0
Q9UHB6	LIM domain and actin-binding protein 1 (Epithelial protein lost in neoplasm)	0	0	0	Yes
P62195	26S proteasome regulatory subunit 8 (26S proteasome AAA-ATPase subunit RPT6) (Proteasome 26S subunit ATPase 5) (Proteasome subunit p45) (Thyroid hormone receptor-interacting protein 1) (TRIP1) (p45/SUG)	0	0	Yes	0
P62750	60S ribosomal protein L23a (Large ribosomal subunit protein uL23)	0	0	0	0
P62910	60S ribosomal protein L32 (Large ribosomal subunit protein eL32)	0	0	0	0
Q14554	Protein disulfide-isomerase A5 (EC 5.3.4.1) (Protein disulfide isomerase-related protein)	0	0	0	0
P30048	Thioredoxin-dependent peroxide reductase, mitochondrial (EC 1.11.1.24) (Antioxidant protein 1) (AOP-1) (HBC189) (Peroxiredoxin III) (Prx-III) (Peroxiredoxin-3) (Protein MER5 homolog) (Thioredoxin-dependent peroxiredoxin 3)	0	0	0	0
Q9HB71	Calcyclin-binding protein (CacyBP) (hCacyBP) (S100A6-binding protein) (Siah-interacting protein)	0	0	0	0
P30044	Peroxiredoxin-5, mitochondrial (EC 1.11.1.24) (Alu corepressor 1) (Antioxidant enzyme B166) (AOEB166) (Liver tissue 2D-page spot 71B) (PLP) (Peroxiredoxin V) (Prx-V) (Peroxisomal antioxidant enzyme) (TPx type VI) (Thioredoxin peroxidase PMP20) (Thioredoxin-dependent peroxiredoxin 5)	0	0	0	0
Q96HY6	DDRGK domain-containing protein 1 (Dashurin) (UFM1-binding and PCI domain-containing protein 1)	0	0	0	0
P61221	ATP-binding cassette sub-family E member 1 (2'-5'-oligoadenylate-binding protein) (HuHP68) (RNase L inhibitor) (Ribonuclease 4 inhibitor) (RNS4I)	0	0	0	0
Q9ULR5	Polyadenylate-binding protein-interacting protein 2B (PABP-interacting protein 2B) (PAIP-2B) (Poly(A)-binding protein-interacting protein 2B)	0	0	0	0
Q86UE4	Protein LYRIC (3D3/LYRIC) (Astrocyte elevated gene-1 protein) (AEG-1) (Lysine-rich CEACAM1 co-isolated protein) (Metadherin) (Metastasis adhesion protein)	0	0	Yes	0
P25189	Myelin protein P0 (Myelin peripheral protein) (MPP) (Myelin protein zero)	0	0	Yes	Yes
Q7Z7K6	Centromere protein V (CENP-V) (Nuclear protein p30) (Proline-rich protein 6)	0	0	0	0
Q07507	Dermatopontin (Tyrosine-rich acidic matrix protein) (TRAMP)	Yes	ECM glycoproteins	0	0
P62072	Mitochondrial import inner membrane translocase subunit Tim10	0	0	0	0
Q14152	Eukaryotic translation initiation factor 3 subunit A (eIF3a) (Eukaryotic translation initiation factor 3 subunit 10) (eIF-3-theta) (eIF3 p167) (eIF3 p180) (eIF3 p185)	0	0	Yes	0
P05164	Myeloperoxidase (MPO) (EC 1.11.2.2) [Cleaved into: Myeloperoxidase; 89 kDa myeloperoxidase; 84 kDa myeloperoxidase; Myeloperoxidase light chain; Myeloperoxidase heavy chain]	0	0	Yes	0
Q15005	Signal peptidase complex subunit 2 (EC 3.4.-.-) (Microsomal signal peptidase 25 kDa subunit) (SPase 25 kDa subunit)	0	0	0	0
Q96CX2	BTB/POZ domain-containing protein KCTD12 (Pfetin) (Predominantly fetal expressed T1 domain)	0	0	0	0
P30405	Peptidyl-prolyl cis-trans isomerase F, mitochondrial (PPIase F) (EC 5.2.1.8) (Cyclophilin D) (CyP-D) (CypD) (Cyclophilin F) (Mitochondrial cyclophilin) (CyP-M) (Rotamase F)	0	0	0	0
Q6IAA8	Ragulator complex protein LAMTOR1 (Late endosomal/lysosomal adaptor and MAPK and MTOR activator 1) (Lipid raft adaptor protein p18) (Protein associated with DRMs and endosomes) (p27Kip1-releasing factor from RhoA) (p27RF-Rho)	0	0	0	0
O95154	Aflatoxin B1 aldehyde reductase member 3 (EC 1.-.-.-) (AFB1 aldehyde reductase 2) (AFB1-AR 2)	0	0	0	0
Q15155	Nodal modulator 1 (pM5 protein)	0	0	Yes	0
P36542	ATP synthase subunit gamma, mitochondrial (ATP synthase F1 subunit gamma) (F-ATPase gamma subunit)	0	0	0	0
P11586	C-1-tetrahydrofolate synthase, cytoplasmic (C1-THF synthase) [Cleaved into: C-1-tetrahydrofolate synthase, cytoplasmic, N-terminally processed] [Includes: Methylenetetrahydrofolate dehydrogenase (EC 1.5.1.5); Methenyltetrahydrofolate cyclohydrolase (EC 3.5.4.9); Formyltetrahydrofolate synthetase (EC 6.3.4.3)]	0	0	0	0
P04040	Catalase (EC 1.11.1.6)	0	0	0	0
P24666	Low molecular weight phosphotyrosine protein phosphatase (LMW-PTP) (LMW-PTPase) (EC 3.1.3.48) (Adipocyte acid phosphatase) (Low molecular weight cytosolic acid phosphatase) (EC 3.1.3.2) (Red cell acid phosphatase 1)	0	0	0	0
P22413	Ectonucleotide pyrophosphatase/phosphodiesterase family member 1 (E-NPP 1) (Membrane component chromosome 6 surface marker 1) (Phosphodiesterase I/nucleotide pyrophosphatase 1) (Plasma-cell membrane glycoprotein PC-1) [Cleaved into: Ectonucleotide pyrophosphatase/phosphodiesterase family member 1, secreted form] [Includes: Alkaline phosphodiesterase I (EC 3.1.4.1); Nucleotide pyrophosphatase (NPP…	0	0	Yes	0
P53990	IST1 homolog (hIST1) (Putative MAPK-activating protein PM28)	0	0	0	0
Q9NR45	Sialic acid synthase (N-acetylneuraminate synthase) (EC 2.5.1.56) (N-acetylneuraminate-9-phosphate synthase) (EC 2.5.1.57) (N-acetylneuraminic acid phosphate synthase) (N-acetylneuraminic acid synthase)	0	0	0	0
Q6UWY5	Olfactomedin-like protein 1	0	0	Yes	0
P48444	Coatomer subunit delta (Archain) (Delta-coat protein) (Delta-COP)	0	0	0	0
P07203	Glutathione peroxidase 1 (GPx-1) (GSHPx-1) (EC 1.11.1.9) (Cellular glutathione peroxidase)	0	0	0	0
Q9UMS4	Pre-mRNA-processing factor 19 (EC 2.3.2.27) (Nuclear matrix protein 200) (PRP19/PSO4 homolog) (hPso4) (RING-type E3 ubiquitin transferase PRP19) (Senescence evasion factor)	0	0	Yes	0
Q9UKU7	Isobutyryl-CoA dehydrogenase, mitochondrial (IBDH) (EC 1.3.8.-) (Activator-recruited cofactor 42 kDa component) (ARC42) (Acyl-CoA dehydrogenase family member 8) (ACAD-8)	0	0	0	0
Q9HCC0	Methylcrotonoyl-CoA carboxylase beta chain, mitochondrial (MCCase subunit beta) (EC 6.4.1.4) (3-methylcrotonyl-CoA carboxylase 2) (3-methylcrotonyl-CoA carboxylase non-biotin-containing subunit) (3-methylcrotonyl-CoA:carbon dioxide ligase subunit beta)	0	0	0	0
P46109	Crk-like protein	0	0	0	0
O14949	Cytochrome b-c1 complex subunit 8 (Complex III subunit 8) (Complex III subunit VIII) (Ubiquinol-cytochrome c reductase complex 9.5 kDa protein) (Ubiquinol-cytochrome c reductase complex ubiquinone-binding protein QP-C)	0	0	0	0
O15173	Membrane-associated progesterone receptor component 2 (Progesterone membrane-binding protein) (Steroid receptor protein DG6)	0	0	0	Yes
P23381	Tryptophan--tRNA ligase, cytoplasmic (EC 6.1.1.2) (Interferon-induced protein 53) (IFP53) (Tryptophanyl-tRNA synthetase) (TrpRS) (hWRS) [Cleaved into: T1-TrpRS; T2-TrpRS]	0	0	0	0
Q9UBX5	Fibulin-5 (FIBL-5) (Developmental arteries and neural crest EGF-like protein) (Dance) (Urine p50 protein) (UP50)	Yes	ECM glycoproteins	Yes	0
P50454	Serpin H1 (47 kDa heat shock protein) (Arsenic-transactivated protein 3) (AsTP3) (Cell proliferation-inducing gene 14 protein) (Collagen-binding protein) (Colligin) (Rheumatoid arthritis-related antigen RA-A47)	Yes	ECM regulators	Yes	0
P09960	Leukotriene A-4 hydrolase (LTA-4 hydrolase) (EC 3.3.2.6) (Leukotriene A(4) hydrolase) (Tripeptide aminopeptidase LTA4H) (EC 3.4.11.4)	0	0	0	0
Q9NX63	MICOS complex subunit MIC19 (Coiled-coil-helix-coiled-coil-helix domain-containing protein 3)	0	0	0	0
Q7Z7H5	Transmembrane emp24 domain-containing protein 4 (Endoplasmic reticulum stress-response protein 25) (ERS25) (GMP25iso) (Putative NF-kappa-B-activating protein 156) (p24 family protein alpha-3) (p24alpha3)	0	0	Yes	0
Q9UNZ2	NSFL1 cofactor p47 (UBX domain-containing protein 2C) (p97 cofactor p47)	0	0	0	0
P25789	Proteasome subunit alpha type-4 (Macropain subunit C9) (Multicatalytic endopeptidase complex subunit C9) (Proteasome component C9) (Proteasome subunit L)	0	0	0	0
P53618	Coatomer subunit beta (Beta-coat protein) (Beta-COP)	0	0	0	0
O00161	Synaptosomal-associated protein 23 (SNAP-23) (Vesicle-membrane fusion protein SNAP-23)	0	0	0	0
P31943	Heterogeneous nuclear ribonucleoprotein H (hnRNP H) [Cleaved into: Heterogeneous nuclear ribonucleoprotein H, N-terminally processed]	0	0	0	0
O60701	UDP-glucose 6-dehydrogenase (UDP-Glc dehydrogenase) (UDP-GlcDH) (UDPGDH) (EC 1.1.1.22)	0	0	0	0
Q07020	60S ribosomal protein L18 (Large ribosomal subunit protein eL18)	0	0	Yes	0
Q9BWJ5	Splicing factor 3B subunit 5 (SF3b5) (Pre-mRNA-splicing factor SF3b 10 kDa subunit)	0	0	0	0
Q9H444	Charged multivesicular body protein 4b (Chromatin-modifying protein 4b) (CHMP4b) (SNF7 homolog associated with Alix 1) (SNF7-2) (hSnf7-2) (Vacuolar protein sorting-associated protein 32-2) (Vps32-2) (hVps32-2)	0	0	0	0
O94874	E3 UFM1-protein ligase 1 (EC 2.3.2.-) (E3 UFM1-protein transferase 1) (Multiple alpha-helix protein located at ER) (Novel LZAP-binding protein) (Regulator of C53/LZAP and DDRGK1)	0	0	0	Yes
P02042	Hemoglobin subunit delta (Delta-globin) (Hemoglobin delta chain)	0	0	0	0
Q13435	Splicing factor 3B subunit 2 (Pre-mRNA-splicing factor SF3b 145 kDa subunit) (SF3b145) (Spliceosome-associated protein 145) (SAP 145)	0	0	0	0
Q9BY50	Signal peptidase complex catalytic subunit SEC11C (EC 3.4.21.89) (Microsomal signal peptidase 21 kDa subunit) (SPase 21 kDa subunit) (SEC11 homolog C) (SEC11-like protein 3) (SPC21)	0	0	0	0
Q9NVA2	Septin-11	0	0	0	0
P10412	Histone H1.4 (Histone H1b) (Histone H1s-4)	0	0	0	Yes
P00995	Serine protease inhibitor Kazal-type 1 (Pancreatic secretory trypsin inhibitor) (Tumor-associated trypsin inhibitor) (TATI)	0	0	0	0
P52209	6-phosphogluconate dehydrogenase, decarboxylating (EC 1.1.1.44)	0	0	0	0
Q14204	Cytoplasmic dynein 1 heavy chain 1 (Cytoplasmic dynein heavy chain 1) (Dynein heavy chain, cytosolic)	0	0	Yes	0
P04004	Vitronectin (VN) (S-protein) (Serum-spreading factor) (V75) [Cleaved into: Vitronectin V65 subunit; Vitronectin V10 subunit; Somatomedin-B]	Yes	ECM glycoproteins	Yes	0
P31930	Cytochrome b-c1 complex subunit 1, mitochondrial (Complex III subunit 1) (Core protein I) (Ubiquinol-cytochrome-c reductase complex core protein 1)	0	0	0	0
P46778	60S ribosomal protein L21 (Large ribosomal subunit protein eL21)	0	0	0	0
Q93052	Lipoma-preferred partner (LIM domain-containing preferred translocation partner in lipoma)	0	0	0	0
Q16775	Hydroxyacylglutathione hydrolase, mitochondrial (EC 3.1.2.6) (Glyoxalase II) (Glx II)	0	0	0	0
O43809	Cleavage and polyadenylation specificity factor subunit 5 (Cleavage and polyadenylation specificity factor 25 kDa subunit) (CPSF 25 kDa subunit) (Cleavage factor Im complex 25 kDa subunit) (CFIm25) (Nucleoside diphosphate-linked moiety X motif 21) (Nudix motif 21) (Nudix hydrolase 21) (Pre-mRNA cleavage factor Im 68 kDa subunit)	0	0	0	0
P61981	14-3-3 protein gamma (Protein kinase C inhibitor protein 1) (KCIP-1) [Cleaved into: 14-3-3 protein gamma, N-terminally processed]	0	0	0	0
O43795	Unconventional myosin-Ib (MYH-1c) (Myosin I alpha) (MMI-alpha) (MMIa)	0	0	Yes	0
Q13510	Acid ceramidase (AC) (ACDase) (Acid CDase) (EC 3.5.1.23) (Acylsphingosine deacylase) (N-acylethanolamine hydrolase ASAH1) (EC 3.5.1.-) (N-acylsphingosine amidohydrolase) (Putative 32 kDa heart protein) (PHP32) [Cleaved into: Acid ceramidase subunit alpha; Acid ceramidase subunit beta]	0	0	Yes	0
O60762	Dolichol-phosphate mannosyltransferase subunit 1 (EC 2.4.1.83) (Dolichol-phosphate mannose synthase subunit 1) (DPM synthase subunit 1) (Dolichyl-phosphate beta-D-mannosyltransferase subunit 1) (Mannose-P-dolichol synthase subunit 1) (MPD synthase subunit 1)	0	0	0	0
O14880	Microsomal glutathione S-transferase 3 (Microsomal GST-3) (Glutathione peroxidase MGST3) (EC 1.11.1.-) (LTC4 synthase MGST3) (EC 4.4.1.20) (Microsomal glutathione S-transferase III) (Microsomal GST-III)	0	0	0	0
Q9Y3U8	60S ribosomal protein L36 (Large ribosomal subunit protein eL36)	0	0	0	0
O95777	U6 snRNA-associated Sm-like protein LSm8	0	0	0	0
P62851	40S ribosomal protein S25 (Small ribosomal subunit protein eS25)	0	0	0	0
P43490	Nicotinamide phosphoribosyltransferase (NAmPRTase) (Nampt) (EC 2.4.2.12) (Pre-B-cell colony-enhancing factor 1) (Pre-B cell-enhancing factor) (Visfatin)	0	0	0	0
Q13404	Ubiquitin-conjugating enzyme E2 variant 1 (UEV-1) (CROC-1) (TRAF6-regulated IKK activator 1 beta Uev1A)	0	0	0	0
P04080	Cystatin-B (CPI-B) (Liver thiol proteinase inhibitor) (Stefin-B)	Yes	ECM regulators	0	0
P61160	Actin-related protein 2 (Actin-like protein 2)	0	0	0	0
P63167	Dynein light chain 1, cytoplasmic (8 kDa dynein light chain) (DLC8) (Dynein light chain LC8-type 1) (Protein inhibitor of neuronal nitric oxide synthase) (PIN)	0	0	0	0
P30626	Sorcin (22 kDa protein) (CP-22) (CP22) (V19)	0	0	0	0
O43396	Thioredoxin-like protein 1 (32 kDa thioredoxin-related protein)	0	0	0	0
Q16270	Insulin-like growth factor-binding protein 7 (IBP-7) (IGF-binding protein 7) (IGFBP-7) (IGFBP-rP1) (MAC25 protein) (PGI2-stimulating factor) (Prostacyclin-stimulating factor) (Tumor-derived adhesion factor) (TAF)	Yes	ECM glycoproteins	0	0
Q6PKG0	La-related protein 1 (La ribonucleoprotein domain family member 1)	0	0	0	Yes
Q9NUJ1	Palmitoyl-protein thioesterase ABHD10, mitochondrial (EC 3.1.2.22) (Acyl-protein thioesterase ABHD10) (Alpha/beta hydrolase domain-containing protein 10) (Abhydrolase domain-containing protein 10) (Mycophenolic acid acyl-glucuronide esterase, mitochondrial) (EC 3.1.1.93)	0	0	0	0
Q6NUQ4	Transmembrane protein 214	0	0	0	0
P41223	Protein BUD31 homolog (Protein EDG-2) (Protein G10 homolog)	0	0	0	0
P11117	Lysosomal acid phosphatase (LAP) (EC 3.1.3.2)	0	0	Yes	0
P02751	Fibronectin (FN) (Cold-insoluble globulin) (CIG) [Cleaved into: Anastellin; Ugl-Y1; Ugl-Y2; Ugl-Y3]	Yes	ECM glycoproteins	Yes	0
Q86YB8	ERO1-like protein beta (ERO1-L-beta) (EC 1.8.4.-) (Endoplasmic reticulum oxidoreductase beta) (Endoplasmic reticulum oxidoreductin-1-like protein B) (Oxidoreductin-1-L-beta)	0	0	Yes	0
Q08830	Fibrinogen-like protein 1 (HP-041) (Hepassocin) (HPS) (Hepatocyte-derived fibrinogen-related protein 1) (HFREP-1) (Liver fibrinogen-related protein 1) (LFIRE-1)	Yes	ECM glycoproteins	0	0
Q92896	Golgi apparatus protein 1 (CFR-1) (Cysteine-rich fibroblast growth factor receptor) (E-selectin ligand 1) (ESL-1) (Golgi sialoglycoprotein MG-160)	0	0	Yes	0
P61927	60S ribosomal protein L37 (G1.16) (Large ribosomal subunit protein eL37)	0	0	0	0
P10301	Ras-related protein R-Ras (EC 3.6.5.-) (p23)	0	0	0	0
Q9Y696	Chloride intracellular channel protein 4 (Intracellular chloride ion channel protein p64H1)	0	0	0	0
Q9NRV9	Heme-binding protein 1 (p22HBP)	0	0	0	0
P61254	60S ribosomal protein L26 (Large ribosomal subunit protein uL24)	0	0	0	0
Q96K17	Transcription factor BTF3 homolog 4 (Basic transcription factor 3-like 4)	0	0	0	0
Q16527	Cysteine and glycine-rich protein 2 (Cysteine-rich protein 2) (CRP2) (LIM domain only protein 5) (LMO-5) (Smooth muscle cell LIM protein) (SmLIM)	0	0	0	0
Q9Y265	RuvB-like 1 (EC 3.6.4.12) (49 kDa TATA box-binding protein-interacting protein) (49 kDa TBP-interacting protein) (54 kDa erythrocyte cytosolic protein) (ECP-54) (INO80 complex subunit H) (Nuclear matrix protein 238) (NMP 238) (Pontin 52) (TIP49a) (TIP60-associated protein 54-alpha) (TAP54-alpha)	0	0	0	0
P16219	Short-chain specific acyl-CoA dehydrogenase, mitochondrial (SCAD) (EC 1.3.8.1) (Butyryl-CoA dehydrogenase)	0	0	0	0
P11182	Lipoamide acyltransferase component of branched-chain alpha-keto acid dehydrogenase complex, mitochondrial (EC 2.3.1.168) (52 kDa mitochondrial autoantigen of primary biliary cirrhosis) (Branched chain 2-oxo-acid dehydrogenase complex component E2) (BCOADC-E2) (Branched-chain alpha-keto acid dehydrogenase complex component E2) (BCKAD-E2) (BCKADE2) (Dihydrolipoamide acetyltransferase component of …	0	0	0	0
Q9NQR4	Omega-amidase NIT2 (EC 3.5.1.3) (Nitrilase homolog 2)	0	0	0	0
Q8WUY1	Protein THEM6 (Mesenchymal stem cell protein DSCD75) (Thioesterase superfamily member 6)	0	0	0	0
P02787	Serotransferrin (Transferrin) (Beta-1 metal-binding globulin) (Siderophilin)	0	0	Yes	0
O94905	Erlin-2 (Endoplasmic reticulum lipid raft-associated protein 2) (Stomatin-prohibitin-flotillin-HflC/K domain-containing protein 2) (SPFH domain-containing protein 2)	0	0	Yes	0
P10645	Chromogranin-A (CgA) (Pituitary secretory protein I) (SP-I) [Cleaved into: Vasostatin-1 (Vasostatin I); Vasostatin-2 (Vasostatin II); EA-92; ES-43; Pancreastatin; SS-18; WA-8; WE-14; LF-19; Catestatin (SL21); AL-11; GV-19; GR-44; ER-37; GE-25; Serpinin-RRG; Serpinin; p-Glu serpinin precursor]	0	0	0	0
Q53H12	Acylglycerol kinase, mitochondrial (hAGK) (EC 2.7.1.107) (EC 2.7.1.138) (EC 2.7.1.94) (Multiple substrate lipid kinase) (HsMuLK) (MuLK) (Multi-substrate lipid kinase)	0	0	0	0
Q14697	Neutral alpha-glucosidase AB (EC 3.2.1.207) (Alpha-glucosidase 2) (Glucosidase II subunit alpha)	0	0	Yes	0
P00488	Coagulation factor XIII A chain (Coagulation factor XIIIa) (EC 2.3.2.13) (Protein-glutamine gamma-glutamyltransferase A chain) (Transglutaminase A chain)	Yes	ECM regulators	Yes	0
O14579	Coatomer subunit epsilon (Epsilon-coat protein) (Epsilon-COP)	0	0	0	0
Q9P0J0	NADH dehydrogenase [ubiquinone] 1 alpha subcomplex subunit 13 (Cell death regulatory protein GRIM-19) (Complex I-B16.6) (CI-B16.6) (Gene associated with retinoic and interferon-induced mortality 19 protein) (GRIM-19) (Gene associated with retinoic and IFN-induced mortality 19 protein) (NADH-ubiquinone oxidoreductase B16.6 subunit)	0	0	0	0
P83731	60S ribosomal protein L24 (60S ribosomal protein L30) (Large ribosomal subunit protein eL24)	0	0	0	0
Q969X5	Endoplasmic reticulum-Golgi intermediate compartment protein 1 (ER-Golgi intermediate compartment 32 kDa protein) (ERGIC-32)	0	0	0	0
Q99584	Protein S100-A13 (S100 calcium-binding protein A13)	Yes	Secreted factors	0	0
Q9UHL4	Dipeptidyl peptidase 2 (EC 3.4.14.2) (Dipeptidyl aminopeptidase II) (Dipeptidyl peptidase 7) (Dipeptidyl peptidase II) (DPP II) (Quiescent cell proline dipeptidase)	0	0	Yes	0
P55884	Eukaryotic translation initiation factor 3 subunit B (eIF3b) (Eukaryotic translation initiation factor 3 subunit 9) (Prt1 homolog) (hPrt1) (eIF-3-eta) (eIF3 p110) (eIF3 p116)	0	0	0	Yes
O15144	Actin-related protein 2/3 complex subunit 2 (Arp2/3 complex 34 kDa subunit) (p34-ARC)	0	0	0	0
P36543	V-type proton ATPase subunit E 1 (V-ATPase subunit E 1) (V-ATPase 31 kDa subunit) (p31) (Vacuolar proton pump subunit E 1)	0	0	0	0
Q14112	Nidogen-2 (NID-2) (Osteonidogen)	Yes	ECM glycoproteins	Yes	0
P07360	Complement component C8 gamma chain	0	0	0	0
P12814	Alpha-actinin-1 (Alpha-actinin cytoskeletal isoform) (F-actin cross-linking protein) (Non-muscle alpha-actinin-1)	0	0	0	0
O75131	Copine-3 (Copine III)	0	0	Yes	0
O75521	Enoyl-CoA delta isomerase 2 (EC 5.3.3.8) (DRS-1) (Delta(3),delta(2)-enoyl-CoA isomerase) (D3,D2-enoyl-CoA isomerase) (Diazepam-binding inhibitor-related protein 1) (DBI-related protein 1) (Dodecenoyl-CoA isomerase) (Hepatocellular carcinoma-associated antigen 88) (Peroxisomal 3,2-trans-enoyl-CoA isomerase) (pECI) (Renal carcinoma antigen NY-REN-1)	0	0	0	0
Q9P016	Thymocyte nuclear protein 1 (Thymocyte protein Thy28)	0	0	0	0
Q9NVJ2	ADP-ribosylation factor-like protein 8B (ADP-ribosylation factor-like protein 10C) (Novel small G protein indispensable for equal chromosome segregation 1)	0	0	0	0
P28838	Cytosol aminopeptidase (EC 3.4.11.1) (Cysteinylglycine-S-conjugate dipeptidase) (EC 3.4.13.23) (Leucine aminopeptidase 3) (LAP-3) (Leucyl aminopeptidase) (Peptidase S) (Proline aminopeptidase) (EC 3.4.11.5) (Prolyl aminopeptidase)	0	0	0	0
P04632	Calpain small subunit 1 (CSS1) (Calcium-activated neutral proteinase small subunit) (CANP small subunit) (Calcium-dependent protease small subunit) (CDPS) (Calcium-dependent protease small subunit 1) (Calpain regulatory subunit)	0	0	Yes	0
P43243	Matrin-3	0	0	0	0
P21980	Protein-glutamine gamma-glutamyltransferase 2 (EC 2.3.2.13) (Tissue transglutaminase) (Transglutaminase C) (TG(C)) (TGC) (TGase C) (Transglutaminase H) (TGase H) (Transglutaminase-2) (TGase-2)	Yes	ECM regulators	0	0
Q02218	2-oxoglutarate dehydrogenase, mitochondrial (EC 1.2.4.2) (2-oxoglutarate dehydrogenase complex component E1) (OGDC-E1) (Alpha-ketoglutarate dehydrogenase)	0	0	0	0
P09210	Glutathione S-transferase A2 (EC 2.5.1.18) (GST HA subunit 2) (GST class-alpha member 2) (GST-gamma) (GSTA2-2) (GTH2)	0	0	0	0
P61011	Signal recognition particle 54 kDa protein (SRP54) (EC 3.6.5.-)	0	0	0	0
Q9BUR5	MICOS complex subunit MIC26 (Apolipoprotein O) (MICOS complex subunit MIC23) (Protein FAM121B)	0	0	0	0
P14209	CD99 antigen (12E7) (E2 antigen) (Protein MIC2) (T-cell surface glycoprotein E2) (CD antigen CD99)	0	0	0	0
O75396	Vesicle-trafficking protein SEC22b (ER-Golgi SNARE of 24 kDa) (ERS-24) (ERS24) (SEC22 vesicle-trafficking protein homolog B) (SEC22 vesicle-trafficking protein-like 1)	0	0	0	0
Q9NSD9	Phenylalanine--tRNA ligase beta subunit (EC 6.1.1.20) (Phenylalanyl-tRNA synthetase beta subunit) (PheRS)	0	0	0	0
P47813	Eukaryotic translation initiation factor 1A, X-chromosomal (eIF-1A X isoform) (Eukaryotic translation initiation factor 4C) (eIF-4C)	0	0	0	0
P53597	Succinate--CoA ligase [ADP/GDP-forming] subunit alpha, mitochondrial (EC 6.2.1.4) (EC 6.2.1.5) (Succinyl-CoA synthetase subunit alpha) (SCS-alpha)	0	0	0	0
P06396	Gelsolin (AGEL) (Actin-depolymerizing factor) (ADF) (Brevin)	0	0	0	0
Q13409	Cytoplasmic dynein 1 intermediate chain 2 (Cytoplasmic dynein intermediate chain 2) (Dynein intermediate chain 2, cytosolic) (DH IC-2)	0	0	0	0
P07339	Cathepsin D (EC 3.4.23.5) [Cleaved into: Cathepsin D light chain; Cathepsin D heavy chain]	Yes	ECM regulators	Yes	0
Q13541	Eukaryotic translation initiation factor 4E-binding protein 1 (4E-BP1) (eIF4E-binding protein 1) (Phosphorylated heat- and acid-stable protein regulated by insulin 1) (PHAS-I)	0	0	0	0
P16284	Platelet endothelial cell adhesion molecule (PECAM-1) (EndoCAM) (GPIIA') (PECA1) (CD antigen CD31)	0	0	Yes	0
P10515	Dihydrolipoyllysine-residue acetyltransferase component of pyruvate dehydrogenase complex, mitochondrial (EC 2.3.1.12) (70 kDa mitochondrial autoantigen of primary biliary cirrhosis) (PBC) (Dihydrolipoamide acetyltransferase component of pyruvate dehydrogenase complex) (M2 antigen complex 70 kDa subunit) (Pyruvate dehydrogenase complex component E2) (PDC-E2) (PDCE2)	0	0	0	0
P40925	Malate dehydrogenase, cytoplasmic (EC 1.1.1.37) (Cytosolic malate dehydrogenase) (Diiodophenylpyruvate reductase) (EC 1.1.1.96)	0	0	Yes	0
P17661	Desmin	0	0	0	0
Q9NR12	PDZ and LIM domain protein 7 (LIM mineralization protein) (LMP) (Protein enigma)	0	0	0	0
P33176	Kinesin-1 heavy chain (Conventional kinesin heavy chain) (Ubiquitous kinesin heavy chain) (UKHC)	0	0	0	0
Q6P587	Acylpyruvase FAHD1, mitochondrial (EC 3.7.1.5) (Fumarylacetoacetate hydrolase domain-containing protein 1) (FAH domain-containing protein 1) (Oxaloacetate decarboxylase) (OAA decarboxylase) (EC 4.1.1.112) (YisK-like protein)	0	0	0	0
Q05707	Collagen alpha-1(XIV) chain (Undulin)	Yes	Collagens	Yes	Yes
Q8N1F7	Nuclear pore complex protein Nup93 (93 kDa nucleoporin) (Nucleoporin Nup93)	0	0	Yes	0
P54315	Inactive pancreatic lipase-related protein 1 (PL-RP1)	0	0	0	0
O00483	Cytochrome c oxidase subunit NDUFA4 (Complex I-MLRQ) (CI-MLRQ) (NADH-ubiquinone oxidoreductase MLRQ subunit)	0	0	0	0
P07686	Beta-hexosaminidase subunit beta (EC 3.2.1.52) (Beta-N-acetylhexosaminidase subunit beta) (Hexosaminidase subunit B) (Cervical cancer proto-oncogene 7 protein) (HCC-7) (N-acetyl-beta-glucosaminidase subunit beta) [Cleaved into: Beta-hexosaminidase subunit beta chain B; Beta-hexosaminidase subunit beta chain A]	0	0	0	0
Q14258	E3 ubiquitin/ISG15 ligase TRIM25 (EC 6.3.2.n3) (Estrogen-responsive finger protein) (RING finger protein 147) (RING-type E3 ubiquitin transferase) (EC 2.3.2.27) (RING-type E3 ubiquitin transferase TRIM25) (Tripartite motif-containing protein 25) (Ubiquitin/ISG15-conjugating enzyme TRIM25) (Zinc finger protein 147)	0	0	0	0
Q9H0W9	Ester hydrolase C11orf54 (EC 3.1.-.-)	0	0	0	0
P37108	Signal recognition particle 14 kDa protein (SRP14) (18 kDa Alu RNA-binding protein)	0	0	0	0
P03928	ATP synthase protein 8 (A6L) (F-ATPase subunit 8)	0	0	0	0
P63218	Guanine nucleotide-binding protein G(I)/G(S)/G(O) subunit gamma-5	0	0	0	0
P16615	Sarcoplasmic/endoplasmic reticulum calcium ATPase 2 (SERCA2) (SR Ca(2+)-ATPase 2) (EC 7.2.2.10) (Calcium pump 2) (Calcium-transporting ATPase sarcoplasmic reticulum type, slow twitch skeletal muscle isoform) (Endoplasmic reticulum class 1/2 Ca(2+) ATPase)	0	0	0	0
Q02978	Mitochondrial 2-oxoglutarate/malate carrier protein (OGCP) (Solute carrier family 25 member 11)	0	0	0	0
Q9UII2	ATPase inhibitor, mitochondrial (ATP synthase F1 subunit epsilon) (Inhibitor of F(1)F(o)-ATPase) (IF(1)) (IF1)	0	0	0	0
P67936	Tropomyosin alpha-4 chain (TM30p1) (Tropomyosin-4)	0	0	0	0
Q8WVV4	Protein POF1B (Premature ovarian failure protein 1B)	0	0	0	Yes
P55145	Mesencephalic astrocyte-derived neurotrophic factor (Arginine-rich protein) (Protein ARMET)	0	0	0	0
Q9UBQ0	Vacuolar protein sorting-associated protein 29 (hVPS29) (PEP11 homolog) (Vesicle protein sorting 29)	0	0	0	0
P13010	X-ray repair cross-complementing protein 5 (EC 3.6.4.-) (86 kDa subunit of Ku antigen) (ATP-dependent DNA helicase 2 subunit 2) (ATP-dependent DNA helicase II 80 kDa subunit) (CTC box-binding factor 85 kDa subunit) (CTC85) (CTCBF) (DNA repair protein XRCC5) (Ku80) (Ku86) (Lupus Ku autoantigen protein p86) (Nuclear factor IV) (Thyroid-lupus autoantigen) (TLAA) (X-ray repair complementing defective…	0	0	0	0
Q92747	Actin-related protein 2/3 complex subunit 1A (SOP2-like protein)	0	0	Yes	0
A1L0T0	2-hydroxyacyl-CoA lyase 2 (EC 4.1.2.-) (Acetolactate synthase-like protein) (IlvB-like protein)	0	0	0	0
P38159	RNA-binding motif protein, X chromosome (Glycoprotein p43) (Heterogeneous nuclear ribonucleoprotein G) (hnRNP G) [Cleaved into: RNA-binding motif protein, X chromosome, N-terminally processed]	0	0	0	0
P05386	60S acidic ribosomal protein P1 (Large ribosomal subunit protein P1)	0	0	0	0
Q92522	Histone H1.10 (Histone H1x)	0	0	0	0
Q14696	LRP chaperone MESD (LDLR chaperone MESD) (Mesoderm development LRP chaperone MESD) (Mesoderm development candidate 2) (Mesoderm development protein) (Renal carcinoma antigen NY-REN-61)	0	0	0	0
P20339	Ras-related protein Rab-5A (EC 3.6.5.2)	0	0	0	0
P62861	40S ribosomal protein S30 (Small ribosomal subunit protein eS30)	0	0	0	0
Q8NFW8	N-acylneuraminate cytidylyltransferase (EC 2.7.7.43) (CMP-N-acetylneuraminic acid synthase) (CMP-NeuNAc synthase)	0	0	0	0
P51159	Ras-related protein Rab-27A (Rab-27) (EC 3.6.5.2) (GTP-binding protein Ram)	0	0	0	0
O15305	Phosphomannomutase 2 (PMM 2) (EC 5.4.2.8)	0	0	0	0
P51553	Isocitrate dehydrogenase [NAD] subunit gamma, mitochondrial (Isocitric dehydrogenase subunit gamma) (NAD(+)-specific ICDH subunit gamma)	0	0	0	0
P02458	Collagen alpha-1(II) chain (Alpha-1 type II collagen) [Cleaved into: Collagen alpha-1(II) chain; Chondrocalcin]	Yes	Collagens	0	0
P62318	Small nuclear ribonucleoprotein Sm D3 (Sm-D3) (snRNP core protein D3)	0	0	0	0
Q08211	ATP-dependent RNA helicase A (EC 3.6.4.13) (DEAH box protein 9) (DExH-box helicase 9) (Leukophysin) (LKP) (Nuclear DNA helicase II) (NDH II) (RNA helicase A)	0	0	0	0
P32322	Pyrroline-5-carboxylate reductase 1, mitochondrial (P5C reductase 1) (P5CR 1) (EC 1.5.1.2)	0	0	0	0
P47756	F-actin-capping protein subunit beta (CapZ beta)	0	0	0	0
P04439	HLA class I histocompatibility antigen, A alpha chain (Human leukocyte antigen A) (HLA-A)	0	0	Yes	0
P35580	Myosin-10 (Cellular myosin heavy chain, type B) (Myosin heavy chain 10) (Myosin heavy chain, non-muscle IIb) (Non-muscle myosin heavy chain B) (NMMHC-B) (Non-muscle myosin heavy chain IIb) (NMMHC II-b) (NMMHC-IIB)	0	0	0	0
P05023	Sodium/potassium-transporting ATPase subunit alpha-1 (Na(+)/K(+) ATPase alpha-1 subunit) (EC 7.2.2.13) (Sodium pump subunit alpha-1)	0	0	0	0
P00492	Hypoxanthine-guanine phosphoribosyltransferase (HGPRT) (HGPRTase) (EC 2.4.2.8)	0	0	0	0
P52597	Heterogeneous nuclear ribonucleoprotein F (hnRNP F) (Nucleolin-like protein mcs94-1) [Cleaved into: Heterogeneous nuclear ribonucleoprotein F, N-terminally processed]	0	0	0	0
P54136	Arginine--tRNA ligase, cytoplasmic (EC 6.1.1.19) (Arginyl-tRNA synthetase) (ArgRS)	0	0	0	0
P47897	Glutamine--tRNA ligase (EC 6.1.1.18) (Glutaminyl-tRNA synthetase) (GlnRS)	0	0	0	0
P09012	U1 small nuclear ribonucleoprotein A (U1 snRNP A) (U1-A) (U1A)	0	0	0	0
P59768	Guanine nucleotide-binding protein G(I)/G(S)/G(O) subunit gamma-2 (G gamma-I)	0	0	0	0
P09467	Fructose-1,6-bisphosphatase 1 (FBPase 1) (EC 3.1.3.11) (D-fructose-1,6-bisphosphate 1-phosphohydrolase 1) (Liver FBPase)	0	0	0	0
P06748	Nucleophosmin (NPM) (Nucleolar phosphoprotein B23) (Nucleolar protein NO38) (Numatrin)	0	0	0	0
O95831	Apoptosis-inducing factor 1, mitochondrial (EC 1.6.99.-) (Programmed cell death protein 8)	0	0	0	0
O15498	Synaptobrevin homolog YKT6 (EC 2.3.1.-)	0	0	0	0
Q9NRX4	14 kDa phosphohistidine phosphatase (EC 3.9.1.3) (Phosphohistidine phosphatase 1) (PHPT1) (Protein histidine phosphatase) (PHP) (Protein janus-A homolog)	0	0	0	0
P46782	40S ribosomal protein S5 (Small ribosomal subunit protein uS7) [Cleaved into: 40S ribosomal protein S5, N-terminally processed]	0	0	0	0
Q6UW02	Cytochrome P450 20A1 (EC 1.14.-.-)	0	0	0	0
P30043	Flavin reductase (NADPH) (FR) (EC 1.5.1.30) (Biliverdin reductase B) (BVR-B) (EC 1.3.1.24) (Biliverdin-IX beta-reductase) (Green heme-binding protein) (GHBP) (NADPH-dependent diaphorase) (NADPH-flavin reductase) (FLR)	0	0	0	0
Q15008	26S proteasome non-ATPase regulatory subunit 6 (26S proteasome regulatory subunit RPN7) (26S proteasome regulatory subunit S10) (Breast cancer-associated protein SGA-113M) (Phosphonoformate immuno-associated protein 4) (Proteasome regulatory particle subunit p44S10) (p42A)	0	0	0	0
Q9Y2R0	Cytochrome c oxidase assembly factor 3 homolog, mitochondrial (Coiled-coil domain-containing protein 56) (Mitochondrial translation regulation assembly intermediate of cytochrome c oxidase protein of 12 kDa)	0	0	0	0
Q99959	Plakophilin-2	0	0	0	0
Q9P2R7	Succinate--CoA ligase [ADP-forming] subunit beta, mitochondrial (EC 6.2.1.5) (ATP-specific succinyl-CoA synthetase subunit beta) (A-SCS) (Succinyl-CoA synthetase beta-A chain) (SCS-betaA)	0	0	0	0
P61586	Transforming protein RhoA (EC 3.6.5.2) (Rho cDNA clone 12) (h12)	0	0	0	0
P29992	Guanine nucleotide-binding protein subunit alpha-11 (G alpha-11) (G-protein subunit alpha-11) (Guanine nucleotide-binding protein G(y) subunit alpha)	0	0	0	0
P15144	Aminopeptidase N (AP-N) (hAPN) (EC 3.4.11.2) (Alanyl aminopeptidase) (Aminopeptidase M) (AP-M) (Microsomal aminopeptidase) (Myeloid plasma membrane glycoprotein CD13) (gp150) (CD antigen CD13)	0	0	Yes	0
Q9Y6N6	Laminin subunit gamma-3 (Laminin-12 subunit gamma) (Laminin-14 subunit gamma) (Laminin-15 subunit gamma)	Yes	ECM glycoproteins	Yes	0
Q13724	Mannosyl-oligosaccharide glucosidase (EC 3.2.1.106) (Processing A-glucosidase I)	0	0	0	0
P02760	Protein AMBP [Cleaved into: Alpha-1-microglobulin (Protein HC) (Alpha-1 microglycoprotein) (Complex-forming glycoprotein heterogeneous in charge); Inter-alpha-trypsin inhibitor light chain (ITI-LC) (Bikunin) (EDC1) (HI-30) (Uronic-acid-rich protein); Trypstatin]	Yes	ECM regulators	0	0
P38606	V-type proton ATPase catalytic subunit A (V-ATPase subunit A) (EC 7.1.2.2) (V-ATPase 69 kDa subunit) (Vacuolar ATPase isoform VA68) (Vacuolar proton pump subunit alpha)	0	0	Yes	0
O15145	Actin-related protein 2/3 complex subunit 3 (Arp2/3 complex 21 kDa subunit) (p21-ARC)	0	0	0	0
P62140	Serine/threonine-protein phosphatase PP1-beta catalytic subunit (PP-1B) (PPP1CD) (EC 3.1.3.16) (EC 3.1.3.53)	0	0	0	0
Q10471	Polypeptide N-acetylgalactosaminyltransferase 2 (EC 2.4.1.41) (Polypeptide GalNAc transferase 2) (GalNAc-T2) (pp-GaNTase 2) (Protein-UDP acetylgalactosaminyltransferase 2) (UDP-GalNAc:polypeptide N-acetylgalactosaminyltransferase 2) [Cleaved into: Polypeptide N-acetylgalactosaminyltransferase 2 soluble form]	0	0	0	0
Q9BWS9	Chitinase domain-containing protein 1 (Stabilin-1-interacting chitinase-like protein) (SI-CLP)	0	0	0	0
Q96DN0	Endoplasmic reticulum resident protein 27 (ER protein 27) (ERp27) (Inactive protein disulfide-isomerase 27)	0	0	Yes	0
P26440	Isovaleryl-CoA dehydrogenase, mitochondrial (IVD) (EC 1.3.8.4) (Butyryl-CoA dehydrogenase) (EC 1.3.8.1)	0	0	0	0
Q13242	Serine/arginine-rich splicing factor 9 (Pre-mRNA-splicing factor SRp30C) (Splicing factor, arginine/serine-rich 9)	0	0	0	0
P01903	HLA class II histocompatibility antigen, DR alpha chain (MHC class II antigen DRA)	0	0	Yes	0
O95139	NADH dehydrogenase [ubiquinone] 1 beta subcomplex subunit 6 (Complex I-B17) (CI-B17) (NADH-ubiquinone oxidoreductase B17 subunit)	0	0	Yes	0
Q9BX68	Histidine triad nucleotide-binding protein 2, mitochondrial (HINT-2) (EC 3.-.-.-) (HINT-3) (HIT-17kDa) (PKCI-1-related HIT protein)	0	0	0	0
Q15738	Sterol-4-alpha-carboxylate 3-dehydrogenase, decarboxylating (EC 1.1.1.170) (Protein H105e3)	0	0	0	0
P09622	Dihydrolipoyl dehydrogenase, mitochondrial (EC 1.8.1.4) (Dihydrolipoamide dehydrogenase) (Glycine cleavage system L protein)	0	0	Yes	0
P56277	Cx9C motif-containing protein 4 (Mature T-cell proliferation 1 neighbor protein) (Mature T-cell proliferation-1 type A) (MTCP-1 type A) (Protein p8 MTCP-1) (p8MTCP1)	0	0	0	0
P28066	Proteasome subunit alpha type-5 (Macropain zeta chain) (Multicatalytic endopeptidase complex zeta chain) (Proteasome zeta chain)	0	0	0	0
Q9UJC5	SH3 domain-binding glutamic acid-rich-like protein 2 (Fovea-associated SH3 domain-binding protein)	0	0	0	0
Q00839	Heterogeneous nuclear ribonucleoprotein U (hnRNP U) (GRIP120) (Nuclear p120 ribonucleoprotein) (Scaffold-attachment factor A) (SAF-A) (p120) (pp120)	0	0	0	Yes
Q9HCU5	Prolactin regulatory element-binding protein (Mammalian guanine nucleotide exchange factor mSec12)	0	0	0	0
P16422	Epithelial cell adhesion molecule (Ep-CAM) (Adenocarcinoma-associated antigen) (Cell surface glycoprotein Trop-1) (Epithelial cell surface antigen) (Epithelial glycoprotein) (EGP) (Epithelial glycoprotein 314) (EGP314) (hEGP314) (KS 1/4 antigen) (KSA) (Major gastrointestinal tumor-associated protein GA733-2) (Tumor-associated calcium signal transducer 1) (CD antigen CD326)	0	0	Yes	0
P11908	Ribose-phosphate pyrophosphokinase 2 (EC 2.7.6.1) (PPRibP) (Phosphoribosyl pyrophosphate synthase II) (PRS-II)	0	0	0	0
Q9Y3B4	Splicing factor 3B subunit 6 (Pre-mRNA branch site protein p14) (SF3b 14 kDa subunit) (SF3B14a) (Spliceosome-associated protein, 14-kDa) (Splicing factor 3b, subunit 6, 14kDa)	0	0	0	0
O15212	Prefoldin subunit 6 (Protein Ke2)	0	0	0	0
P23193	Transcription elongation factor A protein 1 (Transcription elongation factor S-II protein 1) (Transcription elongation factor TFIIS.o)	0	0	0	0
Q92520	Protein FAM3C (Interleukin-like EMT inducer)	0	0	0	0
P61513	60S ribosomal protein L37a (Large ribosomal subunit protein eL43)	0	0	0	0
P09758	Tumor-associated calcium signal transducer 2 (Cell surface glycoprotein Trop-2) (Membrane component chromosome 1 surface marker 1) (Pancreatic carcinoma marker protein GA733-1)	0	0	Yes	0
Q9H936	Mitochondrial glutamate carrier 1 (GC-1) (Glutamate/H(+) symporter 1) (Solute carrier family 25 member 22)	0	0	0	0
Q9Y617	Phosphoserine aminotransferase (EC 2.6.1.52) (Phosphohydroxythreonine aminotransferase) (PSAT)	0	0	0	0
Q9P2B2	Prostaglandin F2 receptor negative regulator (CD9 partner 1) (CD9P-1) (Glu-Trp-Ile EWI motif-containing protein F) (EWI-F) (Prostaglandin F2-alpha receptor regulatory protein) (Prostaglandin F2-alpha receptor-associated protein) (CD antigen CD315)	0	0	Yes	0
P46459	Vesicle-fusing ATPase (EC 3.6.4.6) (N-ethylmaleimide-sensitive fusion protein) (NEM-sensitive fusion protein) (Vesicular-fusion protein NSF)	0	0	0	0
P27338	Amine oxidase [flavin-containing] B (EC 1.4.3.4) (Monoamine oxidase type B) (MAO-B)	0	0	0	0
P19388	DNA-directed RNA polymerases I, II, and III subunit RPABC1 (RNA polymerases I, II, and III subunit ABC1) (DNA-directed RNA polymerase II 23 kDa polypeptide) (DNA-directed RNA polymerase II subunit E) (RPB5 homolog) (XAP4)	0	0	0	0
Q08380	Galectin-3-binding protein (Basement membrane autoantigen p105) (Lectin galactoside-binding soluble 3-binding protein) (Mac-2-binding protein) (MAC2BP) (Mac-2 BP) (Tumor-associated antigen 90K)	0	0	Yes	0
P18859	ATP synthase-coupling factor 6, mitochondrial (ATPase subunit F6) (ATP synthase peripheral stalk subunit F6)	0	0	0	0
Q15717	ELAV-like protein 1 (Hu-antigen R) (HuR)	0	0	0	0
Q9UJ70	N-acetyl-D-glucosamine kinase (N-acetylglucosamine kinase) (EC 2.7.1.59) (GlcNAc kinase)	0	0	0	0
Q14683	Structural maintenance of chromosomes protein 1A (SMC protein 1A) (SMC-1-alpha) (SMC-1A) (Sb1.8)	0	0	0	0
P16870	Carboxypeptidase E (CPE) (EC 3.4.17.10) (Carboxypeptidase H) (CPH) (Enkephalin convertase) (Prohormone-processing carboxypeptidase)	0	0	Yes	0
P40616	ADP-ribosylation factor-like protein 1	0	0	0	0
Q9Y6C9	Mitochondrial carrier homolog 2 (Met-induced mitochondrial protein)	0	0	0	0
P04733	Metallothionein-1F (MT-1F) (Metallothionein-IF) (MT-IF)	0	0	Yes	0
Q969V3	Nicalin (Nicastrin-like protein)	0	0	Yes	0
P35625	Metalloproteinase inhibitor 3 (Protein MIG-5) (Tissue inhibitor of metalloproteinases 3) (TIMP-3)	Yes	ECM regulators	0	0
P21281	V-type proton ATPase subunit B, brain isoform (V-ATPase subunit B 2) (Endomembrane proton pump 58 kDa subunit) (HO57) (Vacuolar proton pump subunit B 2)	0	0	0	0
Q9H1E3	Nuclear ubiquitous casein and cyclin-dependent kinase substrate 1 (P1)	0	0	0	Yes
P20160	Azurocidin (Cationic antimicrobial protein CAP37) (Heparin-binding protein) (HBP) (hHBP)	0	0	Yes	0
P11310	Medium-chain specific acyl-CoA dehydrogenase, mitochondrial (MCAD) (EC 1.3.8.7) (Medium chain acyl-CoA dehydrogenase) (MCADH)	0	0	0	0
O60506	Heterogeneous nuclear ribonucleoprotein Q (hnRNP Q) (Glycine- and tyrosine-rich RNA-binding protein) (GRY-RBP) (NS1-associated protein 1) (Synaptotagmin-binding, cytoplasmic RNA-interacting protein)	0	0	0	0
O60220	Mitochondrial import inner membrane translocase subunit Tim8 A (Deafness dystonia protein 1) (X-linked deafness dystonia protein)	0	0	0	0
P80188	Neutrophil gelatinase-associated lipocalin (NGAL) (25 kDa alpha-2-microglobulin-related subunit of MMP-9) (Lipocalin-2) (Oncogene 24p3) (Siderocalin) (p25)	0	0	Yes	0
O94855	Protein transport protein Sec24D (SEC24-related protein D)	0	0	0	0
P43155	Carnitine O-acetyltransferase (Carnitine acetylase) (EC 2.3.1.137) (EC 2.3.1.7) (Carnitine acetyltransferase) (CAT) (CrAT)	0	0	0	0
P62191	26S proteasome regulatory subunit 4 (P26s4) (26S proteasome AAA-ATPase subunit RPT2) (Proteasome 26S subunit ATPase 1)	0	0	0	0
Q00688	Peptidyl-prolyl cis-trans isomerase FKBP3 (PPIase FKBP3) (EC 5.2.1.8) (25 kDa FK506-binding protein) (25 kDa FKBP) (FKBP-25) (FK506-binding protein 3) (FKBP-3) (Immunophilin FKBP25) (Rapamycin-selective 25 kDa immunophilin) (Rotamase)	0	0	0	0
Q15124	Phosphoglucomutase-like protein 5 (Aciculin) (Phosphoglucomutase-related protein) (PGM-RP)	0	0	0	Yes
P23141	Liver carboxylesterase 1 (Acyl-coenzyme A:cholesterol acyltransferase) (ACAT) (Brain carboxylesterase hBr1) (Carboxylesterase 1) (CE-1) (hCE-1) (EC 3.1.1.1) (Cholesteryl ester hydrolase) (CEH) (EC 3.1.1.13) (Cocaine carboxylesterase) (Egasyn) (HMSE) (Methylumbelliferyl-acetate deacetylase 1) (EC 3.1.1.56) (Monocyte/macrophage serine esterase) (Retinyl ester hydrolase) (REH) (Serine esterase 1) (T…	0	0	Yes	0
P62333	26S proteasome regulatory subunit 10B (26S proteasome AAA-ATPase subunit RPT4) (Proteasome 26S subunit ATPase 6) (Proteasome subunit p42)	0	0	0	0
O75533	Splicing factor 3B subunit 1 (Pre-mRNA-splicing factor SF3b 155 kDa subunit) (SF3b155) (Spliceosome-associated protein 155) (SAP 155)	0	0	Yes	0
P62424	60S ribosomal protein L7a (Large ribosomal subunit protein eL8) (PLA-X polypeptide) (Surfeit locus protein 3)	0	0	0	0
Q8N5K1	CDGSH iron-sulfur domain-containing protein 2 (Endoplasmic reticulum intermembrane small protein) (MitoNEET-related 1 protein) (Miner1) (Nutrient-deprivation autophagy factor-1) (NAF-1)	0	0	0	0
P05997	Collagen alpha-2(V) chain	Yes	Collagens	Yes	Yes
Q09028	Histone-binding protein RBBP4 (Chromatin assembly factor 1 subunit C) (CAF-1 subunit C) (Chromatin assembly factor I p48 subunit) (CAF-I 48 kDa subunit) (CAF-I p48) (Nucleosome-remodeling factor subunit RBAP48) (Retinoblastoma-binding protein 4) (RBBP-4) (Retinoblastoma-binding protein p48)	0	0	0	0
Q1KMD3	Heterogeneous nuclear ribonucleoprotein U-like protein 2 (Scaffold-attachment factor A2) (SAF-A2)	0	0	0	Yes
P13797	Plastin-3 (T-plastin)	0	0	Yes	0
P40121	Macrophage-capping protein (Actin regulatory protein CAP-G)	0	0	0	0
O95994	Anterior gradient protein 2 homolog (AG-2) (hAG-2) (HPC8) (Secreted cement gland protein XAG-2 homolog)	0	0	0	0
Q9NUP9	Protein lin-7 homolog C (Lin-7C) (Mammalian lin-seven protein 3) (MALS-3) (Vertebrate lin-7 homolog 3) (Veli-3)	0	0	0	0
P36969	Phospholipid hydroperoxide glutathione peroxidase (PHGPx) (EC 1.11.1.12) (Glutathione peroxidase 4) (GPx-4) (GSHPx-4)	0	0	0	0
P06727	Apolipoprotein A-IV (Apo-AIV) (ApoA-IV) (Apolipoprotein A4)	0	0	0	0
Q06278	Aldehyde oxidase (EC 1.2.3.1) (Aldehyde oxidase 1) (Azaheterocycle hydroxylase) (EC 1.17.3.-)	0	0	0	0
Q92841	Probable ATP-dependent RNA helicase DDX17 (EC 3.6.4.13) (DEAD box protein 17) (DEAD box protein p72) (DEAD box protein p82) (RNA-dependent helicase p72)	0	0	0	0
Q9NSE4	Isoleucine--tRNA ligase, mitochondrial (EC 6.1.1.5) (Isoleucyl-tRNA synthetase) (IleRS)	0	0	0	0
Q9UHD8	Septin-9 (MLL septin-like fusion protein MSF-A) (MLL septin-like fusion protein) (Ovarian/Breast septin) (Ov/Br septin) (Septin D1)	0	0	0	0
O43772	Mitochondrial carnitine/acylcarnitine carrier protein (Carnitine/acylcarnitine translocase) (CAC) (Solute carrier family 25 member 20)	0	0	0	0
O94826	Mitochondrial import receptor subunit TOM70 (Mitochondrial precursor proteins import receptor) (Translocase of outer membrane 70 kDa subunit) (Translocase of outer mitochondrial membrane protein 70)	0	0	0	Yes
Q9HBL0	Tensin-1	0	0	Yes	0
O95299	NADH dehydrogenase [ubiquinone] 1 alpha subcomplex subunit 10, mitochondrial (Complex I-42kD) (CI-42kD) (NADH-ubiquinone oxidoreductase 42 kDa subunit)	0	0	0	0
P48728	Aminomethyltransferase, mitochondrial (EC 2.1.2.10) (Glycine cleavage system T protein) (GCVT)	0	0	0	0
Q9UGP8	Translocation protein SEC63 homolog	0	0	0	0
Q15370	Elongin-B (EloB) (Elongin 18 kDa subunit) (RNA polymerase II transcription factor SIII subunit B) (SIII p18) (Transcription elongation factor B polypeptide 2)	0	0	0	0
O95169	NADH dehydrogenase [ubiquinone] 1 beta subcomplex subunit 8, mitochondrial (Complex I-ASHI) (CI-ASHI) (NADH-ubiquinone oxidoreductase ASHI subunit)	0	0	0	0
Q96A26	Protein FAM162A (E2-induced gene 5 protein) (Growth and transformation-dependent protein) (HGTD-P)	0	0	0	Yes
P50897	Palmitoyl-protein thioesterase 1 (PPT-1) (EC 3.1.2.22) (Palmitoyl-protein hydrolase 1)	0	0	Yes	0
P22059	Oxysterol-binding protein 1	0	0	0	0
P12270	Nucleoprotein TPR (Megator) (NPC-associated intranuclear protein) (Translocated promoter region protein)	0	0	0	0
P19835	Bile salt-activated lipase (BAL) (EC 3.1.1.13) (EC 3.1.1.3) (EC 3.1.1.6) (Bile salt-stimulated lipase) (BSSL) (Bucelipase) (Carboxyl ester lipase) (Cholesterol esterase) (Pancreatic lysophospholipase) (Sterol esterase)	0	0	Yes	0
O75955	Flotillin-1	0	0	0	0
P53396	ATP-citrate synthase (EC 2.3.3.8) (ATP-citrate (pro-S-)-lyase) (ACL) (Citrate cleavage enzyme)	0	0	0	0
P25786	Proteasome subunit alpha type-1 (30 kDa prosomal protein) (PROS-30) (Macropain subunit C2) (Multicatalytic endopeptidase complex subunit C2) (Proteasome component C2) (Proteasome nu chain)	0	0	0	0
P20618	Proteasome subunit beta type-1 (Macropain subunit C5) (Multicatalytic endopeptidase complex subunit C5) (Proteasome component C5) (Proteasome gamma chain)	0	0	0	0
O94925	Glutaminase kidney isoform, mitochondrial (GLS) (EC 3.5.1.2) (K-glutaminase) (L-glutamine amidohydrolase) [Cleaved into: Glutaminase kidney isoform, mitochondrial 68 kDa chain; Glutaminase kidney isoform, mitochondrial 65 kDa chain]	0	0	0	0
Q9BPX5	Actin-related protein 2/3 complex subunit 5-like protein (Arp2/3 complex 16 kDa subunit 2) (ARC16-2)	0	0	0	0
Q6UXG2	Endosome/lysosome-associated apoptosis and autophagy regulator 1 (Estrogen-induced gene 121 protein)	0	0	Yes	0
Q9NYU2	UDP-glucose:glycoprotein glucosyltransferase 1 (UGT1) (hUGT1) (EC 2.4.1.-) (UDP--Glc:glycoprotein glucosyltransferase) (UDP-glucose ceramide glucosyltransferase-like 1)	0	0	0	0
Q15063	Periostin (PN) (Osteoblast-specific factor 2) (OSF-2)	Yes	ECM glycoproteins	Yes	0
Q9NP81	Serine--tRNA ligase, mitochondrial (EC 6.1.1.11) (SerRSmt) (Seryl-tRNA synthetase) (SerRS) (Seryl-tRNA(Ser/Sec) synthetase)	0	0	0	0
P41091	Eukaryotic translation initiation factor 2 subunit 3 (EC 3.6.5.3) (Eukaryotic translation initiation factor 2 subunit gamma X) (eIF-2-gamma X) (eIF-2gX)	0	0	0	0
O75390	Citrate synthase, mitochondrial (EC 2.3.3.1) (Citrate (Si)-synthase)	0	0	0	0
P53007	Tricarboxylate transport protein, mitochondrial (Citrate transport protein) (CTP) (Solute carrier family 25 member 1) (Tricarboxylate carrier protein)	0	0	0	0
Q9GZS3	WD repeat-containing protein 61 (Meiotic recombination REC14 protein homolog) (SKI8 homolog) (Ski8) [Cleaved into: WD repeat-containing protein 61, N-terminally processed]	0	0	0	0
Q8NC56	LEM domain-containing protein 2 (hLEM2)	0	0	0	0
P11766	Alcohol dehydrogenase class-3 (EC 1.1.1.1) (Alcohol dehydrogenase 5) (Alcohol dehydrogenase class chi chain) (Alcohol dehydrogenase class-III) (Glutathione-dependent formaldehyde dehydrogenase) (FALDH) (FDH) (GSH-FDH) (EC 1.1.1.-) (S-(hydroxymethyl)glutathione dehydrogenase) (EC 1.1.1.284)	0	0	0	0
P48739	Phosphatidylinositol transfer protein beta isoform (PI-TP-beta) (PtdIns transfer protein beta) (PtdInsTP beta)	0	0	0	0
O43598	2'-deoxynucleoside 5'-phosphate N-hydrolase 1 (EC 3.2.2.-) (c-Myc-responsive protein RCL)	0	0	0	0
O60832	H/ACA ribonucleoprotein complex subunit DKC1 (EC 5.4.99.-) (CBF5 homolog) (Dyskerin) (Nopp140-associated protein of 57 kDa) (Nucleolar protein NAP57) (Nucleolar protein family A member 4) (snoRNP protein DKC1)	0	0	0	0
P23786	Carnitine O-palmitoyltransferase 2, mitochondrial (EC 2.3.1.21) (Carnitine palmitoyltransferase II) (CPT II)	0	0	0	0
P04264	Keratin, type II cytoskeletal 1 (67 kDa cytokeratin) (Cytokeratin-1) (CK-1) (Hair alpha protein) (Keratin-1) (K1) (Type-II keratin Kb1)	0	0	0	0
Q53GQ0	Very-long-chain 3-oxoacyl-CoA reductase (EC 1.1.1.330) (17-beta-hydroxysteroid dehydrogenase 12) (17-beta-HSD 12) (3-ketoacyl-CoA reductase) (KAR) (Estradiol 17-beta-dehydrogenase 12) (EC 1.1.1.62) (Short chain dehydrogenase/reductase family 12C member 1)	0	0	0	0
Q7Z406	Myosin-14 (Myosin heavy chain 14) (Myosin heavy chain, non-muscle IIc) (Non-muscle myosin heavy chain IIc) (NMHC II-C)	0	0	0	0
P30084	Enoyl-CoA hydratase, mitochondrial (EC 4.2.1.17) (Enoyl-CoA hydratase 1) (Short-chain enoyl-CoA hydratase) (SCEH)	0	0	0	0
P50914	60S ribosomal protein L14 (CAG-ISL 7) (Large ribosomal subunit protein eL14)	0	0	0	0
Q12874	Splicing factor 3A subunit 3 (SF3a60) (Spliceosome-associated protein 61) (SAP 61)	0	0	0	0
P47755	F-actin-capping protein subunit alpha-2 (CapZ alpha-2)	0	0	0	0
Q12931	Heat shock protein 75 kDa, mitochondrial (HSP 75) (TNFR-associated protein 1) (Tumor necrosis factor type 1 receptor-associated protein) (TRAP-1)	0	0	0	0
P12956	X-ray repair cross-complementing protein 6 (EC 3.6.4.-) (EC 4.2.99.-) (5'-deoxyribose-5-phosphate lyase Ku70) (5'-dRP lyase Ku70) (70 kDa subunit of Ku antigen) (ATP-dependent DNA helicase 2 subunit 1) (ATP-dependent DNA helicase II 70 kDa subunit) (CTC box-binding factor 75 kDa subunit) (CTC75) (CTCBF) (DNA repair protein XRCC6) (Lupus Ku autoantigen protein p70) (Ku70) (Thyroid-lupus autoantige…	0	0	Yes	0
P00167	Cytochrome b5 (Microsomal cytochrome b5 type A) (MCB5)	0	0	0	0
Q7L2H7	Eukaryotic translation initiation factor 3 subunit M (eIF3m) (Fetal lung protein B5) (hFL-B5) (PCI domain-containing protein 1)	0	0	0	0
Q9UJZ1	Stomatin-like protein 2, mitochondrial (SLP-2) (EPB72-like protein 2) (Paraprotein target 7) (Paratarg-7)	0	0	0	0
P58546	Myotrophin (Protein V-1)	0	0	0	0
P25787	Proteasome subunit alpha type-2 (Macropain subunit C3) (Multicatalytic endopeptidase complex subunit C3) (Proteasome component C3)	0	0	0	0
P31942	Heterogeneous nuclear ribonucleoprotein H3 (hnRNP H3) (Heterogeneous nuclear ribonucleoprotein 2H9) (hnRNP 2H9)	0	0	0	0
Q9GZZ1	N-alpha-acetyltransferase 50 (hNaa50p) (EC 2.3.1.258) (N-acetyltransferase 13) (N-acetyltransferase 5) (hNAT5) (N-acetyltransferase san homolog) (hSAN) (N-epsilon-acetyltransferase 50) (EC 2.3.1.-) (NatE catalytic subunit)	0	0	0	0
Q14254	Flotillin-2 (Epidermal surface antigen) (ESA) (Membrane component chromosome 17 surface marker 1)	0	0	0	0
P46940	Ras GTPase-activating-like protein IQGAP1 (p195)	0	0	0	0
Q969Q0	60S ribosomal protein L36a-like (Large ribosomal subunit protein eL42-like)	0	0	0	0
O43920	NADH dehydrogenase [ubiquinone] iron-sulfur protein 5 (Complex I-15 kDa) (CI-15 kDa) (NADH-ubiquinone oxidoreductase 15 kDa subunit)	0	0	0	0
Q9Y512	Sorting and assembly machinery component 50 homolog (Transformation-related gene 3 protein) (TRG-3)	0	0	0	0
Q13228	Methanethiol oxidase (MTO) (EC 1.8.3.4) (56 kDa selenium-binding protein) (SBP56) (SP56) (Selenium-binding protein 1)	0	0	0	0
P10768	S-formylglutathione hydrolase (FGH) (EC 3.1.2.12) (Esterase D) (Methylumbelliferyl-acetate deacetylase) (EC 3.1.1.56)	0	0	0	0
Q9Y2B0	Protein canopy homolog 2 (MIR-interacting saposin-like protein) (Putative secreted protein Zsig9) (Transmembrane protein 4)	0	0	0	0
P30153	Serine/threonine-protein phosphatase 2A 65 kDa regulatory subunit A alpha isoform (Medium tumor antigen-associated 61 kDa protein) (PP2A subunit A isoform PR65-alpha) (PP2A subunit A isoform R1-alpha)	0	0	0	0
Q16363	Laminin subunit alpha-4 (Laminin-14 subunit alpha) (Laminin-8 subunit alpha) (Laminin-9 subunit alpha)	Yes	ECM glycoproteins	Yes	0
P67775	Serine/threonine-protein phosphatase 2A catalytic subunit alpha isoform (PP2A-alpha) (EC 3.1.3.16) (Replication protein C) (RP-C)	0	0	0	0
O96000	NADH dehydrogenase [ubiquinone] 1 beta subcomplex subunit 10 (Complex I-PDSW) (CI-PDSW) (NADH-ubiquinone oxidoreductase PDSW subunit)	0	0	0	0
P26640	Valine--tRNA ligase (EC 6.1.1.9) (Protein G7a) (Valyl-tRNA synthetase) (ValRS)	0	0	Yes	0
P59998	Actin-related protein 2/3 complex subunit 4 (Arp2/3 complex 20 kDa subunit) (p20-ARC)	0	0	0	0
Q56VL3	OCIA domain-containing protein 2 (Ovarian carcinoma immunoreactive antigen-like protein)	0	0	0	0
Q06141	Regenerating islet-derived protein 3-alpha (REG-3-alpha) (Hepatointestinal pancreatic protein) (HIP/PAP) (Human proislet peptide) (Pancreatitis-associated protein 1) (Regenerating islet-derived protein III-alpha) (Reg III-alpha) [Cleaved into: Regenerating islet-derived protein 3-alpha 16.5 kDa form; Regenerating islet-derived protein 3-alpha 15 kDa form]	Yes	ECM-affiliated proteins	0	0
P56192	Methionine--tRNA ligase, cytoplasmic (EC 6.1.1.10) (Methionyl-tRNA synthetase) (MetRS)	0	0	0	0
P46063	ATP-dependent DNA helicase Q1 (EC 3.6.4.12) (DNA helicase, RecQ-like type 1) (RecQ1) (DNA-dependent ATPase Q1) (RecQ protein-like 1)	0	0	0	0
P84098	60S ribosomal protein L19 (Large ribosomal subunit protein eL19)	0	0	0	0
Q9H299	SH3 domain-binding glutamic acid-rich-like protein 3 (SH3 domain-binding protein 1) (SH3BP-1)	0	0	0	0
O75251	NADH dehydrogenase [ubiquinone] iron-sulfur protein 7, mitochondrial (EC 7.1.1.2) (Complex I-20kD) (CI-20kD) (NADH-ubiquinone oxidoreductase 20 kDa subunit) (PSST subunit)	0	0	0	0
P31153	S-adenosylmethionine synthase isoform type-2 (AdoMet synthase 2) (EC 2.5.1.6) (Methionine adenosyltransferase 2) (MAT 2) (Methionine adenosyltransferase II) (MAT-II)	0	0	0	0
P15170	Eukaryotic peptide chain release factor GTP-binding subunit ERF3A (Eukaryotic peptide chain release factor subunit 3a) (eRF3a) (G1 to S phase transition protein 1 homolog)	0	0	0	0
P56378	ATP synthase subunit ATP5MPL, mitochondrial (6.8 kDa mitochondrial proteolipid protein) (MLQ) (ATP synthase membrane subunit 6.8PL)	0	0	0	0
P36776	Lon protease homolog, mitochondrial (EC 3.4.21.53) (LONHs) (Lon protease-like protein) (LONP) (Mitochondrial ATP-dependent protease Lon) (Serine protease 15)	0	0	0	0
P46779	60S ribosomal protein L28 (Large ribosomal subunit protein eL28)	0	0	0	0
P60953	Cell division control protein 42 homolog (EC 3.6.5.2) (G25K GTP-binding protein)	0	0	0	0
Q8NBS9	Thioredoxin domain-containing protein 5 (Endoplasmic reticulum resident protein 46) (ER protein 46) (ERp46) (Thioredoxin-like protein p46)	0	0	0	0
O75821	Eukaryotic translation initiation factor 3 subunit G (eIF3g) (Eukaryotic translation initiation factor 3 RNA-binding subunit) (eIF-3 RNA-binding subunit) (Eukaryotic translation initiation factor 3 subunit 4) (eIF-3-delta) (eIF3 p42) (eIF3 p44)	0	0	0	0
P61966	AP-1 complex subunit sigma-1A (Adaptor protein complex AP-1 subunit sigma-1A) (Adaptor-related protein complex 1 subunit sigma-1A) (Clathrin assembly protein complex 1 sigma-1A small chain) (Clathrin coat assembly protein AP19) (Golgi adaptor HA1/AP1 adaptin sigma-1A subunit) (HA1 19 kDa subunit) (Sigma 1a subunit of AP-1 clathrin) (Sigma-adaptin 1A) (Sigma1A-adaptin)	0	0	0	0
P35030	Trypsin-3 (EC 3.4.21.4) (Brain trypsinogen) (Mesotrypsin) (Mesotrypsinogen) (Serine protease 3) (Serine protease 4) (Trypsin III) (Trypsin IV)	Yes	ECM regulators	0	0
P02792	Ferritin light chain (Ferritin L subunit)	0	0	0	0
O94875	Sorbin and SH3 domain-containing protein 2 (Arg-binding protein 2) (ArgBP2) (Arg/Abl-interacting protein 2) (Sorbin)	0	0	0	Yes
P26639	Threonine--tRNA ligase 1, cytoplasmic (EC 6.1.1.3) (Threonyl-tRNA synthetase) (ThrRS) (Threonyl-tRNA synthetase 1)	0	0	0	0
P09543	2',3'-cyclic-nucleotide 3'-phosphodiesterase (CNP) (CNPase) (EC 3.1.4.37)	0	0	0	0
P51659	Peroxisomal multifunctional enzyme type 2 (MFE-2) (17-beta-hydroxysteroid dehydrogenase 4) (17-beta-HSD 4) (D-bifunctional protein) (DBP) (Multifunctional protein 2) (MFP-2) (Short chain dehydrogenase/reductase family 8C member 1) [Cleaved into: (3R)-hydroxyacyl-CoA dehydrogenase (EC 1.1.1.n12); Enoyl-CoA hydratase 2 (EC 4.2.1.107) (EC 4.2.1.119) (3-alpha,7-alpha,12-alpha-trihydroxy-5-beta-choles…	0	0	0	0
Q9P2J5	Leucine--tRNA ligase, cytoplasmic (EC 6.1.1.4) (Leucyl-tRNA synthetase) (LeuRS)	0	0	0	0
Q01081	Splicing factor U2AF 35 kDa subunit (U2 auxiliary factor 35 kDa subunit) (U2 small nuclear RNA auxiliary factor 1) (U2 snRNP auxiliary factor small subunit)	0	0	0	0
Q15691	Microtubule-associated protein RP/EB family member 1 (APC-binding protein EB1) (End-binding protein 1) (EB1)	0	0	0	0
P54709	Sodium/potassium-transporting ATPase subunit beta-3 (Sodium/potassium-dependent ATPase subunit beta-3) (ATPB-3) (CD antigen CD298)	0	0	0	0
P53582	Methionine aminopeptidase 1 (MAP 1) (MetAP 1) (EC 3.4.11.18) (Peptidase M 1)	0	0	0	0
P99999	Cytochrome c	0	0	0	0
P36269	Glutathione hydrolase 5 proenzyme (EC 3.4.19.13) (Gamma-glutamyl transpeptidase-related enzyme) (GGT-rel) (Gamma-glutamyltransferase 5) (GGT 5) (EC 2.3.2.2) (Gamma-glutamyltransferase-like activity 1) (Gamma-glutamyltranspeptidase 5) (Leukotriene-C4 hydrolase) (EC 3.4.19.14) [Cleaved into: Glutathione hydrolase 5 heavy chain; Glutathione hydrolase 5 light chain]	0	0	Yes	0
Q06136	3-ketodihydrosphingosine reductase (KDS reductase) (EC 1.1.1.102) (3-dehydrosphinganine reductase) (Follicular variant translocation protein 1) (FVT-1) (Short chain dehydrogenase/reductase family 35C member 1)	0	0	0	0
P16989	Y-box-binding protein 3 (Cold shock domain-containing protein A) (DNA-binding protein A) (Single-strand DNA-binding protein NF-GMB)	0	0	0	Yes
P54578	Ubiquitin carboxyl-terminal hydrolase 14 (EC 3.4.19.12) (Deubiquitinating enzyme 14) (Ubiquitin thioesterase 14) (Ubiquitin-specific-processing protease 14)	0	0	0	0
Q00059	Transcription factor A, mitochondrial (mtTFA) (Mitochondrial transcription factor 1) (MtTF1) (Transcription factor 6) (TCF-6) (Transcription factor 6-like 2)	0	0	0	0
Q9NUQ7	Ufm1-specific protease 2 (UfSP2) (EC 3.4.22.-)	0	0	0	0
P12081	Histidine--tRNA ligase, cytoplasmic (EC 6.1.1.21) (Histidyl-tRNA synthetase) (HisRS)	0	0	0	0
Q9Y673	Dolichyl-phosphate beta-glucosyltransferase (DolP-glucosyltransferase) (EC 2.4.1.117) (Asparagine-linked glycosylation protein 5 homolog)	0	0	0	0
Q86Y39	NADH dehydrogenase [ubiquinone] 1 alpha subcomplex subunit 11 (Complex I-B14.7) (CI-B14.7) (NADH-ubiquinone oxidoreductase subunit B14.7)	0	0	0	0
Q00325	Phosphate carrier protein, mitochondrial (Phosphate transport protein) (PTP) (Solute carrier family 25 member 3)	0	0	0	0
O60763	General vesicular transport factor p115 (Protein USO1 homolog) (Transcytosis-associated protein) (TAP) (Vesicle-docking protein)	0	0	0	0
P49755	Transmembrane emp24 domain-containing protein 10 (Protein TMED10) (21 kDa transmembrane-trafficking protein) (S31I125) (S31III125) (Tmp-21-I) (Transmembrane protein Tmp21) (p23) (p24 family protein delta-1) (p24delta1) (p24delta)	0	0	0	0
Q6UW15	Regenerating islet-derived protein 3-gamma (REG-3-gamma) (Pancreatitis-associated protein 1B) (PAP-1B) (Pancreatitis-associated protein IB) (PAP IB) (Regenerating islet-derived protein III-gamma) (REG III) (Reg III-gamma) [Cleaved into: Regenerating islet-derived protein 3-gamma 16.5 kDa form; Regenerating islet-derived protein 3-gamma 15 kDa form]	Yes	ECM-affiliated proteins	0	0
Q16718	NADH dehydrogenase [ubiquinone] 1 alpha subcomplex subunit 5 (Complex I subunit B13) (Complex I-13kD-B) (CI-13kD-B) (NADH-ubiquinone oxidoreductase 13 kDa-B subunit)	0	0	0	0
P51808	Dynein light chain Tctex-type 3 (Protein 91/23) (T-complex-associated testis-expressed 1-like)	0	0	0	0
P68036	Ubiquitin-conjugating enzyme E2 L3 (EC 2.3.2.23) (E2 ubiquitin-conjugating enzyme L3) (L-UBC) (UbcH7) (Ubiquitin carrier protein L3) (Ubiquitin-conjugating enzyme E2-F1) (Ubiquitin-protein ligase L3)	0	0	0	0
O00231	26S proteasome non-ATPase regulatory subunit 11 (26S proteasome regulatory subunit RPN6) (26S proteasome regulatory subunit S9) (26S proteasome regulatory subunit p44.5)	0	0	0	0
P46977	Dolichyl-diphosphooligosaccharide--protein glycosyltransferase subunit STT3A (Oligosaccharyl transferase subunit STT3A) (STT3-A) (EC 2.4.99.18) (B5) (Integral membrane protein 1) (Transmembrane protein TMC)	0	0	Yes	0
Q9UFN0	Protein NipSnap homolog 3A (NipSnap3A) (Protein NipSnap homolog 4) (NipSnap4) (Target for Salmonella secreted protein C) (TassC)	0	0	0	0
Q14126	Desmoglein-2 (Cadherin family member 5) (HDGC)	0	0	0	0
Q8NE62	Choline dehydrogenase, mitochondrial (CDH) (CHD) (EC 1.1.99.1)	0	0	0	0
Q9NP61	ADP-ribosylation factor GTPase-activating protein 3 (ARF GAP 3)	0	0	Yes	0
O95168	NADH dehydrogenase [ubiquinone] 1 beta subcomplex subunit 4 (Complex I-B15) (CI-B15) (NADH-ubiquinone oxidoreductase B15 subunit)	0	0	Yes	0
Q8N4T8	Carbonyl reductase family member 4 (EC 1.-.-.-) (3-ketoacyl-[acyl-carrier-protein] reductase beta subunit) (KAR beta subunit) (3-oxoacyl-[acyl-carrier-protein] reductase) (EC 1.1.1.-) (Quinone reductase CBR4) (Short chain dehydrogenase/reductase family 45C member 1)	0	0	0	0
Q9UBQ7	Glyoxylate reductase/hydroxypyruvate reductase (EC 1.1.1.79) (EC 1.1.1.81)	0	0	0	0
P01008	Antithrombin-III (ATIII) (Serpin C1)	Yes	ECM regulators	Yes	0
P83881	60S ribosomal protein L36a (60S ribosomal protein L44) (Cell growth-inhibiting gene 15 protein) (Cell migration-inducing gene 6 protein) (Large ribosomal subunit protein eL42)	0	0	0	0
P31946	14-3-3 protein beta/alpha (Protein 1054) (Protein kinase C inhibitor protein 1) (KCIP-1) [Cleaved into: 14-3-3 protein beta/alpha, N-terminally processed]	0	0	0	0
P43686	26S proteasome regulatory subunit 6B (26S proteasome AAA-ATPase subunit RPT3) (MB67-interacting protein) (MIP224) (Proteasome 26S subunit ATPase 4) (Tat-binding protein 7) (TBP-7)	0	0	0	0
Q13418	Integrin-linked protein kinase (EC 2.7.11.1) (59 kDa serine/threonine-protein kinase) (Beta-integrin-linked kinase) (ILK-1) (ILK-2) (p59ILK)	0	0	0	0
Q9BUP3	Oxidoreductase HTATIP2 (EC 1.1.1.-) (30 kDa HIV-1 TAT-interacting protein) (HIV-1 TAT-interactive protein 2)	0	0	0	0
P20290	Transcription factor BTF3 (Nascent polypeptide-associated complex subunit beta) (NAC-beta) (RNA polymerase B transcription factor 3)	0	0	0	0
P49591	Serine--tRNA ligase, cytoplasmic (EC 6.1.1.11) (Seryl-tRNA synthetase) (SerRS) (Seryl-tRNA(Ser/Sec) synthetase)	0	0	0	0
P07384	Calpain-1 catalytic subunit (EC 3.4.22.52) (Calcium-activated neutral proteinase 1) (CANP 1) (Calpain mu-type) (Calpain-1 large subunit) (Cell proliferation-inducing gene 30 protein) (Micromolar-calpain) (muCANP)	0	0	0	0
P30837	Aldehyde dehydrogenase X, mitochondrial (EC 1.2.1.3) (Aldehyde dehydrogenase 5) (Aldehyde dehydrogenase family 1 member B1)	0	0	0	0
Q8N1G4	Leucine-rich repeat-containing protein 47	0	0	0	0
P50213	Isocitrate dehydrogenase [NAD] subunit alpha, mitochondrial (EC 1.1.1.41) (Isocitric dehydrogenase subunit alpha) (NAD(+)-specific ICDH subunit alpha)	0	0	0	0
P10253	Lysosomal alpha-glucosidase (EC 3.2.1.20) (Acid maltase) (Aglucosidase alfa) [Cleaved into: 76 kDa lysosomal alpha-glucosidase; 70 kDa lysosomal alpha-glucosidase]	0	0	Yes	0
Q8N4P3	Guanosine-3',5'-bis(diphosphate) 3'-pyrophosphohydrolase MESH1 (EC 3.1.7.2) (HD domain-containing protein 3) (Metazoan SpoT homolog 1) (MESH1) (Penta-phosphate guanosine-3'-pyrophosphohydrolase) ((ppGpp)ase)	0	0	0	0
Q86TX2	Acyl-coenzyme A thioesterase 1 (Acyl-CoA thioesterase 1) (EC 3.1.2.-) (CTE-I) (CTE-Ib) (Inducible cytosolic acyl-coenzyme A thioester hydrolase) (Long chain acyl-CoA thioester hydrolase) (Long chain acyl-CoA hydrolase) (Palmitoyl-coenzyme A thioesterase) (EC 3.1.2.2)	0	0	0	0
Q96A33	Coiled-coil domain-containing protein 47 (Calumin)	0	0	0	0
O43390	Heterogeneous nuclear ribonucleoprotein R (hnRNP R)	0	0	0	0
Q9BTV4	Transmembrane protein 43 (Protein LUMA)	0	0	0	0
P12429	Annexin A3 (35-alpha calcimedin) (Annexin III) (Annexin-3) (Inositol 1,2-cyclic phosphate 2-phosphohydrolase) (Lipocortin III) (Placental anticoagulant protein III) (PAP-III)	Yes	ECM-affiliated proteins	0	0
Q14247	Src substrate cortactin (Amplaxin) (Oncogene EMS1)	0	0	0	0
Q07960	Rho GTPase-activating protein 1 (CDC42 GTPase-activating protein) (GTPase-activating protein rhoGAP) (Rho-related small GTPase protein activator) (Rho-type GTPase-activating protein 1) (p50-RhoGAP)	0	0	0	0
Q13423	NAD(P) transhydrogenase, mitochondrial (EC 7.1.1.1) (Nicotinamide nucleotide transhydrogenase) (Pyridine nucleotide transhydrogenase)	0	0	0	0
Q16851	UTP--glucose-1-phosphate uridylyltransferase (EC 2.7.7.9) (UDP-glucose pyrophosphorylase) (UDPGP) (UGPase)	0	0	0	0
Q9UBS4	DnaJ homolog subfamily B member 11 (APOBEC1-binding protein 2) (ABBP-2) (DnaJ protein homolog 9) (ER-associated DNAJ) (ER-associated Hsp40 co-chaperone) (Endoplasmic reticulum DNA J domain-containing protein 3) (ER-resident protein ERdj3) (ERdj3) (ERj3p) (HEDJ) (Human DnaJ protein 9) (hDj-9) (PWP1-interacting protein 4)	0	0	0	0
P63208	S-phase kinase-associated protein 1 (Cyclin-A/CDK2-associated protein p19) (p19A) (Organ of Corti protein 2) (OCP-2) (Organ of Corti protein II) (OCP-II) (RNA polymerase II elongation factor-like protein) (SIII) (Transcription elongation factor B polypeptide 1-like) (p19skp1)	0	0	0	0
O75489	NADH dehydrogenase [ubiquinone] iron-sulfur protein 3, mitochondrial (EC 7.1.1.2) (Complex I-30kD) (CI-30kD) (NADH-ubiquinone oxidoreductase 30 kDa subunit)	0	0	0	0
P49189	4-trimethylaminobutyraldehyde dehydrogenase (TMABA-DH) (TMABALDH) (EC 1.2.1.47) (Aldehyde dehydrogenase E3 isozyme) (Aldehyde dehydrogenase family 9 member A1) (EC 1.2.1.3) (Gamma-aminobutyraldehyde dehydrogenase) (EC 1.2.1.19) (R-aminobutyraldehyde dehydrogenase) [Cleaved into: 4-trimethylaminobutyraldehyde dehydrogenase, N-terminally processed]	0	0	0	0
Q08379	Golgin subfamily A member 2 (130 kDa cis-Golgi matrix protein) (GM130) (GM130 autoantigen) (Golgin-95)	0	0	0	0
Q13190	Syntaxin-5	0	0	0	0
P22748	Carbonic anhydrase 4 (EC 4.2.1.1) (Carbonate dehydratase IV) (Carbonic anhydrase IV) (CA-IV)	0	0	0	0
Q15651	High mobility group nucleosome-binding domain-containing protein 3 (Thyroid receptor-interacting protein 7) (TR-interacting protein 7) (TRIP-7)	0	0	0	Yes
P0C7P0	CDGSH iron-sulfur domain-containing protein 3, mitochondrial (MitoNEET-related protein 2) (Miner2) (Mitochondrial inner NEET protein) (MiNT)	0	0	0	0
P13645	Keratin, type I cytoskeletal 10 (Cytokeratin-10) (CK-10) (Keratin-10) (K10)	0	0	0	0
Q9HD33	39S ribosomal protein L47, mitochondrial (L47mt) (MRP-L47) (Mitochondrial large ribosomal subunit protein uL29m) (Nasopharyngeal carcinoma metastasis-related protein 1)	0	0	0	0
O76038	Secretagogin	0	0	0	0
P62857	40S ribosomal protein S28 (Small ribosomal subunit protein eS28)	0	0	0	0
P51572	B-cell receptor-associated protein 31 (BCR-associated protein 31) (Bap31) (6C6-AG tumor-associated antigen) (Protein CDM) (p28)	0	0	0	0
O15372	Eukaryotic translation initiation factor 3 subunit H (eIF3h) (Eukaryotic translation initiation factor 3 subunit 3) (eIF-3-gamma) (eIF3 p40 subunit)	0	0	0	0
Q15366	Poly(rC)-binding protein 2 (Alpha-CP2) (Heterogeneous nuclear ribonucleoprotein E2) (hnRNP E2)	0	0	0	0
Q9NZ45	CDGSH iron-sulfur domain-containing protein 1 (MitoNEET)	0	0	0	0
O43837	Isocitrate dehydrogenase [NAD] subunit beta, mitochondrial (Isocitric dehydrogenase subunit beta) (NAD(+)-specific ICDH subunit beta)	0	0	0	0
Q04760	Lactoylglutathione lyase (EC 4.4.1.5) (Aldoketomutase) (Glyoxalase I) (Glx I) (Ketone-aldehyde mutase) (Methylglyoxalase) (S-D-lactoylglutathione methylglyoxal lyase)	0	0	0	0
Q96CT7	Coiled-coil domain-containing protein 124	0	0	0	0
P49959	Double-strand break repair protein MRE11 (EC 3.1.-.-) (Double-strand break repair protein MRE11A) (Meiotic recombination 11 homolog 1) (MRE11 homolog 1) (Meiotic recombination 11 homolog A) (MRE11 homolog A)	0	0	0	0
Q15661	Tryptase alpha/beta-1 (Tryptase-1) (EC 3.4.21.59) (Tryptase I) (Tryptase alpha-1)	0	0	Yes	0
Q8NCW5	NAD(P)H-hydrate epimerase (EC 5.1.99.6) (Apolipoprotein A-I-binding protein) (AI-BP) (NAD(P)HX epimerase) (YjeF N-terminal domain-containing protein 1) (YjeF_N1)	0	0	0	0
P20340	Ras-related protein Rab-6A (Rab-6)	0	0	0	0
P40227	T-complex protein 1 subunit zeta (TCP-1-zeta) (Acute morphine dependence-related protein 2) (CCT-zeta-1) (HTR3) (Tcp20)	0	0	0	0
P28482	Mitogen-activated protein kinase 1 (MAP kinase 1) (MAPK 1) (EC 2.7.11.24) (ERT1) (Extracellular signal-regulated kinase 2) (ERK-2) (MAP kinase isoform p42) (p42-MAPK) (Mitogen-activated protein kinase 2) (MAP kinase 2) (MAPK 2)	0	0	0	0
Q6P2Q9	Pre-mRNA-processing-splicing factor 8 (220 kDa U5 snRNP-specific protein) (PRP8 homolog) (Splicing factor Prp8) (p220)	0	0	Yes	0
O75340	Programmed cell death protein 6 (Apoptosis-linked gene 2 protein homolog) (ALG-2)	0	0	0	0
Q15046	Lysine--tRNA ligase (EC 2.7.7.-) (EC 6.1.1.6) (Lysyl-tRNA synthetase) (LysRS)	0	0	0	0
Q9NVI7	ATPase family AAA domain-containing protein 3A	0	0	0	0
Q6PI48	Aspartate--tRNA ligase, mitochondrial (EC 6.1.1.12) (Aspartyl-tRNA synthetase) (AspRS)	0	0	0	0
O43493	Trans-Golgi network integral membrane protein 2 (Trans-Golgi network glycoprotein 46) (TGN38 homolog) (hTGN46) (Trans-Golgi network glycoprotein 48) (hTGN48) (Trans-Golgi network glycoprotein 51) (hTGN51) (Trans-Golgi network protein 2)	0	0	Yes	0
O43776	Asparagine--tRNA ligase, cytoplasmic (EC 6.1.1.22) (Asparaginyl-tRNA synthetase) (AsnRS) (Asparaginyl-tRNA synthetase 1)	0	0	0	0
P20073	Annexin A7 (Annexin VII) (Annexin-7) (Synexin)	Yes	ECM-affiliated proteins	0	0
Q13185	Chromobox protein homolog 3 (HECH) (Heterochromatin protein 1 homolog gamma) (HP1 gamma) (Modifier 2 protein)	0	0	0	0
Q6NZI2	Caveolae-associated protein 1 (Cavin-1) (Polymerase I and transcript release factor)	0	0	0	0
P22830	Ferrochelatase, mitochondrial (EC 4.99.1.1) (Heme synthase) (Protoheme ferro-lyase)	0	0	0	0
P09132	Signal recognition particle 19 kDa protein (SRP19)	0	0	0	0
Q8IVN8	Somatomedin-B and thrombospondin type-1 domain-containing protein (RPE-spondin)	Yes	ECM glycoproteins	Yes	0
Q9Y3E1	Hepatoma-derived growth factor-related protein 3 (HRP-3) (Hepatoma-derived growth factor 2) (HDGF-2)	0	0	0	0
Q5HYI8	Rab-like protein 3	0	0	0	0
P02743	Serum amyloid P-component (SAP) (9.5S alpha-1-glycoprotein) [Cleaved into: Serum amyloid P-component(1-203)]	0	0	Yes	0
P35611	Alpha-adducin (Erythrocyte adducin subunit alpha)	0	0	0	Yes
O94832	Unconventional myosin-Id	0	0	Yes	0
P27348	14-3-3 protein theta (14-3-3 protein T-cell) (14-3-3 protein tau) (Protein HS1)	0	0	0	0
Q9Y4W6	AFG3-like protein 2 (EC 3.4.24.-) (Paraplegin-like protein)	0	0	0	0
Q8NBJ4	Golgi membrane protein 1 (Golgi membrane protein GP73) (Golgi phosphoprotein 2)	0	0	Yes	0
Q13217	DnaJ homolog subfamily C member 3 (Endoplasmic reticulum DNA J domain-containing protein 6) (ER-resident protein ERdj6) (ERdj6) (Interferon-induced, double-stranded RNA-activated protein kinase inhibitor) (Protein kinase inhibitor of 58 kDa) (Protein kinase inhibitor p58)	0	0	0	0
Q96FQ6	Protein S100-A16 (Aging-associated gene 13 protein) (Protein S100-F) (S100 calcium-binding protein A16)	Yes	Secreted factors	0	0
L0R6Q1	SLC35A4 upstream open reading frame protein	0	0	0	0
P53992	Protein transport protein Sec24C (SEC24-related protein C)	0	0	Yes	0
Q9NZ43	Vesicle transport protein USE1 (Putative MAPK-activating protein PM26) (USE1-like protein) (p31)	0	0	0	0
Q9Y5P6	Mannose-1-phosphate guanyltransferase beta (EC 2.7.7.13) (GDP-mannose pyrophosphorylase B) (GTP-mannose-1-phosphate guanylyltransferase beta)	0	0	0	0
Q00169	Phosphatidylinositol transfer protein alpha isoform (PI-TP-alpha) (PtdIns transfer protein alpha) (PtdInsTP alpha)	0	0	0	0
Q9GZZ9	Ubiquitin-like modifier-activating enzyme 5 (Ubiquitin-activating enzyme 5) (ThiFP1) (UFM1-activating enzyme) (Ubiquitin-activating enzyme E1 domain-containing protein 1)	0	0	0	0
P17026	Zinc finger protein 22 (Zinc finger protein KOX15) (Zinc finger protein Krox-26)	0	0	0	Yes
Q9Y295	Developmentally-regulated GTP-binding protein 1 (DRG-1) (Neural precursor cell expressed developmentally down-regulated protein 3) (NEDD-3) (Translation factor GTPase DRG1) (TRAFAC GTPase DRG1) (EC 3.6.5.-)	0	0	0	0
P01911	HLA class II histocompatibility antigen, DRB1 beta chain (Human leukocyte antigen DRB1) (HLA-DRB1)	0	0	0	0
Q9H4G4	Golgi-associated plant pathogenesis-related protein 1 (GAPR-1) (Golgi-associated PR-1 protein) (Glioma pathogenesis-related protein 2) (GliPR 2)	0	0	0	0
Q5BJF2	Sigma intracellular receptor 2 (Sigma-2 receptor) (Sigma2 receptor) (Meningioma-associated protein 30) (Transmembrane protein 97)	0	0	0	0
Q9C005	Protein dpy-30 homolog (Dpy-30-like protein) (Dpy-30L)	0	0	0	0
P62328	Thymosin beta-4 (T beta-4) (Fx) [Cleaved into: Hematopoietic system regulatory peptide (Seraspenide)]	0	0	0	0
P50238	Cysteine-rich protein 1 (CRP-1) (Cysteine-rich heart protein) (CRHP) (hCRHP) (Cysteine-rich intestinal protein) (CRIP)	0	0	0	0
O95822	Malonyl-CoA decarboxylase, mitochondrial (MCD) (EC 4.1.1.9)	0	0	0	0
Q9BSH5	Haloacid dehalogenase-like hydrolase domain-containing protein 3	0	0	0	0
Q15582	Transforming growth factor-beta-induced protein ig-h3 (Beta ig-h3) (Kerato-epithelin) (RGD-containing collagen-associated protein) (RGD-CAP)	Yes	ECM glycoproteins	0	0
P62826	GTP-binding nuclear protein Ran (Androgen receptor-associated protein 24) (GTPase Ran) (Ras-like protein TC4) (Ras-related nuclear protein)	0	0	0	0
P62942	Peptidyl-prolyl cis-trans isomerase FKBP1A (PPIase FKBP1A) (EC 5.2.1.8) (12 kDa FK506-binding protein) (12 kDa FKBP) (FKBP-12) (Calstabin-1) (FK506-binding protein 1A) (FKBP-1A) (Immunophilin FKBP12) (Rotamase)	0	0	0	0
P19623	Spermidine synthase (SPDSY) (EC 2.5.1.16) (Putrescine aminopropyltransferase)	0	0	0	0
P07305	Histone H1.0 (Histone H1') (Histone H1(0)) [Cleaved into: Histone H1.0, N-terminally processed]	0	0	Yes	0
P01860	Immunoglobulin heavy constant gamma 3 (HDC) (Heavy chain disease protein) (Ig gamma-3 chain C region)	0	0	0	0
O15247	Chloride intracellular channel protein 2 (XAP121)	0	0	0	0
Q13310	Polyadenylate-binding protein 4 (PABP-4) (Poly(A)-binding protein 4) (Activated-platelet protein 1) (APP-1) (Inducible poly(A)-binding protein) (iPABP)	0	0	0	0
Q9H9B4	Sideroflexin-1	0	0	0	0
Q9Y2W1	Thyroid hormone receptor-associated protein 3 (BCLAF1 and THRAP3 family member 2) (Thyroid hormone receptor-associated protein complex 150 kDa component) (Trap150)	0	0	0	Yes
Q9Y266	Nuclear migration protein nudC (Nuclear distribution protein C homolog)	0	0	0	0
P35998	26S proteasome regulatory subunit 7 (26S proteasome AAA-ATPase subunit RPT1) (Proteasome 26S subunit ATPase 2) (Protein MSS1)	0	0	0	0
P34913	Bifunctional epoxide hydrolase 2 [Includes: Cytosolic epoxide hydrolase 2 (CEH) (EC 3.3.2.10) (Epoxide hydratase) (Soluble epoxide hydrolase) (SEH); Lipid-phosphate phosphatase (EC 3.1.3.76)]	0	0	0	0
Q96GK7	Fumarylacetoacetate hydrolase domain-containing protein 2A (EC 3.-.-.-)	0	0	0	0
Q969G5	Caveolae-associated protein 3 (Cavin-3) (Protein kinase C delta-binding protein) (Serum deprivation response factor-related gene product that binds to C-kinase) (hSRBC)	0	0	0	0
Q96CS3	FAS-associated factor 2 (Protein ETEA) (UBX domain-containing protein 3B) (UBX domain-containing protein 8)	0	0	0	0
P41252	Isoleucine--tRNA ligase, cytoplasmic (EC 6.1.1.5) (Isoleucyl-tRNA synthetase) (IRS) (IleRS)	0	0	0	0
Q8NFH5	Nucleoporin NUP35 (35 kDa nucleoporin) (Mitotic phosphoprotein 44) (MP-44) (Nuclear pore complex protein Nup53) (Nucleoporin NUP53)	0	0	0	0
P01859	Immunoglobulin heavy constant gamma 2 (Ig gamma-2 chain C region) (Ig gamma-2 chain C region DOT) (Ig gamma-2 chain C region TIL) (Ig gamma-2 chain C region ZIE)	0	0	Yes	0
P0C0L4	Complement C4-A (Acidic complement C4) (C3 and PZP-like alpha-2-macroglobulin domain-containing protein 2) [Cleaved into: Complement C4 beta chain; Complement C4-A alpha chain; C4a anaphylatoxin; C4b-A; C4d-A; Complement C4 gamma chain]	0	0	Yes	0
Q9UJS0	Calcium-binding mitochondrial carrier protein Aralar2 (Citrin) (Mitochondrial aspartate glutamate carrier 2) (Solute carrier family 25 member 13)	0	0	0	0
Q9NR31	GTP-binding protein SAR1a (COPII-associated small GTPase)	0	0	0	0
P22061	Protein-L-isoaspartate(D-aspartate) O-methyltransferase (PIMT) (EC 2.1.1.77) (L-isoaspartyl protein carboxyl methyltransferase) (Protein L-isoaspartyl/D-aspartyl methyltransferase) (Protein-beta-aspartate methyltransferase)	0	0	0	0
P47985	Cytochrome b-c1 complex subunit Rieske, mitochondrial (EC 7.1.1.8) (Complex III subunit 5) (Cytochrome b-c1 complex subunit 5) (Rieske iron-sulfur protein) (RISP) (Rieske protein UQCRFS1) (Ubiquinol-cytochrome c reductase iron-sulfur subunit) [Cleaved into: Cytochrome b-c1 complex subunit 9 (Su9) (Subunit 9) (8 kDa subunit 9) (Complex III subunit IX) (Cytochrome b-c1 complex subunit 11) (UQCRFS1 …	0	0	0	0
Q9Y376	Calcium-binding protein 39 (MO25alpha) (Protein Mo25)	0	0	0	0
Q96IX5	ATP synthase membrane subunit DAPIT, mitochondrial (Diabetes-associated protein in insulin-sensitive tissues) (HCV F-transactivated protein 2) (Up-regulated during skeletal muscle growth protein 5)	0	0	0	0
P78417	Glutathione S-transferase omega-1 (GSTO-1) (EC 2.5.1.18) (Glutathione S-transferase omega 1-1) (GSTO 1-1) (Glutathione-dependent dehydroascorbate reductase) (EC 1.8.5.1) (Monomethylarsonic acid reductase) (MMA(V) reductase) (EC 1.20.4.2) (S-(Phenacyl)glutathione reductase) (SPG-R)	0	0	0	0
O14773	Tripeptidyl-peptidase 1 (TPP-1) (EC 3.4.14.9) (Cell growth-inhibiting gene 1 protein) (Lysosomal pepstatin-insensitive protease) (LPIC) (Tripeptidyl aminopeptidase) (Tripeptidyl-peptidase I) (TPP-I)	0	0	Yes	0
O96019	Actin-like protein 6A (53 kDa BRG1-associated factor A) (Actin-related protein Baf53a) (ArpNbeta) (BRG1-associated factor 53A) (BAF53A) (INO80 complex subunit K)	0	0	0	0
Q13442	28 kDa heat- and acid-stable phosphoprotein (PDGF-associated protein) (PAP) (PDGFA-associated protein 1) (PAP1)	0	0	0	0
P05362	Intercellular adhesion molecule 1 (ICAM-1) (Major group rhinovirus receptor) (CD antigen CD54)	0	0	Yes	0
O43865	S-adenosylhomocysteine hydrolase-like protein 1 (DC-expressed AHCY-like molecule) (IP(3)Rs binding protein released with IP(3)) (IRBIT) (Putative adenosylhomocysteinase 2) (S-adenosyl-L-homocysteine hydrolase 2) (AdoHcyase 2)	0	0	0	0
Q9BRA2	Thioredoxin domain-containing protein 17 (14 kDa thioredoxin-related protein) (TRP14) (Protein 42-9-9) (Thioredoxin-like protein 5)	0	0	0	0
P16671	Platelet glycoprotein 4 (Fatty acid translocase) (FAT) (Glycoprotein IIIb) (GPIIIB) (Leukocyte differentiation antigen CD36) (PAS IV) (PAS-4) (Platelet collagen receptor) (Platelet glycoprotein IV) (GPIV) (Thrombospondin receptor) (CD antigen CD36)	0	0	Yes	0
P78527	DNA-dependent protein kinase catalytic subunit (DNA-PK catalytic subunit) (DNA-PKcs) (EC 2.7.11.1) (DNPK1) (p460)	0	0	0	0
P62633	Cellular nucleic acid-binding protein (CNBP) (Zinc finger protein 9)	0	0	0	0
O43447	Peptidyl-prolyl cis-trans isomerase H (PPIase H) (EC 5.2.1.8) (Rotamase H) (Small nuclear ribonucleoprotein particle-specific cyclophilin H) (CypH) (U-snRNP-associated cyclophilin SnuCyp-20) (USA-CYP)	0	0	0	0
Q92485	Acid sphingomyelinase-like phosphodiesterase 3b (ASM-like phosphodiesterase 3b) (EC 3.1.4.-)	0	0	Yes	0
Q16890	Tumor protein D53 (hD53) (Tumor protein D52-like 1)	0	0	0	0
Q15942	Zyxin (Zyxin-2)	0	0	0	0
Q52LJ0	Protein FAM98B	0	0	0	0
O43242	26S proteasome non-ATPase regulatory subunit 3 (26S proteasome regulatory subunit RPN3) (26S proteasome regulatory subunit S3) (Proteasome subunit p58)	0	0	0	0
Q96QR8	Transcriptional activator protein Pur-beta (Purine-rich element-binding protein B)	0	0	0	0
P40763	Signal transducer and activator of transcription 3 (Acute-phase response factor)	0	0	0	0
P21399	Cytoplasmic aconitate hydratase (Aconitase) (EC 4.2.1.3) (Citrate hydro-lyase) (Ferritin repressor protein) (Iron regulatory protein 1) (IRP1) (Iron-responsive element-binding protein 1) (IRE-BP 1)	0	0	0	0
O43143	Pre-mRNA-splicing factor ATP-dependent RNA helicase DHX15 (EC 3.6.4.13) (ATP-dependent RNA helicase #46) (DEAH box protein 15)	0	0	0	0
O43237	Cytoplasmic dynein 1 light intermediate chain 2 (Dynein light intermediate chain 2, cytosolic) (LIC-2) (LIC53/55)	0	0	0	0
P01833	Polymeric immunoglobulin receptor (PIgR) (Poly-Ig receptor) (Hepatocellular carcinoma-associated protein TB6) [Cleaved into: Secretory component]	0	0	Yes	0
P60228	Eukaryotic translation initiation factor 3 subunit E (eIF3e) (Eukaryotic translation initiation factor 3 subunit 6) (Viral integration site protein INT-6 homolog) (eIF-3 p48)	0	0	0	0
P35270	Sepiapterin reductase (SPR) (EC 1.1.1.153)	0	0	0	0
Q8NFV4	Protein ABHD11 (EC 3.-.-.-) (Alpha/beta hydrolase domain-containing protein 11) (Abhydrolase domain-containing protein 11) (Williams-Beuren syndrome chromosomal region 21 protein)	0	0	0	0
Q13451	Peptidyl-prolyl cis-trans isomerase FKBP5 (PPIase FKBP5) (EC 5.2.1.8) (51 kDa FK506-binding protein) (51 kDa FKBP) (FKBP-51) (54 kDa progesterone receptor-associated immunophilin) (Androgen-regulated protein 6) (FF1 antigen) (FK506-binding protein 5) (FKBP-5) (FKBP54) (p54) (HSP90-binding immunophilin) (Rotamase)	0	0	0	0
P02790	Hemopexin (Beta-1B-glycoprotein)	Yes	ECM-affiliated proteins	Yes	Yes
Q9NZB2	Constitutive coactivator of PPAR-gamma-like protein 1 (Oxidative stress-associated Src activator) (Protein FAM120A)	0	0	0	0
P51649	Succinate-semialdehyde dehydrogenase, mitochondrial (EC 1.2.1.24) (Aldehyde dehydrogenase family 5 member A1) (NAD(+)-dependent succinic semialdehyde dehydrogenase)	0	0	0	0
P55036	26S proteasome non-ATPase regulatory subunit 4 (26S proteasome regulatory subunit RPN10) (26S proteasome regulatory subunit S5A) (Antisecretory factor 1) (AF) (ASF) (Multiubiquitin chain-binding protein)	0	0	0	0
P34932	Heat shock 70 kDa protein 4 (HSP70RY) (Heat shock 70-related protein APG-2)	0	0	0	0
Q12999	Tetraspanin-31 (Tspan-31) (Sarcoma-amplified sequence)	0	0	0	0
P08572	Collagen alpha-2(IV) chain [Cleaved into: Canstatin]	Yes	Collagens	0	Yes
Q13425	Beta-2-syntrophin (59 kDa dystrophin-associated protein A1 basic component 2) (Syntrophin-3) (SNT3) (Syntrophin-like) (SNTL)	0	0	0	Yes
Q8NFQ8	Torsin-1A-interacting protein 2 (Lumenal domain-like LAP1)	0	0	Yes	0
Q14789	Golgin subfamily B member 1 (372 kDa Golgi complex-associated protein) (GCP372) (Giantin) (Macrogolgin)	0	0	0	0
P37837	Transaldolase (EC 2.2.1.2)	0	0	0	0
P01889	HLA class I histocompatibility antigen, B alpha chain (Human leukocyte antigen B) (HLA-B)	0	0	Yes	0
P60022	Beta-defensin 1 (BD-1) (hBD-1) (Defensin, beta 1)	0	0	0	0
O00264	Membrane-associated progesterone receptor component 1 (mPR) (Dap1) (IZA)	0	0	0	Yes
O60573	Eukaryotic translation initiation factor 4E type 2 (eIF-4E type 2) (eIF4E type 2) (Eukaryotic translation initiation factor 4E homologous protein) (Eukaryotic translation initiation factor 4E-like 3) (eIF4E-like protein 4E-LP) (mRNA cap-binding protein 4EHP) (h4EHP) (mRNA cap-binding protein type 3)	0	0	0	0
Q86V81	THO complex subunit 4 (Tho4) (Ally of AML-1 and LEF-1) (Aly/REF export factor) (Transcriptional coactivator Aly/REF) (bZIP-enhancing factor BEF)	0	0	0	0
P28070	Proteasome subunit beta type-4 (26 kDa prosomal protein) (HsBPROS26) (PROS-26) (Macropain beta chain) (Multicatalytic endopeptidase complex beta chain) (Proteasome beta chain) (Proteasome chain 3) (HsN3)	0	0	0	0
Q04917	14-3-3 protein eta (Protein AS1)	0	0	0	0
Q7L576	Cytoplasmic FMR1-interacting protein 1 (Specifically Rac1-associated protein 1) (Sra-1) (p140sra-1)	0	0	0	0
Q8N9U0	Tandem C2 domains nuclear protein (Membrane targeting tandem C2 domain-containing protein 1) (Tandem C2 protein in nucleus) (Tac2-N)	0	0	0	0
O14653	Golgi SNAP receptor complex member 2 (27 kDa Golgi SNARE protein) (Membrin)	0	0	0	0
P08246	Neutrophil elastase (EC 3.4.21.37) (Bone marrow serine protease) (Elastase-2) (Human leukocyte elastase) (HLE) (Medullasin) (PMN elastase)	Yes	ECM regulators	Yes	0
P43121	Cell surface glycoprotein MUC18 (Cell surface glycoprotein P1H12) (Melanoma cell adhesion molecule) (Melanoma-associated antigen A32) (Melanoma-associated antigen MUC18) (S-endo 1 endothelial-associated antigen) (CD antigen CD146)	0	0	Yes	0
Q9HAV7	GrpE protein homolog 1, mitochondrial (HMGE) (Mt-GrpE#1)	0	0	0	0
P14555	Phospholipase A2, membrane associated (EC 3.1.1.4) (GIIC sPLA2) (Group IIA phospholipase A2) (Non-pancreatic secretory phospholipase A2) (NPS-PLA2) (Phosphatidylcholine 2-acylhydrolase 2A)	0	0	0	0
P42224	Signal transducer and activator of transcription 1-alpha/beta (Transcription factor ISGF-3 components p91/p84)	0	0	0	0
Q9BSD7	Cancer-related nucleoside-triphosphatase (NTPase) (EC 3.6.1.15) (Nucleoside triphosphate phosphohydrolase)	0	0	0	0
P56470	Galectin-4 (Gal-4) (Antigen NY-CO-27) (L-36 lactose-binding protein) (L36LBP) (Lactose-binding lectin 4)	Yes	ECM-affiliated proteins	0	0
Q9NTX5	Ethylmalonyl-CoA decarboxylase (EC 4.1.1.94) (Enoyl-CoA hydratase domain-containing protein 1) (Methylmalonyl-CoA decarboxylase) (MMCD)	0	0	0	0
P20810	Calpastatin (Calpain inhibitor) (Sperm BS-17 component)	0	0	0	0
Q13438	Protein OS-9 (Amplified in osteosarcoma 9)	0	0	Yes	0
Q9NRN5	Olfactomedin-like protein 3 (HNOEL-iso) (hOLF44)	0	0	Yes	0
Q9ULA0	Aspartyl aminopeptidase (EC 3.4.11.21)	0	0	0	0
Q96I24	Far upstream element-binding protein 3 (FUSE-binding protein 3)	0	0	0	0
Q86VU5	Catechol O-methyltransferase domain-containing protein 1 (EC 2.1.1.-)	0	0	0	0
P28799	Progranulin (PGRN) (Acrogranin) (Epithelin precursor) (Glycoprotein of 88 Kda) (GP88) (Glycoprotein 88) (Granulin precursor) (PC cell-derived growth factor) (PCDGF) (Proepithelin) (PEPI) [Cleaved into: Paragranulin; Granulin-1 (Granulin G); Granulin-2 (Granulin F); Granulin-3 (Epithelin-2) (Granulin B); Granulin-4 (Epithelin-1) (Granulin A); Granulin-5 (Granulin C); Granulin-6 (Granulin D); Granu…	0	0	Yes	0
O00571	ATP-dependent RNA helicase DDX3X (EC 3.6.4.13) (CAP-Rf) (DEAD box protein 3, X-chromosomal) (DEAD box, X isoform) (DBX) (Helicase-like protein 2) (HLP2)	0	0	0	0
Q9BUJ2	Heterogeneous nuclear ribonucleoprotein U-like protein 1 (Adenovirus early region 1B-associated protein 5) (E1B-55 kDa-associated protein 5) (E1B-AP5)	0	0	0	0
Q9BW91	ADP-ribose pyrophosphatase, mitochondrial (EC 3.6.1.13) (ADP-ribose diphosphatase) (ADP-ribose phosphohydrolase) (Adenosine diphosphoribose pyrophosphatase) (ADPR-PPase) (Nucleoside diphosphate-linked moiety X motif 9) (Nudix motif 9)	0	0	0	0
Q9Y230	RuvB-like 2 (EC 3.6.4.12) (48 kDa TATA box-binding protein-interacting protein) (48 kDa TBP-interacting protein) (51 kDa erythrocyte cytosolic protein) (ECP-51) (INO80 complex subunit J) (Repressing pontin 52) (Reptin 52) (TIP49b) (TIP60-associated protein 54-beta) (TAP54-beta)	0	0	0	0
O14732	Inositol monophosphatase 2 (IMP 2) (IMPase 2) (EC 3.1.3.25) (Inositol-1(or 4)-monophosphatase 2) (Myo-inositol monophosphatase A2)	0	0	0	0
P63092	Guanine nucleotide-binding protein G(s) subunit alpha isoforms short (Adenylate cyclase-stimulating G alpha protein)	0	0	0	0
P49588	Alanine--tRNA ligase, cytoplasmic (EC 6.1.1.7) (Alanyl-tRNA synthetase) (AlaRS) (Renal carcinoma antigen NY-REN-42)	0	0	0	0
P08574	Cytochrome c1, heme protein, mitochondrial (EC 7.1.1.8) (Complex III subunit 4) (Complex III subunit IV) (Cytochrome b-c1 complex subunit 4) (Ubiquinol-cytochrome-c reductase complex cytochrome c1 subunit) (Cytochrome c-1)	0	0	0	0
P07858	Cathepsin B (EC 3.4.22.1) (APP secretase) (APPS) (Cathepsin B1) [Cleaved into: Cathepsin B light chain; Cathepsin B heavy chain]	Yes	ECM regulators	0	0
O43813	Glutathione S-transferase LANCL1 (EC 2.5.1.18) (40 kDa erythrocyte membrane protein) (p40) (LanC-like protein 1)	0	0	0	0
O95394	Phosphoacetylglucosamine mutase (PAGM) (EC 5.4.2.3) (Acetylglucosamine phosphomutase) (N-acetylglucosamine-phosphate mutase) (Phosphoglucomutase-3) (PGM 3)	0	0	0	0
P51571	Translocon-associated protein subunit delta (TRAP-delta) (Signal sequence receptor subunit delta) (SSR-delta)	0	0	0	0
Q03591	Complement factor H-related protein 1 (FHR-1) (H factor-like protein 1) (H-factor-like 1) (H36)	0	0	Yes	0
P48729	Casein kinase I isoform alpha (CKI-alpha) (EC 2.7.11.1) (CK1)	0	0	0	0
Q9BPW8	Protein NipSnap homolog 1 (NipSnap1)	0	0	0	0
O43684	Mitotic checkpoint protein BUB3	0	0	0	0
P17980	26S proteasome regulatory subunit 6A (26S proteasome AAA-ATPase subunit RPT5) (Proteasome 26S subunit ATPase 3) (Proteasome subunit P50) (Tat-binding protein 1) (TBP-1)	0	0	0	0
Q9Y262	Eukaryotic translation initiation factor 3 subunit L (eIF3l) (Eukaryotic translation initiation factor 3 subunit 6-interacting protein) (Eukaryotic translation initiation factor 3 subunit E-interacting protein)	0	0	0	0
Q86UP2	Kinectin (CG-1 antigen) (Kinesin receptor)	0	0	0	0
Q9UJU6	Drebrin-like protein (Cervical SH3P7) (Cervical mucin-associated protein) (Drebrin-F) (HPK1-interacting protein of 55 kDa) (HIP-55) (SH3 domain-containing protein 7)	0	0	0	0
O14737	Programmed cell death protein 5 (TF-1 cell apoptosis-related protein 19) (Protein TFAR19)	0	0	0	0
P35908	Keratin, type II cytoskeletal 2 epidermal (Cytokeratin-2e) (CK-2e) (Epithelial keratin-2e) (Keratin-2 epidermis) (Keratin-2e) (K2e) (Type-II keratin Kb2)	0	0	0	0
Q9P2M7	Cingulin	0	0	0	0
P41250	Glycine--tRNA ligase (EC 6.1.1.14) (Diadenosine tetraphosphate synthetase) (Ap4A synthetase) (EC 2.7.7.-) (Glycyl-tRNA synthetase) (GlyRS) (Glycyl-tRNA synthetase 1)	0	0	0	0
Q8N4H5	Mitochondrial import receptor subunit TOM5 homolog	0	0	0	0
P51991	Heterogeneous nuclear ribonucleoprotein A3 (hnRNP A3)	0	0	0	0
Q5JRX3	Presequence protease, mitochondrial (hPreP) (EC 3.4.24.-) (Pitrilysin metalloproteinase 1) (Metalloprotease 1) (hMP1)	0	0	0	0
E9PRG8	Uncharacterized protein C11orf98	0	0	0	0
Q96AC1	Fermitin family homolog 2 (Kindlin-2) (Mitogen-inducible gene 2 protein) (MIG-2) (Pleckstrin homology domain-containing family C member 1) (PH domain-containing family C member 1)	0	0	Yes	0
Q6UXH1	Protein disulfide isomerase CRELD2 (EC 5.3.4.1) (Cysteine-rich with EGF-like domain protein 2)	Yes	ECM glycoproteins	Yes	0
P82650	28S ribosomal protein S22, mitochondrial (MRP-S22) (S22mt) (Mitochondrial small ribosomal subunit protein mS22)	0	0	0	0
Q9BSJ8	Extended synaptotagmin-1 (E-Syt1) (Membrane-bound C2 domain-containing protein)	0	0	0	0
Q13630	GDP-L-fucose synthase (EC 1.1.1.271) (GDP-4-keto-6-deoxy-D-mannose-3,5-epimerase-4-reductase) (Protein FX) (Red cell NADP(H)-binding protein) (Short-chain dehydrogenase/reductase family 4E member 1)	0	0	0	0
O00560	Syntenin-1 (Melanoma differentiation-associated protein 9) (MDA-9) (Pro-TGF-alpha cytoplasmic domain-interacting protein 18) (TACIP18) (Scaffold protein Pbp1) (Syndecan-binding protein 1)	0	0	0	0
Q99747	Gamma-soluble NSF attachment protein (SNAP-gamma) (N-ethylmaleimide-sensitive factor attachment protein gamma)	0	0	0	0
P49720	Proteasome subunit beta type-3 (Proteasome chain 13) (Proteasome component C10-II) (Proteasome theta chain)	0	0	0	0
Q9Y3Q3	Transmembrane emp24 domain-containing protein 3 (Membrane protein p24B) (p24 family protein gamma-4) (p24gamma4) (p26)	0	0	0	0
P23142	Fibulin-1 (FIBL-1)	Yes	ECM glycoproteins	0	0
Q9HDC9	Adipocyte plasma membrane-associated protein (Protein BSCv)	0	0	Yes	0
Q6P161	39S ribosomal protein L54, mitochondrial (L54mt) (MRP-L54) (Mitochondrial large ribosomal subunit protein mL54)	0	0	0	0
P11234	Ras-related protein Ral-B (EC 3.6.5.2)	0	0	0	0
O43747	AP-1 complex subunit gamma-1 (Adaptor protein complex AP-1 subunit gamma-1) (Adaptor-related protein complex 1 subunit gamma-1) (Clathrin assembly protein complex 1 gamma-1 large chain) (Gamma1-adaptin) (Golgi adaptor HA1/AP1 adaptin subunit gamma-1)	0	0	0	0
O75323	Protein NipSnap homolog 2 (NipSnap2) (Glioblastoma-amplified sequence)	0	0	0	0
P27816	Microtubule-associated protein 4 (MAP-4)	0	0	0	0
Q15404	Ras suppressor protein 1 (RSP-1) (Rsu-1)	0	0	0	0
O75347	Tubulin-specific chaperone A (TCP1-chaperonin cofactor A) (Tubulin-folding cofactor A) (CFA)	0	0	0	0
Q9Y5X3	Sorting nexin-5	0	0	0	0
P31689	DnaJ homolog subfamily A member 1 (DnaJ protein homolog 2) (HSDJ) (Heat shock 40 kDa protein 4) (Heat shock protein J2) (HSJ-2) (Human DnaJ protein 2) (hDj-2)	0	0	0	0
Q12905	Interleukin enhancer-binding factor 2 (Nuclear factor of activated T-cells 45 kDa)	0	0	0	0
Q9BRQ6	MICOS complex subunit MIC25 (Coiled-coil-helix cristae morphology protein 1) (Coiled-coil-helix-coiled-coil-helix domain-containing protein 6)	0	0	0	0
Q9ULC4	Malignant T-cell-amplified sequence 1 (MCT-1) (Multiple copies T-cell malignancies)	0	0	0	0
Q9NUB1	Acetyl-coenzyme A synthetase 2-like, mitochondrial (EC 6.2.1.1) (Acetate--CoA ligase 2) (Acetyl-CoA synthetase 2) (AceCS2) (Acyl-CoA synthetase short-chain family member 1) (Propionate--CoA ligase) (EC 6.2.1.17)	0	0	0	0
Q13557	Calcium/calmodulin-dependent protein kinase type II subunit delta (CaM kinase II subunit delta) (CaMK-II subunit delta) (EC 2.7.11.17)	0	0	0	0
Q10567	AP-1 complex subunit beta-1 (Adaptor protein complex AP-1 subunit beta-1) (Adaptor-related protein complex 1 subunit beta-1) (Beta-1-adaptin) (Beta-adaptin 1) (Clathrin assembly protein complex 1 beta large chain) (Golgi adaptor HA1/AP1 adaptin beta subunit)	0	0	0	0
P05408	Neuroendocrine protein 7B2 (Pituitary polypeptide) (Secretogranin V) (Secretogranin-5) (Secretory granule endocrine protein I) [Cleaved into: N-terminal peptide; C-terminal peptide]	0	0	0	0
Q8N335	Glycerol-3-phosphate dehydrogenase 1-like protein (GPD1-L) (EC 1.1.1.8)	0	0	0	0
Q9NTJ5	Phosphatidylinositol-3-phosphatase SAC1 (EC 3.1.3.64) (Phosphatidylinositol-4-phosphate phosphatase) (Suppressor of actin mutations 1-like protein)	0	0	0	0
O94906	Pre-mRNA-processing factor 6 (Androgen receptor N-terminal domain-transactivating protein 1) (ANT-1) (PRP6 homolog) (U5 snRNP-associated 102 kDa protein) (U5-102 kDa protein)	0	0	0	0
P50995	Annexin A11 (56 kDa autoantigen) (Annexin XI) (Annexin-11) (Calcyclin-associated annexin 50) (CAP-50)	Yes	ECM-affiliated proteins	0	0
O94776	Metastasis-associated protein MTA2 (Metastasis-associated 1-like 1) (MTA1-L1 protein) (p53 target protein in deacetylase complex)	0	0	0	0
O15258	Protein RER1	0	0	0	0
P22314	Ubiquitin-like modifier-activating enzyme 1 (EC 6.2.1.45) (Protein A1S9) (Ubiquitin-activating enzyme E1)	0	0	0	0
Q9H488	GDP-fucose protein O-fucosyltransferase 1 (EC 2.4.1.221) (Peptide-O-fucosyltransferase 1) (O-FucT-1)	0	0	Yes	0
Q96DC8	Enoyl-CoA hydratase domain-containing protein 3, mitochondrial	0	0	0	0
Q92804	TATA-binding protein-associated factor 2N (68 kDa TATA-binding protein-associated factor) (TAF(II)68) (TAFII68) (RNA-binding protein 56)	0	0	0	0
O00479	High mobility group nucleosome-binding domain-containing protein 4 (Non-histone chromosomal protein HMG-17-like 3) (Non-histone chromosomal protein)	0	0	0	0
Q9UL25	Ras-related protein Rab-21	0	0	0	0
Q8N2K0	Lysophosphatidylserine lipase ABHD12 (EC 3.1.-.-) (2-arachidonoylglycerol hydrolase ABHD12) (Abhydrolase domain-containing protein 12) (hABHD12) (Monoacylglycerol lipase ABHD12) (EC 3.1.1.23) (Oxidized phosphatidylserine lipase ABHD12) (EC 3.1.-.-)	0	0	Yes	0
P50895	Basal cell adhesion molecule (Auberger B antigen) (B-CAM cell surface glycoprotein) (F8/G253 antigen) (Lutheran antigen) (Lutheran blood group glycoprotein) (CD antigen CD239)	0	0	Yes	0
Q13361	Microfibrillar-associated protein 5 (MFAP-5) (MP25) (Microfibril-associated glycoprotein 2) (MAGP-2)	Yes	ECM glycoproteins	Yes	0
Q969H8	Myeloid-derived growth factor (MYDGF)	0	0	0	0
P35241	Radixin	0	0	0	0
Q9ULV4	Coronin-1C (Coronin-3) (hCRNN4)	0	0	0	0
P39687	Acidic leucine-rich nuclear phosphoprotein 32 family member A (Acidic nuclear phosphoprotein pp32) (pp32) (Leucine-rich acidic nuclear protein) (LANP) (Mapmodulin) (Potent heat-stable protein phosphatase 2A inhibitor I1PP2A) (Putative HLA-DR-associated protein I) (PHAPI)	0	0	0	0
P43897	Elongation factor Ts, mitochondrial (EF-Ts) (EF-TsMt)	0	0	0	0
Q6GMV3	Putative peptidyl-tRNA hydrolase PTRHD1 (EC 3.1.1.29) (Peptidyl-tRNA hydrolase domain-containing protein 1)	0	0	0	0
Q9Y305	Acyl-coenzyme A thioesterase 9, mitochondrial (Acyl-CoA thioesterase 9) (EC 3.1.2.-) (Acyl-CoA thioester hydrolase 9)	0	0	0	0
P33121	Long-chain-fatty-acid--CoA ligase 1 (EC 6.2.1.3) (Acyl-CoA synthetase 1) (ACS1) (Arachidonate--CoA ligase) (EC 6.2.1.15) (Long-chain acyl-CoA synthetase 1) (LACS 1) (Long-chain acyl-CoA synthetase 2) (LACS 2) (Long-chain fatty acid-CoA ligase 2) (Palmitoyl-CoA ligase 1) (Palmitoyl-CoA ligase 2) (Phytanate--CoA ligase) (EC 6.2.1.24)	0	0	0	0
P56199	Integrin alpha-1 (CD49 antigen-like family member A) (Laminin and collagen receptor) (VLA-1) (CD antigen CD49a)	0	0	Yes	0
Q9H061	Transmembrane protein 126A	0	0	0	0
Q07157	Tight junction protein ZO-1 (Tight junction protein 1) (Zona occludens protein 1) (Zonula occludens protein 1)	0	0	0	0
P19338	Nucleolin (Protein C23)	0	0	0	0
Q9UGT4	Sushi domain-containing protein 2	0	0	Yes	0
Q9BQG0	Myb-binding protein 1A	0	0	0	Yes
Q13155	Aminoacyl tRNA synthase complex-interacting multifunctional protein 2 (Multisynthase complex auxiliary component p38) (Protein JTV-1)	0	0	0	0
Q9H845	Complex I assembly factor ACAD9, mitochondrial (Acyl-CoA dehydrogenase family member 9) (ACAD-9) (EC 1.3.8.-)	0	0	0	0
O95336	6-phosphogluconolactonase (6PGL) (EC 3.1.1.31)	0	0	0	0
Q9HC38	Glyoxalase domain-containing protein 4	0	0	0	0
Q93099	Homogentisate 1,2-dioxygenase (EC 1.13.11.5) (Homogentisate oxygenase) (Homogentisic acid oxidase) (Homogentisicase)	0	0	0	0
P42126	Enoyl-CoA delta isomerase 1, mitochondrial (EC 5.3.3.8) (3,2-trans-enoyl-CoA isomerase) (Delta(3),Delta(2)-enoyl-CoA isomerase) (D3,D2-enoyl-CoA isomerase) (Dodecenoyl-CoA isomerase)	0	0	0	0
P68400	Casein kinase II subunit alpha (CK II alpha) (EC 2.7.11.1)	0	0	0	0
P22307	Sterol carrier protein 2 (SCP-2) (Acetyl-CoA C-myristoyltransferase) (EC 2.3.1.155) (Non-specific lipid-transfer protein) (NSL-TP) (Propanoyl-CoA C-acyltransferase) (EC 2.3.1.176) (SCP-2/3-oxoacyl-CoA thiolase) (SCP-2/thiolase) (EC 2.3.1.16) (SCP-chi) (SCPX) (Sterol carrier protein X) (SCP-X) (Straight-chain acyl-CoA oxidase) (SCOX)	0	0	0	0
Q8TDN6	Ribosome biogenesis protein BRX1 homolog (Brix domain-containing protein 2)	0	0	0	0
Q8WW12	PEST proteolytic signal-containing nuclear protein (PCNP) (PEST-containing nuclear protein)	0	0	0	0
Q14019	Coactosin-like protein	0	0	0	0
P30566	Adenylosuccinate lyase (ADSL) (ASL) (EC 4.3.2.2) (Adenylosuccinase) (ASase)	0	0	0	0
Q96HS1	Serine/threonine-protein phosphatase PGAM5, mitochondrial (EC 3.1.3.16) (Bcl-XL-binding protein v68) (Phosphoglycerate mutase family member 5)	0	0	0	0
Q9UNM6	26S proteasome non-ATPase regulatory subunit 13 (26S proteasome regulatory subunit RPN9) (26S proteasome regulatory subunit S11) (26S proteasome regulatory subunit p40.5)	0	0	0	0
Q9BRX8	Peroxiredoxin-like 2A (Peroxiredoxin-like 2 activated in M-CSF stimulated monocytes) (Protein PAMM) (Redox-regulatory protein FAM213A)	0	0	0	0
Q9NY12	H/ACA ribonucleoprotein complex subunit 1 (Nucleolar protein family A member 1) (snoRNP protein GAR1)	0	0	0	0
Q14203	Dynactin subunit 1 (150 kDa dynein-associated polypeptide) (DAP-150) (DP-150) (p135) (p150-glued)	0	0	0	0
Q8N0X4	Citramalyl-CoA lyase, mitochondrial (EC 4.1.3.25) ((3S)-malyl-CoA thioesterase) (EC 3.1.2.30) (Beta-methylmalate synthase) (EC 2.3.3.-) (Citrate lyase subunit beta-like protein) (Citrate lyase beta-like) (Malate synthase) (EC 2.3.3.9)	0	0	0	0
P53634	Dipeptidyl peptidase 1 (EC 3.4.14.1) (Cathepsin C) (Cathepsin J) (Dipeptidyl peptidase I) (DPP-I) (DPPI) (Dipeptidyl transferase) [Cleaved into: Dipeptidyl peptidase 1 exclusion domain chain (Dipeptidyl peptidase I exclusion domain chain); Dipeptidyl peptidase 1 heavy chain (Dipeptidyl peptidase I heavy chain); Dipeptidyl peptidase 1 light chain (Dipeptidyl peptidase I light chain)]	Yes	ECM regulators	Yes	0
P28074	Proteasome subunit beta type-5 (EC 3.4.25.1) (Macropain epsilon chain) (Multicatalytic endopeptidase complex epsilon chain) (Proteasome chain 6) (Proteasome epsilon chain) (Proteasome subunit MB1) (Proteasome subunit X)	0	0	0	0
P63173	60S ribosomal protein L38 (Large ribosomal subunit protein eL38)	0	0	0	0
P08621	U1 small nuclear ribonucleoprotein 70 kDa (U1 snRNP 70 kDa) (U1-70K) (snRNP70)	0	0	0	0
P35268	60S ribosomal protein L22 (EBER-associated protein) (EAP) (Epstein-Barr virus small RNA-associated protein) (Heparin-binding protein HBp15) (Large ribosomal subunit protein eL22)	0	0	0	0
P31939	Bifunctional purine biosynthesis protein ATIC (AICAR transformylase/inosine monophosphate cyclohydrolase) (ATIC) [Cleaved into: Bifunctional purine biosynthesis protein ATIC, N-terminally processed] [Includes: Phosphoribosylaminoimidazolecarboxamide formyltransferase (EC 2.1.2.3) (5-aminoimidazole-4-carboxamide ribonucleotide formyltransferase) (AICAR formyltransferase) (AICAR transformylase); In…	0	0	0	0
Q9BT78	COP9 signalosome complex subunit 4 (SGN4) (Signalosome subunit 4) (JAB1-containing signalosome subunit 4)	0	0	0	0
P09669	Cytochrome c oxidase subunit 6C (Cytochrome c oxidase polypeptide VIc)	0	0	0	0
P11387	DNA topoisomerase 1 (EC 5.6.2.1) (DNA topoisomerase I)	0	0	0	0
Q15185	Prostaglandin E synthase 3 (EC 5.3.99.3) (Cytosolic prostaglandin E2 synthase) (cPGES) (Hsp90 co-chaperone) (Progesterone receptor complex p23) (Telomerase-binding protein p23)	0	0	0	0
O14558	Heat shock protein beta-6 (HspB6) (Heat shock 20 kDa-like protein p20)	0	0	0	0
P11279	Lysosome-associated membrane glycoprotein 1 (LAMP-1) (Lysosome-associated membrane protein 1) (CD107 antigen-like family member A) (CD antigen CD107a)	0	0	Yes	0
Q16531	DNA damage-binding protein 1 (DDB p127 subunit) (DNA damage-binding protein a) (DDBa) (Damage-specific DNA-binding protein 1) (HBV X-associated protein 1) (XAP-1) (UV-damaged DNA-binding factor) (UV-damaged DNA-binding protein 1) (UV-DDB 1) (XPE-binding factor) (XPE-BF) (Xeroderma pigmentosum group E-complementing protein) (XPCe)	0	0	Yes	0
Q99436	Proteasome subunit beta type-7 (EC 3.4.25.1) (Macropain chain Z) (Multicatalytic endopeptidase complex chain Z) (Proteasome subunit Z)	0	0	0	0
P26583	High mobility group protein B2 (High mobility group protein 2) (HMG-2)	0	0	0	0
P30519	Heme oxygenase 2 (HO-2) (EC 1.14.14.18)	0	0	0	0
P05204	Non-histone chromosomal protein HMG-17 (High mobility group nucleosome-binding domain-containing protein 2)	0	0	0	0
P07357	Complement component C8 alpha chain (Complement component 8 subunit alpha)	0	0	Yes	0
Q6NUK1	Calcium-binding mitochondrial carrier protein SCaMC-1 (Mitochondrial ATP-Mg/Pi carrier protein 1) (Mitochondrial Ca(2+)-dependent solute carrier protein 1) (Small calcium-binding mitochondrial carrier protein 1) (Solute carrier family 25 member 24)	0	0	0	0
Q7Z4H8	Protein O-glucosyltransferase 3 (EC 2.4.1.-) (KDEL motif-containing protein 2) (Protein O-xylosyltransferase POGLUT3) (EC 2.4.2.-)	0	0	Yes	0
O43583	Density-regulated protein (DRP) (Protein DRP1) (Smooth muscle cell-associated protein 3) (SMAP-3)	0	0	0	0
Q5UCC4	ER membrane protein complex subunit 10 (Hematopoietic signal peptide-containing membrane domain-containing protein 1)	0	0	Yes	0
O75494	Serine/arginine-rich splicing factor 10 (40 kDa SR-repressor protein) (SRrp40) (FUS-interacting serine-arginine-rich protein 1) (Splicing factor SRp38) (Splicing factor, arginine/serine-rich 13A) (TLS-associated protein with Ser-Arg repeats) (TASR) (TLS-associated protein with SR repeats) (TLS-associated serine-arginine protein) (TLS-associated SR protein)	0	0	Yes	0
Q9Y3A5	Ribosome maturation protein SBDS (Shwachman-Bodian-Diamond syndrome protein)	0	0	0	0
Q16740	ATP-dependent Clp protease proteolytic subunit, mitochondrial (EC 3.4.21.92) (Endopeptidase Clp)	0	0	0	0
Q687X5	Metalloreductase STEAP4 (EC 1.16.1.9) (Six-transmembrane epithelial antigen of prostate 4) (SixTransMembrane protein of prostate 2) (Tumor necrosis factor, alpha-induced protein 9)	0	0	0	0
P01116	GTPase KRas (EC 3.6.5.2) (K-Ras 2) (Ki-Ras) (c-K-ras) (c-Ki-ras) [Cleaved into: GTPase KRas, N-terminally processed]	0	0	0	0
P50570	Dynamin-2 (EC 3.6.5.5)	0	0	Yes	0
Q9Y2H6	Fibronectin type-III domain-containing protein 3A (Human gene expressed in odontoblasts)	0	0	0	0
P07741	Adenine phosphoribosyltransferase (APRT) (EC 2.4.2.7)	0	0	0	0
Q8N684	Cleavage and polyadenylation specificity factor subunit 7 (Cleavage and polyadenylation specificity factor 59 kDa subunit) (CPSF 59 kDa subunit) (Cleavage factor Im complex 59 kDa subunit) (CFIm59) (Pre-mRNA cleavage factor Im 59 kDa subunit)	0	0	0	0
P08651	Nuclear factor 1 C-type (NF1-C) (Nuclear factor 1/C) (CCAAT-box-binding transcription factor) (CTF) (Nuclear factor I/C) (NF-I/C) (NFI-C) (TGGCA-binding protein)	0	0	0	0
Q5SWX8	Protein odr-4 homolog (hODR-4) (LAG1-interacting protein) (Transactivated by transforming growth factor beta protein 1)	0	0	0	0
P01619	Immunoglobulin kappa variable 3-20 (Ig kappa chain V-III region B6) (Ig kappa chain V-III region GOL) (Ig kappa chain V-III region HAH) (Ig kappa chain V-III region HIC) (Ig kappa chain V-III region IARC/BL41) (Ig kappa chain V-III region NG9) (Ig kappa chain V-III region SIE) (Ig kappa chain V-III region Ti) (Ig kappa chain V-III region WOL)	0	0	0	0
P63279	SUMO-conjugating enzyme UBC9 (EC 2.3.2.-) (RING-type E3 SUMO transferase UBC9) (SUMO-protein ligase) (Ubiquitin carrier protein 9) (Ubiquitin carrier protein I) (Ubiquitin-conjugating enzyme E2 I) (Ubiquitin-protein ligase I) (p18)	0	0	0	0
Q71UM5	40S ribosomal protein S27-like (Small ribosomal subunit protein eS27-like)	0	0	0	0
P13671	Complement component C6	0	0	Yes	0
Q5T440	Putative transferase CAF17, mitochondrial (EC 2.1.-.-) (Iron-sulfur cluster assembly factor homolog)	0	0	0	0
Q9HD20	Endoplasmic reticulum transmembrane helix translocase (EC 7.4.2.-) (Endoplasmic reticulum P5A-ATPase)	0	0	0	0
O94979	Protein transport protein Sec31A (ABP125) (ABP130) (SEC31-like protein 1) (SEC31-related protein A) (Web1-like protein)	0	0	0	Yes
P52815	39S ribosomal protein L12, mitochondrial (L12mt) (MRP-L12) (5c5-2) (Mitochondrial large ribosomal subunit protein bL12m)	0	0	0	0
Q92878	DNA repair protein RAD50 (hRAD50) (EC 3.6.-.-)	0	0	0	0
O60504	Vinexin (SH3-containing adapter molecule 1) (SCAM-1) (Sorbin and SH3 domain-containing protein 3)	0	0	0	0
Q9UQN3	Charged multivesicular body protein 2b (CHMP2.5) (Chromatin-modifying protein 2b) (CHMP2b) (Vacuolar protein sorting-associated protein 2-2) (Vps2-2) (hVps2-2)	0	0	Yes	0
Q9Y3C6	Peptidyl-prolyl cis-trans isomerase-like 1 (PPIase) (EC 5.2.1.8) (Rotamase PPIL1)	0	0	0	0
Q15363	Transmembrane emp24 domain-containing protein 2 (Membrane protein p24A) (p24) (p24 family protein beta-1) (p24beta1)	0	0	0	0
Q9UM54	Unconventional myosin-VI (Unconventional myosin-6)	0	0	0	0
Q16853	Membrane primary amine oxidase (EC 1.4.3.21) (Copper amine oxidase) (HPAO) (Semicarbazide-sensitive amine oxidase) (SSAO) (Vascular adhesion protein 1) (VAP-1)	0	0	Yes	0
P24158	Myeloblastin (EC 3.4.21.76) (AGP7) (C-ANCA antigen) (Leukocyte proteinase 3) (PR-3) (PR3) (Neutrophil proteinase 4) (NP-4) (P29) (Wegener autoantigen)	0	0	0	0
Q9BWM7	Sideroflexin-3	0	0	0	0
P60983	Glia maturation factor beta (GMF-beta)	0	0	0	0
Q15459	Splicing factor 3A subunit 1 (SF3a120) (Spliceosome-associated protein 114) (SAP 114)	0	0	0	0
Q86X76	Deaminated glutathione amidase (dGSH amidase) (EC 3.5.1.128) (Nitrilase homolog 1)	0	0	0	0
P20908	Collagen alpha-1(V) chain	Yes	Collagens	Yes	Yes
P22234	Multifunctional protein ADE2 [Includes: Phosphoribosylaminoimidazole-succinocarboxamide synthase (EC 6.3.2.6) (SAICAR synthetase); Phosphoribosylaminoimidazole carboxylase (EC 4.1.1.21) (AIR carboxylase) (AIRC)]	0	0	0	0
P43034	Platelet-activating factor acetylhydrolase IB subunit beta (Lissencephaly-1 protein) (LIS-1) (PAF acetylhydrolase 45 kDa subunit) (PAF-AH 45 kDa subunit) (PAF-AH alpha) (PAFAH alpha)	0	0	0	0
Q01105	Protein SET (HLA-DR-associated protein II) (Inhibitor of granzyme A-activated DNase) (IGAAD) (PHAPII) (Phosphatase 2A inhibitor I2PP2A) (I-2PP2A) (Template-activating factor I) (TAF-I)	0	0	0	0
P62330	ADP-ribosylation factor 6	0	0	0	0
Q15836	Vesicle-associated membrane protein 3 (VAMP-3) (Cellubrevin) (CEB) (Synaptobrevin-3)	0	0	0	0
P05455	Lupus La protein (La autoantigen) (La ribonucleoprotein) (Sjoegren syndrome type B antigen) (SS-B)	0	0	0	0
Q9BS26	Endoplasmic reticulum resident protein 44 (ER protein 44) (ERp44) (Thioredoxin domain-containing protein 4)	0	0	0	0
P43308	Translocon-associated protein subunit beta (TRAP-beta) (Signal sequence receptor subunit beta) (SSR-beta)	0	0	Yes	0
Q9P0V9	Septin-10	0	0	0	0
Q9UQE7	Structural maintenance of chromosomes protein 3 (SMC protein 3) (SMC-3) (Basement membrane-associated chondroitin proteoglycan) (Bamacan) (Chondroitin sulfate proteoglycan 6) (Chromosome-associated polypeptide) (hCAP)	0	0	0	0
P62847	40S ribosomal protein S24 (Small ribosomal subunit protein eS24)	0	0	0	0
Q6UXI9	Nephronectin (Preosteoblast EGF-like repeat protein with MAM domain) (Protein EGFL6-like)	Yes	ECM glycoproteins	0	0
P23526	Adenosylhomocysteinase (AdoHcyase) (EC 3.3.1.1) (S-adenosyl-L-homocysteine hydrolase)	0	0	0	0
Q9BQ15	SOSS complex subunit B1 (Nucleic acid-binding protein 2) (Oligonucleotide/oligosaccharide-binding fold-containing protein 2B) (Sensor of single-strand DNA complex subunit B1) (Sensor of ssDNA subunit B1) (SOSS-B1) (Single-stranded DNA-binding protein 1) (hSSB1)	0	0	0	0
O60704	Protein-tyrosine sulfotransferase 2 (EC 2.8.2.20) (Tyrosylprotein sulfotransferase 2) (TPST-2)	0	0	0	0
Q9H7Z7	Prostaglandin E synthase 2 (EC 5.3.99.3) (Membrane-associated prostaglandin E synthase-2) (mPGE synthase-2) (Microsomal prostaglandin E synthase 2) (mPGES-2) (Prostaglandin-H(2) E-isomerase) [Cleaved into: Prostaglandin E synthase 2 truncated form]	0	0	0	0
Q2TAY7	WD40 repeat-containing protein SMU1 (Smu-1 suppressor of mec-8 and unc-52 protein homolog) [Cleaved into: WD40 repeat-containing protein SMU1, N-terminally processed]	0	0	0	0
Q99613	Eukaryotic translation initiation factor 3 subunit C (eIF3c) (Eukaryotic translation initiation factor 3 subunit 8) (eIF3 p110)	0	0	0	0
Q92734	Protein TFG (TRK-fused gene protein)	0	0	0	0
P62879	Guanine nucleotide-binding protein G(I)/G(S)/G(T) subunit beta-2 (G protein subunit beta-2) (Transducin beta chain 2)	0	0	0	0
Q6PIU2	Neutral cholesterol ester hydrolase 1 (NCEH) (EC 3.1.1.-) (Arylacetamide deacetylase-like 1)	0	0	0	0
Q969Z3	Mitochondrial amidoxime reducing component 2 (mARC2) (EC 1.7.-.-) (Molybdenum cofactor sulfurase C-terminal domain-containing protein 2) (MOSC domain-containing protein 2) (Moco sulfurase C-terminal domain-containing protein 2)	0	0	0	0
Q99571	P2X purinoceptor 4 (P2X4) (ATP receptor) (Purinergic receptor)	0	0	Yes	0
Q9NPA0	ER membrane protein complex subunit 7	0	0	0	0
P61006	Ras-related protein Rab-8A (Oncogene c-mel)	0	0	0	0
Q9H307	Pinin (140 kDa nuclear and cell adhesion-related phosphoprotein) (Desmosome-associated protein) (Domain-rich serine protein) (DRS protein) (DRSP) (Melanoma metastasis clone A protein) (Nuclear protein SDK3) (SR-like protein)	0	0	0	0
Q6DKI1	60S ribosomal protein L7-like 1 (Large ribosomal subunit protein uL30-like 1)	0	0	0	0
P25311	Zinc-alpha-2-glycoprotein (Zn-alpha-2-GP) (Zn-alpha-2-glycoprotein)	0	0	0	0
Q8WXF1	Paraspeckle component 1 (Paraspeckle protein 1)	0	0	0	0
Q13501	Sequestosome-1 (EBI3-associated protein of 60 kDa) (EBIAP) (p60) (Phosphotyrosine-independent ligand for the Lck SH2 domain of 62 kDa) (Ubiquitin-binding protein p62)	0	0	0	0
Q96CW1	AP-2 complex subunit mu (AP-2 mu chain) (Adaptin-mu2) (Adaptor protein complex AP-2 subunit mu) (Adaptor-related protein complex 2 subunit mu) (Clathrin assembly protein complex 2 mu medium chain) (Clathrin coat assembly protein AP50) (Clathrin coat-associated protein AP50) (HA2 50 kDa subunit) (Plasma membrane adaptor AP-2 50 kDa protein)	0	0	0	0
Q9UK22	F-box only protein 2	0	0	0	0
O75643	U5 small nuclear ribonucleoprotein 200 kDa helicase (EC 3.6.4.13) (Activating signal cointegrator 1 complex subunit 3-like 1) (BRR2 homolog) (U5 snRNP-specific 200 kDa protein) (U5-200KD)	0	0	0	Yes
O95202	Mitochondrial proton/calcium exchanger protein (Leucine zipper-EF-hand-containing transmembrane protein 1)	0	0	0	0
Q9GZY8	Mitochondrial fission factor	0	0	0	0
O15400	Syntaxin-7	0	0	0	0
Q7Z3B4	Nucleoporin p54 (54 kDa nucleoporin)	0	0	0	0
O60664	Perilipin-3 (47 kDa mannose 6-phosphate receptor-binding protein) (47 kDa MPR-binding protein) (Cargo selection protein TIP47) (Mannose-6-phosphate receptor-binding protein 1) (Placental protein 17) (PP17)	0	0	0	0
P54710	Sodium/potassium-transporting ATPase subunit gamma (Na(+)/K(+) ATPase subunit gamma) (FXYD domain-containing ion transport regulator 2) (Sodium pump gamma chain)	0	0	0	0
P22352	Glutathione peroxidase 3 (GPx-3) (GSHPx-3) (EC 1.11.1.9) (Extracellular glutathione peroxidase) (Plasma glutathione peroxidase) (GPx-P) (GSHPx-P)	0	0	0	0
P12931	Proto-oncogene tyrosine-protein kinase Src (EC 2.7.10.2) (Proto-oncogene c-Src) (pp60c-src) (p60-Src)	0	0	0	Yes
P56134	ATP synthase subunit f, mitochondrial (ATP synthase membrane subunit f)	0	0	0	0
P15502	Elastin (Tropoelastin)	Yes	ECM glycoproteins	0	0
P50502	Hsc70-interacting protein (Hip) (Aging-associated protein 2) (Progesterone receptor-associated p48 protein) (Protein FAM10A1) (Putative tumor suppressor ST13) (Renal carcinoma antigen NY-REN-33) (Suppression of tumorigenicity 13 protein)	0	0	0	0
Q92616	eIF-2-alpha kinase activator GCN1 (GCN1 eIF-2-alpha kinase activator homolog) (GCN1-like protein 1) (General control of amino-acid synthesis 1-like protein 1) (Translational activator GCN1) (HsGCN1)	0	0	0	0
P17480	Nucleolar transcription factor 1 (Autoantigen NOR-90) (Upstream-binding factor 1) (UBF-1)	0	0	0	0
Q9NYF8	Bcl-2-associated transcription factor 1 (Btf) (BCLAF1 and THRAP3 family member 1)	0	0	0	Yes
P09661	U2 small nuclear ribonucleoprotein A' (U2 snRNP A')	0	0	0	0
Q9NX14	NADH dehydrogenase [ubiquinone] 1 beta subcomplex subunit 11, mitochondrial (Complex I-ESSS) (CI-ESSS) (NADH-ubiquinone oxidoreductase ESSS subunit) (Neuronal protein 17.3) (Np17.3) (p17.3)	0	0	0	0
P26368	Splicing factor U2AF 65 kDa subunit (U2 auxiliary factor 65 kDa subunit) (hU2AF(65)) (hU2AF65) (U2 snRNP auxiliary factor large subunit)	0	0	0	0
Q16774	Guanylate kinase (EC 2.7.4.8) (GMP kinase) (Guanylate kinase 1)	0	0	0	0
Q9P258	Protein RCC2 (RCC1-like protein TD-60) (Telophase disk protein of 60 kDa)	0	0	0	0
Q6IAN0	Dehydrogenase/reductase SDR family member 7B (EC 1.1.-.-) (Short-chain dehydrogenase/reductase family 32C member 1)	0	0	0	0
Q13283	Ras GTPase-activating protein-binding protein 1 (G3BP-1) (EC 3.6.4.12) (EC 3.6.4.13) (ATP-dependent DNA helicase VIII) (hDH VIII) (GAP SH3 domain-binding protein 1)	0	0	0	0
Q9BV40	Vesicle-associated membrane protein 8 (VAMP-8) (Endobrevin) (EDB)	0	0	0	0
P28161	Glutathione S-transferase Mu 2 (EC 2.5.1.18) (GST class-mu 2) (GSTM2-2)	0	0	0	0
O95865	N(G),N(G)-dimethylarginine dimethylaminohydrolase 2 (DDAH-2) (Dimethylarginine dimethylaminohydrolase 2) (EC 3.5.3.18) (DDAHII) (Dimethylargininase-2) (Protein G6a) (S-phase protein)	0	0	0	0
P63172	Dynein light chain Tctex-type 1 (Protein CW-1) (T-complex testis-specific protein 1 homolog)	0	0	0	0
O14495	Phospholipid phosphatase 3 (EC 3.1.3.-) (EC 3.1.3.4) (Lipid phosphate phosphohydrolase 3) (PAP2-beta) (Phosphatidate phosphohydrolase type 2b) (Phosphatidic acid phosphatase 2b) (PAP-2b) (PAP2b) (Vascular endothelial growth factor and type I collagen-inducible protein) (VCIP)	0	0	0	0
P04233	HLA class II histocompatibility antigen gamma chain (HLA-DR antigens-associated invariant chain) (Ia antigen-associated invariant chain) (Ii) (CD antigen CD74) [Cleaved into: Class-II-associated invariant chain peptide (CLIP)]	0	0	Yes	0
Q96IJ6	Mannose-1-phosphate guanyltransferase alpha (GDP-mannose pyrophosphorylase A) (GMPP-alpha) (GTP-mannose-1-phosphate guanylyltransferase alpha)	0	0	0	0
O43676	NADH dehydrogenase [ubiquinone] 1 beta subcomplex subunit 3 (Complex I-B12) (CI-B12) (NADH-ubiquinone oxidoreductase B12 subunit)	0	0	0	0
Q14118	Dystroglycan (Dystrophin-associated glycoprotein 1) [Cleaved into: Alpha-dystroglycan (Alpha-DG); Beta-dystroglycan (Beta-DG)]	0	0	Yes	0
O15240	Neurosecretory protein VGF [Cleaved into: Neuroendocrine regulatory peptide-1 (NERP-1); Neuroendocrine regulatory peptide-2 (NERP-2); VGF-derived peptide TLQP-21; VGF-derived peptide TLQP-62; Antimicrobial peptide VGF[554-577]]	0	0	0	0
O75475	PC4 and SFRS1-interacting protein (CLL-associated antigen KW-7) (Dense fine speckles 70 kDa protein) (DFS 70) (Lens epithelium-derived growth factor) (Transcriptional coactivator p75/p52)	0	0	0	0
P35659	Protein DEK	0	0	Yes	0
P54652	Heat shock-related 70 kDa protein 2 (Heat shock 70 kDa protein 2)	0	0	0	0
Q96PE7	Methylmalonyl-CoA epimerase, mitochondrial (EC 5.1.99.1) (DL-methylmalonyl-CoA racemase)	0	0	0	0
Q15050	Ribosome biogenesis regulatory protein homolog	0	0	0	0
Q8IYJ3	Synaptotagmin-like protein 1 (Exophilin-7) (Protein JFC1)	0	0	0	0
Q16563	Synaptophysin-like protein 1 (Pantophysin)	0	0	Yes	0
Q99442	Translocation protein SEC62 (Translocation protein 1) (TP-1) (hTP-1)	0	0	0	Yes
Q86U42	Polyadenylate-binding protein 2 (PABP-2) (Poly(A)-binding protein 2) (Nuclear poly(A)-binding protein 1) (Poly(A)-binding protein II) (PABII) (Polyadenylate-binding nuclear protein 1)	0	0	0	0
Q9UKD2	mRNA turnover protein 4 homolog (Ribosome assembly factor MRTO4)	0	0	0	0
Q8NDH3	Probable aminopeptidase NPEPL1 (EC 3.4.11.-) (Aminopeptidase-like 1)	0	0	0	0
P05155	Plasma protease C1 inhibitor (C1 Inh) (C1Inh) (C1 esterase inhibitor) (C1-inhibiting factor) (Serpin G1)	Yes	ECM regulators	Yes	0
Q15393	Splicing factor 3B subunit 3 (Pre-mRNA-splicing factor SF3b 130 kDa subunit) (SF3b130) (STAF130) (Spliceosome-associated protein 130) (SAP 130)	0	0	0	0
P41227	N-alpha-acetyltransferase 10 (EC 2.3.1.255) (N-terminal acetyltransferase complex ARD1 subunit homolog A) (hARD1) (NatA catalytic subunit Naa10)	0	0	0	0
P50579	Methionine aminopeptidase 2 (MAP 2) (MetAP 2) (EC 3.4.11.18) (Initiation factor 2-associated 67 kDa glycoprotein) (p67) (p67eIF2) (Peptidase M)	0	0	0	0
Q6P2I3	Fumarylacetoacetate hydrolase domain-containing protein 2B (EC 3.-.-.-)	0	0	0	0
O94919	Endonuclease domain-containing 1 protein (EC 3.1.30.-)	0	0	0	0
Q969G3	SWI/SNF-related matrix-associated actin-dependent regulator of chromatin subfamily E member 1 (BRG1-associated factor 57) (BAF57)	0	0	0	0
P62995	Transformer-2 protein homolog beta (TRA-2 beta) (TRA2-beta) (hTRA2-beta) (Splicing factor, arginine/serine-rich 10) (Transformer-2 protein homolog B)	0	0	0	Yes
P46939	Utrophin (Dystrophin-related protein 1) (DRP-1)	0	0	0	0
Q02790	Peptidyl-prolyl cis-trans isomerase FKBP4 (PPIase FKBP4) (EC 5.2.1.8) (51 kDa FK506-binding protein) (FKBP51) (52 kDa FK506-binding protein) (52 kDa FKBP) (FKBP-52) (59 kDa immunophilin) (p59) (FK506-binding protein 4) (FKBP-4) (FKBP59) (HSP-binding immunophilin) (HBI) (Immunophilin FKBP52) (Rotamase) [Cleaved into: Peptidyl-prolyl cis-trans isomerase FKBP4, N-terminally processed]	0	0	0	0
P33316	Deoxyuridine 5'-triphosphate nucleotidohydrolase, mitochondrial (dUTPase) (EC 3.6.1.23) (dUTP pyrophosphatase)	0	0	0	0
O00217	NADH dehydrogenase [ubiquinone] iron-sulfur protein 8, mitochondrial (EC 7.1.1.2) (Complex I-23kD) (CI-23kD) (NADH-ubiquinone oxidoreductase 23 kDa subunit) (TYKY subunit)	0	0	0	0
Q9UDW1	Cytochrome b-c1 complex subunit 9 (Complex III subunit 9) (Complex III subunit X) (Cytochrome c1 non-heme 7 kDa protein) (Ubiquinol-cytochrome c reductase complex 7.2 kDa protein)	0	0	0	0
Q9BU61	NADH dehydrogenase [ubiquinone] 1 alpha subcomplex assembly factor 3	0	0	0	0
Q969E4	Transcription elongation factor A protein-like 3 (TCEA-like protein 3) (Transcription elongation factor S-II protein-like 3)	0	0	0	0
P21283	V-type proton ATPase subunit C 1 (V-ATPase subunit C 1) (Vacuolar proton pump subunit C 1)	0	0	Yes	0
P63027	Vesicle-associated membrane protein 2 (VAMP-2) (Synaptobrevin-2)	0	0	0	0
P62993	Growth factor receptor-bound protein 2 (Adapter protein GRB2) (Protein Ash) (SH2/SH3 adapter GRB2)	0	0	0	0
P28676	Grancalcin	0	0	0	0
Q8WVM8	Sec1 family domain-containing protein 1 (SLY1 homolog) (Sly1p) (Syntaxin-binding protein 1-like 2)	0	0	0	0
Q9UNH7	Sorting nexin-6 (TRAF4-associated factor 2) [Cleaved into: Sorting nexin-6, N-terminally processed]	0	0	0	0
P67870	Casein kinase II subunit beta (CK II beta) (Phosvitin) (Protein G5a)	0	0	0	0
O96005	Cleft lip and palate transmembrane protein 1	0	0	Yes	0
O43681	ATPase GET3 (EC 3.6.-.-) (Arsenical pump-driving ATPase) (Arsenite-stimulated ATPase) (Guided entry of tail-anchored proteins factor 3, ATPase) (Transmembrane domain recognition complex 40 kDa ATPase subunit) (hARSA-I) (hASNA-I)	0	0	0	0
P49207	60S ribosomal protein L34 (Large ribosomal subunit protein eL34)	0	0	0	0
P08218	Chymotrypsin-like elastase family member 2B (EC 3.4.21.71) (Elastase-2B)	Yes	ECM regulators	0	0
P51648	Aldehyde dehydrogenase family 3 member A2 (EC 1.2.1.3) (EC 1.2.1.94) (Aldehyde dehydrogenase 10) (Fatty aldehyde dehydrogenase) (Microsomal aldehyde dehydrogenase)	0	0	0	0
P13987	CD59 glycoprotein (1F5 antigen) (20 kDa homologous restriction factor) (HRF-20) (HRF20) (MAC-inhibitory protein) (MAC-IP) (MEM43 antigen) (Membrane attack complex inhibition factor) (MACIF) (Membrane inhibitor of reactive lysis) (MIRL) (Protectin) (CD antigen CD59)	0	0	Yes	0
P09110	3-ketoacyl-CoA thiolase, peroxisomal (EC 2.3.1.16) (Acetyl-CoA C-myristoyltransferase) (EC 2.3.1.155) (Acetyl-CoA acyltransferase) (EC 2.3.1.9) (Beta-ketothiolase) (Peroxisomal 3-oxoacyl-CoA thiolase)	0	0	0	0
O00584	Ribonuclease T2 (EC 4.6.1.19) (Ribonuclease 6)	0	0	0	0
Q9Y383	Putative RNA-binding protein Luc7-like 2	0	0	0	0
Q92542	Nicastrin	0	0	Yes	0
Q9Y3D9	28S ribosomal protein S23, mitochondrial (MRP-S23) (S23mt) (Mitochondrial small ribosomal subunit protein mS23)	0	0	0	0
P41218	Myeloid cell nuclear differentiation antigen	0	0	Yes	0
O43488	Aflatoxin B1 aldehyde reductase member 2 (EC 1.1.1.n11) (AFB1 aldehyde reductase 1) (AFB1-AR 1) (Aldoketoreductase 7) (Succinic semialdehyde reductase) (SSA reductase)	0	0	0	0
P23588	Eukaryotic translation initiation factor 4B (eIF-4B)	0	0	0	Yes
P00751	Complement factor B (EC 3.4.21.47) (C3/C5 convertase) (Glycine-rich beta glycoprotein) (GBG) (PBF2) (Properdin factor B) [Cleaved into: Complement factor B Ba fragment; Complement factor B Bb fragment]	0	0	0	0
Q9UEY8	Gamma-adducin (Adducin-like protein 70)	0	0	Yes	0
Q9Y221	60S ribosome subunit biogenesis protein NIP7 homolog (KD93)	0	0	0	0
Q16595	Frataxin, mitochondrial (EC 1.16.3.1) (Friedreich ataxia protein) (Fxn) [Cleaved into: Frataxin intermediate form (i-FXN); Frataxin(56-210) (m56-FXN); Frataxin(78-210) (d-FXN) (m78-FXN); Frataxin mature form (Frataxin(81-210)) (m81-FXN)]	0	0	0	0
Q14344	Guanine nucleotide-binding protein subunit alpha-13 (G alpha-13) (G-protein subunit alpha-13)	0	0	0	0
P61964	WD repeat-containing protein 5 (BMP2-induced 3-kb gene protein)	0	0	0	0
Q96C19	EF-hand domain-containing protein D2 (Swiprosin-1)	0	0	0	0
Q9H4M9	EH domain-containing protein 1 (PAST homolog 1) (hPAST1) (Testilin)	0	0	0	0
P17858	ATP-dependent 6-phosphofructokinase, liver type (ATP-PFK) (PFK-L) (EC 2.7.1.11) (6-phosphofructokinase type B) (Phosphofructo-1-kinase isozyme B) (PFK-B) (Phosphohexokinase)	0	0	0	0
Q9P035	Very-long-chain (3R)-3-hydroxyacyl-CoA dehydratase 3 (EC 4.2.1.134) (3-hydroxyacyl-CoA dehydratase 3) (HACD3) (Butyrate-induced protein 1) (B-ind1) (hB-ind1) (Protein-tyrosine phosphatase-like A domain-containing protein 1)	0	0	0	0
P20933	N(4)-(beta-N-acetylglucosaminyl)-L-asparaginase (EC 3.5.1.26) (Aspartylglucosaminidase) (Glycosylasparaginase) (N4-(N-acetyl-beta-glucosaminyl)-L-asparagine amidase) [Cleaved into: Glycosylasparaginase alpha chain; Glycosylasparaginase beta chain]	0	0	Yes	0
P01034	Cystatin-C (Cystatin-3) (Gamma-trace) (Neuroendocrine basic polypeptide) (Post-gamma-globulin)	Yes	ECM regulators	0	0
P08962	CD63 antigen (Granulophysin) (Lysosomal-associated membrane protein 3) (LAMP-3) (Melanoma-associated antigen ME491) (OMA81H) (Ocular melanoma-associated antigen) (Tetraspanin-30) (Tspan-30) (CD antigen CD63)	0	0	Yes	0
P19367	Hexokinase-1 (EC 2.7.1.1) (Brain form hexokinase) (Hexokinase type I) (HK I) (Hexokinase-A)	0	0	0	0
Q92552	28S ribosomal protein S27, mitochondrial (MRP-S27) (S27mt) (Mitochondrial ribosomal protein S27) (Mitochondrial small ribosomal subunit protein mS27)	0	0	0	0
Q99460	26S proteasome non-ATPase regulatory subunit 1 (26S proteasome regulatory subunit RPN2) (26S proteasome regulatory subunit S1) (26S proteasome subunit p112)	0	0	0	0
Q16401	26S proteasome non-ATPase regulatory subunit 5 (26S protease subunit S5 basic) (26S proteasome subunit S5B)	0	0	0	0
P12724	Eosinophil cationic protein (ECP) (EC 3.1.27.-) (Ribonuclease 3) (RNase 3)	0	0	Yes	0
Q8N766	ER membrane protein complex subunit 1	0	0	Yes	0
P62308	Small nuclear ribonucleoprotein G (snRNP-G) (Sm protein G) (Sm-G) (SmG)	0	0	0	0
P08571	Monocyte differentiation antigen CD14 (Myeloid cell-specific leucine-rich glycoprotein) (CD antigen CD14) [Cleaved into: Monocyte differentiation antigen CD14, urinary form; Monocyte differentiation antigen CD14, membrane-bound form]	0	0	Yes	0
Q92947	Glutaryl-CoA dehydrogenase, mitochondrial (GCD) (EC 1.3.8.6)	0	0	0	0
Q15424	Scaffold attachment factor B1 (SAF-B) (SAF-B1) (HSP27 estrogen response element-TATA box-binding protein) (HSP27 ERE-TATA-binding protein)	0	0	0	Yes
P49915	GMP synthase [glutamine-hydrolyzing] (EC 6.3.5.2) (GMP synthetase) (Glutamine amidotransferase)	0	0	Yes	0
P26447	Protein S100-A4 (Calvasculin) (Metastasin) (Placental calcium-binding protein) (Protein Mts1) (S100 calcium-binding protein A4)	Yes	Secreted factors	0	0
P35475	Alpha-L-iduronidase (EC 3.2.1.76)	0	0	Yes	0
P61201	COP9 signalosome complex subunit 2 (SGN2) (Signalosome subunit 2) (Alien homolog) (JAB1-containing signalosome subunit 2) (Thyroid receptor-interacting protein 15) (TR-interacting protein 15) (TRIP-15)	0	0	0	0
Q8N163	Cell cycle and apoptosis regulator protein 2 (Cell division cycle and apoptosis regulator protein 2) (DBIRD complex subunit KIAA1967) (Deleted in breast cancer gene 1 protein) (DBC-1) (DBC.1) (NET35) (p30 DBC)	0	0	0	0
O95340	Bifunctional 3'-phosphoadenosine 5'-phosphosulfate synthase 2 (PAPS synthase 2) (PAPSS 2) (Sulfurylase kinase 2) (SK 2) (SK2) [Includes: Sulfate adenylyltransferase (EC 2.7.7.4) (ATP-sulfurylase) (Sulfate adenylate transferase) (SAT); Adenylyl-sulfate kinase (EC 2.7.1.25) (3'-phosphoadenosine-5'-phosphosulfate synthase) (APS kinase) (Adenosine-5'-phosphosulfate 3'-phosphotransferase) (Adenylylsul…	0	0	0	0
P61421	V-type proton ATPase subunit d 1 (V-ATPase subunit d 1) (32 kDa accessory protein) (V-ATPase 40 kDa accessory protein) (V-ATPase AC39 subunit) (p39) (Vacuolar proton pump subunit d 1)	0	0	0	0
P15153	Ras-related C3 botulinum toxin substrate 2 (GX) (Small G protein) (p21-Rac2)	0	0	0	0
Q92575	UBX domain-containing protein 4 (Erasin) (UBX domain-containing protein 2)	0	0	0	0
P00966	Argininosuccinate synthase (EC 6.3.4.5) (Citrulline--aspartate ligase)	0	0	0	0
P12004	Proliferating cell nuclear antigen (PCNA) (Cyclin)	0	0	0	0
Q14232	Translation initiation factor eIF-2B subunit alpha (eIF-2B GDP-GTP exchange factor subunit alpha)	0	0	0	0
P35613	Basigin (5F7) (Collagenase stimulatory factor) (Extracellular matrix metalloproteinase inducer) (EMMPRIN) (Hepatoma-associated antigen) (HAb18G) (Leukocyte activation antigen M6) (OK blood group antigen) (Tumor cell-derived collagenase stimulatory factor) (TCSF) (CD antigen CD147)	0	0	Yes	Yes
Q9BUQ8	Probable ATP-dependent RNA helicase DDX23 (EC 3.6.4.13) (100 kDa U5 snRNP-specific protein) (DEAD box protein 23) (PRP28 homolog) (U5-100kD)	0	0	0	0
P15088	Mast cell carboxypeptidase A (MC-CPA) (EC 3.4.17.1) (Carboxypeptidase A3)	0	0	Yes	0
Q14978	Nucleolar and coiled-body phosphoprotein 1 (140 kDa nucleolar phosphoprotein) (Nopp140) (Hepatitis C virus NS5A-transactivated protein 13) (HCV NS5A-transactivated protein 13) (Nucleolar 130 kDa protein) (Nucleolar phosphoprotein p130)	0	0	Yes	Yes
O43402	ER membrane protein complex subunit 8 (Neighbor of COX4) (Protein FAM158B)	0	0	0	0
P61923	Coatomer subunit zeta-1 (Zeta-1-coat protein) (Zeta-1 COP)	0	0	0	0
Q8IUE6	Histone H2A type 2-B (H2A-clustered histone 21)	0	0	0	0
O76021	Ribosomal L1 domain-containing protein 1 (CATX-11) (Cellular senescence-inhibited gene protein) (Protein PBK1)	0	0	0	0
Q12805	EGF-containing fibulin-like extracellular matrix protein 1 (Extracellular protein S1-5) (Fibrillin-like protein) (Fibulin-3) (FIBL-3)	Yes	ECM glycoproteins	0	0
P20645	Cation-dependent mannose-6-phosphate receptor (CD Man-6-P receptor) (CD-MPR) (46 kDa mannose 6-phosphate receptor) (MPR 46)	0	0	Yes	0
P22033	Methylmalonyl-CoA mutase, mitochondrial (MCM) (EC 5.4.99.2) (Methylmalonyl-CoA isomerase)	0	0	0	0
P35914	Hydroxymethylglutaryl-CoA lyase, mitochondrial (HL) (HMG-CoA lyase) (EC 4.1.3.4) (3-hydroxy-3-methylglutarate-CoA lyase)	0	0	0	0
Q9Y3D7	Mitochondrial import inner membrane translocase subunit TIM16 (Mitochondria-associated granulocyte macrophage CSF-signaling molecule) (Presequence translocated-associated motor subunit PAM16)	0	0	0	0
P49903	Selenide, water dikinase 1 (EC 2.7.9.3) (Selenium donor protein 1) (Selenophosphate synthase 1)	0	0	0	0
O00422	Histone deacetylase complex subunit SAP18 (18 kDa Sin3-associated polypeptide) (2HOR0202) (Cell growth-inhibiting gene 38 protein) (Sin3-associated polypeptide p18)	0	0	0	0
Q9Y6Q5	AP-1 complex subunit mu-2 (AP-mu chain family member mu1B) (Adaptor protein complex AP-1 subunit mu-2) (Adaptor-related protein complex 1 subunit mu-2) (Clathrin assembly protein complex 1 mu-2 medium chain 2) (Golgi adaptor HA1/AP1 adaptin mu-2 subunit) (Mu-adaptin 2) (Mu1B-adaptin)	0	0	0	0
O00629	Importin subunit alpha-3 (Importin alpha Q1) (Qip1) (Karyopherin subunit alpha-4)	0	0	0	0
Q9Y2T2	AP-3 complex subunit mu-1 (AP-3 adaptor complex mu3A subunit) (Adaptor-related protein complex 3 subunit mu-1) (Mu-adaptin 3A) (Mu3A-adaptin)	0	0	0	0
P62304	Small nuclear ribonucleoprotein E (snRNP-E) (Sm protein E) (Sm-E) (SmE)	0	0	Yes	0
Q96EE3	Nucleoporin SEH1 (GATOR complex protein SEH1) (Nup107-160 subcomplex subunit SEH1) (SEC13-like protein)	0	0	0	0
P49721	Proteasome subunit beta type-2 (Macropain subunit C7-I) (Multicatalytic endopeptidase complex subunit C7-I) (Proteasome component C7-I)	0	0	0	0
Q9Y320	Thioredoxin-related transmembrane protein 2 (Cell proliferation-inducing gene 26 protein) (Thioredoxin domain-containing protein 14)	0	0	Yes	0
O60869	Endothelial differentiation-related factor 1 (EDF-1) (Multiprotein-bridging factor 1) (MBF1)	0	0	0	0
O60493	Sorting nexin-3 (Protein SDP3)	0	0	0	0
P61956	Small ubiquitin-related modifier 2 (SUMO-2) (HSMT3) (SMT3 homolog 2) (SUMO-3) (Sentrin-2) (Ubiquitin-like protein SMT3B) (Smt3B)	0	0	0	0
Q99459	Cell division cycle 5-like protein (Cdc5-like protein) (Pombe cdc5-related protein)	0	0	0	0
P52565	Rho GDP-dissociation inhibitor 1 (Rho GDI 1) (Rho-GDI alpha)	0	0	0	0
O60256	Phosphoribosyl pyrophosphate synthase-associated protein 2 (PRPP synthase-associated protein 2) (41 kDa phosphoribosypyrophosphate synthetase-associated protein) (PAP41)	0	0	Yes	0
Q86WA6	Valacyclovir hydrolase (VACVase) (Valacyclovirase) (EC 3.1.-.-) (Biphenyl hydrolase-like protein) (Biphenyl hydrolase-related protein) (Bph-rp) (Breast epithelial mucin-associated antigen) (MCNAA)	0	0	0	0
P48059	LIM and senescent cell antigen-like-containing domain protein 1 (Particularly interesting new Cys-His protein 1) (PINCH-1) (Renal carcinoma antigen NY-REN-48)	0	0	0	0
P62714	Serine/threonine-protein phosphatase 2A catalytic subunit beta isoform (PP2A-beta) (EC 3.1.3.16)	0	0	0	0
Q5XKP0	MICOS complex subunit MIC13 (Protein P117)	0	0	0	0
O75937	DnaJ homolog subfamily C member 8 (Splicing protein spf31)	0	0	0	0
P48304	Lithostathine-1-beta (Pancreatic stone protein 2) (PSP-2) (Regenerating islet-derived protein 1-beta) (REG-1-beta) (Regenerating protein I beta)	Yes	ECM-affiliated proteins	0	0
Q8N5M9	Protein jagunal homolog 1	0	0	0	0
P48061	Stromal cell-derived factor 1 (SDF-1) (hSDF-1) (C-X-C motif chemokine 12) (Intercrine reduced in hepatomas) (IRH) (hIRH) (Pre-B cell growth-stimulating factor) (PBSF) [Cleaved into: SDF-1-beta(3-72); SDF-1-alpha(3-67)]	Yes	Secreted factors	0	0
Q96PC5	Melanoma inhibitory activity protein 2 (MIA protein 2) (CTAGE family member 5 ER export factor) (Cutaneous T-cell lymphoma-associated antigen 5) (Meningioma-expressed antigen 6/11)	0	0	0	0
P23258	Tubulin gamma-1 chain (Gamma-1-tubulin) (Gamma-tubulin complex component 1) (GCP-1)	0	0	0	0
Q9BXS5	AP-1 complex subunit mu-1 (AP-mu chain family member mu1A) (Adaptor protein complex AP-1 subunit mu-1) (Adaptor-related protein complex 1 subunit mu-1) (Clathrin assembly protein complex 1 mu-1 medium chain 1) (Clathrin coat assembly protein AP47) (Clathrin coat-associated protein AP47) (Golgi adaptor HA1/AP1 adaptin mu-1 subunit) (Mu-adaptin 1) (Mu1A-adaptin)	0	0	0	0
P35610	Sterol O-acyltransferase 1 (EC 2.3.1.26) (Acyl-coenzyme A:cholesterol acyltransferase 1) (ACAT-1) (Cholesterol acyltransferase 1)	0	0	0	0
P62136	Serine/threonine-protein phosphatase PP1-alpha catalytic subunit (PP-1A) (EC 3.1.3.16)	0	0	0	0
O60749	Sorting nexin-2 (Transformation-related gene 9 protein) (TRG-9)	0	0	0	0
Q96PK6	RNA-binding protein 14 (Paraspeckle protein 2) (PSP2) (RNA-binding motif protein 14) (RRM-containing coactivator activator/modulator) (Synaptotagmin-interacting protein) (SYT-interacting protein)	0	0	0	0
Q96A65	Exocyst complex component 4 (Exocyst complex component Sec8)	0	0	0	0
Q9Y2V2	Calcium-regulated heat-stable protein 1 (Calcium-regulated heat-stable protein of 24 kDa) (CRHSP-24)	0	0	0	0
Q9Y5K6	CD2-associated protein (Adapter protein CMS) (Cas ligand with multiple SH3 domains)	0	0	0	0
Q14157	Ubiquitin-associated protein 2-like (Protein NICE-4)	0	0	Yes	0
O75830	Serpin I2 (Myoepithelium-derived serine protease inhibitor) (Pancpin) (Pancreas-specific protein TSA2004) (Peptidase inhibitor 14) (PI-14)	Yes	ECM regulators	0	0
P25788	Proteasome subunit alpha type-3 (Macropain subunit C8) (Multicatalytic endopeptidase complex subunit C8) (Proteasome component C8)	0	0	0	0
P55786	Puromycin-sensitive aminopeptidase (PSA) (EC 3.4.11.14) (Cytosol alanyl aminopeptidase) (AAP-S)	0	0	0	0
Q8NHM4	Putative trypsin-6 (EC 3.4.21.4) (Serine protease 3 pseudogene 2) (Trypsinogen C)	0	0	0	Yes
Q9UBX3	Mitochondrial dicarboxylate carrier (Solute carrier family 25 member 10)	0	0	0	0
Q9HD89	Resistin (Adipose tissue-specific secretory factor) (ADSF) (C/EBP-epsilon-regulated myeloid-specific secreted cysteine-rich protein) (Cysteine-rich secreted protein A12-alpha-like 2) (Cysteine-rich secreted protein FIZZ3)	0	0	0	0
O14828	Secretory carrier-associated membrane protein 3 (Secretory carrier membrane protein 3)	0	0	0	0
O60613	Selenoprotein F (15 kDa selenoprotein)	0	0	0	0
P19440	Glutathione hydrolase 1 proenzyme (EC 3.4.19.13) (Gamma-glutamyltransferase 1) (Gamma-glutamyltranspeptidase 1) (GGT 1) (EC 2.3.2.2) (Leukotriene-C4 hydrolase) (EC 3.4.19.14) (CD antigen CD224) [Cleaved into: Glutathione hydrolase 1 heavy chain; Glutathione hydrolase 1 light chain]	0	0	Yes	0
Q9BUT1	3-hydroxybutyrate dehydrogenase type 2 (EC 1.1.1.-) (EC 1.1.1.30) (Dehydrogenase/reductase SDR family member 6) (Oxidoreductase UCPA) (R-beta-hydroxybutyrate dehydrogenase) (Short chain dehydrogenase/reductase family 15C member 1)	0	0	0	0
A0A0B4J1X5	Immunoglobulin heavy variable 3-74	0	0	0	0
Q9BXW7	Haloacid dehalogenase-like hydrolase domain-containing 5 (Cat eye syndrome critical region protein 5)	0	0	0	0
Q9NQG5	Regulation of nuclear pre-mRNA domain-containing protein 1B (Cell cycle-related and expression-elevated protein in tumor)	0	0	0	0
Q8NBX0	Saccharopine dehydrogenase-like oxidoreductase (EC 1.-.-.-)	0	0	Yes	0
P50416	Carnitine O-palmitoyltransferase 1, liver isoform (CPT1-L) (EC 2.3.1.21) (Carnitine O-palmitoyltransferase I, liver isoform) (CPT I) (CPTI-L) (Carnitine palmitoyltransferase 1A)	0	0	0	0
Q9Y639	Neuroplastin (Stromal cell-derived receptor 1) (SDR-1)	0	0	Yes	0
Q14498	RNA-binding protein 39 (CAPER alpha) (CAPERalpha) (Hepatocellular carcinoma protein 1) (RNA-binding motif protein 39) (RNA-binding region-containing protein 2) (Splicing factor HCC1)	0	0	0	Yes
O95881	Thioredoxin domain-containing protein 12 (EC 1.8.4.2) (Endoplasmic reticulum resident protein 18) (ER protein 18) (ERp18) (Endoplasmic reticulum resident protein 19) (ER protein 19) (ERp19) (Thioredoxin-like protein p19) (hTLP19)	0	0	0	0
O95674	Phosphatidate cytidylyltransferase 2 (EC 2.7.7.41) (CDP-DAG synthase 2) (CDP-DG synthase 2) (CDP-diacylglycerol synthase 2) (CDS 2) (CDP-diglyceride pyrophosphorylase 2) (CDP-diglyceride synthase 2) (CTP:phosphatidate cytidylyltransferase 2)	0	0	0	0
O75569	Interferon-inducible double-stranded RNA-dependent protein kinase activator A (PKR-associated protein X) (PKR-associating protein X) (Protein activator of the interferon-induced protein kinase) (Protein kinase, interferon-inducible double-stranded RNA-dependent activator)	0	0	0	0
Q53FZ2	Acyl-coenzyme A synthetase ACSM3, mitochondrial (EC 6.2.1.2) (Acyl-CoA synthetase medium-chain family member 3) (Butyrate--CoA ligase 3) (Butyryl-coenzyme A synthetase 3) (Middle-chain acyl-CoA synthetase 3) (Propionate--CoA ligase) (EC 6.2.1.17) (Protein SA homolog)	0	0	0	0
Q9NPR9	Protein GPR108 (Lung seven transmembrane receptor 2)	0	0	0	0
Q16850	Lanosterol 14-alpha demethylase (LDM) (EC 1.14.14.154) (CYPLI) (Cytochrome P450 51A1) (Cytochrome P450-14DM) (Cytochrome P45014DM) (Cytochrome P450LI) (Sterol 14-alpha demethylase)	0	0	0	0
Q9BQ69	ADP-ribose glycohydrolase MACROD1 (MACRO domain-containing protein 1) (O-acetyl-ADP-ribose deacetylase MACROD1) (EC 3.1.1.106) (Protein LRP16) ([Protein ADP-ribosylaspartate] hydrolase MACROD1) (EC 3.2.2.-) ([Protein ADP-ribosylglutamate] hydrolase MACROD1) (EC 3.2.2.-)	0	0	Yes	0
Q02818	Nucleobindin-1 (CALNUC)	0	0	0	0
Q9BTT0	Acidic leucine-rich nuclear phosphoprotein 32 family member E (LANP-like protein) (LANP-L)	0	0	0	0
Q7Z739	YTH domain-containing family protein 3	0	0	0	0
P07900	Heat shock protein HSP 90-alpha (EC 3.6.4.10) (Heat shock 86 kDa) (HSP 86) (HSP86) (Lipopolysaccharide-associated protein 2) (LAP-2) (LPS-associated protein 2) (Renal carcinoma antigen NY-REN-38)	0	0	0	Yes
Q9UGI8	Testin (TESS)	0	0	0	0
Q9NRJ3	C-C motif chemokine 28 (Mucosae-associated epithelial chemokine) (MEC) (Protein CCK1) (Small-inducible cytokine A28)	Yes	Secreted factors	0	0
P51690	Arylsulfatase L (EC 3.1.6.-) (Arylsulfatase E) (ASE)	0	0	Yes	0
P06730	Eukaryotic translation initiation factor 4E (eIF-4E) (eIF4E) (eIF-4F 25 kDa subunit) (mRNA cap-binding protein)	0	0	0	0
O94903	Pyridoxal phosphate homeostasis protein (PLP homeostasis protein) (Proline synthase co-transcribed bacterial homolog protein) (Pyridoxal phosphate-binding protein)	0	0	0	0
Q9HCD5	Nuclear receptor coactivator 5 (NCoA-5) (Coactivator independent of AF-2) (CIA)	0	0	0	0
P07358	Complement component C8 beta chain (Complement component 8 subunit beta)	0	0	Yes	0
Q7Z6K5	Arpin (Arp2/3 inhibition protein)	0	0	0	0
O95298	NADH dehydrogenase [ubiquinone] 1 subunit C2 (Complex I-B14.5b) (CI-B14.5b) (Human lung cancer oncogene 1 protein) (HLC-1) (NADH-ubiquinone oxidoreductase subunit B14.5b)	0	0	0	0
P17931	Galectin-3 (Gal-3) (35 kDa lectin) (Carbohydrate-binding protein 35) (CBP 35) (Galactose-specific lectin 3) (Galactoside-binding protein) (GALBP) (IgE-binding protein) (L-31) (Laminin-binding protein) (Lectin L-29) (Mac-2 antigen)	Yes	ECM-affiliated proteins	0	0
Q96GG9	DCN1-like protein 1 (DCNL1) (DCUN1 domain-containing protein 1) (Defective in cullin neddylation protein 1-like protein 1) (Squamous cell carcinoma-related oncogene)	0	0	0	0
Q8N6H7	ADP-ribosylation factor GTPase-activating protein 2 (ARF GAP 2) (GTPase-activating protein ZNF289) (Zinc finger protein 289)	0	0	0	0
Q9H0U4	Ras-related protein Rab-1B	0	0	0	0
Q14011	Cold-inducible RNA-binding protein (A18 hnRNP) (Glycine-rich RNA-binding protein CIRP)	0	0	0	0
P51665	26S proteasome non-ATPase regulatory subunit 7 (26S proteasome regulatory subunit RPN8) (26S proteasome regulatory subunit S12) (Mov34 protein homolog) (Proteasome subunit p40)	0	0	0	0
O75431	Metaxin-2 (Mitochondrial outer membrane import complex protein 2)	0	0	0	0
Q9Y3D6	Mitochondrial fission 1 protein (FIS1 homolog) (hFis1) (Tetratricopeptide repeat protein 11) (TPR repeat protein 11)	0	0	0	0
Q96JB5	CDK5 regulatory subunit-associated protein 3 (CDK5 activator-binding protein C53) (LXXLL/leucine-zipper-containing ARF-binding protein) (Protein HSF-27)	0	0	Yes	0
P24310	Cytochrome c oxidase subunit 7A1, mitochondrial (Cytochrome c oxidase subunit VIIa-heart) (Cytochrome c oxidase subunit VIIa-H) (Cytochrome c oxidase subunit VIIa-muscle) (Cytochrome c oxidase subunit VIIa-M)	0	0	0	0
Q96QK1	Vacuolar protein sorting-associated protein 35 (hVPS35) (Maternal-embryonic 3) (Vesicle protein sorting 35)	0	0	0	0
Q9Y5U9	Immediate early response 3-interacting protein 1	0	0	0	0
P59665	Neutrophil defensin 1 (Defensin, alpha 1) (HNP-1) (HP-1) (HP1) [Cleaved into: HP 1-56; Neutrophil defensin 2 (HNP-2) (HP-2) (HP2)]	0	0	0	0
P61026	Ras-related protein Rab-10 (EC 3.6.5.2)	0	0	0	0
Q49A26	Putative oxidoreductase GLYR1 (EC 1.-.-.-) (3-hydroxyisobutyrate dehydrogenase-like protein) (Cytokine-like nuclear factor N-PAC) (Glyoxylate reductase 1 homolog) (Nuclear protein NP60) (Nuclear protein of 60 kDa) (Nucleosome-destabilizing factor) (hNDF)	0	0	0	0
P49914	5-formyltetrahydrofolate cyclo-ligase (EC 6.3.3.2) (5,10-methenyl-tetrahydrofolate synthetase) (MTHFS) (Methenyl-THF synthetase)	0	0	0	0
O60313	Dynamin-like 120 kDa protein, mitochondrial (EC 3.6.5.5) (Optic atrophy protein 1) [Cleaved into: Dynamin-like 120 kDa protein, form S1]	0	0	Yes	0
P12821	Angiotensin-converting enzyme (ACE) (EC 3.2.1.-) (EC 3.4.15.1) (Dipeptidyl carboxypeptidase I) (Kininase II) (CD antigen CD143) [Cleaved into: Angiotensin-converting enzyme, soluble form]	0	0	Yes	0
P09001	39S ribosomal protein L3, mitochondrial (L3mt) (MRP-L3) (Mitochondrial large ribosomal subunit protein uL3m)	0	0	0	0
O43324	Eukaryotic translation elongation factor 1 epsilon-1 (Aminoacyl tRNA synthetase complex-interacting multifunctional protein 3) (Elongation factor p18) (Multisynthase complex auxiliary component p18)	0	0	0	Yes
O14907	Tax1-binding protein 3 (Glutaminase-interacting protein 3) (Tax interaction protein 1) (TIP-1) (Tax-interacting protein 1)	0	0	0	0
O94973	AP-2 complex subunit alpha-2 (100 kDa coated vesicle protein C) (Adaptor protein complex AP-2 subunit alpha-2) (Adaptor-related protein complex 2 subunit alpha-2) (Alpha-adaptin C) (Alpha2-adaptin) (Clathrin assembly protein complex 2 alpha-C large chain) (Huntingtin yeast partner J) (Huntingtin-interacting protein 9) (HIP-9) (Huntingtin-interacting protein J) (Plasma membrane adaptor HA2/AP2 ada…	0	0	0	0
P78344	Eukaryotic translation initiation factor 4 gamma 2 (eIF-4-gamma 2) (eIF-4G 2) (eIF4G 2) (Death-associated protein 5) (DAP-5) (p97)	0	0	0	0
Q96RP9	Elongation factor G, mitochondrial (EF-Gmt) (Elongation factor G 1, mitochondrial) (mEF-G 1) (Elongation factor G1) (hEFG1)	0	0	0	0
O14979	Heterogeneous nuclear ribonucleoprotein D-like (hnRNP D-like) (hnRNP DL) (AU-rich element RNA-binding factor) (JKT41-binding protein) (Protein laAUF1)	0	0	0	0
Q9NS69	Mitochondrial import receptor subunit TOM22 homolog (hTom22) (1C9-2) (Translocase of outer membrane 22 kDa subunit homolog)	0	0	0	0
P12830	Cadherin-1 (CAM 120/80) (Epithelial cadherin) (E-cadherin) (Uvomorulin) (CD antigen CD324) [Cleaved into: E-Cad/CTF1; E-Cad/CTF2; E-Cad/CTF3]	0	0	0	0
P62312	U6 snRNA-associated Sm-like protein LSm6	0	0	0	0
P30038	Delta-1-pyrroline-5-carboxylate dehydrogenase, mitochondrial (P5C dehydrogenase) (EC 1.2.1.88) (Aldehyde dehydrogenase family 4 member A1) (L-glutamate gamma-semialdehyde dehydrogenase)	0	0	0	0
P63010	AP-2 complex subunit beta (AP105B) (Adaptor protein complex AP-2 subunit beta) (Adaptor-related protein complex 2 subunit beta) (Beta-2-adaptin) (Beta-adaptin) (Clathrin assembly protein complex 2 beta large chain) (Plasma membrane adaptor HA2/AP2 adaptin beta subunit)	0	0	0	0
O00400	Acetyl-coenzyme A transporter 1 (AT-1) (Acetyl-CoA transporter 1) (Solute carrier family 33 member 1)	0	0	0	0
Q9BVP2	Guanine nucleotide-binding protein-like 3 (E2-induced gene 3 protein) (Novel nucleolar protein 47) (NNP47) (Nucleolar GTP-binding protein 3) (Nucleostemin)	0	0	0	0
Q92572	AP-3 complex subunit sigma-1 (AP-3 complex subunit sigma-3A) (Adaptor-related protein complex 3 subunit sigma-1) (Clathrin-associated/assembly/adaptor protein, small 3) (Sigma-3A-adaptin) (Sigma3A-adaptin) (Sigma-adaptin 3a)	0	0	0	0
P30419	Glycylpeptide N-tetradecanoyltransferase 1 (EC 2.3.1.97) (Myristoyl-CoA:protein N-myristoyltransferase 1) (NMT 1) (Type I N-myristoyltransferase) (Peptide N-myristoyltransferase 1)	0	0	0	0
P78347	General transcription factor II-I (GTFII-I) (TFII-I) (Bruton tyrosine kinase-associated protein 135) (BAP-135) (BTK-associated protein 135) (SRF-Phox1-interacting protein) (SPIN) (Williams-Beuren syndrome chromosomal region 6 protein)	0	0	0	Yes
P84090	Enhancer of rudimentary homolog	0	0	0	0
Q10588	ADP-ribosyl cyclase/cyclic ADP-ribose hydrolase 2 (EC 3.2.2.6) (ADP-ribosyl cyclase 2) (Bone marrow stromal antigen 1) (BST-1) (Cyclic ADP-ribose hydrolase 2) (cADPr hydrolase 2) (CD antigen CD157)	0	0	Yes	0
Q9BXP5	Serrate RNA effector molecule homolog (Arsenite-resistance protein 2)	0	0	0	0
O15347	High mobility group protein B3 (High mobility group protein 2a) (HMG-2a) (High mobility group protein 4) (HMG-4)	0	0	0	0
Q9UKV3	Apoptotic chromatin condensation inducer in the nucleus (Acinus)	0	0	0	Yes
Q9NYK5	39S ribosomal protein L39, mitochondrial (L39mt) (MRP-L39) (39S ribosomal protein L5, mitochondrial) (L5mt) (MRP-L5) (Mitochondrial large ribosomal subunit protein mL39)	0	0	0	0
Q9Y3F4	Serine-threonine kinase receptor-associated protein (MAP activator with WD repeats) (UNR-interacting protein) (WD-40 repeat protein PT-WD)	0	0	0	0
Q07666	KH domain-containing, RNA-binding, signal transduction-associated protein 1 (GAP-associated tyrosine phosphoprotein p62) (Src-associated in mitosis 68 kDa protein) (Sam68) (p21 Ras GTPase-activating protein-associated p62) (p68)	0	0	0	0
Q08378	Golgin subfamily A member 3 (Golgi complex-associated protein of 170 kDa) (GCP170) (Golgin-160)	0	0	0	0
O75208	Ubiquinone biosynthesis protein COQ9, mitochondrial	0	0	Yes	0
O43172	U4/U6 small nuclear ribonucleoprotein Prp4 (PRP4 homolog) (hPrp4) (U4/U6 snRNP 60 kDa protein) (WD splicing factor Prp4)	0	0	0	0
O75436	Vacuolar protein sorting-associated protein 26A (Vesicle protein sorting 26A) (hVPS26)	0	0	0	0
Q15631	Translin (EC 3.1.-.-) (Component 3 of promoter of RISC) (C3PO)	0	0	0	0
Q8WWC4	m-AAA protease-interacting protein 1, mitochondrial (Matrix AAA peptidase-interacting protein 1)	0	0	0	0
P49770	Translation initiation factor eIF-2B subunit beta (S20I15) (S20III15) (eIF-2B GDP-GTP exchange factor subunit beta)	0	0	0	0
P10321	HLA class I histocompatibility antigen, C alpha chain (HLA-C) (HLA-Cw) (Human leukocyte antigen C)	0	0	Yes	0
Q14677	Clathrin interactor 1 (Clathrin-interacting protein localized in the trans-Golgi region) (Clint) (Enthoprotin) (Epsin-4) (Epsin-related protein) (EpsinR)	0	0	0	0
Q99715	Collagen alpha-1(XII) chain	Yes	Collagens	Yes	0
Q4G0N4	NAD kinase 2, mitochondrial (EC 2.7.1.23) (Mitochondrial NAD kinase) (NAD kinase domain-containing protein 1, mitochondrial)	0	0	0	0
O60437	Periplakin (190 kDa paraneoplastic pemphigus antigen) (195 kDa cornified envelope precursor protein)	0	0	0	0
Q8NE71	ATP-binding cassette sub-family F member 1 (ATP-binding cassette 50) (TNF-alpha-stimulated ABC protein)	0	0	0	Yes
O00233	26S proteasome non-ATPase regulatory subunit 9 (26S proteasome regulatory subunit p27)	0	0	0	0
P04003	C4b-binding protein alpha chain (C4bp) (Proline-rich protein) (PRP)	0	0	0	0
O43181	NADH dehydrogenase [ubiquinone] iron-sulfur protein 4, mitochondrial (Complex I-18 kDa) (CI-18 kDa) (Complex I-AQDQ) (CI-AQDQ) (NADH-ubiquinone oxidoreductase 18 kDa subunit)	0	0	0	0
Q13151	Heterogeneous nuclear ribonucleoprotein A0 (hnRNP A0)	0	0	0	0
Q5JRA6	Transport and Golgi organization protein 1 homolog (TANGO1) (C219-reactive peptide) (D320) (Melanoma inhibitory activity protein 3)	0	0	Yes	0
Q9NR30	Nucleolar RNA helicase 2 (EC 3.6.4.13) (DEAD box protein 21) (Gu-alpha) (Nucleolar RNA helicase Gu) (Nucleolar RNA helicase II) (RH II/Gu)	0	0	0	0
P56537	Eukaryotic translation initiation factor 6 (eIF-6) (B(2)GCN homolog) (B4 integrin interactor) (CAB) (p27(BBP))	0	0	0	0
Q9UL46	Proteasome activator complex subunit 2 (11S regulator complex subunit beta) (REG-beta) (Activator of multicatalytic protease subunit 2) (Proteasome activator 28 subunit beta) (PA28b) (PA28beta)	0	0	0	0
Q9UBQ5	Eukaryotic translation initiation factor 3 subunit K (eIF3k) (Eukaryotic translation initiation factor 3 subunit 12) (Muscle-specific gene M9 protein) (PLAC-24) (eIF-3 p25) (eIF-3 p28)	0	0	0	0
Q5HYK3	2-methoxy-6-polyprenyl-1,4-benzoquinol methylase, mitochondrial (EC 2.1.1.201) (Ubiquinone biosynthesis methyltransferase COQ5)	0	0	0	0
Q9NRW7	Vacuolar protein sorting-associated protein 45 (h-VPS45) (hlVps45)	0	0	0	0
Q9Y4J8	Dystrobrevin alpha (DTN-A) (Alpha-dystrobrevin) (Dystrophin-related protein 3)	0	0	0	0
Q86VB7	Scavenger receptor cysteine-rich type 1 protein M130 (Hemoglobin scavenger receptor) (CD antigen CD163) [Cleaved into: Soluble CD163 (sCD163)]	0	0	Yes	0
Q9Y3C8	Ubiquitin-fold modifier-conjugating enzyme 1 (Ufm1-conjugating enzyme 1)	0	0	0	0
Q9BR76	Coronin-1B (Coronin-2)	0	0	0	0
P15121	Aldo-keto reductase family 1 member B1 (EC 1.1.1.300) (EC 1.1.1.372) (EC 1.1.1.54) (Aldehyde reductase) (Aldose reductase) (AR) (EC 1.1.1.21)	0	0	0	0
Q96IU4	Protein ABHD14B (EC 3.-.-.-) (Alpha/beta hydrolase domain-containing protein 14B) (Abhydrolase domain-containing protein 14B) (CCG1-interacting factor B)	0	0	0	0
Q9BRP8	Partner of Y14 and mago (PYM homolog 1 exon junction complex-associated factor) (Protein wibg homolog)	0	0	0	0
Q13885	Tubulin beta-2A chain (Tubulin beta class IIa)	0	0	0	0
P10644	cAMP-dependent protein kinase type I-alpha regulatory subunit (Tissue-specific extinguisher 1) (TSE1)	0	0	0	0
P02746	Complement C1q subcomponent subunit B	Yes	ECM-affiliated proteins	0	0
Q6UW68	Transmembrane protein 205	0	0	0	0
P80297	Metallothionein-1X (MT-1X) (Metallothionein-IX) (MT-IX)	0	0	0	0
O75694	Nuclear pore complex protein Nup155 (155 kDa nucleoporin) (Nucleoporin Nup155)	0	0	0	0
Q8NI60	Atypical kinase COQ8A, mitochondrial (EC 2.7.-.-) (Chaperone activity of bc1 complex-like) (Chaperone-ABC1-like) (Coenzyme Q protein 8A) (aarF domain-containing protein kinase 3)	0	0	0	0
Q86VP6	Cullin-associated NEDD8-dissociated protein 1 (Cullin-associated and neddylation-dissociated protein 1) (TBP-interacting protein of 120 kDa A) (TBP-interacting protein 120A) (p120 CAND1)	0	0	0	0
P11216	Glycogen phosphorylase, brain form (EC 2.4.1.1)	0	0	0	0
Q96HN2	Adenosylhomocysteinase 3 (AdoHcyase 3) (EC 3.3.1.1) (IP(3)Rs binding protein released with IP(3) 2) (IRBIT2) (Long-IRBIT) (S-adenosyl-L-homocysteine hydrolase 3) (S-adenosylhomocysteine hydrolase-like protein 2)	0	0	0	0
Q86XE5	4-hydroxy-2-oxoglutarate aldolase, mitochondrial (EC 4.1.3.16) (Dihydrodipicolinate synthase-like) (DHDPS-like protein) (Probable 2-keto-4-hydroxyglutarate aldolase) (Probable KHG-aldolase) (Protein 569272)	0	0	0	0
Q8TC12	Retinol dehydrogenase 11 (EC 1.1.1.300) (Androgen-regulated short-chain dehydrogenase/reductase 1) (HCV core-binding protein HCBP12) (Prostate short-chain dehydrogenase/reductase 1) (Retinal reductase 1) (RalR1) (Short chain dehydrogenase/reductase family 7C member 1)	0	0	Yes	0
O43660	Pleiotropic regulator 1	0	0	0	0
Q15006	ER membrane protein complex subunit 2 (Tetratricopeptide repeat protein 35) (TPR repeat protein 35)	0	0	0	0
Q02338	D-beta-hydroxybutyrate dehydrogenase, mitochondrial (EC 1.1.1.30) (3-hydroxybutyrate dehydrogenase) (BDH) (Short chain dehydrogenase/reductase family 9C member 1)	0	0	0	0
Q9NZJ7	Mitochondrial carrier homolog 1 (Presenilin-associated protein)	0	0	0	0
P34949	Mannose-6-phosphate isomerase (EC 5.3.1.8) (Phosphohexomutase) (Phosphomannose isomerase) (PMI)	0	0	0	0
Q9H3P7	Golgi resident protein GCP60 (Acyl-CoA-binding domain-containing protein 3) (Golgi complex-associated protein 1) (GOCAP1) (Golgi phosphoprotein 1) (GOLPH1) (PBR- and PKA-associated protein 7) (Peripheral benzodiazepine receptor-associated protein PAP7) [Cleaved into: Golgi resident protein GCP60, N-terminally processed]	0	0	0	0
O95470	Sphingosine-1-phosphate lyase 1 (S1PL) (SP-lyase 1) (SPL 1) (hSPL) (EC 4.1.2.27) (Sphingosine-1-phosphate aldolase)	0	0	0	0
P62306	Small nuclear ribonucleoprotein F (snRNP-F) (Sm protein F) (Sm-F) (SmF)	0	0	0	0
P29590	Protein PML (Promyelocytic leukemia protein) (RING finger protein 71) (Tripartite motif-containing protein 19)	0	0	0	0
Q99969	Retinoic acid receptor responder protein 2 (Chemerin) (RAR-responsive protein TIG2) (Tazarotene-induced gene 2 protein)	0	0	0	0
Q13642	Four and a half LIM domains protein 1 (FHL-1) (Skeletal muscle LIM-protein 1) (SLIM) (SLIM-1)	0	0	0	0
P80748	Immunoglobulin lambda variable 3-21 (Ig lambda chain V-III region LOI) (Ig lambda chain V-V region DEL) (Ig lambda chain V-VII region MOT)	0	0	0	0
Q9C0E8	Endoplasmic reticulum junction formation protein lunapark (ER junction formation factor lunapark)	0	0	0	Yes
O00401	Neural Wiskott-Aldrich syndrome protein (N-WASP)	0	0	0	0
P17174	Aspartate aminotransferase, cytoplasmic (cAspAT) (EC 2.6.1.1) (EC 2.6.1.3) (Cysteine aminotransferase, cytoplasmic) (Cysteine transaminase, cytoplasmic) (cCAT) (Glutamate oxaloacetate transaminase 1) (Transaminase A)	0	0	0	0
P39060	Collagen alpha-1(XVIII) chain [Cleaved into: Endostatin; Non-collagenous domain 1 (NC1)]	Yes	Collagens	0	Yes
Q14444	Caprin-1 (Cell cycle-associated protein 1) (Cytoplasmic activation- and proliferation-associated protein 1) (GPI-anchored membrane protein 1) (GPI-anchored protein p137) (GPI-p137) (p137GPI) (Membrane component chromosome 11 surface marker 1) (RNA granule protein 105)	0	0	0	0
Q9Y337	Kallikrein-5 (EC 3.4.21.-) (Kallikrein-like protein 2) (KLK-L2) (Stratum corneum tryptic enzyme)	0	0	Yes	0
Q8TF65	PDZ domain-containing protein GIPC2	0	0	0	0
P01033	Metalloproteinase inhibitor 1 (Erythroid-potentiating activity) (EPA) (Fibroblast collagenase inhibitor) (Collagenase inhibitor) (Tissue inhibitor of metalloproteinases 1) (TIMP-1)	Yes	ECM regulators	0	0
Q9H479	Fructosamine-3-kinase (EC 2.7.1.171) (Protein-psicosamine 3-kinase FN3K) (Protein-ribulosamine 3-kinase FN3K) (EC 2.7.1.172)	0	0	0	0
P02462	Collagen alpha-1(IV) chain [Cleaved into: Arresten]	Yes	Collagens	0	Yes
Q9NZ08	Endoplasmic reticulum aminopeptidase 1 (EC 3.4.11.-) (ARTS-1) (Adipocyte-derived leucine aminopeptidase) (A-LAP) (Aminopeptidase PILS) (Puromycin-insensitive leucyl-specific aminopeptidase) (PILS-AP) (Type 1 tumor necrosis factor receptor shedding aminopeptidase regulator)	0	0	Yes	0
P01111	GTPase NRas (EC 3.6.5.2) (Transforming protein N-Ras)	0	0	0	0
Q13595	Transformer-2 protein homolog alpha (TRA-2 alpha) (TRA2-alpha) (Transformer-2 protein homolog A)	0	0	0	Yes
Q15075	Early endosome antigen 1 (Endosome-associated protein p162) (Zinc finger FYVE domain-containing protein 2)	0	0	Yes	Yes
P49792	E3 SUMO-protein ligase RanBP2 (EC 2.3.2.-) (358 kDa nucleoporin) (Nuclear pore complex protein Nup358) (Nucleoporin Nup358) (Ran-binding protein 2) (RanBP2) (p270)	0	0	Yes	0
P32004	Neural cell adhesion molecule L1 (N-CAM-L1) (NCAM-L1) (CD antigen CD171)	0	0	Yes	0
Q9Y5K5	Ubiquitin carboxyl-terminal hydrolase isozyme L5 (UCH-L5) (EC 3.4.19.12) (Ubiquitin C-terminal hydrolase UCH37) (Ubiquitin thioesterase L5)	0	0	0	0
Q9NR28	Diablo homolog, mitochondrial (Direct IAP-binding protein with low pI) (Second mitochondria-derived activator of caspase) (Smac)	0	0	0	0
Q9H9P8	L-2-hydroxyglutarate dehydrogenase, mitochondrial (EC 1.1.99.2) (Duranin)	0	0	0	0
Q9BZE4	Nucleolar GTP-binding protein 1 (Chronic renal failure gene protein) (GTP-binding protein NGB)	0	0	0	0
Q13825	Methylglutaconyl-CoA hydratase, mitochondrial (EC 4.2.1.18) (AU-specific RNA-binding enoyl-CoA hydratase) (AU-binding protein/enoyl-CoA hydratase) (Itaconyl-CoA hydratase) (EC 4.2.1.56)	0	0	0	0
Q8IWA5	Choline transporter-like protein 2 (Solute carrier family 44 member 2)	0	0	0	0
P61619	Protein transport protein Sec61 subunit alpha isoform 1 (Sec61 alpha-1)	0	0	0	0
O14957	Cytochrome b-c1 complex subunit 10 (Complex III subunit 10) (Complex III subunit XI) (Ubiquinol-cytochrome c reductase complex 6.4 kDa protein)	0	0	0	0
Q9NTI5	Sister chromatid cohesion protein PDS5 homolog B (Androgen-induced proliferation inhibitor) (Androgen-induced prostate proliferative shutoff-associated protein AS3)	0	0	0	0
P12532	Creatine kinase U-type, mitochondrial (EC 2.7.3.2) (Acidic-type mitochondrial creatine kinase) (Mia-CK) (Ubiquitous mitochondrial creatine kinase) (U-MtCK)	0	0	0	0
Q8WVV9	Heterogeneous nuclear ribonucleoprotein L-like (hnRNPLL) (Stromal RNA-regulating factor)	0	0	0	0
Q9P015	39S ribosomal protein L15, mitochondrial (L15mt) (MRP-L15) (Mitochondrial large ribosomal subunit protein uL15m)	0	0	0	0
Q92599	Septin-8	0	0	0	0
P06756	Integrin alpha-V (Vitronectin receptor) (Vitronectin receptor subunit alpha) (CD antigen CD51) [Cleaved into: Integrin alpha-V heavy chain; Integrin alpha-V light chain]	0	0	Yes	0
Q8TAQ2	SWI/SNF complex subunit SMARCC2 (BRG1-associated factor 170) (BAF170) (SWI/SNF complex 170 kDa subunit) (SWI/SNF-related matrix-associated actin-dependent regulator of chromatin subfamily C member 2)	0	0	Yes	0
Q15436	Protein transport protein Sec23A (hSec23A) (SEC23-related protein A)	0	0	0	0
Q9NVH1	DnaJ homolog subfamily C member 11	0	0	Yes	0
P26022	Pentraxin-related protein PTX3 (Pentaxin-related protein PTX3) (Tumor necrosis factor alpha-induced protein 5) (TNF alpha-induced protein 5) (Tumor necrosis factor-inducible gene 14 protein) (TSG-14)	0	0	Yes	0
Q08945	FACT complex subunit SSRP1 (Chromatin-specific transcription elongation factor 80 kDa subunit) (Facilitates chromatin transcription complex 80 kDa subunit) (FACT 80 kDa subunit) (FACTp80) (Facilitates chromatin transcription complex subunit SSRP1) (Recombination signal sequence recognition protein 1) (Structure-specific recognition protein 1) (hSSRP1) (T160)	0	0	0	0
P48509	CD151 antigen (GP27) (Membrane glycoprotein SFA-1) (Platelet-endothelial tetraspan antigen 3) (PETA-3) (Tetraspanin-24) (Tspan-24) (CD antigen CD151)	0	0	0	0
Q9UBR2	Cathepsin Z (EC 3.4.18.1) (Cathepsin P) (Cathepsin X)	Yes	ECM regulators	0	0
Q5JTJ3	Cytochrome c oxidase assembly factor 6 homolog	0	0	0	0
Q3LXA3	Triokinase/FMN cyclase (Bifunctional ATP-dependent dihydroxyacetone kinase/FAD-AMP lyase (cyclizing)) [Includes: ATP-dependent dihydroxyacetone kinase (DHA kinase) (EC 2.7.1.28) (EC 2.7.1.29) (Glycerone kinase) (Triokinase) (Triose kinase); FAD-AMP lyase (cyclizing) (EC 4.6.1.15) (FAD-AMP lyase (cyclic FMN forming)) (FMN cyclase)]	0	0	0	0
P57088	Transmembrane protein 33 (Protein DB83) (SHINC-3)	0	0	0	0
P41208	Centrin-2 (Caltractin isoform 1)	0	0	0	0
Q99805	Transmembrane 9 superfamily member 2 (p76)	0	0	0	0
Q9UHQ4	B-cell receptor-associated protein 29 (BCR-associated protein 29) (Bap29)	0	0	0	0
O43491	Band 4.1-like protein 2 (Erythrocyte membrane protein band 4.1-like 2) (Generally expressed protein 4.1) (4.1G)	0	0	0	0
Q9Y5X1	Sorting nexin-9 (SH3 and PX domain-containing protein 1) (Protein SDP1) (SH3 and PX domain-containing protein 3A)	0	0	0	0
Q9GZT6	Coiled-coil domain-containing protein 90B, mitochondrial	0	0	0	0
Q9Y6R1	Electrogenic sodium bicarbonate cotransporter 1 (Sodium bicarbonate cotransporter) (Na(+)/HCO3(-) cotransporter) (Solute carrier family 4 member 4) (kNBC1)	0	0	0	Yes
P09497	Clathrin light chain B (Lcb)	0	0	0	0
Q9H8Y8	Golgi reassembly-stacking protein 2 (GRS2) (Golgi phosphoprotein 6) (GOLPH6) (Golgi reassembly-stacking protein of 55 kDa) (GRASP55) (p59)	0	0	0	0
O96008	Mitochondrial import receptor subunit TOM40 homolog (Protein Haymaker) (Translocase of outer membrane 40 kDa subunit homolog) (p38.5)	0	0	0	0
O60216	Double-strand-break repair protein rad21 homolog (hHR21) (Nuclear matrix protein 1) (NXP-1) (SCC1 homolog) [Cleaved into: 64-kDa C-terminal product (64-kDa carboxy-terminal product) (65-kDa carboxy-terminal product)]	0	0	0	0
Q9H3Z4	DnaJ homolog subfamily C member 5 (Ceroid-lipofuscinosis neuronal protein 4) (Cysteine string protein) (CSP)	0	0	0	Yes
Q14195	Dihydropyrimidinase-related protein 3 (DRP-3) (Collapsin response mediator protein 4) (CRMP-4) (Unc-33-like phosphoprotein 1) (ULIP-1)	0	0	0	0
P04275	von Willebrand factor (vWF) [Cleaved into: von Willebrand antigen 2 (von Willebrand antigen II)]	Yes	ECM glycoproteins	Yes	0
P15374	Ubiquitin carboxyl-terminal hydrolase isozyme L3 (UCH-L3) (EC 3.4.19.12) (Ubiquitin thioesterase L3)	0	0	0	0
Q9Y2A7	Nck-associated protein 1 (NAP 1) (Membrane-associated protein HEM-2) (p125Nap1)	0	0	0	0
Q7Z2W4	Zinc finger CCCH-type antiviral protein 1 (ADP-ribosyltransferase diphtheria toxin-like 13) (ARTD13) (Inactive Poly [ADP-ribose] polymerase 13) (PARP13) (Zinc finger CCCH domain-containing protein 2) (Zinc finger antiviral protein) (ZAP)	0	0	0	0
P58107	Epiplakin (450 kDa epidermal antigen)	0	0	0	Yes
Q9BZZ5	Apoptosis inhibitor 5 (API-5) (Antiapoptosis clone 11 protein) (AAC-11) (Cell migration-inducing gene 8 protein) (Fibroblast growth factor 2-interacting factor) (FIF) (Protein XAGL)	0	0	0	0
P51688	N-sulphoglucosamine sulphohydrolase (EC 3.10.1.1) (Sulfoglucosamine sulfamidase) (Sulphamidase)	0	0	Yes	0
Q9Y4Z0	U6 snRNA-associated Sm-like protein LSm4 (Glycine-rich protein) (GRP)	0	0	0	0
Q02487	Desmocollin-2 (Cadherin family member 2) (Desmocollin-3) (Desmosomal glycoprotein II) (Desmosomal glycoprotein III)	0	0	Yes	0
Q14974	Importin subunit beta-1 (Importin-90) (Karyopherin subunit beta-1) (Nuclear factor p97) (Pore targeting complex 97 kDa subunit) (PTAC97)	0	0	0	0
Q9Y365	START domain-containing protein 10 (StARD10) (Antigen NY-CO-28) (PCTP-like protein) (PCTP-L) (Serologically defined colon cancer antigen 28) (StAR-related lipid transfer protein 10)	0	0	0	0
Q9NUU7	ATP-dependent RNA helicase DDX19A (EC 3.6.4.13) (DDX19-like protein) (DEAD box protein 19A)	0	0	0	0
P11233	Ras-related protein Ral-A (EC 3.6.5.2)	0	0	0	0
P12235	ADP/ATP translocase 1 (ADP,ATP carrier protein 1) (ADP,ATP carrier protein, heart/skeletal muscle isoform T1) (Adenine nucleotide translocator 1) (ANT 1) (Solute carrier family 25 member 4)	0	0	0	0
Q9Y2R5	28S ribosomal protein S17, mitochondrial (MRP-S17) (S17mt) (Mitochondrial small ribosomal subunit protein uS17m)	0	0	0	0
Q86Y82	Syntaxin-12	0	0	0	0
Q92688	Acidic leucine-rich nuclear phosphoprotein 32 family member B (Acidic protein rich in leucines) (Putative HLA-DR-associated protein I-2) (PHAPI2) (Silver-stainable protein SSP29)	0	0	0	0
O14672	Disintegrin and metalloproteinase domain-containing protein 10 (ADAM 10) (EC 3.4.24.81) (CDw156) (Kuzbanian protein homolog) (Mammalian disintegrin-metalloprotease) (CD antigen CD156c)	Yes	ECM regulators	Yes	0
O14617	AP-3 complex subunit delta-1 (AP-3 complex subunit delta) (Adaptor-related protein complex 3 subunit delta-1) (Delta-adaptin)	0	0	0	0
Q15286	Ras-related protein Rab-35 (GTP-binding protein RAY) (Ras-related protein Rab-1C)	0	0	0	0
O00330	Pyruvate dehydrogenase protein X component, mitochondrial (Dihydrolipoamide dehydrogenase-binding protein of pyruvate dehydrogenase complex) (E3-binding protein) (E3BP) (Lipoyl-containing pyruvate dehydrogenase complex component X) (proX)	0	0	0	0
Q99757	Thioredoxin, mitochondrial (MTRX) (Mt-Trx) (Thioredoxin-2)	0	0	0	0
P09327	Villin-1	0	0	0	0
Q9NTK5	Obg-like ATPase 1 (DNA damage-regulated overexpressed in cancer 45) (DOC45) (GTP-binding protein 9)	0	0	Yes	0
P25325	3-mercaptopyruvate sulfurtransferase (MST) (EC 2.8.1.2)	0	0	0	0
P17844	Probable ATP-dependent RNA helicase DDX5 (EC 3.6.4.13) (DEAD box protein 5) (RNA helicase p68)	0	0	0	0
Q9Y276	Mitochondrial chaperone BCS1 (h-BCS1) (BCS1-like protein)	0	0	0	0
Q9BU23	Lipase maturation factor 2 (Transmembrane protein 112B) (Transmembrane protein 153)	0	0	Yes	0
Q9BW27	Nuclear pore complex protein Nup85 (85 kDa nucleoporin) (FROUNT) (Nucleoporin Nup75) (Nucleoporin Nup85) (Pericentrin-1)	0	0	0	0
Q9BQ61	Telomerase RNA component interacting RNase (EC 3.1.13.-) (Exoribonuclease TRIR)	0	0	0	0
P02774	Vitamin D-binding protein (DBP) (VDB) (Gc protein-derived macrophage activating factor) (Gc-MAF) (GcMAF) (Gc-globulin) (Group-specific component) (Gc) (Vitamin D-binding protein-macrophage activating factor) (DBP-maf)	0	0	0	0
Q8N2F6	Armadillo repeat-containing protein 10 (Splicing variant involved in hepatocarcinogenesis protein)	0	0	0	0
P22102	Trifunctional purine biosynthetic protein adenosine-3 [Includes: Phosphoribosylamine--glycine ligase (EC 6.3.4.13) (Glycinamide ribonucleotide synthetase) (GARS) (Phosphoribosylglycinamide synthetase); Phosphoribosylformylglycinamidine cyclo-ligase (EC 6.3.3.1) (AIR synthase) (AIRS) (Phosphoribosyl-aminoimidazole synthetase); Phosphoribosylglycinamide formyltransferase (EC 2.1.2.2) (5'-phosphorib…	0	0	0	0
Q86U28	Iron-sulfur cluster assembly 2 homolog, mitochondrial (HESB-like domain-containing protein 1)	0	0	0	0
Q7Z7G0	Target of Nesh-SH3 (Tarsh) (ABI gene family member 3-binding protein) (Nesh-binding protein) (NeshBP)	Yes	ECM glycoproteins	Yes	0
Q04637	Eukaryotic translation initiation factor 4 gamma 1 (eIF-4-gamma 1) (eIF-4G 1) (eIF-4G1) (p220)	0	0	0	Yes
P53367	Arfaptin-1 (ADP-ribosylation factor-interacting protein 1)	0	0	0	0
Q9UJW0	Dynactin subunit 4 (Dyn4) (Dynactin subunit p62)	0	0	0	0
Q9HD45	Transmembrane 9 superfamily member 3 (EP70-P-iso) (SM-11044-binding protein)	0	0	Yes	0
P55265	Double-stranded RNA-specific adenosine deaminase (DRADA) (EC 3.5.4.37) (136 kDa double-stranded RNA-binding protein) (p136) (Interferon-inducible protein 4) (IFI-4) (K88DSRBP)	0	0	0	0
O60841	Eukaryotic translation initiation factor 5B (eIF-5B) (EC 3.6.5.3) (Translation initiation factor IF-2)	0	0	0	Yes
O43615	Mitochondrial import inner membrane translocase subunit TIM44	0	0	0	0
P10620	Microsomal glutathione S-transferase 1 (Microsomal GST-1) (EC 2.5.1.18) (Microsomal GST-I)	0	0	0	0
Q9HBH5	Retinol dehydrogenase 14 (EC 1.1.1.300) (Alcohol dehydrogenase PAN2) (Short chain dehydrogenase/reductase family 7C member 4)	0	0	0	0
P13569	Cystic fibrosis transmembrane conductance regulator (CFTR) (ATP-binding cassette sub-family C member 7) (Channel conductance-controlling ATPase) (EC 5.6.1.6) (cAMP-dependent chloride channel)	0	0	0	0
O00232	26S proteasome non-ATPase regulatory subunit 12 (26S proteasome regulatory subunit RPN5) (26S proteasome regulatory subunit p55)	0	0	0	0
P13716	Delta-aminolevulinic acid dehydratase (ALADH) (EC 4.2.1.24) (Porphobilinogen synthase)	0	0	0	0
Q13505	Metaxin-1 (Mitochondrial outer membrane import complex protein 1)	0	0	0	0
Q9Y6Y8	SEC23-interacting protein (p125)	0	0	0	0
P60059	Protein transport protein Sec61 subunit gamma	0	0	0	0
P25685	DnaJ homolog subfamily B member 1 (DnaJ protein homolog 1) (Heat shock 40 kDa protein 1) (HSP40) (Heat shock protein 40) (Human DnaJ protein 1) (hDj-1)	0	0	0	0
P01031	Complement C5 (C3 and PZP-like alpha-2-macroglobulin domain-containing protein 4) [Cleaved into: Complement C5 beta chain; Complement C5 alpha chain; C5a anaphylatoxin; Complement C5 alpha' chain]	0	0	Yes	0
P17096	High mobility group protein HMG-I/HMG-Y (HMG-I(Y)) (High mobility group AT-hook protein 1) (High mobility group protein A1) (High mobility group protein R)	0	0	0	0
Q01628	Interferon-induced transmembrane protein 3 (Dispanin subfamily A member 2b) (DSPA2b) (Interferon-inducible protein 1-8U)	0	0	0	0
Q6P1A2	Lysophospholipid acyltransferase 5 (LPLAT 5) (EC 2.3.1.-) (1-acylglycerophosphocholine O-acyltransferase) (EC 2.3.1.23) (1-acylglycerophosphoethanolamine O-acyltransferase) (EC 2.3.1.n7) (1-acylglycerophosphoserine O-acyltransferase) (EC 2.3.1.n6) (Lysophosphatidylcholine acyltransferase) (LPCAT) (Lyso-PC acyltransferase) (Lysophosphatidylcholine acyltransferase 3) (Lyso-PC acyltransferase 3) (Ly…	0	0	0	0
Q9H0N5	Pterin-4-alpha-carbinolamine dehydratase 2 (PHS 2) (EC 4.2.1.96) (4-alpha-hydroxy-tetrahydropterin dehydratase 2) (DcoH-like protein DCoHm) (Dimerization cofactor of hepatocyte nuclear factor 1 from muscle) (HNF-1-alpha dimerization cofactor)	0	0	0	0
Q01130	Serine/arginine-rich splicing factor 2 (Protein PR264) (Splicing component, 35 kDa) (Splicing factor SC35) (SC-35) (Splicing factor, arginine/serine-rich 2)	0	0	0	0
P01743	Immunoglobulin heavy variable 1-46 (Ig heavy chain V-I region DOT) (Ig heavy chain V-I region HG3) (Ig heavy chain V-I region Mot)	0	0	0	0
Q12797	Aspartyl/asparaginyl beta-hydroxylase (EC 1.14.11.16) (Aspartate beta-hydroxylase) (ASP beta-hydroxylase) (Peptide-aspartate beta-dioxygenase)	0	0	Yes	0
Q14515	SPARC-like protein 1 (High endothelial venule protein) (Hevin) (MAST 9)	Yes	ECM glycoproteins	Yes	0
Q15417	Calponin-3 (Calponin, acidic isoform)	0	0	0	0
Q12846	Syntaxin-4 (Renal carcinoma antigen NY-REN-31)	0	0	0	0
P48449	Lanosterol synthase (EC 5.4.99.7) (2,3-epoxysqualene--lanosterol cyclase) (Oxidosqualene--lanosterol cyclase) (OSC) (hOSC)	0	0	0	0
Q86UX2	Inter-alpha-trypsin inhibitor heavy chain H5 (ITI heavy chain H5) (ITI-HC5) (Inter-alpha-inhibitor heavy chain 5)	Yes	ECM regulators	Yes	0
P45954	Short/branched chain specific acyl-CoA dehydrogenase, mitochondrial (SBCAD) (EC 1.3.8.5) (2-methyl branched chain acyl-CoA dehydrogenase) (2-MEBCAD) (2-methylbutyryl-coenzyme A dehydrogenase) (2-methylbutyryl-CoA dehydrogenase)	0	0	0	0
Q7Z434	Mitochondrial antiviral-signaling protein (MAVS) (CARD adapter inducing interferon beta) (Cardif) (Interferon beta promoter stimulator protein 1) (IPS-1) (Putative NF-kappa-B-activating protein 031N) (Virus-induced-signaling adapter) (VISA)	0	0	0	0
P60033	CD81 antigen (26 kDa cell surface protein TAPA-1) (Target of the antiproliferative antibody 1) (Tetraspanin-28) (Tspan-28) (CD antigen CD81)	0	0	0	0
P28062	Proteasome subunit beta type-8 (EC 3.4.25.1) (Low molecular mass protein 7) (Macropain subunit C13) (Multicatalytic endopeptidase complex subunit C13) (Proteasome component C13) (Proteasome subunit beta-5i) (Really interesting new gene 10 protein)	0	0	0	0
Q13131	5'-AMP-activated protein kinase catalytic subunit alpha-1 (AMPK subunit alpha-1) (EC 2.7.11.1) (Acetyl-CoA carboxylase kinase) (ACACA kinase) (EC 2.7.11.27) (Hydroxymethylglutaryl-CoA reductase kinase) (HMGCR kinase) (EC 2.7.11.31) (Tau-protein kinase PRKAA1) (EC 2.7.11.26)	0	0	0	0
P13284	Gamma-interferon-inducible lysosomal thiol reductase (EC 1.8.-.-) (Gamma-interferon-inducible protein IP-30) (Legumaturain)	0	0	0	0
O43760	Synaptogyrin-2 (Cellugyrin)	0	0	0	0
Q03518	Antigen peptide transporter 1 (APT1) (EC 7.4.2.-) (ATP-binding cassette sub-family B member 2) (Peptide supply factor 1) (Peptide transporter PSF1) (PSF-1) (Peptide transporter TAP1) (Peptide transporter involved in antigen processing 1) (Really interesting new gene 4 protein) (RING4)	0	0	0	0
Q3ZCQ8	Mitochondrial import inner membrane translocase subunit TIM50	0	0	0	0
Q13200	26S proteasome non-ATPase regulatory subunit 2 (26S proteasome regulatory subunit RPN1) (26S proteasome regulatory subunit S2) (26S proteasome subunit p97) (Protein 55.11) (Tumor necrosis factor type 1 receptor-associated protein 2)	0	0	0	0
Q14435	Polypeptide N-acetylgalactosaminyltransferase 3 (EC 2.4.1.41) (Polypeptide GalNAc transferase 3) (GalNAc-T3) (pp-GaNTase 3) (Protein-UDP acetylgalactosaminyltransferase 3) (UDP-GalNAc:polypeptide N-acetylgalactosaminyltransferase 3)	0	0	Yes	0
Q71DI3	Histone H3.2 (H3-clustered histone 13) (H3-clustered histone 14) (H3-clustered histone 15) (Histone H3/m) (Histone H3/o)	0	0	0	0
Q92925	SWI/SNF-related matrix-associated actin-dependent regulator of chromatin subfamily D member 2 (60 kDa BRG-1/Brm-associated factor subunit B) (BRG1-associated factor 60B) (BAF60B)	0	0	0	0
P00533	Epidermal growth factor receptor (EC 2.7.10.1) (Proto-oncogene c-ErbB-1) (Receptor tyrosine-protein kinase erbB-1)	0	0	Yes	0
P42766	60S ribosomal protein L35 (Large ribosomal subunit protein uL29)	0	0	0	0
Q9NX58	Cell growth-regulating nucleolar protein	0	0	0	0
Q9BVM4	Gamma-glutamylaminecyclotransferase (GGACT) (EC 4.3.2.8) (AIG2-like domain-containing protein 1) (Gamma-glutamylamine cyclotransferase)	0	0	0	0
P82663	28S ribosomal protein S25, mitochondrial (MRP-S25) (S25mt) (Mitochondrial small ribosomal subunit protein mS25)	0	0	0	0
P54687	Branched-chain-amino-acid aminotransferase, cytosolic (BCAT(c)) (EC 2.6.1.42) (Protein ECA39)	0	0	0	0
P25940	Collagen alpha-3(V) chain	Yes	Collagens	Yes	0
P49902	Cytosolic purine 5'-nucleotidase (EC 3.1.3.5) (Cytosolic 5'-nucleotidase II)	0	0	0	0
O95721	Synaptosomal-associated protein 29 (SNAP-29) (Soluble 29 kDa NSF attachment protein) (Vesicle-membrane fusion protein SNAP-29)	0	0	0	0
P05060	Secretogranin-1 (Chromogranin-B) (CgB) (Secretogranin I) (SgI) [Cleaved into: PE-11; GAWK peptide; CCB peptide]	0	0	0	0
Q8IV08	5'-3' exonuclease PLD3 (EC 3.1.16.1) (Choline phosphatase 3) (HindIII K4L homolog) (Hu-K4) (Phosphatidylcholine-hydrolyzing phospholipase D3) (Phospholipase D3) (PLD 3)	0	0	Yes	0
Q9BYD1	39S ribosomal protein L13, mitochondrial (L13mt) (MRP-L13) (Mitochondrial large ribosomal subunit protein uL13m)	0	0	0	0
P17252	Protein kinase C alpha type (PKC-A) (PKC-alpha) (EC 2.7.11.13)	0	0	0	0
P30047	GTP cyclohydrolase 1 feedback regulatory protein (GFRP) (GTP cyclohydrolase I feedback regulatory protein) (p35)	0	0	0	0
Q92900	Regulator of nonsense transcripts 1 (EC 3.6.4.-) (ATP-dependent helicase RENT1) (Nonsense mRNA reducing factor 1) (NORF1) (Up-frameshift suppressor 1 homolog) (hUpf1)	0	0	0	0
Q8NFH4	Nucleoporin Nup37 (p37) (Nup107-160 subcomplex subunit Nup37)	0	0	0	0
O43290	U4/U6.U5 tri-snRNP-associated protein 1 (SNU66 homolog) (hSnu66) (Squamous cell carcinoma antigen recognized by T-cells 1) (SART-1) (hSART-1) (U4/U6.U5 tri-snRNP-associated 110 kDa protein) (allergen Hom s 1)	0	0	0	0
Q96AP7	Endothelial cell-selective adhesion molecule	0	0	Yes	0
P29972	Aquaporin-1 (AQP-1) (Aquaporin-CHIP) (Urine water channel) (Water channel protein for red blood cells and kidney proximal tubule)	0	0	0	0
Q13148	TAR DNA-binding protein 43 (TDP-43)	0	0	0	0
Q96HY7	Probable 2-oxoglutarate dehydrogenase E1 component DHKTD1, mitochondrial (EC 1.2.4.2) (Dehydrogenase E1 and transketolase domain-containing protein 1)	0	0	0	0
Q86TM6	E3 ubiquitin-protein ligase synoviolin (EC 2.3.2.27) (RING-type E3 ubiquitin transferase synoviolin) (Synovial apoptosis inhibitor 1)	0	0	0	0
Q00765	Receptor expression-enhancing protein 5 (Polyposis locus protein 1) (Protein TB2)	0	0	Yes	0
Q9HC07	Transmembrane protein 165 (Transmembrane protein PT27) (Transmembrane protein TPARL)	0	0	0	0
O43674	NADH dehydrogenase [ubiquinone] 1 beta subcomplex subunit 5, mitochondrial (Complex I-SGDH) (CI-SGDH) (NADH-ubiquinone oxidoreductase SGDH subunit)	0	0	0	0
Q68EM7	Rho GTPase-activating protein 17 (Rho-type GTPase-activating protein 17) (RhoGAP interacting with CIP4 homologs protein 1) (RICH-1)	0	0	Yes	0
P67812	Signal peptidase complex catalytic subunit SEC11A (EC 3.4.21.89) (Endopeptidase SP18) (Microsomal signal peptidase 18 kDa subunit) (SPase 18 kDa subunit) (SEC11 homolog A) (SEC11-like protein 1) (SPC18)	0	0	0	0
Q8TDB6	E3 ubiquitin-protein ligase DTX3L (EC 2.3.2.27) (B-lymphoma- and BAL-associated protein) (Protein deltex-3-like) (RING-type E3 ubiquitin transferase DTX3L) (Rhysin-2) (Rhysin2)	0	0	0	0
Q9NZ01	Very-long-chain enoyl-CoA reductase (EC 1.3.1.93) (Synaptic glycoprotein SC2) (Trans-2,3-enoyl-CoA reductase) (TER)	0	0	0	0
Q14746	Conserved oligomeric Golgi complex subunit 2 (COG complex subunit 2) (Component of oligomeric Golgi complex 2) (Low density lipoprotein receptor defect C-complementing protein)	0	0	0	0
P19075	Tetraspanin-8 (Tspan-8) (Transmembrane 4 superfamily member 3) (Tumor-associated antigen CO-029)	0	0	Yes	0
P43007	Neutral amino acid transporter A (Alanine/serine/cysteine/threonine transporter 1) (ASCT-1) (SATT) (Solute carrier family 1 member 4)	0	0	0	0
Q96GQ5	RUS family member 1	0	0	0	0
P30876	DNA-directed RNA polymerase II subunit RPB2 (EC 2.7.7.6) (DNA-directed RNA polymerase II 140 kDa polypeptide) (DNA-directed RNA polymerase II subunit B) (RNA polymerase II subunit 2) (RNA polymerase II subunit B2)	0	0	0	0
P61009	Signal peptidase complex subunit 3 (EC 3.4.-.-) (Microsomal signal peptidase 22/23 kDa subunit) (SPC22/23) (SPase 22/23 kDa subunit)	0	0	0	0
Q15056	Eukaryotic translation initiation factor 4H (eIF-4H) (Williams-Beuren syndrome chromosomal region 1 protein)	0	0	0	0
Q8IZ83	Aldehyde dehydrogenase family 16 member A1	0	0	0	0
P56381	ATP synthase subunit epsilon, mitochondrial (ATPase subunit epsilon) (ATP synthase F1 subunit epsilon)	0	0	0	0
Q12981	Vesicle transport protein SEC20 (BCL2/adenovirus E1B 19 kDa protein-interacting protein 1) (Transformation-related gene 8 protein) (TRG-8)	0	0	0	0
P62834	Ras-related protein Rap-1A (EC 3.6.5.2) (C21KG) (G-22K) (GTP-binding protein smg p21A) (Ras-related protein Krev-1)	0	0	0	0
P80511	Protein S100-A12 (CGRP) (Calcium-binding protein in amniotic fluid 1) (CAAF1) (Calgranulin-C) (CAGC) (Extracellular newly identified RAGE-binding protein) (EN-RAGE) (Migration inhibitory factor-related protein 6) (MRP-6) (p6) (Neutrophil S100 protein) (S100 calcium-binding protein A12) [Cleaved into: Calcitermin]	Yes	Secreted factors	0	0
Q92905	COP9 signalosome complex subunit 5 (SGN5) (Signalosome subunit 5) (EC 3.4.-.-) (Jun activation domain-binding protein 1)	0	0	0	0
Q9BYJ9	YTH domain-containing family protein 1 (Dermatomyositis associated with cancer putative autoantigen 1) (DACA-1)	0	0	0	0
P21953	2-oxoisovalerate dehydrogenase subunit beta, mitochondrial (EC 1.2.4.4) (Branched-chain alpha-keto acid dehydrogenase E1 component beta chain) (BCKDE1B) (BCKDH E1-beta)	0	0	0	0
Q9P289	Serine/threonine-protein kinase 26 (EC 2.7.11.1) (MST3 and SOK1-related kinase) (Mammalian STE20-like protein kinase 4) (MST-4) (STE20-like kinase MST4) (Serine/threonine-protein kinase MASK)	0	0	0	0
Q07092	Collagen alpha-1(XVI) chain	Yes	Collagens	0	Yes
O75976	Carboxypeptidase D (EC 3.4.17.22) (Metallocarboxypeptidase D) (gp180)	0	0	Yes	0
P37059	17-beta-hydroxysteroid dehydrogenase type 2 (17-beta-HSD 2) (20 alpha-hydroxysteroid dehydrogenase) (20-alpha-HSD) (E2DH) (Estradiol 17-beta-dehydrogenase 2) (EC 1.1.1.62) (Microsomal 17-beta-hydroxysteroid dehydrogenase) (Short chain dehydrogenase/reductase family 9C member 2) (Testosterone 17-beta-dehydrogenase) (EC 1.1.1.239)	0	0	0	0
Q14914	Prostaglandin reductase 1 (PRG-1) (15-oxoprostaglandin 13-reductase) (EC 1.3.1.48) (Dithiolethione-inducible gene 1 protein) (D3T-inducible gene 1 protein) (DIG-1) (Leukotriene B4 12-hydroxydehydrogenase) (NAD(P)H-dependent alkenal/one oxidoreductase) (EC 1.3.1.74)	0	0	0	0
P49589	Cysteine--tRNA ligase, cytoplasmic (EC 6.1.1.16) (Cysteinyl-tRNA synthetase) (CysRS)	0	0	0	0
P48556	26S proteasome non-ATPase regulatory subunit 8 (26S proteasome regulatory subunit RPN12) (26S proteasome regulatory subunit S14) (p31)	0	0	0	0
Q02127	Dihydroorotate dehydrogenase (quinone), mitochondrial (DHOdehase) (EC 1.3.5.2) (Dihydroorotate oxidase)	0	0	0	0
P49406	39S ribosomal protein L19, mitochondrial (L19mt) (MRP-L19) (39S ribosomal protein L15, mitochondrial) (L15mt) (MRP-L15) (Mitochondrial large ribosomal subunit protein bL19m)	0	0	0	0
Q9H7B2	Ribosome production factor 2 homolog (Brix domain-containing protein 1) (Ribosome biogenesis protein RPF2 homolog)	0	0	Yes	0
Q9UDY2	Tight junction protein ZO-2 (Tight junction protein 2) (Zona occludens protein 2) (Zonula occludens protein 2)	0	0	Yes	0
Q96LJ7	Dehydrogenase/reductase SDR family member 1 (EC 1.1.-.-) (Short chain dehydrogenase/reductase family 19C member 1)	0	0	0	0
Q15120	[Pyruvate dehydrogenase (acetyl-transferring)] kinase isozyme 3, mitochondrial (EC 2.7.11.2) (Pyruvate dehydrogenase kinase isoform 3)	0	0	0	0
Q9UH62	Armadillo repeat-containing X-linked protein 3 (ARM protein lost in epithelial cancers on chromosome X 3) (Protein ALEX3)	0	0	0	0
Q13232	Nucleoside diphosphate kinase 3 (NDK 3) (NDP kinase 3) (EC 2.7.4.6) (DR-nm23) (Nucleoside diphosphate kinase C) (NDPKC) (nm23-H3)	0	0	0	0
Q99643	Succinate dehydrogenase cytochrome b560 subunit, mitochondrial (Integral membrane protein CII-3) (QPs-1) (QPs1) (Succinate dehydrogenase complex subunit C) (Succinate-ubiquinone oxidoreductase cytochrome B large subunit) (CYBL)	0	0	0	0
Q92901	60S ribosomal protein L3-like (Large ribosomal subunit protein uL3-like)	0	0	0	0
O60264	SWI/SNF-related matrix-associated actin-dependent regulator of chromatin subfamily A member 5 (SWI/SNF-related matrix-associated actin-dependent regulator of chromatin A5) (EC 3.6.4.-) (Sucrose nonfermenting protein 2 homolog) (hSNF2H)	0	0	0	0
Q8TCS8	Polyribonucleotide nucleotidyltransferase 1, mitochondrial (EC 2.7.7.8) (3'-5' RNA exonuclease OLD35) (PNPase old-35) (Polynucleotide phosphorylase 1) (PNPase 1) (Polynucleotide phosphorylase-like protein)	0	0	0	0
O00410	Importin-5 (Imp5) (Importin subunit beta-3) (Karyopherin beta-3) (Ran-binding protein 5) (RanBP5)	0	0	0	0
Q9C0C2	182 kDa tankyrase-1-binding protein	0	0	0	0
Q6P1N9	Putative deoxyribonuclease TATDN1 (EC 3.1.21.-) (Hepatocarcinoma high expression protein)	0	0	0	0
P61764	Syntaxin-binding protein 1 (MUNC18-1) (N-Sec1) (Protein unc-18 homolog 1) (Unc18-1) (Protein unc-18 homolog A) (Unc-18A) (p67)	0	0	0	0
Q15061	WD repeat-containing protein 43 (U3 small nucleolar RNA-associated protein 5 homolog)	0	0	0	0
Q9UMS6	Synaptopodin-2 (Genethonin-2) (Myopodin)	0	0	0	Yes
Q9Y619	Mitochondrial ornithine transporter 1 (Solute carrier family 25 member 15)	0	0	0	0
Q9Y2Q9	28S ribosomal protein S28, mitochondrial (MRP-S28) (S28mt) (28S ribosomal protein S35, mitochondrial) (MRP-S35) (S35mt) (Mitochondrial small ribosomal subunit protein bS1m)	0	0	0	0
Q96MM6	Heat shock 70 kDa protein 12B	0	0	0	0
Q96S66	Chloride channel CLIC-like protein 1 (Mid-1-related chloride channel protein 1)	0	0	0	0
Q15287	RNA-binding protein with serine-rich domain 1 (SR-related protein LDC2)	0	0	0	0
P02750	Leucine-rich alpha-2-glycoprotein (LRG)	Yes	ECM glycoproteins	Yes	0
O75348	V-type proton ATPase subunit G 1 (V-ATPase subunit G 1) (V-ATPase 13 kDa subunit 1) (Vacuolar proton pump subunit G 1) (Vacuolar proton pump subunit M16)	0	0	0	0
P50135	Histamine N-methyltransferase (HMT) (EC 2.1.1.8)	0	0	0	0
Q9NWU1	3-oxoacyl-[acyl-carrier-protein] synthase, mitochondrial (EC 2.3.1.41) (Beta-ketoacyl-ACP synthase)	0	0	0	0
Q16540	39S ribosomal protein L23, mitochondrial (L23mt) (MRP-L23) (L23 mitochondrial-related protein) (Mitochondrial large ribosomal subunit protein uL23m) (Ribosomal protein L23-like)	0	0	0	0
Q9BRN9	TM2 domain-containing protein 3 (Beta-amyloid-binding protein-like protein 2) (BBP-like protein 2)	0	0	Yes	0
Q2UY09	Collagen alpha-1(XXVIII) chain	Yes	Collagens	Yes	0
Q9BYD3	39S ribosomal protein L4, mitochondrial (L4mt) (MRP-L4) (Mitochondrial large ribosomal subunit protein uL4m)	0	0	0	0
Q8N6T3	ADP-ribosylation factor GTPase-activating protein 1 (ARF GAP 1) (ADP-ribosylation factor 1 GTPase-activating protein) (ARF1 GAP) (ARF1-directed GTPase-activating protein)	0	0	0	0
P26572	Alpha-1,3-mannosyl-glycoprotein 2-beta-N-acetylglucosaminyltransferase (EC 2.4.1.101) (N-glycosyl-oligosaccharide-glycoprotein N-acetylglucosaminyltransferase I) (GNT-I) (GlcNAc-T I)	0	0	0	0
Q15599	Na(+)/H(+) exchange regulatory cofactor NHE-RF2 (NHERF-2) (NHE3 kinase A regulatory protein E3KARP) (SRY-interacting protein 1) (SIP-1) (Sodium-hydrogen exchanger regulatory factor 2) (Solute carrier family 9 isoform A3 regulatory factor 2) (Tyrosine kinase activator protein 1) (TKA-1)	0	0	0	0
Q16576	Histone-binding protein RBBP7 (Histone acetyltransferase type B subunit 2) (Nucleosome-remodeling factor subunit RBAP46) (Retinoblastoma-binding protein 7) (RBBP-7) (Retinoblastoma-binding protein p46)	0	0	0	0
Q8IV36	Protein HID1 (Down-regulated in multiple cancers 1) (HID1 domain-containing protein) (Protein hid-1 homolog)	0	0	0	0
Q15843	NEDD8 (Neddylin) (Neural precursor cell expressed developmentally down-regulated protein 8) (NEDD-8) (Ubiquitin-like protein Nedd8)	0	0	0	0
P51636	Caveolin-2	0	0	0	0
O43264	Centromere/kinetochore protein zw10 homolog	0	0	0	0
O00203	AP-3 complex subunit beta-1 (Adaptor protein complex AP-3 subunit beta-1) (Adaptor-related protein complex 3 subunit beta-1) (Beta-3A-adaptin) (Clathrin assembly protein complex 3 beta-1 large chain)	0	0	0	0
Q99873	Protein arginine N-methyltransferase 1 (EC 2.1.1.319) (Histone-arginine N-methyltransferase PRMT1) (Interferon receptor 1-bound protein 4)	0	0	0	0
Q96NB2	Sideroflexin-2	0	0	0	0
O95782	AP-2 complex subunit alpha-1 (100 kDa coated vesicle protein A) (Adaptor protein complex AP-2 subunit alpha-1) (Adaptor-related protein complex 2 subunit alpha-1) (Alpha-adaptin A) (Alpha1-adaptin) (Clathrin assembly protein complex 2 alpha-A large chain) (Plasma membrane adaptor HA2/AP2 adaptin alpha A subunit)	0	0	0	0
O95232	Luc7-like protein 3 (Cisplatin resistance-associated-overexpressed protein) (Luc7A) (Okadaic acid-inducible phosphoprotein OA48-18) (cAMP regulatory element-associated protein 1) (CRE-associated protein 1) (CREAP-1)	0	0	0	0
Q92614	Unconventional myosin-XVIIIa (Molecule associated with JAK3 N-terminus) (MAJN) (Myosin containing a PDZ domain) (Surfactant protein receptor SP-R210) (SP-R210)	0	0	0	0
Q07954	Prolow-density lipoprotein receptor-related protein 1 (LRP-1) (Alpha-2-macroglobulin receptor) (A2MR) (Apolipoprotein E receptor) (APOER) (CD antigen CD91) [Cleaved into: Low-density lipoprotein receptor-related protein 1 85 kDa subunit (LRP-85); Low-density lipoprotein receptor-related protein 1 515 kDa subunit (LRP-515); Low-density lipoprotein receptor-related protein 1 intracellular domain (L…	0	0	Yes	0
Q5JTH9	RRP12-like protein	0	0	0	0
Q8WUM0	Nuclear pore complex protein Nup133 (133 kDa nucleoporin) (Nucleoporin Nup133)	0	0	Yes	0
Q9NR50	Translation initiation factor eIF-2B subunit gamma (eIF-2B GDP-GTP exchange factor subunit gamma)	0	0	0	0
Q9UHG2	ProSAAS (Proprotein convertase subtilisin/kexin type 1 inhibitor) (Proprotein convertase 1 inhibitor) (pro-SAAS) [Cleaved into: KEP; Big SAAS (b-SAAS); Little SAAS (l-SAAS) (N-proSAAS); Big PEN-LEN (b-PEN-LEN) (SAAS CT(1-49)); PEN; Little LEN (l-LEN); Big LEN (b-LEN) (SAAS CT(25-40))]	0	0	0	0
Q9BUF5	Tubulin beta-6 chain (Tubulin beta class V)	0	0	Yes	0
P06213	Insulin receptor (IR) (EC 2.7.10.1) (CD antigen CD220) [Cleaved into: Insulin receptor subunit alpha; Insulin receptor subunit beta]	0	0	Yes	0
Q9H4A4	Aminopeptidase B (AP-B) (EC 3.4.11.6) (Arginine aminopeptidase) (Arginyl aminopeptidase)	0	0	0	0
Q9Y676	28S ribosomal protein S18b, mitochondrial (MRP-S18-b) (Mrps18-b) (S18mt-b) (28S ribosomal protein S18-2, mitochondrial) (MRP-S18-2) (Mitochondrial small ribosomal subunit protein bS18b) (Mitochondrial small ribosomal subunit protein mS40)	0	0	0	0
P22570	NADPH:adrenodoxin oxidoreductase, mitochondrial (AR) (Adrenodoxin reductase) (EC 1.18.1.6) (Ferredoxin--NADP(+) reductase) (Ferredoxin reductase)	0	0	0	0
Q9HBL7	Plasminogen receptor (KT) (Plg-R(KT))	0	0	0	0
P52948	Nuclear pore complex protein Nup98-Nup96 (EC 3.4.21.-) [Cleaved into: Nuclear pore complex protein Nup98 (98 kDa nucleoporin) (Nucleoporin Nup98) (Nup98); Nuclear pore complex protein Nup96 (96 kDa nucleoporin) (Nucleoporin Nup96) (Nup96)]	0	0	Yes	0
Q6UXN9	WD repeat-containing protein 82 (Protein TMEM113) (Swd2)	0	0	0	0
O95573	Long-chain-fatty-acid--CoA ligase 3 (EC 6.2.1.3) (Arachidonate--CoA ligase) (EC 6.2.1.15) (Long-chain acyl-CoA synthetase 3) (LACS 3)	0	0	0	0
Q9H0U3	Magnesium transporter protein 1 (MagT1) (Dolichyl-diphosphooligosaccharide--protein glycosyltransferase subunit MAGT1) (Oligosaccharyl transferase subunit MAGT1) (Implantation-associated protein) (IAP)	0	0	Yes	0
Q13445	Transmembrane emp24 domain-containing protein 1 (Interleukin-1 receptor-like 1 ligand) (Putative T1/ST2 receptor-binding protein) (p24 family protein gamma-1) (Tp24) (p24gamma1)	0	0	0	0
A0MZ66	Shootin-1 (Shootin1)	0	0	0	0
P14406	Cytochrome c oxidase subunit 7A2, mitochondrial (Cytochrome c oxidase subunit VIIa-liver/heart) (Cytochrome c oxidase subunit VIIa-L) (Cytochrome c oxidase subunit VIIaL)	0	0	0	0
O95747	Serine/threonine-protein kinase OSR1 (EC 2.7.11.1) (Oxidative stress-responsive 1 protein)	0	0	0	0
P47914	60S ribosomal protein L29 (Cell surface heparin-binding protein HIP) (Large ribosomal subunit protein eL29)	0	0	0	0
Q15526	Surfeit locus protein 1	0	0	0	0
P49247	Ribose-5-phosphate isomerase (EC 5.3.1.6) (Phosphoriboisomerase)	0	0	0	Yes
P21926	CD9 antigen (5H9 antigen) (Cell growth-inhibiting gene 2 protein) (Leukocyte antigen MIC3) (Motility-related protein) (MRP-1) (Tetraspanin-29) (Tspan-29) (p24) (CD antigen CD9)	0	0	0	0
Q9NVP1	ATP-dependent RNA helicase DDX18 (EC 3.6.4.13) (DEAD box protein 18) (Myc-regulated DEAD box protein) (MrDb)	0	0	0	0
Q8TCJ2	Dolichyl-diphosphooligosaccharide--protein glycosyltransferase subunit STT3B (Oligosaccharyl transferase subunit STT3B) (STT3-B) (EC 2.4.99.18) (Source of immunodominant MHC-associated peptides homolog)	0	0	Yes	0
Q9Y2D5	A-kinase anchor protein 2 (AKAP-2) (AKAP-KL) (Protein kinase A-anchoring protein 2) (PRKA2)	0	0	0	0
Q16630	Cleavage and polyadenylation specificity factor subunit 6 (Cleavage and polyadenylation specificity factor 68 kDa subunit) (CPSF 68 kDa subunit) (Cleavage factor Im complex 68 kDa subunit) (CFIm68) (Pre-mRNA cleavage factor Im 68 kDa subunit) (Protein HPBRII-4/7)	0	0	0	0
Q15819	Ubiquitin-conjugating enzyme E2 variant 2 (DDVit 1) (Enterocyte differentiation-associated factor 1) (EDAF-1) (Enterocyte differentiation-promoting factor 1) (EDPF-1) (MMS2 homolog) (Vitamin D3-inducible protein)	0	0	0	0
P49326	Flavin-containing monooxygenase 5 (FMO 5) (Baeyer-Villiger monooxygenase 1) (hBVMO1) (EC 1.14.13.-) (Dimethylaniline monooxygenase [N-oxide-forming] 5) (EC 1.14.13.8) (Dimethylaniline oxidase 5) (NAPDH oxidase) (EC 1.6.3.1)	0	0	0	0
P23368	NAD-dependent malic enzyme, mitochondrial (NAD-ME) (EC 1.1.1.38) (Malic enzyme 2)	0	0	0	0
Q9Y2Z9	Ubiquinone biosynthesis monooxygenase COQ6, mitochondrial (EC 1.14.13.-) (Coenzyme Q10 monooxygenase 6)	0	0	0	0
O14561	Acyl carrier protein, mitochondrial (ACP) (CI-SDAP) (NADH-ubiquinone oxidoreductase 9.6 kDa subunit)	0	0	0	0
P01023	Alpha-2-macroglobulin (Alpha-2-M) (C3 and PZP-like alpha-2-macroglobulin domain-containing protein 5)	Yes	ECM regulators	0	0
Q8WW59	SPRY domain-containing protein 4	0	0	0	0
Q9NZM1	Myoferlin (Fer-1-like protein 3)	0	0	0	0
O00178	GTP-binding protein 1 (G-protein 1) (GP-1) (GP1)	0	0	0	0
Q13363	C-terminal-binding protein 1 (CtBP1) (EC 1.1.1.-)	0	0	0	0
P30711	Glutathione S-transferase theta-1 (EC 2.5.1.18) (GST class-theta-1) (Glutathione transferase T1-1)	0	0	0	0
Q13103	Secreted phosphoprotein 24 (Spp-24) (Secreted phosphoprotein 2)	0	0	0	0
Q9Y450	HBS1-like protein (ERFS)	0	0	0	0
O43903	Growth arrest-specific protein 2 (GAS-2)	0	0	0	0
Q9BWF3	RNA-binding protein 4 (Lark homolog) (hLark) (RNA-binding motif protein 4) (RNA-binding motif protein 4a)	0	0	0	0
Q9UN37	Vacuolar protein sorting-associated protein 4A (EC 3.6.4.6) (Protein SKD2) (VPS4-1) (hVPS4)	0	0	0	0
Q9Y4G6	Talin-2	0	0	0	0
Q13586	Stromal interaction molecule 1	0	0	Yes	0
Q9BZE1	39S ribosomal protein L37, mitochondrial (L37mt) (MRP-L37) (39S ribosomal protein L2, mitochondrial) (L2mt) (MRP-L2) (Mitochondrial large ribosomal subunit protein mL37)	0	0	0	0
O00487	26S proteasome non-ATPase regulatory subunit 14 (EC 3.4.19.-) (26S proteasome regulatory subunit RPN11) (26S proteasome-associated PAD1 homolog 1)	0	0	0	0
Q9NXV6	CDKN2A-interacting protein (Collaborator of ARF)	0	0	0	0
Q06828	Fibromodulin (FM) (Collagen-binding 59 kDa protein) (Keratan sulfate proteoglycan fibromodulin) (KSPG fibromodulin)	Yes	Proteoglycans	0	0
P06753	Tropomyosin alpha-3 chain (Gamma-tropomyosin) (Tropomyosin-3) (Tropomyosin-5) (hTM5)	0	0	0	0
Q9Y6G9	Cytoplasmic dynein 1 light intermediate chain 1 (LIC1) (Dynein light chain A) (DLC-A) (Dynein light intermediate chain 1, cytosolic)	0	0	Yes	0
Q13509	Tubulin beta-3 chain (Tubulin beta-4 chain) (Tubulin beta-III)	0	0	Yes	0
Q16629	Serine/arginine-rich splicing factor 7 (Splicing factor 9G8) (Splicing factor, arginine/serine-rich 7)	0	0	0	0
Q9NNW7	Thioredoxin reductase 2, mitochondrial (EC 1.8.1.9) (Selenoprotein Z) (SelZ) (TR-beta) (Thioredoxin reductase TR3)	0	0	0	0
Q9Y5A9	YTH domain-containing family protein 2 (CLL-associated antigen KW-14) (High-glucose-regulated protein 8) (Renal carcinoma antigen NY-REN-2)	0	0	0	0
Q15067	Peroxisomal acyl-coenzyme A oxidase 1 (AOX) (EC 1.3.3.6) (Palmitoyl-CoA oxidase) (Straight-chain acyl-CoA oxidase) (SCOX) [Cleaved into: Peroxisomal acyl-CoA oxidase 1, A chain; Peroxisomal acyl-CoA oxidase 1, B chain; Peroxisomal acyl-CoA oxidase 1, C chain]	0	0	0	0
P02656	Apolipoprotein C-III (Apo-CIII) (ApoC-III) (Apolipoprotein C3)	0	0	0	0
Q99828	Calcium and integrin-binding protein 1 (CIB) (Calcium- and integrin-binding protein) (CIBP) (Calmyrin) (DNA-PKcs-interacting protein) (Kinase-interacting protein) (KIP) (SNK-interacting protein 2-28) (SIP2-28)	0	0	0	0
Q9UN36	Protein NDRG2 (N-myc downstream-regulated gene 2 protein) (Protein Syld709613)	0	0	0	0
P12236	ADP/ATP translocase 3 (ADP,ATP carrier protein 3) (ADP,ATP carrier protein, isoform T2) (ANT 2) (Adenine nucleotide translocator 3) (ANT 3) (Solute carrier family 25 member 6) [Cleaved into: ADP/ATP translocase 3, N-terminally processed]	0	0	0	0
Q13547	Histone deacetylase 1 (HD1) (EC 3.5.1.98)	0	0	Yes	0
P50851	Lipopolysaccharide-responsive and beige-like anchor protein (Beige-like protein) (CDC4-like protein)	0	0	0	0
Q5T1J5	Putative coiled-coil-helix-coiled-coil-helix domain-containing protein CHCHD2P9, mitochondrial (Coiled-coil-helix-coiled-coil-helix domain-containing 2 pseudogene 9)	0	0	0	0
Q9UI10	Translation initiation factor eIF-2B subunit delta (eIF-2B GDP-GTP exchange factor subunit delta)	0	0	0	0
Q9UMR2	ATP-dependent RNA helicase DDX19B (EC 3.6.4.13) (DEAD box RNA helicase DEAD5) (DEAD box protein 19B)	0	0	0	0
Q9UNK0	Syntaxin-8	0	0	0	0
Q5RI15	Cytochrome c oxidase assembly protein COX20, mitochondrial	0	0	0	0
P63162	Small nuclear ribonucleoprotein-associated protein N (snRNP-N) (Sm protein D) (Sm-D) (Sm protein N) (Sm-N) (SmN) (Tissue-specific-splicing protein)	0	0	0	0
P51570	Galactokinase (EC 2.7.1.6) (Galactose kinase)	0	0	0	0
P28288	ATP-binding cassette sub-family D member 3 (70 kDa peroxisomal membrane protein) (PMP70)	0	0	0	0
O75439	Mitochondrial-processing peptidase subunit beta (EC 3.4.24.64) (Beta-MPP) (P-52)	0	0	0	0
[truncated: 1,651 more rows]

## Sheet: Glycans
Glycan.composition	Glycan.Type
HexNAc(1)	Paucimannose
HexNAc(1)Fuc(1)	Fucose
HexNAc(10)Hex(10)Fuc(1)	Fucose
HexNAc(10)Hex(7)	Complex/Hybrid
HexNAc(11)Hex(11)NeuAc(1)	Sialic acid
HexNAc(11)Hex(11)NeuGc(1)	Sialic acid
HexNAc(2)	Paucimannose
HexNAc(2)Fuc(1)	Fucose
HexNAc(2)Hex(1)	Paucimannose
HexNAc(2)Hex(1)Fuc(1)	Fucose
HexNAc(2)Hex(10)	HighMannose
HexNAc(2)Hex(11)	HighMannose
HexNAc(2)Hex(12)	Paucimannose
HexNAc(2)Hex(2)	Paucimannose
HexNAc(2)Hex(2)Fuc(1)	Fucose
HexNAc(2)Hex(3)	Paucimannose
HexNAc(2)Hex(3)Fuc(2)	Fucose
HexNAc(2)Hex(3)Phospho(1)	M-6-P
HexNAc(2)Hex(4)	Paucimannose
HexNAc(2)Hex(4)Fuc(1)	Fucose
HexNAc(2)Hex(4)Phospho(1)	M-6-P
HexNAc(2)Hex(5)	HighMannose
HexNAc(2)Hex(5)Fuc(1)	Fucose
HexNAc(2)Hex(5)Phospho(1)	M-6-P
HexNAc(2)Hex(5)Phospho(2)	M-6-P
HexNAc(2)Hex(6)	HighMannose
HexNAc(2)Hex(6)Phospho(1)	M-6-P
HexNAc(2)Hex(7)	HighMannose
HexNAc(2)Hex(7)Phospho(1)	M-6-P
HexNAc(2)Hex(7)Phospho(2)	M-6-P
HexNAc(2)Hex(8)	HighMannose
HexNAc(2)Hex(8)Phospho(1)	M-6-P
HexNAc(2)Hex(8)Phospho(2)	M-6-P
HexNAc(2)Hex(9)	HighMannose
HexNAc(2)Hex(9)Phospho(1)	M-6-P
HexNAc(2)Hex(9)Phospho(2)	M-6-P
HexNAc(3)Hex(10)	Complex/Hybrid
HexNAc(3)Hex(11)	Complex/Hybrid
HexNAc(3)Hex(12)	Complex/Hybrid
HexNAc(3)Hex(3)	Complex/Hybrid
HexNAc(3)Hex(3)Fuc(1)	Fucose
HexNAc(3)Hex(3)Fuc(2)	Fucose
HexNAc(3)Hex(4)	Complex/Hybrid
HexNAc(3)Hex(4)Fuc(1)	Fucose
HexNAc(3)Hex(4)Fuc(1)NeuAc(1)	Sialic acid
HexNAc(3)Hex(4)Fuc(1)NeuGc(1)	Sialic acid
HexNAc(3)Hex(4)Fuc(2)	Fucose
HexNAc(3)Hex(4)NeuAc(1)	Sialic acid
HexNAc(3)Hex(4)NeuGc(1)	Sialic acid
HexNAc(3)Hex(4)Phospho(1)	M-6-P
HexNAc(3)Hex(4)Phospho(2)	M-6-P
HexNAc(3)Hex(5)	Complex/Hybrid
HexNAc(3)Hex(5)Fuc(1)	Fucose
HexNAc(3)Hex(5)NeuAc(1)	Sialic acid
HexNAc(3)Hex(5)NeuGc(1)	Sialic acid
HexNAc(3)Hex(5)Phospho(1)	M-6-P
HexNAc(3)Hex(5)Phospho(2)	M-6-P
HexNAc(3)Hex(6)	Complex/Hybrid
HexNAc(3)Hex(6)Fuc(1)	Fucose
HexNAc(3)Hex(6)Fuc(1)NeuAc(1)	Sialic acid
HexNAc(3)Hex(6)Fuc(1)NeuGc(1)	Sialic acid
HexNAc(3)Hex(6)NeuAc(1)	Sialic acid
HexNAc(3)Hex(6)NeuGc(1)	Sialic acid
HexNAc(3)Hex(6)Phospho(1)	M-6-P
HexNAc(3)Hex(6)Phospho(2)	M-6-P
HexNAc(3)Hex(7)	Complex/Hybrid
HexNAc(3)Hex(7)Phospho(1)	M-6-P
HexNAc(3)Hex(7)Phospho(2)	M-6-P
HexNAc(3)Hex(8)	Complex/Hybrid
HexNAc(3)Hex(8)Phospho(1)	M-6-P
HexNAc(3)Hex(8)Phospho(2)	M-6-P
HexNAc(3)Hex(9)	Complex/Hybrid
HexNAc(3)Hex(9)Phospho(1)	M-6-P
HexNAc(3)Hex(9)Phospho(2)	M-6-P
HexNAc(4)Hex(3)	Complex/Hybrid
HexNAc(4)Hex(3)Fuc(1)	Fucose
HexNAc(4)Hex(3)Fuc(2)	Fucose
HexNAc(4)Hex(3)Fuc(3)	Fucose
HexNAc(4)Hex(3)NeuAc(1)	Sialic acid
HexNAc(4)Hex(3)NeuGc(1)	Sialic acid
HexNAc(4)Hex(4)	Complex/Hybrid
HexNAc(4)Hex(4)Fuc(1)	Fucose
HexNAc(4)Hex(4)Fuc(1)NeuAc(1)	Sialic acid
HexNAc(4)Hex(4)Fuc(1)NeuGc(1)	Sialic acid
HexNAc(4)Hex(4)Fuc(2)	Fucose
HexNAc(4)Hex(4)Fuc(2)NeuAc(1)	Sialic acid
HexNAc(4)Hex(4)NeuAc(1)	Sialic acid
HexNAc(4)Hex(4)NeuGc(1)	Sialic acid
HexNAc(4)Hex(5)	Complex/Hybrid
HexNAc(4)Hex(5)Fuc(1)	Fucose
HexNAc(4)Hex(5)Fuc(1)NeuAc(1)	Sialic acid
HexNAc(4)Hex(5)Fuc(1)NeuAc(1)NeuGc(1)	Sialic acid
HexNAc(4)Hex(5)Fuc(1)NeuAc(2)	Sialic acid
HexNAc(4)Hex(5)Fuc(2)	Fucose
HexNAc(4)Hex(5)Fuc(2)NeuAc(1)	Sialic acid
HexNAc(4)Hex(5)Fuc(2)NeuGc(1)	Sialic acid
HexNAc(4)Hex(5)Fuc(3)	Fucose
HexNAc(4)Hex(5)Fuc(3)NeuAc(1)	Sialic acid
HexNAc(4)Hex(5)Fuc(3)NeuAc(2)	Sialic acid
HexNAc(4)Hex(5)Fuc(4)	Fucose
HexNAc(4)Hex(5)NeuAc(1)	Sialic acid
HexNAc(4)Hex(5)NeuAc(2)	Sialic acid
HexNAc(4)Hex(5)NeuGc(1)	Sialic acid
HexNAc(4)Hex(5)Phospho(2)	M-6-P
HexNAc(4)Hex(6)	Complex/Hybrid
HexNAc(4)Hex(6)Fuc(1)	Fucose
HexNAc(4)Hex(6)Fuc(1)NeuAc(1)	Sialic acid
HexNAc(4)Hex(6)Fuc(2)	Fucose
HexNAc(4)Hex(6)Fuc(3)	Fucose
HexNAc(4)Hex(6)NeuAc(1)	Sialic acid
HexNAc(4)Hex(6)NeuGc(1)	Sialic acid
HexNAc(4)Hex(6)Phospho(2)	M-6-P
HexNAc(4)Hex(7)	Complex/Hybrid
HexNAc(4)Hex(7)Fuc(1)	Fucose
HexNAc(4)Hex(7)Fuc(2)	Fucose
HexNAc(4)Hex(7)NeuAc(1)	Sialic acid
HexNAc(4)Hex(7)Phospho(2)	M-6-P
HexNAc(5)Hex(3)	Complex/Hybrid
HexNAc(5)Hex(3)Fuc(1)	Fucose
HexNAc(5)Hex(3)Fuc(1)NeuAc(1)	Sialic acid
HexNAc(5)Hex(3)Fuc(1)NeuGc(1)	Sialic acid
HexNAc(5)Hex(4)	Complex/Hybrid
HexNAc(5)Hex(4)Fuc(1)	Fucose
HexNAc(5)Hex(4)Fuc(1)NeuAc(1)	Sialic acid
HexNAc(5)Hex(4)Fuc(1)NeuAc(2)	Sialic acid
HexNAc(5)Hex(4)Fuc(1)NeuGc(2)	Sialic acid
HexNAc(5)Hex(4)Fuc(2)	Fucose
HexNAc(5)Hex(4)Fuc(2)NeuAc(1)	Sialic acid
HexNAc(5)Hex(4)NeuAc(1)	Sialic acid
HexNAc(5)Hex(4)NeuAc(1)NeuGc(1)	Sialic acid
HexNAc(5)Hex(4)NeuAc(2)	Sialic acid
HexNAc(5)Hex(4)NeuGc(1)	Sialic acid
HexNAc(5)Hex(4)NeuGc(2)	Sialic acid
HexNAc(5)Hex(5)	Complex/Hybrid
HexNAc(5)Hex(5)Fuc(1)	Fucose
HexNAc(5)Hex(5)Fuc(1)NeuAc(1)	Sialic acid
HexNAc(5)Hex(5)Fuc(1)NeuAc(2)	Sialic acid
HexNAc(5)Hex(5)Fuc(1)NeuGc(1)	Sialic acid
HexNAc(5)Hex(5)Fuc(2)	Fucose
HexNAc(5)Hex(5)Fuc(3)	Fucose
HexNAc(5)Hex(5)NeuAc(1)	Sialic acid
HexNAc(5)Hex(5)NeuAc(1)NeuGc(1)	Sialic acid
HexNAc(5)Hex(5)NeuAc(2)	Sialic acid
HexNAc(5)Hex(5)NeuGc(1)	Sialic acid
HexNAc(5)Hex(5)NeuGc(2)	Sialic acid
HexNAc(5)Hex(6)	Complex/Hybrid
HexNAc(5)Hex(6)Fuc(1)	Fucose
HexNAc(5)Hex(6)Fuc(1)NeuAc(1)	Sialic acid
HexNAc(5)Hex(6)Fuc(1)NeuAc(1)NeuGc(1)	Sialic acid
HexNAc(5)Hex(6)Fuc(1)NeuAc(2)	Sialic acid
HexNAc(5)Hex(6)Fuc(1)NeuAc(2)NeuGc(1)	Sialic acid
HexNAc(5)Hex(6)Fuc(1)NeuAc(3)	Sialic acid
HexNAc(5)Hex(6)Fuc(1)NeuGc(1)	Sialic acid
HexNAc(5)Hex(6)Fuc(1)NeuGc(2)	Sialic acid
HexNAc(5)Hex(6)Fuc(1)NeuGc(3)	Sialic acid
HexNAc(5)Hex(6)Fuc(2)	Fucose
HexNAc(5)Hex(6)Fuc(2)NeuAc(1)	Sialic acid
HexNAc(5)Hex(6)Fuc(3)	Fucose
HexNAc(5)Hex(6)Fuc(3)NeuAc(1)	Sialic acid
HexNAc(5)Hex(6)Fuc(3)NeuGc(1)	Sialic acid
HexNAc(5)Hex(6)NeuAc(1)	Sialic acid
HexNAc(5)Hex(6)NeuAc(2)	Sialic acid
HexNAc(5)Hex(6)NeuAc(3)	Sialic acid
HexNAc(5)Hex(6)NeuGc(2)	Sialic acid
HexNAc(5)Hex(7)	Complex/Hybrid
HexNAc(5)Hex(7)Fuc(1)	Fucose
HexNAc(5)Hex(7)Fuc(1)NeuAc(1)	Sialic acid
HexNAc(5)Hex(8)	Complex/Hybrid
HexNAc(5)Hex(8)Fuc(1)	Fucose
HexNAc(5)Hex(9)Fuc(1)	Fucose
HexNAc(6)Hex(11)Fuc(1)	Fucose
HexNAc(6)Hex(3)	Complex/Hybrid
HexNAc(6)Hex(3)Fuc(1)	Fucose
HexNAc(6)Hex(3)Fuc(1)NeuAc(1)	Sialic acid
HexNAc(6)Hex(3)Fuc(1)NeuAc(1)NeuGc(1)	Sialic acid
HexNAc(6)Hex(3)Fuc(1)NeuAc(2)	Sialic acid
HexNAc(6)Hex(3)Fuc(2)	Fucose
HexNAc(6)Hex(3)Fuc(2)NeuAc(1)	Sialic acid
HexNAc(6)Hex(3)Fuc(2)NeuGc(1)	Sialic acid
HexNAc(6)Hex(3)Fuc(3)	Fucose
HexNAc(6)Hex(4)	Complex/Hybrid
HexNAc(6)Hex(4)Fuc(1)	Fucose
HexNAc(6)Hex(4)Fuc(2)	Fucose
HexNAc(6)Hex(4)NeuAc(1)	Sialic acid
HexNAc(6)Hex(5)Fuc(1)	Fucose
HexNAc(6)Hex(5)Fuc(1)NeuAc(1)	Sialic acid
HexNAc(6)Hex(5)Fuc(1)NeuAc(1)NeuGc(2)	Sialic acid
HexNAc(6)Hex(5)Fuc(1)NeuAc(2)	Sialic acid
HexNAc(6)Hex(5)Fuc(1)NeuAc(2)NeuGc(1)	Sialic acid
HexNAc(6)Hex(5)Fuc(1)NeuGc(3)	Sialic acid
HexNAc(6)Hex(5)Fuc(2)	Fucose
HexNAc(6)Hex(6)	Complex/Hybrid
HexNAc(6)Hex(6)Fuc(1)	Fucose
HexNAc(6)Hex(6)Fuc(1)NeuAc(1)	Sialic acid
HexNAc(6)Hex(6)Fuc(1)NeuAc(1)NeuGc(2)	Sialic acid
HexNAc(6)Hex(6)Fuc(1)NeuAc(2)	Sialic acid
HexNAc(6)Hex(6)Fuc(1)NeuAc(3)	Sialic acid
HexNAc(6)Hex(6)Fuc(1)NeuGc(3)	Sialic acid
HexNAc(6)Hex(6)Fuc(2)	Fucose
HexNAc(6)Hex(6)Fuc(3)	Fucose
HexNAc(6)Hex(6)NeuAc(1)	Sialic acid
HexNAc(6)Hex(6)NeuAc(2)	Sialic acid
HexNAc(6)Hex(7)	Complex/Hybrid
HexNAc(6)Hex(7)Fuc(1)	Fucose
HexNAc(6)Hex(7)Fuc(1)NeuAc(1)	Sialic acid
HexNAc(6)Hex(7)Fuc(1)NeuAc(2)	Sialic acid
HexNAc(6)Hex(7)Fuc(1)NeuAc(3)	Sialic acid
HexNAc(6)Hex(7)Fuc(1)NeuAc(4)	Sialic acid
HexNAc(6)Hex(7)Fuc(4)	Fucose
HexNAc(6)Hex(7)Fuc(4)NeuAc(1)	Sialic acid
HexNAc(6)Hex(7)Fuc(4)NeuGc(1)	Sialic acid
HexNAc(6)Hex(7)Fuc(5)	Fucose
HexNAc(6)Hex(7)NeuAc(1)	Sialic acid
HexNAc(6)Hex(7)NeuAc(2)	Sialic acid
HexNAc(6)Hex(7)NeuAc(2)NeuGc(1)	Sialic acid
HexNAc(6)Hex(7)NeuAc(3)	Sialic acid
HexNAc(6)Hex(7)NeuAc(4)	Sialic acid
HexNAc(6)Hex(7)NeuGc(1)	Sialic acid
HexNAc(6)Hex(7)NeuGc(2)	Sialic acid
HexNAc(6)Hex(8)Fuc(1)NeuAc(1)	Sialic acid
HexNAc(6)Hex(8)NeuAc(1)	Sialic acid
HexNAc(6)Hex(9)	Complex/Hybrid
HexNAc(6)Hex(9)Fuc(1)NeuAc(2)	Sialic acid
HexNAc(7)Hex(3)	Complex/Hybrid
HexNAc(7)Hex(3)Fuc(1)	Fucose
HexNAc(7)Hex(4)	Complex/Hybrid
HexNAc(7)Hex(4)Fuc(1)	Fucose
HexNAc(7)Hex(4)Fuc(2)	Fucose
HexNAc(7)Hex(6)	Complex/Hybrid
HexNAc(7)Hex(6)Fuc(1)	Fucose
HexNAc(7)Hex(6)Fuc(1)NeuAc(4)	Sialic acid
HexNAc(7)Hex(7)	Complex/Hybrid
HexNAc(7)Hex(7)Fuc(1)	Fucose
HexNAc(7)Hex(7)Fuc(1)NeuAc(2)	Sialic acid
HexNAc(7)Hex(7)Fuc(1)NeuAc(2)NeuGc(1)	Sialic acid
HexNAc(7)Hex(7)Fuc(1)NeuAc(4)	Sialic acid
HexNAc(7)Hex(8)	Complex/Hybrid
HexNAc(7)Hex(8)Fuc(1)	Fucose
HexNAc(7)Hex(8)Fuc(1)NeuAc(1)	Sialic acid
HexNAc(7)Hex(8)Fuc(1)NeuAc(2)	Sialic acid
HexNAc(7)Hex(8)Fuc(1)NeuAc(3)	Sialic acid
HexNAc(7)Hex(8)Fuc(1)NeuGc(2)	Sialic acid
HexNAc(7)Hex(8)NeuAc(1)	Sialic acid
HexNAc(8)Hex(3)	Complex/Hybrid
HexNAc(8)Hex(3)Fuc(1)	Fucose
HexNAc(8)Hex(4)	Complex/Hybrid
HexNAc(8)Hex(5)Fuc(1)	Fucose
HexNAc(8)Hex(6)	Complex/Hybrid
HexNAc(8)Hex(7)	Complex/Hybrid
HexNAc(8)Hex(8)	Complex/Hybrid
HexNAc(8)Hex(8)Fuc(1)	Fucose
HexNAc(8)Hex(9)	Complex/Hybrid
HexNAc(8)Hex(9)Fuc(1)	Fucose
HexNAc(8)Hex(9)Fuc(1)NeuAc(3)	Sialic acid
HexNAc(9)Hex(10)	Complex/Hybrid
HexNAc(9)Hex(10)Fuc(1)	Fucose
HexNAc(9)Hex(10)Fuc(1)NeuAc(4)	Sialic acid
HexNAc(9)Hex(3)	Complex/Hybrid
HexNAc(9)Hex(3)Fuc(1)	Fucose
HexNAc(9)Hex(4)	Complex/Hybrid
HexNAc(9)Hex(6)	Complex/Hybrid
HexNAc(9)Hex(9)Fuc(1)	Fucose

## Sheet: Glycosites
Protein_Glycosite_Glycan
A2A2Y4_N359_HexNAc(2)Hex(4)
A6NHM9_N404_HexNAc(2)Hex(7)
A6NMZ7_N198_HexNAc(4)Hex(5)Fuc(1)NeuAc(1)
A6NMZ7_N2034_HexNAc(4)Hex(5)NeuAc(1)
A6NMZ7_N275_HexNAc(5)Hex(6)Fuc(1)NeuAc(2)
A6NMZ7_N347_HexNAc(4)Hex(5)Fuc(1)
A6NMZ7_N400_HexNAc(4)Hex(5)NeuAc(2)
A6NMZ7_N576_HexNAc(4)Hex(5)Fuc(1)NeuAc(2)
A6NMZ7_N988_HexNAc(2)Hex(8)
A6NMZ7_N988_HexNAc(2)Hex(9)
O00468_N135_HexNAc(1)
O00468_N135_HexNAc(2)Hex(5)
O00468_N135_HexNAc(4)Hex(5)Fuc(1)NeuAc(1)
O00468_N135_HexNAc(4)Hex(5)Fuc(2)
O00468_N135_HexNAc(4)Hex(5)NeuAc(1)
O00468_N135_HexNAc(4)Hex(5)NeuAc(2)
O00468_N135_HexNAc(9)Hex(4)
O00468_N250_HexNAc(3)Hex(6)Fuc(1)NeuGc(1)
O00468_N250_HexNAc(4)Hex(5)Fuc(2)
O00468_N250_HexNAc(4)Hex(5)Fuc(2)NeuAc(1)
O00468_N250_HexNAc(4)Hex(5)Fuc(3)
O00468_N250_HexNAc(4)Hex(5)Fuc(3)NeuAc(1)
O00468_N250_HexNAc(4)Hex(5)NeuAc(1)
O00468_N250_HexNAc(5)Hex(5)Fuc(2)
O00468_N250_HexNAc(6)Hex(7)
O00468_N777_HexNAc(4)Hex(5)Fuc(1)
O00468_N777_HexNAc(4)Hex(5)Fuc(1)NeuAc(1)
O00468_N777_HexNAc(4)Hex(5)Fuc(3)
O00468_N777_HexNAc(4)Hex(5)NeuAc(1)
O00468_N777_HexNAc(4)Hex(5)NeuAc(1)
O00468_N777_HexNAc(5)Hex(6)Fuc(1)NeuAc(3)
O00468_N777_HexNAc(5)Hex(6)Fuc(1)NeuAc(3)
O00468_N777_HexNAc(7)Hex(8)Fuc(1)NeuAc(1)
O00468_N777_HexNAc(7)Hex(8)NeuAc(1)
O00468_N932_HexNAc(4)Hex(5)Fuc(1)NeuAc(1)
O00468_N932_HexNAc(4)Hex(5)Fuc(1)NeuAc(1)
O00468_N932_HexNAc(4)Hex(5)Fuc(2)NeuAc(1)
O00468_N932_HexNAc(4)Hex(5)Fuc(2)NeuAc(1)
O14656_N158_HexNAc(2)Hex(9)
O14672_N267_HexNAc(2)Hex(5)
O14672_N278_HexNAc(2)Hex(8)
O14672_N278_HexNAc(2)Hex(8)
O14672_N278_HexNAc(2)Hex(9)
O14672_N278_HexNAc(2)Hex(9)
O14672_N278_HexNAc(7)Hex(4)
O14672_N439_HexNAc(2)Hex(6)
O14672_N439_HexNAc(2)Hex(7)
O14773_N210_HexNAc(6)Hex(5)Fuc(1)NeuAc(2)
O14773_N210_HexNAc(6)Hex(6)Fuc(1)NeuAc(2)
O14773_N210_HexNAc(6)Hex(6)Fuc(1)NeuAc(2)
O14773_N210_HexNAc(6)Hex(7)Fuc(1)NeuAc(2)
O14773_N210_HexNAc(6)Hex(7)Fuc(1)NeuAc(2)
O14773_N222_HexNAc(6)Hex(6)Fuc(1)NeuAc(2)
O14773_N443_HexNAc(2)Hex(2)Fuc(1)
O14773_N443_HexNAc(2)Hex(3)
O15027_N982_HexNAc(2)Hex(7)
O15031_N1002_HexNAc(2)Hex(8)
O15031_N1002_HexNAc(2)Hex(9)
O15031_N1002_HexNAc(4)Hex(5)NeuGc(1)
O15031_N1099_HexNAc(4)Hex(5)Fuc(1)
O15031_N528_HexNAc(4)Hex(5)
O15031_N528_HexNAc(4)Hex(5)NeuAc(1)
O15031_N528_HexNAc(4)Hex(5)NeuAc(2)
O15031_N733_HexNAc(4)Hex(5)Fuc(2)NeuAc(1)
O15031_N759_HexNAc(3)Hex(6)NeuAc(1)
O15118_N222_HexNAc(2)Hex(8)
O15230_N1330_HexNAc(2)Hex(5)
O15230_N1330_HexNAc(2)Hex(8)
O15230_N1330_HexNAc(2)Hex(9)
O15230_N1529_HexNAc(2)Hex(5)
O15230_N1529_HexNAc(4)Hex(5)NeuAc(2)
O15230_N1555_HexNAc(4)Hex(5)Fuc(1)NeuAc(1)
O15230_N1555_HexNAc(4)Hex(5)NeuAc(1)
O15230_N2019_HexNAc(4)Hex(5)Fuc(1)NeuAc(1)
O15230_N2019_HexNAc(4)Hex(5)Fuc(2)NeuAc(1)
O15230_N2019_HexNAc(4)Hex(5)Fuc(3)
O15230_N2019_HexNAc(4)Hex(5)Fuc(4)
O15230_N2019_HexNAc(5)Hex(5)Fuc(1)
O15230_N2019_HexNAc(5)Hex(5)Fuc(2)
O15230_N2196_HexNAc(4)Hex(5)Fuc(1)NeuAc(1)
O15230_N2196_HexNAc(4)Hex(5)Fuc(2)NeuAc(1)
O15230_N2196_HexNAc(5)Hex(6)Fuc(1)NeuAc(2)
O15230_N2209_HexNAc(1)Fuc(1)
O15230_N2209_HexNAc(4)Hex(5)Fuc(1)
O15230_N2209_HexNAc(4)Hex(5)Fuc(1)NeuAc(1)
O15230_N2209_HexNAc(4)Hex(5)Fuc(1)NeuAc(2)
O15230_N2209_HexNAc(4)Hex(5)Fuc(2)NeuAc(1)
O15230_N2209_HexNAc(4)Hex(5)Fuc(3)
O15230_N2209_HexNAc(4)Hex(5)NeuAc(2)
O15230_N2209_HexNAc(5)Hex(4)Fuc(1)
O15230_N2209_HexNAc(5)Hex(5)Fuc(1)
O15230_N2209_HexNAc(5)Hex(6)Fuc(1)NeuAc(1)
O15230_N2303_HexNAc(4)Hex(5)Fuc(1)NeuAc(2)
O15230_N2303_HexNAc(4)Hex(5)Fuc(3)NeuAc(2)
O15230_N2303_HexNAc(5)Hex(6)Fuc(1)NeuAc(1)
O15230_N2303_HexNAc(5)Hex(6)Fuc(1)NeuAc(2)
O15230_N2303_HexNAc(5)Hex(6)Fuc(1)NeuAc(3)
O15230_N2303_HexNAc(5)Hex(6)NeuAc(2)
O15230_N2303_HexNAc(6)Hex(7)Fuc(1)NeuAc(1)
O15230_N2303_HexNAc(6)Hex(7)Fuc(1)NeuAc(2)
O15230_N2303_HexNAc(6)Hex(7)Fuc(4)NeuAc(1)
O15230_N2303_HexNAc(6)Hex(7)Fuc(4)NeuAc(1)
O15230_N2423_HexNAc(4)Hex(4)NeuGc(1)
O15230_N2423_HexNAc(4)Hex(5)
O15230_N2423_HexNAc(4)Hex(5)Fuc(1)
O15230_N2423_HexNAc(4)Hex(5)Fuc(1)
O15230_N2423_HexNAc(4)Hex(5)Fuc(1)NeuAc(1)
O15230_N2423_HexNAc(4)Hex(5)NeuAc(1)
O15230_N2568_HexNAc(4)Hex(5)Fuc(1)NeuAc(1)
O15230_N2568_HexNAc(4)Hex(5)Fuc(1)NeuAc(1)
O15230_N2568_HexNAc(4)Hex(5)Fuc(1)NeuAc(2)
O15230_N2568_HexNAc(4)Hex(5)Fuc(1)NeuAc(2)
O15230_N2568_HexNAc(4)Hex(5)Fuc(2)NeuAc(1)
O15230_N2568_HexNAc(4)Hex(5)Fuc(2)NeuAc(1)
O15230_N2568_HexNAc(4)Hex(5)Fuc(4)
O15230_N2568_HexNAc(5)Hex(6)Fuc(1)NeuAc(3)
O15230_N2707_HexNAc(3)Hex(6)NeuGc(1)
O15230_N2707_HexNAc(4)Hex(5)Fuc(1)
O15230_N2707_HexNAc(4)Hex(5)Fuc(1)NeuAc(1)
O15230_N2707_HexNAc(4)Hex(5)Fuc(2)NeuAc(1)
O15230_N2707_HexNAc(4)Hex(5)Fuc(3)
O15230_N2707_HexNAc(4)Hex(5)Fuc(4)
O15230_N2707_HexNAc(4)Hex(5)NeuAc(2)
O15230_N3107_HexNAc(2)Hex(5)
O15230_N3107_HexNAc(2)Hex(5)
O15230_N3107_HexNAc(4)Hex(5)Fuc(1)NeuAc(1)
O15230_N3107_HexNAc(4)Hex(5)NeuAc(1)
O15230_N3257_HexNAc(2)Hex(5)
O15230_N3287_HexNAc(1)
O15230_N3287_HexNAc(2)Hex(5)
O15230_N3287_HexNAc(2)Hex(5)
O15230_N3287_HexNAc(2)Hex(6)
O15230_N3287_HexNAc(2)Hex(7)
O15230_N3287_HexNAc(4)Hex(5)
O15230_N3287_HexNAc(5)Hex(6)Fuc(3)NeuAc(1)
O15230_N3287_HexNAc(6)Hex(5)Fuc(2)
O15230_N3287_HexNAc(7)Hex(4)Fuc(2)
O15230_N95_HexNAc(1)
O15230_N95_HexNAc(2)Hex(5)
O15230_N95_HexNAc(2)Hex(5)
O15230_N95_HexNAc(2)Hex(6)
O15230_N95_HexNAc(2)Hex(9)
O15230_N95_HexNAc(8)Hex(6)
O15230_N959_HexNAc(1)
O15230_N959_HexNAc(2)Hex(1)Fuc(1)
O15230_N959_HexNAc(2)Hex(3)Fuc(2)
O15230_N959_HexNAc(2)Hex(5)
O15455_N247_HexNAc(4)Hex(5)Fuc(1)NeuAc(1)
O43399_N92_HexNAc(5)Hex(3)Fuc(1)NeuAc(1)
O43493_N180_HexNAc(2)Hex(1)Fuc(1)
O43795_N369_HexNAc(5)Hex(4)
O60256_N14_HexNAc(5)Hex(5)Fuc(1)NeuAc(2)
O60256_N14_HexNAc(7)Hex(8)Fuc(1)NeuAc(1)
O60313_N780_HexNAc(3)Hex(6)
O60313_N780_HexNAc(4)Hex(6)
O60568_N548_HexNAc(2)Hex(6)
O60568_N548_HexNAc(2)Hex(8)
O60568_N548_HexNAc(2)Hex(9)
O60716_N434_HexNAc(2)Hex(6)
O60716_N434_HexNAc(2)Hex(7)
O60716_N434_HexNAc(2)Hex(8)
O60716_N434_HexNAc(2)Hex(9)
O60716_N609_HexNAc(9)Hex(10)Fuc(1)NeuAc(4)
O75051_N163_HexNAc(2)Hex(5)
O75051_N655_HexNAc(4)Hex(6)NeuAc(1)
O75131_N291_HexNAc(2)Hex(5)
O75131_N291_HexNAc(3)Hex(4)Fuc(1)
O75131_N291_HexNAc(4)Hex(5)Fuc(1)
O75175_N413_HexNAc(5)Hex(7)Fuc(1)
O75175_N413_HexNAc(6)Hex(11)Fuc(1)
O75208_N310_HexNAc(11)Hex(11)NeuAc(1)
O75355_N81_HexNAc(2)Hex(7)
O75355_N81_HexNAc(6)Hex(3)
O75369_N1398_HexNAc(2)Hex(2)Fuc(1)
O75494_N9_HexNAc(5)Hex(6)NeuAc(3)
O75503_N178_HexNAc(2)Hex(7)Phospho(1)
O75533_N626_HexNAc(6)Hex(8)NeuAc(1)
O75718_N363_HexNAc(2)Hex(8)
O75976_N172_HexNAc(4)Hex(5)Fuc(2)NeuAc(1)
O75976_N855_HexNAc(4)Hex(5)Fuc(1)NeuAc(1)
O75976_N955_HexNAc(2)Hex(5)
O75976_N955_HexNAc(2)Hex(5)
O75976_N955_HexNAc(2)Hex(6)
O75976_N955_HexNAc(2)Hex(6)
O75976_N978_HexNAc(5)Hex(6)Fuc(2)NeuAc(1)
O75976_N978_HexNAc(7)Hex(8)Fuc(1)
O76024_N661_HexNAc(2)Hex(8)
O76024_N746_HexNAc(2)Hex(5)
O76024_N746_HexNAc(2)Hex(6)
O94832_N903_HexNAc(6)Hex(4)Fuc(2)
O94832_N903_HexNAc(6)Hex(4)NeuAc(1)
O94901_N588_HexNAc(2)Hex(1)
O94901_N588_HexNAc(2)Hex(2)
O94901_N588_HexNAc(2)Hex(3)
O94901_N588_HexNAc(2)Hex(4)
O94901_N588_HexNAc(2)Hex(5)
O94901_N588_HexNAc(2)Hex(6)
O94901_N588_HexNAc(2)Hex(7)
O94901_N588_HexNAc(2)Hex(8)
O94901_N588_HexNAc(2)Hex(9)
O94905_N106_HexNAc(2)Hex(4)
O94905_N106_HexNAc(2)Hex(5)
O94905_N106_HexNAc(2)Hex(6)
O94905_N106_HexNAc(2)Hex(7)
O94905_N106_HexNAc(2)Hex(8)
O94905_N106_HexNAc(2)Hex(9)
O95139_N53_HexNAc(4)Hex(5)Fuc(1)NeuAc(1)
O95168_N24_HexNAc(6)Hex(5)Fuc(1)NeuAc(2)NeuGc(1)
O95219_N208_HexNAc(2)Hex(9)
O95302_N174_HexNAc(2)Hex(7)
O95302_N174_HexNAc(2)Hex(8)
O95302_N174_HexNAc(6)Hex(6)Fuc(2)
O95302_N286_HexNAc(2)Hex(8)
O95302_N286_HexNAc(2)Hex(9)
O95302_N397_HexNAc(2)Hex(6)
O95716_N188_HexNAc(2)Hex(7)Phospho(1)
O96005_N241_HexNAc(2)Hex(9)
O96005_N295_HexNAc(2)Hex(8)
P00450_N397_HexNAc(4)Hex(5)NeuAc(2)
P00450_N762_HexNAc(5)Hex(6)NeuAc(3)
P00488_N557_HexNAc(4)Hex(5)Fuc(2)
P00533_N352_HexNAc(2)Hex(6)
P00533_N361_HexNAc(2)Hex(7)
P00533_N361_HexNAc(2)Hex(8)
P00533_N623_HexNAc(2)Hex(7)
P00738_N184_HexNAc(4)Hex(5)Fuc(4)
P00738_N184_HexNAc(4)Hex(5)Fuc(4)
P00738_N184_HexNAc(4)Hex(5)NeuAc(1)
P00738_N184_HexNAc(4)Hex(5)NeuAc(1)
P00738_N184_HexNAc(4)Hex(5)NeuAc(2)
P00738_N184_HexNAc(4)Hex(5)NeuAc(2)
P00738_N184_HexNAc(5)Hex(4)Fuc(2)NeuAc(1)
P00738_N184_HexNAc(5)Hex(4)NeuAc(2)
P00738_N184_HexNAc(5)Hex(6)NeuAc(3)
P00738_N207_HexNAc(4)Hex(5)NeuAc(2)
P00738_N241_HexNAc(4)Hex(5)Fuc(1)NeuAc(2)
P00738_N241_HexNAc(4)Hex(5)Fuc(2)
P00738_N241_HexNAc(4)Hex(5)Fuc(2)NeuAc(1)
P00738_N241_HexNAc(4)Hex(5)NeuAc(1)
P00738_N241_HexNAc(4)Hex(5)NeuAc(2)
P00738_N241_HexNAc(5)Hex(6)Fuc(1)NeuAc(3)
P00738_N241_HexNAc(5)Hex(6)Fuc(2)NeuAc(1)
P00738_N241_HexNAc(5)Hex(6)NeuAc(2)
P00738_N241_HexNAc(5)Hex(6)NeuAc(3)
P01008_N128_HexNAc(4)Hex(5)NeuAc(2)
P01008_N224_HexNAc(4)Hex(5)NeuAc(2)
P01009_N271_HexNAc(2)Hex(12)
P01009_N271_HexNAc(3)Hex(4)Fuc(2)
P01009_N271_HexNAc(4)Hex(5)Fuc(1)NeuAc(1)NeuGc(1)
P01009_N271_HexNAc(4)Hex(5)Fuc(2)NeuAc(1)
P01009_N271_HexNAc(4)Hex(5)Fuc(4)
P01009_N271_HexNAc(4)Hex(5)NeuAc(1)
P01009_N271_HexNAc(4)Hex(5)NeuAc(2)
P01009_N271_HexNAc(4)Hex(6)Fuc(1)NeuAc(1)
P01011_N106_HexNAc(2)Hex(6)
P01011_N106_HexNAc(2)Hex(7)
P01011_N106_HexNAc(2)Hex(8)
P01011_N106_HexNAc(2)Hex(9)
P01011_N106_HexNAc(4)Hex(5)Fuc(2)
P01011_N106_HexNAc(4)Hex(5)NeuAc(2)
P01011_N106_HexNAc(5)Hex(6)Fuc(1)NeuAc(1)
P01011_N106_HexNAc(5)Hex(6)Fuc(1)NeuAc(3)
P01011_N106_HexNAc(5)Hex(6)Fuc(2)NeuAc(1)
P01011_N106_HexNAc(5)Hex(6)NeuAc(3)
P01011_N106_HexNAc(6)Hex(7)Fuc(1)NeuAc(1)
P01011_N106_HexNAc(6)Hex(7)Fuc(4)
P01011_N106_HexNAc(6)Hex(7)Fuc(5)
P01011_N127_HexNAc(2)Hex(3)
P01011_N127_HexNAc(2)Hex(8)
P01011_N127_HexNAc(2)Hex(9)
P01011_N127_HexNAc(4)Hex(5)Fuc(2)NeuAc(1)
P01011_N127_HexNAc(4)Hex(5)Fuc(3)NeuAc(2)
P01011_N127_HexNAc(4)Hex(5)NeuAc(1)
P01011_N127_HexNAc(4)Hex(5)NeuAc(2)
P01011_N127_HexNAc(4)Hex(5)NeuAc(2)
P01011_N127_HexNAc(5)Hex(6)NeuAc(1)
P01011_N127_HexNAc(5)Hex(6)NeuAc(2)
P01011_N127_HexNAc(5)Hex(6)NeuAc(3)
P01011_N127_HexNAc(6)Hex(6)Fuc(1)NeuAc(1)
P01011_N127_HexNAc(6)Hex(6)Fuc(2)
P01011_N127_HexNAc(6)Hex(6)NeuAc(1)
P01011_N127_HexNAc(6)Hex(6)NeuAc(1)
P01011_N127_HexNAc(6)Hex(7)Fuc(1)
P01011_N127_HexNAc(6)Hex(7)Fuc(1)NeuAc(1)
P01011_N127_HexNAc(6)Hex(7)Fuc(1)NeuAc(1)
P01011_N127_HexNAc(6)Hex(7)Fuc(1)NeuAc(2)
P01011_N127_HexNAc(6)Hex(7)Fuc(4)
P01011_N127_HexNAc(6)Hex(7)Fuc(4)
P01011_N127_HexNAc(6)Hex(7)Fuc(4)NeuAc(1)
P01011_N127_HexNAc(6)Hex(7)NeuAc(1)
P01011_N127_HexNAc(6)Hex(7)NeuAc(1)
P01011_N127_HexNAc(6)Hex(7)NeuAc(2)
P01011_N127_HexNAc(7)Hex(6)Fuc(1)
P01011_N127_HexNAc(7)Hex(8)Fuc(1)NeuAc(1)
P01011_N127_HexNAc(8)Hex(9)Fuc(1)
P01011_N271_HexNAc(1)
P01011_N271_HexNAc(1)Fuc(1)
P01011_N271_HexNAc(2)Hex(5)
P01011_N271_HexNAc(2)Hex(6)
P01011_N271_HexNAc(2)Hex(7)
P01011_N271_HexNAc(2)Hex(8)
P01011_N271_HexNAc(2)Hex(9)
P01011_N271_HexNAc(3)Hex(4)Fuc(1)
P01011_N271_HexNAc(3)Hex(4)Fuc(1)NeuAc(1)
P01011_N271_HexNAc(3)Hex(4)Fuc(2)
P01011_N271_HexNAc(3)Hex(7)Phospho(2)
P01011_N271_HexNAc(4)Hex(3)Fuc(1)
P01011_N271_HexNAc(4)Hex(5)Fuc(2)
P01011_N271_HexNAc(4)Hex(5)Fuc(2)NeuAc(1)
P01011_N271_HexNAc(4)Hex(5)Fuc(3)
P01011_N271_HexNAc(4)Hex(5)Fuc(4)
P01011_N271_HexNAc(4)Hex(5)NeuAc(1)
P01011_N271_HexNAc(4)Hex(5)NeuAc(2)
P01011_N271_HexNAc(5)Hex(5)Fuc(2)
P01011_N271_HexNAc(5)Hex(6)Fuc(1)NeuAc(2)
P01011_N271_HexNAc(5)Hex(6)Fuc(1)NeuAc(3)
P01011_N271_HexNAc(5)Hex(6)NeuAc(1)
P01011_N271_HexNAc(5)Hex(6)NeuAc(2)
P01011_N271_HexNAc(5)Hex(6)NeuAc(3)
P01011_N271_HexNAc(6)Hex(7)Fuc(1)NeuAc(4)
P01011_N271_HexNAc(6)Hex(7)Fuc(4)
P01011_N271_HexNAc(6)Hex(7)Fuc(4)NeuAc(1)
P01011_N271_HexNAc(6)Hex(7)NeuAc(2)
P01011_N271_HexNAc(6)Hex(7)NeuAc(3)
P01011_N271_HexNAc(6)Hex(7)NeuAc(4)
P01011_N271_HexNAc(7)Hex(8)Fuc(1)NeuAc(1)
P01011_N271_HexNAc(7)Hex(8)Fuc(1)NeuAc(2)
P01011_N271_HexNAc(9)Hex(10)
P01011_N271_HexNAc(9)Hex(10)Fuc(1)
P01011_N93_HexNAc(1)
P01011_N93_HexNAc(1)Fuc(1)
P01024_N85_HexNAc(2)Hex(5)
P01024_N85_HexNAc(2)Hex(5)
P01024_N85_HexNAc(2)Hex(6)
P01024_N85_HexNAc(2)Hex(6)
P01024_N85_HexNAc(2)Hex(6)
P01024_N85_HexNAc(2)Hex(6)
P01024_N85_HexNAc(2)Hex(7)
P01024_N85_HexNAc(2)Hex(7)
P01024_N85_HexNAc(2)Hex(8)
P01024_N85_HexNAc(2)Hex(8)
P01024_N85_HexNAc(2)Hex(9)
P01024_N85_HexNAc(2)Hex(9)
P01031_N1630_HexNAc(4)Hex(5)Fuc(2)NeuAc(1)
P01031_N741_HexNAc(4)Hex(5)NeuAc(2)
P01833_N469_HexNAc(4)Hex(5)Fuc(2)NeuAc(1)
P01833_N499_HexNAc(2)Hex(5)
P01833_N499_HexNAc(4)Hex(5)NeuAc(1)
P01859_N176_HexNAc(3)Hex(3)Fuc(1)
P01859_N176_HexNAc(4)Hex(3)Fuc(1)
P01859_N176_HexNAc(4)Hex(3)Fuc(1)
P01859_N176_HexNAc(4)Hex(4)Fuc(1)
P01859_N176_HexNAc(4)Hex(5)Fuc(1)
P01859_N176_HexNAc(8)Hex(9)Fuc(1)
P01861_N177_HexNAc(3)Hex(3)
P01861_N177_HexNAc(3)Hex(3)Fuc(1)
P01861_N177_HexNAc(4)Hex(3)Fuc(1)
P01861_N177_HexNAc(4)Hex(3)Fuc(1)
P01861_N177_HexNAc(4)Hex(4)Fuc(1)
P01861_N177_HexNAc(4)Hex(4)Fuc(1)
P01861_N177_HexNAc(4)Hex(5)Fuc(1)
P01871_N209_HexNAc(4)Hex(5)Fuc(1)NeuAc(1)
P01871_N209_HexNAc(4)Hex(5)Fuc(1)NeuAc(1)
P01871_N209_HexNAc(4)Hex(5)Fuc(1)NeuAc(2)
P01871_N209_HexNAc(4)Hex(5)Fuc(3)NeuAc(1)
P01871_N209_HexNAc(5)Hex(4)Fuc(1)NeuAc(1)
P01871_N209_HexNAc(5)Hex(4)Fuc(1)NeuAc(1)
P01871_N209_HexNAc(5)Hex(5)Fuc(1)NeuAc(1)
P01871_N209_HexNAc(5)Hex(5)Fuc(1)NeuAc(1)
P01871_N440_HexNAc(2)Hex(6)
P01871_N46_HexNAc(3)Hex(4)Fuc(1)NeuAc(1)
P01871_N46_HexNAc(3)Hex(4)Fuc(1)NeuAc(1)
P01871_N46_HexNAc(4)Hex(5)Fuc(1)NeuAc(1)
P01871_N46_HexNAc(4)Hex(5)Fuc(1)NeuAc(1)
P01871_N46_HexNAc(5)Hex(5)Fuc(1)NeuAc(1)
P01871_N46_HexNAc(5)Hex(5)Fuc(1)NeuAc(1)
P01871_N46_HexNAc(5)Hex(5)NeuAc(1)
P01877_N205_HexNAc(2)Hex(8)
P01877_N205_HexNAc(5)Hex(3)Fuc(1)
P01889_N110_HexNAc(2)Hex(8)
P01889_N110_HexNAc(4)Hex(5)Fuc(2)NeuAc(1)
P01889_N110_HexNAc(5)Hex(5)Fuc(1)NeuAc(2)
P01889_N110_HexNAc(5)Hex(5)NeuAc(2)
P01903_N103_HexNAc(5)Hex(6)Fuc(1)NeuAc(2)
P01903_N103_HexNAc(6)Hex(5)Fuc(1)NeuAc(1)NeuGc(2)
P01903_N103_HexNAc(6)Hex(7)Fuc(1)NeuAc(2)
P01903_N103_HexNAc(7)Hex(8)NeuAc(1)
P01903_N103_HexNAc(8)Hex(5)Fuc(1)
P01903_N143_HexNAc(2)Hex(5)
P01903_N143_HexNAc(2)Hex(6)
P01903_N143_HexNAc(2)Hex(8)
P02452_N1365_HexNAc(2)Hex(6)
P02452_N1365_HexNAc(2)Hex(6)
P02452_N1365_HexNAc(2)Hex(7)
P02452_N1365_HexNAc(2)Hex(7)
P02461_N1367_HexNAc(2)Hex(6)
P02461_N1367_HexNAc(2)Hex(7)
P02461_N1367_HexNAc(2)Hex(8)
P02461_N389_HexNAc(2)Hex(1)Fuc(1)
P02675_N394_HexNAc(3)Hex(4)
P02675_N394_HexNAc(3)Hex(5)NeuAc(1)
P02675_N394_HexNAc(4)Hex(3)NeuAc(1)
P02675_N394_HexNAc(4)Hex(4)NeuAc(1)
P02675_N394_HexNAc(4)Hex(5)
P02675_N394_HexNAc(4)Hex(5)Fuc(1)NeuAc(1)
P02675_N394_HexNAc(4)Hex(5)Fuc(2)
P02675_N394_HexNAc(4)Hex(5)Fuc(2)
P02675_N394_HexNAc(4)Hex(5)NeuAc(1)
P02675_N394_HexNAc(4)Hex(5)NeuAc(1)
P02675_N394_HexNAc(4)Hex(5)NeuAc(1)
P02675_N394_HexNAc(4)Hex(5)NeuAc(1)
P02675_N394_HexNAc(4)Hex(5)NeuAc(1)
P02675_N394_HexNAc(4)Hex(5)NeuAc(2)
P02675_N394_HexNAc(4)Hex(5)NeuAc(2)
P02675_N394_HexNAc(4)Hex(5)NeuAc(2)
P02675_N394_HexNAc(4)Hex(5)NeuAc(2)
P02675_N394_HexNAc(4)Hex(6)Fuc(1)
P02679_N78_HexNAc(3)Hex(4)
P02679_N78_HexNAc(3)Hex(4)
P02679_N78_HexNAc(3)Hex(4)NeuAc(1)
P02679_N78_HexNAc(4)Hex(4)Fuc(2)
P02679_N78_HexNAc(4)Hex(4)Fuc(2)
P02679_N78_HexNAc(4)Hex(4)NeuAc(1)
P02679_N78_HexNAc(4)Hex(4)NeuAc(1)
P02679_N78_HexNAc(4)Hex(5)
P02679_N78_HexNAc(4)Hex(5)Fuc(1)NeuAc(1)
P02679_N78_HexNAc(4)Hex(5)Fuc(1)NeuAc(1)
P02679_N78_HexNAc(4)Hex(5)Fuc(3)
P02679_N78_HexNAc(4)Hex(5)NeuAc(1)
P02679_N78_HexNAc(4)Hex(5)NeuAc(1)
P02679_N78_HexNAc(4)Hex(5)NeuAc(2)
P02679_N78_HexNAc(4)Hex(5)NeuAc(2)
P02679_N78_HexNAc(4)Hex(6)NeuAc(1)
P02743_N51_HexNAc(4)Hex(5)NeuAc(1)
P02743_N51_HexNAc(4)Hex(5)NeuAc(2)
P02743_N51_HexNAc(7)Hex(7)Fuc(1)NeuAc(4)
P02745_N146_HexNAc(4)Hex(5)Fuc(1)NeuAc(1)
P02745_N146_HexNAc(4)Hex(5)Fuc(1)NeuAc(1)
P02745_N146_HexNAc(4)Hex(5)NeuAc(2)
P02748_N277_HexNAc(4)Hex(5)NeuAc(1)
P02748_N277_HexNAc(4)Hex(5)NeuAc(2)
P02749_N162_HexNAc(1)
P02749_N162_HexNAc(2)
P02749_N162_HexNAc(2)Hex(1)Fuc(1)
P02749_N162_HexNAc(3)Hex(7)Phospho(1)
P02749_N162_HexNAc(4)Hex(4)Fuc(1)NeuAc(1)
P02749_N162_HexNAc(4)Hex(5)Fuc(1)NeuAc(2)
P02749_N162_HexNAc(4)Hex(5)NeuAc(1)
P02749_N162_HexNAc(4)Hex(5)NeuAc(2)
P02749_N162_HexNAc(4)Hex(5)NeuAc(2)
P02749_N253_HexNAc(4)Hex(5)NeuAc(1)
P02749_N253_HexNAc(4)Hex(5)NeuAc(2)
P02749_N253_HexNAc(5)Hex(4)NeuAc(2)
P02749_N253_HexNAc(6)Hex(7)Fuc(1)NeuAc(3)
P02750_N186_HexNAc(4)Hex(5)NeuAc(2)
P02751_N1007_HexNAc(4)Hex(4)Fuc(1)
P02751_N1007_HexNAc(4)Hex(5)Fuc(1)
P02751_N1007_HexNAc(4)Hex(5)Fuc(1)NeuAc(1)
P02751_N1007_HexNAc(4)Hex(5)Fuc(1)NeuAc(2)
P02751_N1007_HexNAc(4)Hex(5)NeuAc(1)
P02751_N1007_HexNAc(4)Hex(5)NeuAc(2)
P02751_N1007_HexNAc(5)Hex(4)Fuc(1)
P02751_N1007_HexNAc(5)Hex(4)Fuc(1)
P02751_N1007_HexNAc(5)Hex(5)Fuc(1)
P02751_N430_HexNAc(4)Hex(5)Fuc(1)
P02751_N430_HexNAc(4)Hex(5)Fuc(1)
P02751_N430_HexNAc(4)Hex(5)Fuc(1)NeuAc(1)
P02751_N430_HexNAc(4)Hex(5)NeuAc(1)
P02751_N528_HexNAc(4)Hex(4)Fuc(1)
P02751_N528_HexNAc(4)Hex(4)Fuc(1)NeuAc(1)
P02751_N528_HexNAc(4)Hex(5)Fuc(1)
P02751_N528_HexNAc(4)Hex(5)Fuc(1)NeuAc(1)
P02751_N528_HexNAc(4)Hex(5)Fuc(2)
P02751_N528_HexNAc(4)Hex(5)NeuAc(1)
P02751_N528_HexNAc(4)Hex(5)NeuAc(2)
P02751_N542_HexNAc(4)Hex(5)Fuc(1)
P02751_N542_HexNAc(4)Hex(5)Fuc(1)NeuAc(1)
P02751_N542_HexNAc(4)Hex(5)Fuc(1)NeuAc(1)
P02751_N542_HexNAc(4)Hex(5)Fuc(2)
P02751_N542_HexNAc(4)Hex(5)NeuAc(1)
P02751_N542_HexNAc(4)Hex(5)NeuAc(1)
P02751_N542_HexNAc(4)Hex(5)NeuAc(2)
P02751_N542_HexNAc(4)Hex(5)NeuAc(2)
P02763_N103_HexNAc(1)
P02763_N56_HexNAc(4)Hex(5)NeuAc(1)
P02763_N56_HexNAc(4)Hex(5)NeuAc(2)
P02763_N56_HexNAc(5)Hex(6)NeuAc(2)
P02763_N56_HexNAc(5)Hex(6)NeuAc(3)
P02763_N93_HexNAc(4)Hex(5)NeuAc(2)
P02763_N93_HexNAc(5)Hex(6)NeuAc(3)
P02763_N93_HexNAc(6)Hex(7)NeuAc(3)
P02787_N432_HexNAc(4)Hex(5)Fuc(2)NeuAc(1)
P02787_N432_HexNAc(4)Hex(5)NeuAc(2)
P02787_N630_HexNAc(2)Hex(11)
P02787_N630_HexNAc(4)Hex(5)NeuAc(2)
P02788_N497_HexNAc(4)Hex(5)Fuc(1)NeuAc(1)
P02788_N497_HexNAc(4)Hex(5)Fuc(2)NeuAc(1)
P02788_N497_HexNAc(4)Hex(5)Fuc(3)
P02788_N497_HexNAc(4)Hex(5)NeuAc(1)
P02788_N497_HexNAc(4)Hex(5)NeuAc(2)
P02790_N187_HexNAc(4)Hex(5)NeuAc(2)
P02790_N246_HexNAc(4)Hex(5)NeuAc(2)
P02790_N453_HexNAc(4)Hex(5)NeuAc(2)
P04004_N169_HexNAc(1)
P04004_N169_HexNAc(3)Hex(4)NeuAc(1)
P04004_N169_HexNAc(3)Hex(5)NeuAc(1)
P04004_N169_HexNAc(3)Hex(6)NeuAc(1)
P04004_N169_HexNAc(4)Hex(5)NeuAc(1)
P04004_N169_HexNAc(4)Hex(5)NeuAc(2)
P04004_N242_HexNAc(3)Hex(4)NeuAc(1)
P04004_N242_HexNAc(4)Hex(5)Fuc(1)NeuAc(2)
P04004_N242_HexNAc(4)Hex(5)NeuAc(1)
P04004_N242_HexNAc(4)Hex(5)NeuAc(2)
P04004_N242_HexNAc(5)Hex(6)Fuc(1)NeuAc(2)
P04004_N242_HexNAc(5)Hex(6)Fuc(1)NeuAc(3)
P04004_N242_HexNAc(5)Hex(6)Fuc(2)NeuAc(1)
P04004_N242_HexNAc(5)Hex(6)NeuAc(3)
P04004_N242_HexNAc(7)Hex(8)
P04004_N242_HexNAc(7)Hex(8)Fuc(1)NeuAc(1)
P04004_N86_HexNAc(4)Hex(5)NeuAc(2)
P04216_N119_HexNAc(2)Hex(5)
P04216_N119_HexNAc(4)Hex(5)Fuc(1)
P04216_N119_HexNAc(4)Hex(5)Fuc(1)NeuAc(1)
P04216_N119_HexNAc(4)Hex(5)Fuc(1)NeuAc(2)
P04216_N119_HexNAc(5)Hex(4)Fuc(1)
P04216_N119_HexNAc(5)Hex(5)Fuc(1)
P04216_N119_HexNAc(6)Hex(7)
P04216_N42_HexNAc(2)Hex(12)
P04216_N42_HexNAc(3)Hex(4)Fuc(1)NeuAc(1)
P04216_N42_HexNAc(4)Hex(5)Fuc(1)
P04216_N42_HexNAc(4)Hex(5)Fuc(1)NeuAc(1)
P04216_N42_HexNAc(5)Hex(4)Fuc(1)
P04216_N42_HexNAc(5)Hex(5)Fuc(3)
P04216_N42_HexNAc(5)Hex(6)Fuc(1)NeuAc(1)
P04216_N42_HexNAc(5)Hex(6)Fuc(3)NeuAc(1)
P04216_N42_HexNAc(6)Hex(5)Fuc(1)
P04216_N79_HexNAc(4)Hex(5)Fuc(1)
P04216_N79_HexNAc(4)Hex(5)Fuc(1)
P04216_N79_HexNAc(4)Hex(5)Fuc(1)NeuAc(1)
P04216_N79_HexNAc(5)Hex(5)Fuc(1)
P04233_N130_HexNAc(2)Hex(6)
P04233_N130_HexNAc(2)Hex(6)
P04233_N130_HexNAc(2)Hex(7)
P04233_N130_HexNAc(2)Hex(8)
P04233_N130_HexNAc(2)Hex(8)
P04233_N130_HexNAc(2)Hex(9)
P04233_N130_HexNAc(6)Hex(8)Fuc(1)NeuAc(1)
P04233_N136_HexNAc(2)Hex(8)
P04233_N136_HexNAc(2)Hex(9)
P04275_N2223_HexNAc(4)Hex(5)Fuc(1)NeuAc(1)
P04275_N2223_HexNAc(5)Hex(6)Fuc(1)NeuAc(1)
P04275_N2290_HexNAc(2)Hex(8)
P04275_N2290_HexNAc(2)Hex(9)
P04275_N2585_HexNAc(4)Hex(5)Fuc(2)NeuAc(1)
P04275_N2790_HexNAc(4)Hex(5)Fuc(2)NeuAc(1)
P04275_N857_HexNAc(4)Hex(5)Fuc(1)NeuAc(1)
P04406_N239_HexNAc(2)Hex(10)
P04424_N25_HexNAc(4)Hex(5)Fuc(1)
P04424_N25_HexNAc(5)Hex(5)Fuc(1)NeuAc(1)
P04424_N25_HexNAc(5)Hex(6)NeuAc(1)
P04439_N110_HexNAc(2)Hex(8)
P04439_N110_HexNAc(2)Hex(9)
P04632_N93_HexNAc(3)Hex(4)Fuc(1)
P04733_N4_HexNAc(1)
P04746_N427_HexNAc(7)Hex(3)
P04746_N427_HexNAc(7)Hex(3)
P04746_N476_HexNAc(2)Hex(5)
P04746_N476_HexNAc(2)Hex(7)
P04746_N476_HexNAc(2)Hex(8)
P04746_N476_HexNAc(2)Hex(8)
P04746_N476_HexNAc(5)Hex(5)Fuc(2)
P04746_N476_HexNAc(5)Hex(5)Fuc(3)
P04746_N476_HexNAc(5)Hex(5)Fuc(3)
P04746_N476_HexNAc(6)Hex(5)Fuc(2)
P04746_N476_HexNAc(8)Hex(7)
P04746_N476_HexNAc(8)Hex(7)
P04843_N299_HexNAc(2)Hex(5)
P04843_N299_HexNAc(2)Hex(5)
P04843_N299_HexNAc(2)Hex(5)Phospho(2)
P04843_N299_HexNAc(2)Hex(6)
P04843_N299_HexNAc(2)Hex(6)
P04843_N299_HexNAc(2)Hex(6)
P04843_N299_HexNAc(2)Hex(6)
P04843_N299_HexNAc(2)Hex(6)
P04843_N299_HexNAc(2)Hex(7)
P04843_N299_HexNAc(2)Hex(7)
P04843_N299_HexNAc(2)Hex(7)
P04843_N299_HexNAc(2)Hex(7)
P04843_N299_HexNAc(2)Hex(8)
P04843_N299_HexNAc(2)Hex(8)
P04843_N299_HexNAc(6)Hex(3)
P04844_N106_HexNAc(1)
P04844_N106_HexNAc(2)Hex(5)
P04844_N106_HexNAc(2)Hex(6)
P04844_N106_HexNAc(3)Hex(3)Fuc(1)
P04844_N106_HexNAc(4)Hex(3)Fuc(1)
P05026_N193_HexNAc(1)Fuc(1)
P05090_N65_HexNAc(2)Hex(9)
P05090_N65_HexNAc(4)Hex(5)Fuc(2)NeuAc(1)
P05090_N65_HexNAc(4)Hex(5)NeuAc(2)
P05090_N98_HexNAc(2)Hex(3)
P05090_N98_HexNAc(2)Hex(8)
P05090_N98_HexNAc(3)Hex(4)Fuc(1)NeuAc(1)
P05090_N98_HexNAc(4)Hex(5)Fuc(1)
P05090_N98_HexNAc(4)Hex(5)Fuc(1)NeuAc(1)
P05090_N98_HexNAc(4)Hex(5)Fuc(1)NeuAc(2)
P05090_N98_HexNAc(4)Hex(5)NeuAc(1)
P05090_N98_HexNAc(5)Hex(3)Fuc(1)NeuAc(1)
P05107_N212_HexNAc(6)Hex(7)Fuc(1)NeuAc(1)
P05154_N262_HexNAc(2)Hex(9)
P05155_N238_HexNAc(2)Hex(8)
P05155_N238_HexNAc(2)Hex(9)
P05155_N25_HexNAc(2)Hex(6)Phospho(1)
P05155_N253_HexNAc(2)Hex(9)
P05155_N253_HexNAc(4)Hex(5)NeuAc(2)
P05155_N69_HexNAc(10)Hex(7)
P05155_N69_HexNAc(2)Hex(8)
P05155_N69_HexNAc(2)Hex(8)
P05156_N103_HexNAc(2)Hex(9)
P05156_N103_HexNAc(4)Hex(5)Fuc(4)
P05156_N494_HexNAc(2)Hex(6)
P05156_N494_HexNAc(2)Hex(7)
P05156_N494_HexNAc(2)Hex(8)
P05156_N494_HexNAc(2)Hex(9)
P05164_N323_HexNAc(2)Hex(2)Fuc(1)
P05164_N323_HexNAc(2)Hex(6)
P05164_N323_HexNAc(2)Hex(6)Phospho(1)
P05164_N355_HexNAc(2)Hex(5)
P05164_N355_HexNAc(2)Hex(5)
P05164_N355_HexNAc(2)Hex(6)
P05164_N355_HexNAc(2)Hex(6)
P05164_N355_HexNAc(2)Hex(6)
P05164_N355_HexNAc(5)Hex(6)NeuAc(1)
P05164_N355_HexNAc(5)Hex(8)Fuc(1)
P05164_N391_HexNAc(2)Hex(3)
P05164_N391_HexNAc(2)Hex(4)
P05164_N391_HexNAc(2)Hex(5)
P05164_N391_HexNAc(2)Hex(6)
P05164_N483_HexNAc(2)Hex(5)Fuc(1)
P05164_N483_HexNAc(3)Hex(3)Fuc(1)
P05164_N483_HexNAc(3)Hex(4)Fuc(2)
P05164_N483_HexNAc(4)Hex(4)Fuc(2)
P05362_N183_HexNAc(6)Hex(7)Fuc(1)NeuAc(2)
P05556_N212_HexNAc(2)Hex(7)
P05556_N212_HexNAc(2)Hex(7)
P05556_N212_HexNAc(2)Hex(7)
P05556_N212_HexNAc(2)Hex(7)
P05556_N212_HexNAc(2)Hex(8)
P05556_N212_HexNAc(2)Hex(8)
P05556_N212_HexNAc(2)Hex(8)
P05556_N212_HexNAc(2)Hex(9)
P05556_N212_HexNAc(2)Hex(9)
P05556_N212_HexNAc(4)Hex(5)Fuc(1)
P05556_N212_HexNAc(4)Hex(5)Fuc(1)NeuAc(1)
P05556_N212_HexNAc(4)Hex(5)Fuc(1)NeuAc(1)
P05556_N212_HexNAc(4)Hex(5)Fuc(3)
P05556_N212_HexNAc(5)Hex(4)Fuc(1)
P05556_N212_HexNAc(5)Hex(5)Fuc(1)
P05556_N212_HexNAc(5)Hex(6)Fuc(2)NeuAc(1)
P05556_N212_HexNAc(6)Hex(7)
P05556_N212_HexNAc(6)Hex(7)Fuc(1)NeuAc(1)
P05556_N269_HexNAc(2)Hex(9)
P05556_N269_HexNAc(4)Hex(5)
P05556_N269_HexNAc(4)Hex(5)Fuc(1)NeuAc(1)
P05556_N269_HexNAc(4)Hex(5)NeuAc(1)
P05556_N269_HexNAc(5)Hex(5)
P05556_N406_HexNAc(2)Hex(7)
P05556_N406_HexNAc(2)Hex(8)
P05556_N406_HexNAc(2)Hex(8)
P05556_N406_HexNAc(2)Hex(9)
P05556_N406_HexNAc(2)Hex(9)
P05556_N406_HexNAc(4)Hex(5)Fuc(1)
P05556_N406_HexNAc(4)Hex(5)Fuc(1)
P05556_N406_HexNAc(4)Hex(5)Fuc(1)NeuAc(1)
P05556_N406_HexNAc(4)Hex(5)Fuc(1)NeuAc(1)
P05556_N406_HexNAc(4)Hex(5)Fuc(1)NeuAc(1)
P05556_N406_HexNAc(4)Hex(5)Fuc(1)NeuAc(1)
P05556_N481_HexNAc(2)Hex(5)
P05556_N481_HexNAc(2)Hex(6)
P05556_N481_HexNAc(2)Hex(8)
P05556_N481_HexNAc(2)Hex(9)
P05556_N481_HexNAc(3)Hex(3)
P05556_N481_HexNAc(4)Hex(3)
P05556_N481_HexNAc(4)Hex(5)Fuc(2)
P05556_N481_HexNAc(4)Hex(5)NeuAc(2)
P05556_N50_HexNAc(2)Hex(6)
P05556_N50_HexNAc(2)Hex(7)
P05556_N50_HexNAc(2)Hex(7)
P05556_N50_HexNAc(2)Hex(8)
P05556_N50_HexNAc(2)Hex(8)
P05556_N50_HexNAc(4)Hex(4)Fuc(1)NeuAc(1)
P05556_N520_HexNAc(2)Hex(5)
P05556_N520_HexNAc(2)Hex(6)
P05556_N520_HexNAc(2)Hex(7)
P05556_N520_HexNAc(2)Hex(7)
P05556_N520_HexNAc(2)Hex(8)
P05556_N520_HexNAc(6)Hex(3)
P05556_N584_HexNAc(1)
P05556_N584_HexNAc(1)
P05556_N584_HexNAc(1)
P05556_N584_HexNAc(1)
P05556_N584_HexNAc(1)
P05556_N669_HexNAc(2)Hex(5)
P05556_N669_HexNAc(2)Hex(5)
P05556_N669_HexNAc(2)Hex(6)
P05556_N669_HexNAc(2)Hex(6)
P05556_N669_HexNAc(2)Hex(9)
P05787_N313_HexNAc(2)Hex(10)
P05787_N313_HexNAc(2)Hex(5)
P05787_N313_HexNAc(2)Hex(6)
P05787_N313_HexNAc(2)Hex(7)
P05787_N313_HexNAc(2)Hex(8)
P05787_N313_HexNAc(2)Hex(9)
P05787_N313_HexNAc(4)Hex(5)
P05787_N313_HexNAc(4)Hex(5)NeuAc(1)
P05787_N313_HexNAc(6)Hex(6)Fuc(1)NeuAc(1)
P05787_N313_HexNAc(8)Hex(4)
P05787_N313_HexNAc(8)Hex(9)Fuc(1)NeuAc(3)
P05787_N408_HexNAc(2)
P05787_N408_HexNAc(3)Hex(6)
P05787_N69_HexNAc(2)Hex(5)Phospho(1)
P05787_N69_HexNAc(6)Hex(7)
P05997_N1400_HexNAc(2)Hex(6)
P06213_N242_HexNAc(2)Hex(6)
P06213_N242_HexNAc(2)Hex(7)
P06213_N242_HexNAc(2)Hex(8)
P06213_N242_HexNAc(2)Hex(9)
P06213_N424_HexNAc(2)Hex(9)
P06213_N424_HexNAc(5)Hex(6)Fuc(1)
P06213_N43_HexNAc(2)Hex(5)
P06213_N43_HexNAc(2)Hex(7)
P06213_N43_HexNAc(2)Hex(8)
P06213_N43_HexNAc(2)Hex(9)
P06213_N445_HexNAc(2)Hex(9)
P06213_N445_HexNAc(5)Hex(6)Fuc(1)
P06213_N445_HexNAc(5)Hex(6)Fuc(2)
P06213_N445_HexNAc(6)Hex(6)Fuc(1)
P06213_N445_HexNAc(6)Hex(6)Fuc(2)
P06213_N445_HexNAc(6)Hex(7)Fuc(1)
P06213_N920_HexNAc(2)Hex(9)
P06756_N488_HexNAc(2)Hex(5)
P06756_N554_HexNAc(2)Hex(7)
P06756_N554_HexNAc(2)Hex(8)
P06756_N554_HexNAc(2)Hex(9)
P06756_N615_HexNAc(2)Hex(8)
P06756_N615_HexNAc(2)Hex(9)
P06756_N74_HexNAc(3)Hex(4)NeuGc(1)
P06756_N945_HexNAc(2)Hex(5)
P06756_N945_HexNAc(2)Hex(6)
P06756_N945_HexNAc(2)Hex(7)
P06756_N945_HexNAc(2)Hex(8)
P06756_N945_HexNAc(2)Hex(9)
P06756_N945_HexNAc(3)Hex(6)
P06756_N945_HexNAc(4)Hex(5)Fuc(1)
P06865_N157_HexNAc(2)Hex(8)
P07305_N4_HexNAc(3)Hex(7)Phospho(2)
P07339_N263_HexNAc(1)
P07339_N263_HexNAc(1)Fuc(1)
P07339_N263_HexNAc(2)Hex(2)
P07339_N263_HexNAc(2)Hex(2)Fuc(1)
P07339_N263_HexNAc(2)Hex(3)
P07339_N263_HexNAc(2)Hex(4)
P07339_N263_HexNAc(2)Hex(4)Fuc(1)
P07339_N263_HexNAc(2)Hex(5)
P07339_N263_HexNAc(2)Hex(5)Fuc(1)
P07339_N263_HexNAc(2)Hex(6)
P07339_N263_HexNAc(2)Hex(6)Phospho(1)
P07339_N263_HexNAc(2)Hex(7)
P07339_N263_HexNAc(2)Hex(7)Phospho(1)
P07339_N263_HexNAc(2)Hex(8)
P07357_N437_HexNAc(4)Hex(5)NeuAc(2)
P07358_N243_HexNAc(4)Hex(5)
P07358_N243_HexNAc(4)Hex(5)NeuAc(1)
P07358_N243_HexNAc(4)Hex(5)NeuAc(2)
P07585_N211_HexNAc(2)Hex(4)
P07585_N211_HexNAc(2)Hex(5)
P07585_N211_HexNAc(2)Hex(5)
P07585_N211_HexNAc(2)Hex(5)Phospho(1)
P07585_N211_HexNAc(2)Hex(6)
P07585_N211_HexNAc(2)Hex(7)Phospho(1)
P07585_N211_HexNAc(3)Hex(12)
P07585_N211_HexNAc(3)Hex(3)
P07585_N211_HexNAc(3)Hex(3)
P07585_N211_HexNAc(3)Hex(4)
P07585_N211_HexNAc(3)Hex(4)
P07585_N211_HexNAc(3)Hex(4)Fuc(2)
P07585_N211_HexNAc(3)Hex(4)Fuc(2)
P07585_N211_HexNAc(3)Hex(4)NeuAc(1)
P07585_N211_HexNAc(3)Hex(5)
P07585_N211_HexNAc(3)Hex(5)
P07585_N211_HexNAc(3)Hex(5)NeuAc(1)
P07585_N211_HexNAc(3)Hex(5)NeuAc(1)
P07585_N211_HexNAc(3)Hex(6)
P07585_N211_HexNAc(3)Hex(6)
P07585_N211_HexNAc(3)Hex(6)Fuc(1)NeuAc(1)
P07585_N211_HexNAc(3)Hex(6)NeuAc(1)
P07585_N211_HexNAc(3)Hex(6)NeuAc(1)
P07585_N211_HexNAc(3)Hex(6)NeuGc(1)
P07585_N211_HexNAc(3)Hex(6)NeuGc(1)
P07585_N211_HexNAc(3)Hex(6)Phospho(1)
P07585_N211_HexNAc(4)Hex(3)
P07585_N211_HexNAc(4)Hex(4)
P07585_N211_HexNAc(4)Hex(4)
P07585_N211_HexNAc(4)Hex(4)Fuc(2)
P07585_N211_HexNAc(4)Hex(4)NeuAc(1)
P07585_N211_HexNAc(4)Hex(5)
P07585_N211_HexNAc(4)Hex(5)
P07585_N211_HexNAc(4)Hex(5)Fuc(1)
P07585_N211_HexNAc(4)Hex(5)Fuc(1)
P07585_N211_HexNAc(4)Hex(5)Fuc(1)NeuAc(1)
P07585_N211_HexNAc(4)Hex(5)Fuc(1)NeuAc(2)
P07585_N211_HexNAc(4)Hex(5)Fuc(2)
P07585_N211_HexNAc(4)Hex(5)Fuc(2)
P07585_N211_HexNAc(4)Hex(5)Fuc(2)NeuAc(1)
P07585_N211_HexNAc(4)Hex(5)Fuc(3)
P07585_N211_HexNAc(4)Hex(5)Fuc(3)NeuAc(1)
P07585_N211_HexNAc(4)Hex(5)Fuc(4)
P07585_N211_HexNAc(4)Hex(5)NeuAc(1)
P07585_N211_HexNAc(4)Hex(5)NeuAc(1)
P07585_N211_HexNAc(4)Hex(5)NeuAc(2)
P07585_N211_HexNAc(4)Hex(6)Fuc(1)
P07585_N211_HexNAc(5)Hex(4)
P07585_N211_HexNAc(5)Hex(4)NeuAc(1)
P07585_N211_HexNAc(5)Hex(5)
P07585_N211_HexNAc(5)Hex(6)Fuc(1)NeuAc(2)NeuGc(1)
P07585_N211_HexNAc(6)Hex(11)Fuc(1)
P07585_N211_HexNAc(7)Hex(8)Fuc(1)NeuAc(2)
P07585_N262_HexNAc(3)Hex(4)
P07585_N262_HexNAc(3)Hex(4)Fuc(1)
P07585_N262_HexNAc(3)Hex(4)Fuc(1)
P07585_N262_HexNAc(3)Hex(4)Fuc(1)NeuAc(1)
P07585_N262_HexNAc(3)Hex(4)Fuc(1)NeuAc(1)
P07585_N262_HexNAc(4)Hex(3)Fuc(1)
P07585_N262_HexNAc(4)Hex(3)Fuc(1)
P07585_N262_HexNAc(4)Hex(3)NeuGc(1)
P07585_N262_HexNAc(4)Hex(4)Fuc(1)
P07585_N262_HexNAc(4)Hex(4)Fuc(1)
P07585_N262_HexNAc(4)Hex(4)Fuc(1)NeuAc(1)
P07585_N262_HexNAc(4)Hex(4)Fuc(1)NeuAc(1)
P07585_N262_HexNAc(4)Hex(5)Fuc(1)
P07585_N262_HexNAc(4)Hex(5)Fuc(1)
P07585_N262_HexNAc(4)Hex(5)Fuc(1)NeuAc(1)
P07585_N262_HexNAc(4)Hex(5)Fuc(1)NeuAc(1)
P07585_N262_HexNAc(4)Hex(5)Fuc(1)NeuAc(1)NeuGc(1)
P07585_N262_HexNAc(4)Hex(5)Fuc(1)NeuAc(2)
P07585_N262_HexNAc(4)Hex(5)Fuc(1)NeuAc(2)
P07585_N262_HexNAc(4)Hex(5)Fuc(3)
P07585_N262_HexNAc(4)Hex(5)Fuc(3)NeuAc(1)
P07585_N262_HexNAc(4)Hex(5)Fuc(3)NeuAc(1)
P07585_N262_HexNAc(4)Hex(6)NeuAc(1)
P07585_N262_HexNAc(5)Hex(3)Fuc(1)
P07585_N262_HexNAc(5)Hex(3)Fuc(1)
P07585_N262_HexNAc(5)Hex(3)Fuc(1)NeuAc(1)
P07585_N262_HexNAc(5)Hex(4)Fuc(1)
P07585_N262_HexNAc(5)Hex(4)Fuc(1)
P07585_N262_HexNAc(5)Hex(4)Fuc(1)NeuAc(1)
P07585_N262_HexNAc(5)Hex(4)Fuc(1)NeuAc(1)
P07585_N262_HexNAc(5)Hex(4)Fuc(1)NeuAc(2)
P07585_N262_HexNAc(5)Hex(4)NeuAc(1)
P07585_N262_HexNAc(5)Hex(5)Fuc(1)
P07585_N262_HexNAc(5)Hex(5)Fuc(1)NeuAc(1)
P07585_N262_HexNAc(5)Hex(6)Fuc(1)
P07585_N262_HexNAc(5)Hex(6)Fuc(1)NeuAc(1)
P07585_N262_HexNAc(5)Hex(6)Fuc(1)NeuAc(2)
P07585_N262_HexNAc(5)Hex(6)Fuc(1)NeuAc(3)
P07585_N262_HexNAc(6)Hex(3)Fuc(1)NeuAc(1)
P07585_N262_HexNAc(6)Hex(4)Fuc(1)
P07585_N262_HexNAc(6)Hex(5)Fuc(1)
P07585_N262_HexNAc(6)Hex(7)
P07585_N303_HexNAc(10)Hex(7)
P07585_N303_HexNAc(4)Hex(5)Fuc(1)
P07585_N303_HexNAc(4)Hex(5)Fuc(1)NeuAc(1)
P07585_N303_HexNAc(4)Hex(5)Fuc(1)NeuAc(1)
P07585_N303_HexNAc(4)Hex(5)Fuc(1)NeuAc(1)
P07585_N303_HexNAc(4)Hex(5)Fuc(1)NeuAc(2)
P07585_N303_HexNAc(4)Hex(5)Fuc(1)NeuAc(2)
P07585_N303_HexNAc(4)Hex(5)Fuc(2)NeuAc(1)
P07585_N303_HexNAc(4)Hex(5)Fuc(3)NeuAc(1)
P07585_N303_HexNAc(4)Hex(5)Fuc(3)NeuAc(1)
P07585_N303_HexNAc(5)Hex(4)Fuc(1)
P07585_N303_HexNAc(5)Hex(4)Fuc(1)NeuAc(1)
P07585_N303_HexNAc(5)Hex(5)Fuc(1)
P07585_N303_HexNAc(5)Hex(5)Fuc(1)NeuAc(2)
P07585_N303_HexNAc(5)Hex(6)Fuc(1)
P07585_N303_HexNAc(5)Hex(6)Fuc(1)NeuAc(1)
P07585_N303_HexNAc(5)Hex(6)Fuc(1)NeuAc(1)
P07585_N303_HexNAc(5)Hex(6)Fuc(1)NeuAc(2)
P07585_N303_HexNAc(5)Hex(6)Fuc(1)NeuAc(3)
P07585_N303_HexNAc(5)Hex(6)Fuc(3)NeuAc(1)
P07585_N303_HexNAc(6)Hex(5)Fuc(1)
P07585_N303_HexNAc(6)Hex(7)
P07602_N215_HexNAc(2)Hex(2)Fuc(1)
P07602_N332_HexNAc(2)Hex(2)
P07602_N332_HexNAc(2)Hex(2)Fuc(1)
P07602_N332_HexNAc(2)Hex(2)Fuc(1)
P07602_N332_HexNAc(2)Hex(4)
P07602_N332_HexNAc(2)Hex(5)
P07602_N332_HexNAc(2)Hex(6)
P07602_N332_HexNAc(2)Hex(6)
P07602_N332_HexNAc(2)Hex(6)Phospho(1)
P07602_N332_HexNAc(2)Hex(6)Phospho(1)
P07602_N332_HexNAc(2)Hex(7)
P07602_N332_HexNAc(2)Hex(7)Phospho(1)
P07711_N221_HexNAc(2)Hex(2)
P07711_N221_HexNAc(2)Hex(2)
P07737_N100_HexNAc(2)Hex(6)
P07942_N1041_HexNAc(1)
P07942_N1041_HexNAc(1)
P07942_N1041_HexNAc(1)Fuc(1)
P07942_N1041_HexNAc(1)Fuc(1)
P07942_N1041_HexNAc(2)Hex(5)
P07942_N1041_HexNAc(2)Hex(5)
P07942_N1041_HexNAc(2)Hex(5)
P07942_N1041_HexNAc(4)Hex(4)Fuc(1)
P07942_N1041_HexNAc(4)Hex(4)NeuAc(1)
P07942_N1041_HexNAc(4)Hex(5)Fuc(1)
P07942_N1041_HexNAc(4)Hex(5)Fuc(1)NeuAc(1)
P07942_N1041_HexNAc(4)Hex(5)Fuc(1)NeuAc(2)
P07942_N1041_HexNAc(4)Hex(5)Fuc(3)
P07942_N1041_HexNAc(7)Hex(7)Fuc(1)
P07942_N1279_HexNAc(1)Fuc(1)
P07942_N1279_HexNAc(2)Hex(6)
P07942_N1279_HexNAc(2)Hex(8)
P07942_N1279_HexNAc(4)Hex(5)Fuc(1)
P07942_N1279_HexNAc(4)Hex(5)Fuc(1)NeuAc(1)
P07942_N1279_HexNAc(4)Hex(5)Fuc(1)NeuAc(2)
P07942_N1279_HexNAc(5)Hex(4)Fuc(1)
P07942_N1487_HexNAc(4)Hex(5)Fuc(1)
P07942_N1487_HexNAc(4)Hex(5)Fuc(1)NeuAc(1)
P07942_N1487_HexNAc(5)Hex(4)Fuc(1)
P07942_N1487_HexNAc(5)Hex(5)Fuc(1)
P07942_N356_HexNAc(4)Hex(5)Fuc(1)
P07942_N356_HexNAc(4)Hex(5)Fuc(1)NeuAc(1)
P07942_N356_HexNAc(4)Hex(6)NeuAc(1)
P07942_N519_HexNAc(4)Hex(5)Fuc(1)NeuAc(1)
P07942_N519_HexNAc(4)Hex(5)Fuc(1)NeuAc(1)
P07942_N519_HexNAc(4)Hex(5)Fuc(1)NeuAc(1)
P07942_N519_HexNAc(4)Hex(5)Fuc(3)
P07942_N519_HexNAc(5)Hex(5)Fuc(1)
P07942_N677_HexNAc(1)Fuc(1)
P07942_N677_HexNAc(2)Hex(6)
P07942_N677_HexNAc(2)Hex(7)
P07942_N677_HexNAc(2)Hex(8)
P07942_N677_HexNAc(2)Hex(9)
P07942_N677_HexNAc(3)Hex(3)Fuc(1)
P07942_N677_HexNAc(3)Hex(4)Fuc(1)
P07942_N677_HexNAc(3)Hex(4)Fuc(1)NeuAc(1)
P07942_N677_HexNAc(4)Hex(5)Fuc(1)
P07942_N677_HexNAc(4)Hex(5)Fuc(1)NeuAc(1)
P07942_N677_HexNAc(4)Hex(5)Fuc(1)NeuAc(2)
P07942_N677_HexNAc(4)Hex(5)Fuc(1)NeuAc(2)
P07942_N677_HexNAc(4)Hex(5)Fuc(2)NeuAc(1)
P07942_N677_HexNAc(5)Hex(4)Fuc(1)
P07942_N677_HexNAc(5)Hex(5)Fuc(1)
P07942_N677_HexNAc(5)Hex(6)Fuc(1)
P07954_N450_HexNAc(8)Hex(3)Fuc(1)
P07996_N1067_HexNAc(4)Hex(5)
P07996_N1067_HexNAc(4)Hex(5)Fuc(2)NeuAc(1)
P07996_N1067_HexNAc(4)Hex(5)NeuAc(1)
P07996_N1067_HexNAc(5)Hex(4)
P07998_N104_HexNAc(2)Hex(6)
P07998_N104_HexNAc(2)Hex(8)
P07998_N104_HexNAc(2)Hex(8)
P07998_N104_HexNAc(5)Hex(5)Fuc(1)
P07998_N104_HexNAc(5)Hex(5)Fuc(2)
P07998_N104_HexNAc(5)Hex(6)Fuc(2)
P07998_N104_HexNAc(5)Hex(6)Fuc(3)
P07998_N104_HexNAc(5)Hex(6)Fuc(3)NeuAc(1)
P07998_N104_HexNAc(6)Hex(6)Fuc(3)
P07998_N104_HexNAc(6)Hex(6)NeuAc(2)
P07998_N62_HexNAc(2)Hex(8)
P07998_N62_HexNAc(2)Hex(9)
P07998_N62_HexNAc(4)Hex(5)Fuc(2)
P07998_N62_HexNAc(4)Hex(5)Fuc(3)
P07998_N62_HexNAc(4)Hex(5)Fuc(4)
P07998_N62_HexNAc(4)Hex(5)Fuc(4)
P07998_N62_HexNAc(4)Hex(6)Fuc(1)NeuAc(1)
P07998_N62_HexNAc(5)Hex(3)Fuc(1)
P07998_N62_HexNAc(5)Hex(4)Fuc(1)
P07998_N62_HexNAc(5)Hex(4)Fuc(1)
P07998_N62_HexNAc(5)Hex(4)Fuc(2)
P08123_N1267_HexNAc(2)Hex(6)
P08123_N1267_HexNAc(2)Hex(7)
P08123_N1267_HexNAc(2)Hex(7)
P08123_N207_HexNAc(2)Hex(3)Phospho(1)
P08123_N207_HexNAc(3)Hex(4)Phospho(2)
P08123_N207_HexNAc(3)Hex(5)NeuAc(1)
P08123_N207_HexNAc(3)Hex(9)Phospho(2)
P08123_N207_HexNAc(4)Hex(6)
P08123_N207_HexNAc(5)Hex(4)Fuc(1)
P08123_N207_HexNAc(5)Hex(5)Fuc(1)NeuAc(1)
P08123_N207_HexNAc(6)Hex(4)
P08123_N207_HexNAc(9)Hex(6)
P08236_N272_HexNAc(2)Hex(2)
P08236_N272_HexNAc(2)Hex(3)
P08236_N272_HexNAc(2)Hex(4)
P08236_N272_HexNAc(2)Hex(4)Fuc(1)
P08236_N272_HexNAc(2)Hex(5)
P08236_N272_HexNAc(2)Hex(6)
P08246_N88_HexNAc(2)Hex(2)
P08311_N71_HexNAc(2)Hex(2)Fuc(1)
P08571_N151_HexNAc(4)Hex(5)NeuAc(1)
P08571_N151_HexNAc(4)Hex(5)NeuAc(1)
P08603_N1029_HexNAc(4)Hex(5)NeuAc(2)
P08603_N911_HexNAc(4)Hex(5)NeuAc(2)
P08648_N84_HexNAc(4)Hex(5)Fuc(1)
P08648_N84_HexNAc(4)Hex(5)NeuAc(1)
P08670_N337_HexNAc(6)Hex(7)NeuGc(2)
P08861_N114_HexNAc(2)Hex(10)
P08861_N114_HexNAc(2)Hex(10)
P08861_N114_HexNAc(2)Hex(6)
P08861_N114_HexNAc(2)Hex(7)
P08861_N114_HexNAc(2)Hex(7)
P08861_N114_HexNAc(2)Hex(8)
P08861_N114_HexNAc(2)Hex(8)
P08861_N114_HexNAc(2)Hex(9)
P08861_N114_HexNAc(3)Hex(11)
P08861_N114_HexNAc(3)Hex(3)Fuc(1)
P08861_N114_HexNAc(3)Hex(3)Fuc(1)
P08861_N114_HexNAc(3)Hex(3)Fuc(2)
P08861_N114_HexNAc(3)Hex(4)Fuc(1)
P08861_N114_HexNAc(3)Hex(4)Fuc(1)
P08861_N114_HexNAc(3)Hex(4)Fuc(1)NeuAc(1)
P08861_N114_HexNAc(3)Hex(4)Fuc(1)NeuAc(1)
P08861_N114_HexNAc(3)Hex(4)Fuc(2)
P08861_N114_HexNAc(3)Hex(5)NeuAc(1)
P08861_N114_HexNAc(3)Hex(6)Fuc(1)
P08861_N114_HexNAc(3)Hex(6)Fuc(1)
P08861_N114_HexNAc(3)Hex(6)Fuc(1)NeuAc(1)
P08861_N114_HexNAc(3)Hex(6)NeuAc(1)
P08861_N114_HexNAc(3)Hex(6)NeuAc(1)
P08861_N114_HexNAc(3)Hex(8)
P08861_N114_HexNAc(4)Hex(3)Fuc(1)
P08861_N114_HexNAc(4)Hex(3)Fuc(1)
P08861_N114_HexNAc(4)Hex(4)Fuc(1)
P08861_N114_HexNAc(4)Hex(4)Fuc(1)
P08861_N114_HexNAc(4)Hex(4)Fuc(1)NeuAc(1)
P08861_N114_HexNAc(4)Hex(4)Fuc(1)NeuAc(1)
P08861_N114_HexNAc(4)Hex(4)Fuc(2)
P08861_N114_HexNAc(4)Hex(4)Fuc(2)
P08861_N114_HexNAc(4)Hex(4)Fuc(2)NeuAc(1)
P08861_N114_HexNAc(4)Hex(4)Fuc(2)NeuAc(1)
P08861_N114_HexNAc(4)Hex(5)
P08861_N114_HexNAc(4)Hex(5)
P08861_N114_HexNAc(4)Hex(5)Fuc(1)
P08861_N114_HexNAc(4)Hex(5)Fuc(1)
P08861_N114_HexNAc(4)Hex(5)Fuc(1)NeuAc(1)
P08861_N114_HexNAc(4)Hex(5)Fuc(1)NeuAc(1)
P08861_N114_HexNAc(4)Hex(5)Fuc(2)
P08861_N114_HexNAc(4)Hex(5)Fuc(2)
P08861_N114_HexNAc(4)Hex(5)Fuc(2)NeuAc(1)
P08861_N114_HexNAc(4)Hex(5)Fuc(2)NeuAc(1)
P08861_N114_HexNAc(4)Hex(5)Fuc(3)
P08861_N114_HexNAc(4)Hex(5)Fuc(3)
P08861_N114_HexNAc(4)Hex(5)Fuc(4)
P08861_N114_HexNAc(4)Hex(5)Fuc(4)
P08861_N114_HexNAc(4)Hex(5)NeuAc(1)
P08861_N114_HexNAc(4)Hex(5)NeuAc(1)
P08861_N114_HexNAc(4)Hex(6)
P08861_N114_HexNAc(4)Hex(6)Fuc(1)
P08861_N114_HexNAc(4)Hex(6)Fuc(1)
P08861_N114_HexNAc(4)Hex(6)Fuc(1)NeuAc(1)
P08861_N114_HexNAc(4)Hex(6)Fuc(2)
P08861_N114_HexNAc(4)Hex(6)Fuc(2)
P08861_N114_HexNAc(4)Hex(6)Fuc(3)
P08861_N114_HexNAc(4)Hex(7)
P08861_N114_HexNAc(4)Hex(7)Fuc(1)
P08861_N114_HexNAc(4)Hex(7)NeuAc(1)
P08861_N114_HexNAc(5)Hex(3)Fuc(1)
P08861_N114_HexNAc(5)Hex(4)
P08861_N114_HexNAc(5)Hex(4)Fuc(1)
P08861_N114_HexNAc(5)Hex(4)Fuc(1)
P08861_N114_HexNAc(5)Hex(4)Fuc(1)NeuAc(1)
P08861_N114_HexNAc(5)Hex(4)Fuc(1)NeuAc(1)
P08861_N114_HexNAc(5)Hex(4)Fuc(2)
P08861_N114_HexNAc(5)Hex(4)Fuc(2)
P08861_N114_HexNAc(5)Hex(4)NeuAc(1)
P08861_N114_HexNAc(5)Hex(5)Fuc(1)
P08861_N114_HexNAc(5)Hex(5)Fuc(1)NeuAc(1)
P08861_N114_HexNAc(5)Hex(5)Fuc(1)NeuAc(1)
P08861_N114_HexNAc(5)Hex(5)Fuc(2)
P08861_N114_HexNAc(5)Hex(5)Fuc(2)
P08861_N114_HexNAc(5)Hex(5)Fuc(3)
P08861_N114_HexNAc(5)Hex(5)Fuc(3)
P08861_N114_HexNAc(5)Hex(5)NeuAc(2)
P08861_N114_HexNAc(5)Hex(6)
P08861_N114_HexNAc(5)Hex(6)Fuc(1)
P08861_N114_HexNAc(5)Hex(6)Fuc(1)NeuAc(1)
P08861_N114_HexNAc(5)Hex(6)Fuc(1)NeuAc(1)
P08861_N114_HexNAc(5)Hex(6)Fuc(1)NeuGc(1)
P08861_N114_HexNAc(5)Hex(6)Fuc(2)
P08861_N114_HexNAc(5)Hex(6)Fuc(2)
P08861_N114_HexNAc(5)Hex(6)Fuc(2)NeuAc(1)
P08861_N114_HexNAc(5)Hex(6)Fuc(2)NeuAc(1)
P08861_N114_HexNAc(5)Hex(6)Fuc(3)
P08861_N114_HexNAc(5)Hex(6)Fuc(3)
P08861_N114_HexNAc(5)Hex(6)Fuc(3)NeuAc(1)
P08861_N114_HexNAc(5)Hex(6)NeuAc(1)
P08861_N114_HexNAc(5)Hex(7)
P08861_N114_HexNAc(5)Hex(7)Fuc(1)
P08861_N114_HexNAc(6)Hex(4)Fuc(2)
P08861_N114_HexNAc(6)Hex(5)Fuc(1)
P08861_N114_HexNAc(6)Hex(5)Fuc(2)
P08861_N114_HexNAc(6)Hex(6)
P08861_N114_HexNAc(6)Hex(6)Fuc(1)NeuAc(1)
P08861_N114_HexNAc(6)Hex(6)Fuc(1)NeuAc(1)
P08861_N114_HexNAc(6)Hex(6)Fuc(1)NeuAc(3)
P08861_N114_HexNAc(6)Hex(6)Fuc(2)
P08861_N114_HexNAc(6)Hex(6)Fuc(3)
P08861_N114_HexNAc(6)Hex(7)Fuc(1)
P08861_N114_HexNAc(6)Hex(7)Fuc(1)NeuAc(1)
P08861_N114_HexNAc(6)Hex(7)Fuc(1)NeuAc(1)
P08861_N114_HexNAc(6)Hex(7)Fuc(4)
P08861_N114_HexNAc(7)Hex(6)
P08861_N114_HexNAc(7)Hex(7)Fuc(1)
P08861_N114_HexNAc(8)Hex(3)
P08861_N114_HexNAc(8)Hex(3)Fuc(1)
P08861_N114_HexNAc(8)Hex(8)Fuc(1)
P08861_N114_HexNAc(9)Hex(3)Fuc(1)
P08861_N153_HexNAc(2)Hex(7)Phospho(1)
P08861_N153_HexNAc(5)Hex(6)Fuc(3)
P08861_N153_HexNAc(5)Hex(8)
P08861_N153_HexNAc(9)Hex(3)
P08962_N130_HexNAc(1)
P08962_N130_HexNAc(1)Fuc(1)
P08962_N130_HexNAc(2)Hex(10)
P08962_N130_HexNAc(2)Hex(8)
P08962_N130_HexNAc(2)Hex(9)
P08962_N130_HexNAc(3)Hex(4)Fuc(1)
P08962_N130_HexNAc(4)Hex(4)Fuc(1)
P08962_N130_HexNAc(4)Hex(5)Fuc(1)
P08962_N130_HexNAc(4)Hex(5)Fuc(1)NeuAc(1)
P08962_N130_HexNAc(4)Hex(5)Fuc(3)
P08962_N130_HexNAc(4)Hex(7)Fuc(1)
P08962_N130_HexNAc(4)Hex(7)Fuc(1)
P08962_N130_HexNAc(5)Hex(4)NeuGc(1)
P08962_N130_HexNAc(5)Hex(5)Fuc(1)
P08962_N130_HexNAc(5)Hex(5)Fuc(1)NeuGc(1)
P08962_N130_HexNAc(5)Hex(5)NeuAc(1)NeuGc(1)
P08962_N130_HexNAc(5)Hex(6)Fuc(1)
P08962_N130_HexNAc(5)Hex(6)Fuc(1)NeuAc(1)
P08962_N130_HexNAc(5)Hex(6)Fuc(1)NeuAc(2)
P08962_N130_HexNAc(5)Hex(6)Fuc(1)NeuAc(3)
P08962_N130_HexNAc(5)Hex(6)Fuc(2)
P08962_N130_HexNAc(5)Hex(6)Fuc(2)NeuAc(1)
P08962_N130_HexNAc(5)Hex(6)Fuc(3)
P08962_N130_HexNAc(5)Hex(6)Fuc(3)NeuAc(1)
P08962_N130_HexNAc(5)Hex(6)NeuAc(1)
P08962_N130_HexNAc(6)Hex(6)Fuc(3)
P08962_N130_HexNAc(6)Hex(7)Fuc(1)
P08962_N130_HexNAc(6)Hex(7)Fuc(1)NeuAc(1)
P08962_N130_HexNAc(6)Hex(7)Fuc(1)NeuAc(1)
P08962_N130_HexNAc(6)Hex(7)Fuc(1)NeuAc(2)
P08962_N130_HexNAc(6)Hex(7)Fuc(4)
P08962_N130_HexNAc(6)Hex(7)NeuAc(1)
P08962_N130_HexNAc(6)Hex(7)NeuAc(1)
P08962_N130_HexNAc(7)Hex(8)Fuc(1)
P08962_N130_HexNAc(7)Hex(8)Fuc(1)NeuAc(1)
P08962_N130_HexNAc(7)Hex(8)Fuc(1)NeuAc(1)
P08962_N130_HexNAc(7)Hex(8)NeuAc(1)
P08962_N130_HexNAc(9)Hex(10)Fuc(1)
P08962_N150_HexNAc(5)Hex(6)Fuc(1)NeuAc(1)
P08962_N150_HexNAc(5)Hex(6)Fuc(2)
P08962_N150_HexNAc(5)Hex(6)Fuc(3)
P08962_N150_HexNAc(6)Hex(7)Fuc(1)NeuAc(1)
P09093_N114_HexNAc(1)Fuc(1)
P09093_N114_HexNAc(10)Hex(10)Fuc(1)
P09093_N114_HexNAc(2)Hex(10)
P09093_N114_HexNAc(2)Hex(5)
P09093_N114_HexNAc(2)Hex(5)Fuc(1)
P09093_N114_HexNAc(2)Hex(5)Fuc(1)
P09093_N114_HexNAc(2)Hex(6)
P09093_N114_HexNAc(2)Hex(6)
P09093_N114_HexNAc(2)Hex(6)Phospho(1)
P09093_N114_HexNAc(2)Hex(6)Phospho(1)
P09093_N114_HexNAc(2)Hex(7)
P09093_N114_HexNAc(2)Hex(7)
P09093_N114_HexNAc(2)Hex(8)
P09093_N114_HexNAc(2)Hex(8)Phospho(1)
P09093_N114_HexNAc(2)Hex(9)
P09093_N114_HexNAc(3)Hex(10)
P09093_N114_HexNAc(3)Hex(3)Fuc(1)
P09093_N114_HexNAc(3)Hex(3)Fuc(1)
P09093_N114_HexNAc(3)Hex(3)Fuc(2)
P09093_N114_HexNAc(3)Hex(3)Fuc(2)
P09093_N114_HexNAc(3)Hex(4)Fuc(1)
P09093_N114_HexNAc(3)Hex(4)Fuc(1)
P09093_N114_HexNAc(3)Hex(4)Fuc(1)NeuAc(1)
P09093_N114_HexNAc(3)Hex(4)Fuc(2)
P09093_N114_HexNAc(3)Hex(4)Fuc(2)
P09093_N114_HexNAc(3)Hex(4)NeuAc(1)
P09093_N114_HexNAc(3)Hex(5)Fuc(1)
P09093_N114_HexNAc(3)Hex(5)NeuAc(1)
P09093_N114_HexNAc(3)Hex(6)
P09093_N114_HexNAc(3)Hex(6)Fuc(1)
P09093_N114_HexNAc(3)Hex(6)Fuc(1)
P09093_N114_HexNAc(3)Hex(6)Fuc(1)NeuAc(1)
P09093_N114_HexNAc(3)Hex(6)Fuc(1)NeuGc(1)
P09093_N114_HexNAc(3)Hex(6)NeuAc(1)
P09093_N114_HexNAc(3)Hex(6)NeuAc(1)
P09093_N114_HexNAc(3)Hex(6)Phospho(1)
P09093_N114_HexNAc(3)Hex(7)Phospho(1)
P09093_N114_HexNAc(3)Hex(9)
P09093_N114_HexNAc(3)Hex(9)Phospho(1)
P09093_N114_HexNAc(4)Hex(3)Fuc(1)
P09093_N114_HexNAc(4)Hex(3)Fuc(2)
P09093_N114_HexNAc(4)Hex(3)Fuc(2)
P09093_N114_HexNAc(4)Hex(3)NeuAc(1)
P09093_N114_HexNAc(4)Hex(4)Fuc(1)
P09093_N114_HexNAc(4)Hex(4)Fuc(1)
P09093_N114_HexNAc(4)Hex(4)Fuc(1)NeuAc(1)
P09093_N114_HexNAc(4)Hex(4)Fuc(1)NeuAc(1)
P09093_N114_HexNAc(4)Hex(4)Fuc(1)NeuGc(1)
P09093_N114_HexNAc(4)Hex(4)Fuc(2)
P09093_N114_HexNAc(4)Hex(4)Fuc(2)NeuAc(1)
P09093_N114_HexNAc(4)Hex(4)Fuc(2)NeuAc(1)
P09093_N114_HexNAc(4)Hex(5)Fuc(1)
P09093_N114_HexNAc(4)Hex(5)Fuc(1)NeuAc(1)
P09093_N114_HexNAc(4)Hex(5)Fuc(1)NeuAc(1)
P09093_N114_HexNAc(4)Hex(5)Fuc(1)NeuAc(1)NeuGc(1)
P09093_N114_HexNAc(4)Hex(5)Fuc(1)NeuAc(2)
P09093_N114_HexNAc(4)Hex(5)Fuc(1)NeuAc(2)
P09093_N114_HexNAc(4)Hex(5)Fuc(2)
P09093_N114_HexNAc(4)Hex(5)Fuc(2)
P09093_N114_HexNAc(4)Hex(5)Fuc(2)NeuAc(1)
P09093_N114_HexNAc(4)Hex(5)Fuc(2)NeuAc(1)
P09093_N114_HexNAc(4)Hex(5)Fuc(3)
P09093_N114_HexNAc(4)Hex(5)Fuc(3)
P09093_N114_HexNAc(4)Hex(5)Fuc(3)NeuAc(1)
P09093_N114_HexNAc(4)Hex(5)Fuc(3)NeuAc(1)
P09093_N114_HexNAc(4)Hex(5)Fuc(3)NeuAc(2)
P09093_N114_HexNAc(4)Hex(5)Fuc(4)
P09093_N114_HexNAc(4)Hex(5)Fuc(4)
P09093_N114_HexNAc(4)Hex(6)
P09093_N114_HexNAc(4)Hex(6)Fuc(1)
P09093_N114_HexNAc(4)Hex(6)Fuc(1)
P09093_N114_HexNAc(4)Hex(6)Fuc(1)NeuAc(1)
P09093_N114_HexNAc(4)Hex(6)Fuc(2)
P09093_N114_HexNAc(4)Hex(6)Fuc(3)
P09093_N114_HexNAc(4)Hex(6)NeuAc(1)
P09093_N114_HexNAc(4)Hex(7)
P09093_N114_HexNAc(4)Hex(7)Fuc(1)
P09093_N114_HexNAc(4)Hex(7)NeuAc(1)
P09093_N114_HexNAc(5)Hex(3)Fuc(1)
P09093_N114_HexNAc(5)Hex(4)
P09093_N114_HexNAc(5)Hex(4)Fuc(1)
P09093_N114_HexNAc(5)Hex(4)Fuc(1)
P09093_N114_HexNAc(5)Hex(4)Fuc(1)NeuAc(1)
P09093_N114_HexNAc(5)Hex(4)Fuc(1)NeuAc(1)
P09093_N114_HexNAc(5)Hex(4)Fuc(1)NeuAc(2)
P09093_N114_HexNAc(5)Hex(4)Fuc(2)
P09093_N114_HexNAc(5)Hex(4)Fuc(2)
P09093_N114_HexNAc(5)Hex(4)NeuAc(1)
P09093_N114_HexNAc(5)Hex(5)Fuc(1)
P09093_N114_HexNAc(5)Hex(5)Fuc(1)
P09093_N114_HexNAc(5)Hex(5)Fuc(1)NeuAc(1)
P09093_N114_HexNAc(5)Hex(5)Fuc(1)NeuAc(2)
P09093_N114_HexNAc(5)Hex(5)Fuc(2)
P09093_N114_HexNAc(5)Hex(5)Fuc(2)
P09093_N114_HexNAc(5)Hex(5)Fuc(3)
P09093_N114_HexNAc(5)Hex(5)Fuc(3)
P09093_N114_HexNAc(5)Hex(5)NeuAc(2)
P09093_N114_HexNAc(5)Hex(5)NeuAc(2)
P09093_N114_HexNAc(5)Hex(6)
P09093_N114_HexNAc(5)Hex(6)Fuc(1)
P09093_N114_HexNAc(5)Hex(6)Fuc(1)NeuAc(1)
P09093_N114_HexNAc(5)Hex(6)Fuc(1)NeuAc(3)
P09093_N114_HexNAc(5)Hex(6)Fuc(2)
P09093_N114_HexNAc(5)Hex(6)Fuc(2)NeuAc(1)
P09093_N114_HexNAc(5)Hex(6)Fuc(2)NeuAc(1)
P09093_N114_HexNAc(5)Hex(6)Fuc(3)
P09093_N114_HexNAc(5)Hex(6)Fuc(3)NeuAc(1)
P09093_N114_HexNAc(5)Hex(7)
P09093_N114_HexNAc(5)Hex(7)Fuc(1)
P09093_N114_HexNAc(6)Hex(3)
P09093_N114_HexNAc(6)Hex(3)Fuc(2)NeuGc(1)
P09093_N114_HexNAc(6)Hex(4)Fuc(2)
P09093_N114_HexNAc(6)Hex(5)Fuc(1)NeuAc(1)
P09093_N114_HexNAc(6)Hex(5)Fuc(1)NeuAc(1)
P09093_N114_HexNAc(6)Hex(5)Fuc(1)NeuAc(2)
P09093_N114_HexNAc(6)Hex(5)Fuc(2)
P09093_N114_HexNAc(6)Hex(5)Fuc(2)
P09093_N114_HexNAc(6)Hex(6)
P09093_N114_HexNAc(6)Hex(6)Fuc(1)
P09093_N114_HexNAc(6)Hex(6)Fuc(1)NeuAc(1)
P09093_N114_HexNAc(6)Hex(6)Fuc(1)NeuAc(2)
P09093_N114_HexNAc(6)Hex(6)Fuc(2)
P09093_N114_HexNAc(6)Hex(6)Fuc(2)
P09093_N114_HexNAc(6)Hex(6)Fuc(3)
P09093_N114_HexNAc(6)Hex(6)NeuAc(1)
P09093_N114_HexNAc(6)Hex(6)NeuAc(2)
P09093_N114_HexNAc(6)Hex(7)
P09093_N114_HexNAc(6)Hex(7)Fuc(1)
P09093_N114_HexNAc(6)Hex(7)Fuc(1)NeuAc(1)
P09093_N114_HexNAc(6)Hex(7)Fuc(4)
P09093_N114_HexNAc(6)Hex(7)Fuc(4)NeuAc(1)
P09093_N114_HexNAc(6)Hex(7)Fuc(5)
P09093_N114_HexNAc(6)Hex(7)NeuAc(1)
P09093_N114_HexNAc(6)Hex(7)NeuAc(2)
P09093_N114_HexNAc(6)Hex(8)Fuc(1)NeuAc(1)
P09093_N114_HexNAc(7)Hex(4)
P09093_N114_HexNAc(7)Hex(7)
P09093_N114_HexNAc(7)Hex(8)
P09093_N114_HexNAc(7)Hex(8)Fuc(1)
P09093_N114_HexNAc(7)Hex(8)Fuc(1)NeuAc(1)
P09093_N114_HexNAc(7)Hex(8)Fuc(1)NeuAc(2)
P09093_N114_HexNAc(7)Hex(8)NeuAc(1)
P09093_N114_HexNAc(8)Hex(8)
P09093_N114_HexNAc(8)Hex(8)Fuc(1)
P09093_N114_HexNAc(8)Hex(9)Fuc(1)
P09093_N114_HexNAc(9)Hex(10)
P09093_N114_HexNAc(9)Hex(10)Fuc(1)
P09093_N114_HexNAc(9)Hex(9)Fuc(1)
P09093_N114_HexNAc(9)Hex(9)Fuc(1)
P09093_N153_HexNAc(2)Hex(7)Phospho(1)
P09093_N153_HexNAc(4)Hex(5)Fuc(1)
P09093_N153_HexNAc(4)Hex(5)Fuc(1)NeuAc(1)
P09093_N153_HexNAc(4)Hex(5)Fuc(2)NeuAc(1)
P09093_N153_HexNAc(4)Hex(5)Fuc(4)
P09093_N153_HexNAc(4)Hex(5)NeuAc(1)
P09093_N153_HexNAc(5)Hex(4)Fuc(1)
P09093_N153_HexNAc(5)Hex(4)Fuc(1)NeuAc(1)
P09093_N153_HexNAc(5)Hex(4)Fuc(2)
P09093_N153_HexNAc(5)Hex(5)
P09093_N153_HexNAc(5)Hex(5)Fuc(1)
P09093_N153_HexNAc(5)Hex(5)Fuc(2)
P09093_N153_HexNAc(5)Hex(5)Fuc(3)
P09093_N153_HexNAc(5)Hex(5)Fuc(3)
P09093_N153_HexNAc(5)Hex(5)NeuAc(2)
P09093_N153_HexNAc(5)Hex(5)NeuAc(2)
P09093_N153_HexNAc(5)Hex(6)Fuc(1)NeuAc(1)
P09093_N153_HexNAc(5)Hex(6)Fuc(2)
P09093_N153_HexNAc(5)Hex(6)Fuc(2)NeuAc(1)
P09093_N153_HexNAc(5)Hex(6)Fuc(2)NeuAc(1)
P09093_N153_HexNAc(5)Hex(6)Fuc(3)
P09093_N153_HexNAc(5)Hex(6)Fuc(3)NeuAc(1)
P09093_N153_HexNAc(5)Hex(6)NeuAc(1)
P09093_N153_HexNAc(5)Hex(8)
P09093_N153_HexNAc(6)Hex(6)NeuAc(1)
P09093_N153_HexNAc(7)Hex(8)
P09622_N93_HexNAc(4)Hex(5)Fuc(1)NeuAc(1)
P09758_N120_HexNAc(2)Hex(5)
P09758_N120_HexNAc(2)Hex(6)
P09758_N120_HexNAc(2)Hex(7)
P09758_N120_HexNAc(2)Hex(8)
P09758_N168_HexNAc(6)Hex(7)Fuc(5)
P0C0L4_N1328_HexNAc(2)Hex(5)
P0C0L4_N1328_HexNAc(2)Hex(8)
P0C0L4_N1328_HexNAc(4)Hex(5)Fuc(3)
P0C0L4_N1328_HexNAc(4)Hex(5)NeuAc(2)
P0C0L4_N1328_HexNAc(5)Hex(6)Fuc(3)
P0C0L4_N1391_HexNAc(2)Hex(8)
P0C0L4_N1391_HexNAc(4)Hex(5)Fuc(3)
P0C0L4_N1391_HexNAc(4)Hex(5)Fuc(3)
P0C0L4_N226_HexNAc(2)Hex(10)
P0C0L4_N226_HexNAc(2)Hex(8)
P0C0L4_N226_HexNAc(2)Hex(9)
P0C0L4_N226_HexNAc(2)Hex(9)
P0C0L4_N226_HexNAc(2)Hex(9)
P0C0L5_N226_HexNAc(2)Hex(10)
P0C0L5_N226_HexNAc(2)Hex(9)
P0DOX5_N299_HexNAc(3)Hex(3)
P0DOX5_N299_HexNAc(3)Hex(3)
P0DOX5_N299_HexNAc(3)Hex(3)Fuc(1)
P0DOX5_N299_HexNAc(3)Hex(3)Fuc(1)
P0DOX5_N299_HexNAc(3)Hex(4)Fuc(1)
P0DOX5_N299_HexNAc(3)Hex(4)Fuc(1)
P0DOX5_N299_HexNAc(4)Hex(3)
P0DOX5_N299_HexNAc(4)Hex(3)
P0DOX5_N299_HexNAc(4)Hex(3)Fuc(1)
P0DOX5_N299_HexNAc(4)Hex(3)Fuc(1)
P0DOX5_N299_HexNAc(4)Hex(4)
P0DOX5_N299_HexNAc(4)Hex(4)Fuc(1)
P0DOX5_N299_HexNAc(4)Hex(4)Fuc(1)
P0DOX5_N299_HexNAc(4)Hex(4)Fuc(1)NeuAc(1)
P0DOX5_N299_HexNAc(4)Hex(5)Fuc(1)
P0DOX5_N299_HexNAc(4)Hex(5)Fuc(1)
P0DOX5_N299_HexNAc(4)Hex(5)Fuc(1)NeuAc(1)
P0DOX5_N299_HexNAc(4)Hex(5)Fuc(1)NeuAc(1)
P0DOX5_N299_HexNAc(5)Hex(3)Fuc(1)
P0DOX5_N299_HexNAc(5)Hex(3)Fuc(1)
P0DOX5_N299_HexNAc(5)Hex(4)Fuc(1)
P0DOX5_N299_HexNAc(5)Hex(4)Fuc(1)
P0DOX5_N299_HexNAc(5)Hex(4)NeuGc(1)
P0DOX6_N332_HexNAc(4)Hex(5)Fuc(3)NeuAc(1)
P10253_N140_HexNAc(1)
P10253_N140_HexNAc(2)Hex(2)
P10253_N390_HexNAc(2)Hex(3)
P10253_N390_HexNAc(2)Hex(3)
P10253_N390_HexNAc(6)Hex(5)Fuc(2)
P10253_N390_HexNAc(6)Hex(5)Fuc(2)
P10253_N470_HexNAc(2)Hex(5)
P10253_N470_HexNAc(2)Hex(6)
P10253_N470_HexNAc(2)Hex(6)
P10253_N882_HexNAc(2)Hex(2)Fuc(1)
P10253_N882_HexNAc(2)Hex(2)Fuc(1)
P10253_N925_HexNAc(1)
P10253_N925_HexNAc(2)Hex(2)Fuc(1)
P10321_N110_HexNAc(2)Hex(10)
P10321_N110_HexNAc(2)Hex(5)
P10321_N110_HexNAc(2)Hex(6)
P10321_N110_HexNAc(2)Hex(6)
P10321_N110_HexNAc(2)Hex(7)
P10321_N110_HexNAc(2)Hex(8)
P10321_N110_HexNAc(2)Hex(9)
P10321_N110_HexNAc(2)Hex(9)
P10619_N333_HexNAc(2)Hex(6)
P10619_N333_HexNAc(2)Hex(6)
P10619_N333_HexNAc(2)Hex(7)
P10619_N333_HexNAc(2)Hex(7)
P10619_N333_HexNAc(2)Hex(9)
P10619_N333_HexNAc(5)Hex(6)
P10643_N202_HexNAc(2)Hex(5)
P10643_N202_HexNAc(2)Hex(5)
P10643_N202_HexNAc(2)Hex(5)
P10643_N202_HexNAc(2)Hex(7)
P10643_N202_HexNAc(2)Hex(9)
P10643_N754_HexNAc(2)Hex(7)
P10643_N754_HexNAc(2)Hex(8)
P10643_N754_HexNAc(2)Hex(9)
P10643_N754_HexNAc(4)Hex(5)Fuc(1)NeuAc(2)
P10909_N103_HexNAc(4)Hex(5)Fuc(1)NeuAc(2)
P10909_N103_HexNAc(4)Hex(5)NeuAc(2)
P10909_N103_HexNAc(4)Hex(5)NeuAc(2)
P10909_N103_HexNAc(5)Hex(6)Fuc(1)NeuAc(3)
P10909_N103_HexNAc(5)Hex(6)NeuAc(3)
P10909_N103_HexNAc(5)Hex(6)NeuAc(3)
P10909_N291_HexNAc(1)
P10909_N291_HexNAc(1)Fuc(1)
P10909_N291_HexNAc(2)Hex(10)
P10909_N291_HexNAc(2)Hex(5)
P10909_N291_HexNAc(2)Hex(6)
P10909_N291_HexNAc(2)Hex(8)
P10909_N291_HexNAc(2)Hex(9)
P10909_N291_HexNAc(3)Hex(4)Fuc(1)NeuAc(1)
P10909_N291_HexNAc(3)Hex(4)NeuAc(1)
P10909_N291_HexNAc(3)Hex(5)NeuGc(1)
P10909_N291_HexNAc(4)Hex(5)
P10909_N291_HexNAc(4)Hex(5)Fuc(1)
P10909_N291_HexNAc(4)Hex(5)Fuc(1)NeuAc(1)
P10909_N291_HexNAc(4)Hex(5)Fuc(1)NeuAc(1)
P10909_N291_HexNAc(4)Hex(5)Fuc(1)NeuAc(2)
P10909_N291_HexNAc(4)Hex(5)Fuc(2)
P10909_N291_HexNAc(4)Hex(5)Fuc(2)NeuAc(1)
P10909_N291_HexNAc(4)Hex(5)Fuc(2)NeuAc(1)
P10909_N291_HexNAc(4)Hex(5)NeuAc(1)
P10909_N291_HexNAc(4)Hex(5)NeuAc(2)
P10909_N291_HexNAc(5)Hex(3)Fuc(1)
P10909_N291_HexNAc(5)Hex(4)
P10909_N291_HexNAc(5)Hex(4)Fuc(1)
P10909_N291_HexNAc(5)Hex(4)Fuc(1)
P10909_N291_HexNAc(5)Hex(4)Fuc(1)NeuGc(2)
P10909_N291_HexNAc(5)Hex(5)
P10909_N291_HexNAc(5)Hex(5)Fuc(1)
P10909_N291_HexNAc(5)Hex(5)Fuc(1)NeuAc(1)
P10909_N291_HexNAc(5)Hex(5)NeuAc(1)
P10909_N291_HexNAc(5)Hex(6)Fuc(1)NeuAc(1)
P10909_N291_HexNAc(5)Hex(6)Fuc(1)NeuAc(1)
P10909_N291_HexNAc(5)Hex(6)Fuc(1)NeuAc(2)
P10909_N291_HexNAc(5)Hex(6)Fuc(1)NeuAc(3)
P10909_N291_HexNAc(5)Hex(6)Fuc(2)
P10909_N291_HexNAc(5)Hex(6)Fuc(2)NeuAc(1)
P10909_N291_HexNAc(5)Hex(6)NeuAc(1)
P10909_N291_HexNAc(5)Hex(6)NeuAc(2)
P10909_N291_HexNAc(5)Hex(6)NeuAc(3)
P10909_N291_HexNAc(6)Hex(7)Fuc(1)NeuAc(1)
P10909_N291_HexNAc(6)Hex(7)Fuc(1)NeuAc(2)
P10909_N291_HexNAc(6)Hex(7)Fuc(4)
P10909_N291_HexNAc(6)Hex(7)NeuAc(1)
P10909_N291_HexNAc(6)Hex(7)NeuAc(2)
P10909_N291_HexNAc(6)Hex(7)NeuAc(3)
P10909_N291_HexNAc(8)Hex(3)Fuc(1)
P10909_N374_HexNAc(1)
P10909_N374_HexNAc(1)Fuc(1)
P10909_N374_HexNAc(2)Hex(8)
P10909_N374_HexNAc(2)Hex(8)
P10909_N374_HexNAc(4)Hex(5)Fuc(1)NeuAc(2)
P10909_N374_HexNAc(4)Hex(5)Fuc(2)NeuAc(1)
P10909_N374_HexNAc(4)Hex(5)Fuc(4)
P10909_N374_HexNAc(4)Hex(5)NeuAc(2)
P10909_N374_HexNAc(5)Hex(6)Fuc(1)NeuAc(3)
P10909_N374_HexNAc(5)Hex(6)NeuAc(3)
P10909_N374_HexNAc(6)Hex(7)
P10909_N374_HexNAc(7)Hex(8)NeuAc(1)
P10909_N86_HexNAc(1)
P10909_N86_HexNAc(1)
P10909_N86_HexNAc(1)
P10909_N86_HexNAc(1)Fuc(1)
P10909_N86_HexNAc(1)Fuc(1)
P10909_N86_HexNAc(2)Hex(8)
P10909_N86_HexNAc(2)Hex(8)
P10909_N86_HexNAc(2)Hex(9)
P10909_N86_HexNAc(2)Hex(9)
P10909_N86_HexNAc(2)Hex(9)
P10909_N86_HexNAc(4)Hex(5)Fuc(1)NeuAc(2)
P10909_N86_HexNAc(4)Hex(5)Fuc(1)NeuAc(2)
P10909_N86_HexNAc(4)Hex(5)Fuc(2)NeuAc(1)
P10909_N86_HexNAc(4)Hex(5)NeuAc(2)
P10909_N86_HexNAc(4)Hex(5)NeuAc(2)
P10909_N86_HexNAc(5)Hex(6)Fuc(1)NeuAc(2)
P10909_N86_HexNAc(5)Hex(6)Fuc(1)NeuAc(3)
P10909_N86_HexNAc(5)Hex(6)NeuAc(3)
P10909_N86_HexNAc(5)Hex(6)NeuAc(3)
P10909_N86_HexNAc(5)Hex(6)NeuAc(3)
P11047_N1022_HexNAc(1)
P11047_N1022_HexNAc(2)Hex(5)
P11047_N1022_HexNAc(2)Hex(5)
P11047_N1022_HexNAc(4)Hex(5)
P11047_N1022_HexNAc(4)Hex(5)Fuc(1)NeuAc(1)
P11047_N1022_HexNAc(4)Hex(5)Fuc(2)
P11047_N1022_HexNAc(4)Hex(5)Fuc(2)NeuAc(1)
P11047_N1022_HexNAc(4)Hex(5)Fuc(3)
P11047_N1022_HexNAc(4)Hex(5)NeuAc(1)
P11047_N1022_HexNAc(4)Hex(5)NeuAc(2)
P11047_N1107_HexNAc(1)
P11047_N1107_HexNAc(2)Hex(5)
P11047_N1107_HexNAc(3)Hex(3)
P11047_N1107_HexNAc(3)Hex(3)Fuc(1)
P11047_N1107_HexNAc(3)Hex(4)
P11047_N1107_HexNAc(3)Hex(4)Fuc(1)
P11047_N1107_HexNAc(3)Hex(4)Fuc(1)
P11047_N1107_HexNAc(3)Hex(4)Fuc(1)NeuAc(1)
P11047_N1107_HexNAc(3)Hex(4)Fuc(2)
P11047_N1107_HexNAc(3)Hex(4)Fuc(2)
P11047_N1107_HexNAc(3)Hex(4)NeuAc(1)
P11047_N1107_HexNAc(3)Hex(6)Phospho(1)
P11047_N1107_HexNAc(4)Hex(4)
P11047_N1107_HexNAc(4)Hex(4)Fuc(1)
P11047_N1107_HexNAc(4)Hex(4)Fuc(1)NeuAc(1)
P11047_N1107_HexNAc(4)Hex(5)
P11047_N1107_HexNAc(4)Hex(5)Fuc(1)
P11047_N1107_HexNAc(4)Hex(5)Fuc(1)
P11047_N1107_HexNAc(4)Hex(5)Fuc(1)NeuAc(1)
P11047_N1107_HexNAc(4)Hex(5)Fuc(1)NeuAc(2)
P11047_N1107_HexNAc(4)Hex(5)Fuc(2)
P11047_N1107_HexNAc(4)Hex(5)Fuc(2)NeuAc(1)
P11047_N1107_HexNAc(4)Hex(5)Fuc(3)
P11047_N1107_HexNAc(4)Hex(5)NeuAc(1)
P11047_N1107_HexNAc(4)Hex(5)NeuAc(2)
P11047_N1107_HexNAc(4)Hex(7)
P11047_N1107_HexNAc(5)Hex(4)
P11047_N1107_HexNAc(5)Hex(4)Fuc(1)
P11047_N1107_HexNAc(5)Hex(4)Fuc(1)
P11047_N1107_HexNAc(5)Hex(6)Fuc(1)NeuAc(1)
P11047_N1107_HexNAc(5)Hex(6)Fuc(2)
P11047_N1107_HexNAc(5)Hex(6)NeuAc(1)
P11047_N1107_HexNAc(7)Hex(6)Fuc(1)NeuAc(4)
P11047_N1107_HexNAc(7)Hex(7)
P11047_N1205_HexNAc(1)
P11047_N1205_HexNAc(2)Hex(3)
P11047_N1205_HexNAc(2)Hex(5)
P11047_N1205_HexNAc(2)Hex(6)
P11047_N1205_HexNAc(2)Hex(6)
P11047_N1205_HexNAc(2)Hex(7)
P11047_N1205_HexNAc(3)Hex(3)
P11047_N1205_HexNAc(3)Hex(4)
P11047_N1205_HexNAc(3)Hex(4)
P11047_N1205_HexNAc(3)Hex(4)NeuAc(1)
P11047_N1205_HexNAc(3)Hex(5)
P11047_N1205_HexNAc(3)Hex(6)
P11047_N1205_HexNAc(3)Hex(6)NeuAc(1)
P11047_N1205_HexNAc(4)Hex(4)
P11047_N1205_HexNAc(4)Hex(5)
P11047_N1205_HexNAc(5)Hex(5)NeuAc(2)
P11047_N1205_HexNAc(5)Hex(6)
P11047_N1223_HexNAc(3)Hex(4)Fuc(1)NeuAc(1)
P11047_N1223_HexNAc(3)Hex(4)Fuc(1)NeuAc(1)
P11047_N1223_HexNAc(4)Hex(5)Fuc(1)
P11047_N1223_HexNAc(4)Hex(5)Fuc(1)
P11047_N1223_HexNAc(4)Hex(5)Fuc(1)NeuAc(1)
P11047_N1223_HexNAc(4)Hex(5)Fuc(1)NeuAc(1)
P11047_N1223_HexNAc(4)Hex(5)Fuc(1)NeuAc(2)
P11047_N1223_HexNAc(4)Hex(5)Fuc(1)NeuAc(2)
P11047_N1223_HexNAc(4)Hex(5)Fuc(2)NeuAc(1)
P11047_N1223_HexNAc(4)Hex(5)Fuc(3)
P11047_N1223_HexNAc(5)Hex(3)Fuc(1)
P11047_N1223_HexNAc(5)Hex(4)Fuc(1)
P11047_N1223_HexNAc(5)Hex(5)Fuc(1)
P11047_N1223_HexNAc(5)Hex(6)Fuc(1)
P11047_N1223_HexNAc(5)Hex(6)Fuc(1)NeuAc(1)
P11047_N1223_HexNAc(5)Hex(6)Fuc(1)NeuAc(2)
P11047_N1223_HexNAc(5)Hex(6)Fuc(1)NeuAc(3)
P11047_N1223_HexNAc(5)Hex(6)Fuc(2)NeuAc(1)
P11047_N1223_HexNAc(5)Hex(6)Fuc(3)NeuAc(1)
P11047_N1223_HexNAc(5)Hex(6)Fuc(3)NeuAc(1)
P11047_N1241_HexNAc(1)Fuc(1)
P11047_N1241_HexNAc(2)Hex(8)
P11047_N1241_HexNAc(3)Hex(4)Fuc(1)
P11047_N1241_HexNAc(3)Hex(4)Fuc(1)NeuAc(1)
P11047_N1241_HexNAc(3)Hex(4)Fuc(2)
P11047_N1241_HexNAc(4)Hex(3)Fuc(1)
P11047_N1241_HexNAc(4)Hex(3)NeuGc(1)
P11047_N1241_HexNAc(4)Hex(4)Fuc(1)
P11047_N1241_HexNAc(4)Hex(5)Fuc(1)
P11047_N1241_HexNAc(4)Hex(5)Fuc(1)NeuAc(1)
P11047_N1241_HexNAc(4)Hex(5)Fuc(1)NeuAc(2)
P11047_N1241_HexNAc(4)Hex(5)Fuc(2)
P11047_N1241_HexNAc(4)Hex(5)Fuc(2)NeuAc(1)
P11047_N1241_HexNAc(4)Hex(5)Fuc(3)
P11047_N1241_HexNAc(4)Hex(5)Fuc(3)NeuAc(1)
P11047_N1241_HexNAc(4)Hex(5)Fuc(4)
P11047_N1241_HexNAc(4)Hex(5)NeuAc(2)
P11047_N1241_HexNAc(5)Hex(3)Fuc(1)
P11047_N1241_HexNAc(5)Hex(4)Fuc(1)
P11047_N1241_HexNAc(5)Hex(5)Fuc(1)
P11047_N1241_HexNAc(5)Hex(6)Fuc(1)
P11047_N1241_HexNAc(5)Hex(6)Fuc(1)NeuAc(1)
P11047_N1380_HexNAc(4)Hex(4)Fuc(1)
P11047_N1380_HexNAc(4)Hex(5)Fuc(1)
P11047_N1380_HexNAc(4)Hex(5)Fuc(1)
P11047_N1380_HexNAc(4)Hex(5)Fuc(1)
P11047_N1380_HexNAc(4)Hex(5)Fuc(1)NeuAc(1)
P11047_N1380_HexNAc(4)Hex(5)Fuc(1)NeuAc(1)
P11047_N1380_HexNAc(4)Hex(5)Fuc(1)NeuAc(1)
P11047_N1380_HexNAc(4)Hex(5)Fuc(1)NeuAc(2)
P11047_N1380_HexNAc(4)Hex(5)Fuc(1)NeuAc(2)
P11047_N1380_HexNAc(4)Hex(5)Fuc(1)NeuAc(2)
P11047_N1380_HexNAc(4)Hex(5)Fuc(2)NeuAc(1)
P11047_N1380_HexNAc(4)Hex(5)Fuc(2)NeuAc(1)
P11047_N1380_HexNAc(4)Hex(5)NeuAc(2)
P11047_N1380_HexNAc(5)Hex(4)Fuc(1)
P11047_N1380_HexNAc(5)Hex(4)Fuc(1)
P11047_N1380_HexNAc(5)Hex(5)Fuc(1)
P11047_N1380_HexNAc(5)Hex(5)Fuc(1)
P11047_N1380_HexNAc(5)Hex(5)Fuc(1)NeuAc(1)
P11047_N1395_HexNAc(4)Hex(4)NeuGc(1)
P11047_N1395_HexNAc(4)Hex(5)Fuc(1)
P11047_N1395_HexNAc(4)Hex(5)Fuc(1)NeuAc(1)
P11047_N1395_HexNAc(4)Hex(5)Fuc(1)NeuAc(2)
P11047_N1395_HexNAc(4)Hex(5)Fuc(1)NeuAc(2)
P11047_N1395_HexNAc(4)Hex(5)Fuc(2)
P11047_N1395_HexNAc(4)Hex(5)Fuc(2)
P11047_N1395_HexNAc(4)Hex(5)Fuc(2)NeuAc(1)
P11047_N1395_HexNAc(4)Hex(5)Fuc(3)
P11047_N1395_HexNAc(4)Hex(5)Fuc(3)
P11047_N1395_HexNAc(4)Hex(5)Fuc(4)
P11047_N1395_HexNAc(4)Hex(5)NeuAc(1)
P11047_N1395_HexNAc(4)Hex(5)NeuAc(2)
P11047_N1395_HexNAc(5)Hex(3)Fuc(1)
P11047_N1395_HexNAc(5)Hex(4)Fuc(1)
P11047_N1395_HexNAc(5)Hex(4)Fuc(1)
P11047_N1395_HexNAc(5)Hex(4)Fuc(1)NeuAc(1)
P11047_N1395_HexNAc(5)Hex(4)NeuAc(1)NeuGc(1)
P11047_N1395_HexNAc(5)Hex(4)NeuGc(1)
P11047_N1395_HexNAc(5)Hex(5)Fuc(1)
P11047_N1395_HexNAc(5)Hex(5)Fuc(2)
P11047_N1395_HexNAc(5)Hex(5)Fuc(3)
P11047_N1395_HexNAc(6)Hex(6)Fuc(1)NeuAc(2)
P11047_N1395_HexNAc(7)Hex(8)NeuAc(1)
P11047_N1439_HexNAc(2)Hex(5)
P11047_N1439_HexNAc(3)Hex(4)
P11047_N1439_HexNAc(4)Hex(4)Fuc(1)
P11047_N1439_HexNAc(4)Hex(5)
P11047_N1439_HexNAc(4)Hex(5)Fuc(1)
P11047_N1439_HexNAc(4)Hex(5)Fuc(1)NeuAc(1)
P11047_N1439_HexNAc(4)Hex(5)Fuc(1)NeuAc(2)
P11047_N1439_HexNAc(4)Hex(5)NeuAc(1)
P11047_N1439_HexNAc(5)Hex(3)
P11047_N1439_HexNAc(5)Hex(3)Fuc(1)
P11047_N1439_HexNAc(5)Hex(4)
P11047_N1439_HexNAc(5)Hex(4)Fuc(1)
P11047_N1439_HexNAc(5)Hex(4)Fuc(1)NeuAc(1)
P11047_N1439_HexNAc(5)Hex(4)Fuc(2)
P11047_N1439_HexNAc(5)Hex(4)NeuAc(1)
P11047_N1439_HexNAc(5)Hex(5)Fuc(1)
P11047_N1439_HexNAc(5)Hex(5)Fuc(2)
P11047_N576_HexNAc(2)Hex(5)
P11047_N576_HexNAc(4)Hex(5)
P11047_N576_HexNAc(4)Hex(5)NeuAc(1)
P11047_N650_HexNAc(1)
P11047_N650_HexNAc(2)Hex(4)
P11047_N650_HexNAc(2)Hex(5)
P11047_N650_HexNAc(2)Hex(6)
P11047_N650_HexNAc(2)Hex(7)
P11047_N650_HexNAc(2)Hex(8)
P11047_N650_HexNAc(3)Hex(4)
P11047_N650_HexNAc(3)Hex(5)
P11047_N650_HexNAc(3)Hex(6)
P11117_N167_HexNAc(2)Hex(3)
P11117_N167_HexNAc(2)Hex(4)
P11117_N167_HexNAc(2)Hex(4)
P11117_N167_HexNAc(2)Hex(5)
P11117_N167_HexNAc(2)Hex(6)
P11117_N167_HexNAc(2)Hex(6)
P11117_N167_HexNAc(2)Hex(7)
P11117_N167_HexNAc(2)Hex(8)
P11117_N167_HexNAc(2)Hex(9)
P11117_N177_HexNAc(2)Hex(2)Fuc(1)
P11117_N267_HexNAc(2)Hex(7)
P11117_N267_HexNAc(2)Hex(7)
P11117_N267_HexNAc(2)Hex(8)
P11117_N267_HexNAc(2)Hex(9)
P11117_N267_HexNAc(2)Hex(9)
P11117_N331_HexNAc(2)Hex(5)
P11117_N331_HexNAc(2)Hex(6)
P11215_N1021_HexNAc(2)Hex(8)
P11215_N1021_HexNAc(2)Hex(9)
P11215_N1050_HexNAc(2)Hex(5)
P11215_N1050_HexNAc(2)Hex(9)
P11279_N103_HexNAc(2)Hex(4)
P11279_N103_HexNAc(2)Hex(5)
P11279_N103_HexNAc(2)Hex(6)
P11279_N103_HexNAc(2)Hex(7)
P11279_N103_HexNAc(2)Hex(8)
P11279_N103_HexNAc(2)Hex(9)
P11279_N103_HexNAc(3)Hex(5)
P11279_N103_HexNAc(3)Hex(5)NeuAc(1)
P11279_N103_HexNAc(3)Hex(6)
P11279_N103_HexNAc(3)Hex(6)NeuAc(1)
P11279_N103_HexNAc(4)Hex(6)NeuAc(1)
P11279_N103_HexNAc(5)Hex(4)NeuGc(1)
P11279_N103_HexNAc(6)Hex(4)Fuc(1)
P11279_N181_HexNAc(4)Hex(4)Fuc(1)
P11279_N181_HexNAc(4)Hex(5)Fuc(1)
P11279_N181_HexNAc(4)Hex(6)Fuc(1)
P11279_N249_HexNAc(2)Hex(2)Fuc(1)
P11279_N249_HexNAc(2)Hex(5)Fuc(1)
P11279_N249_HexNAc(3)Hex(4)Fuc(1)
P11279_N249_HexNAc(3)Hex(4)Fuc(1)NeuAc(1)
P11279_N249_HexNAc(3)Hex(4)Fuc(2)
P11279_N249_HexNAc(4)Hex(5)Fuc(1)NeuAc(1)
P11279_N249_HexNAc(4)Hex(5)Fuc(1)NeuAc(1)
P11279_N249_HexNAc(4)Hex(5)Fuc(1)NeuAc(2)
P11279_N249_HexNAc(4)Hex(5)Fuc(2)NeuAc(1)
P11279_N249_HexNAc(5)Hex(5)Fuc(1)
P11279_N249_HexNAc(5)Hex(6)Fuc(2)
P11279_N249_HexNAc(5)Hex(6)Fuc(3)
P11279_N249_HexNAc(6)Hex(7)
P11279_N261_HexNAc(1)
P11279_N261_HexNAc(1)Fuc(1)
P11279_N261_HexNAc(2)Hex(5)
P11279_N261_HexNAc(2)Hex(6)
P11279_N261_HexNAc(2)Hex(7)
P11279_N261_HexNAc(2)Hex(9)
P11279_N261_HexNAc(3)Hex(4)Fuc(1)
P11279_N261_HexNAc(3)Hex(4)Fuc(1)NeuAc(1)
P11279_N261_HexNAc(3)Hex(4)Fuc(2)
P11279_N261_HexNAc(3)Hex(5)Fuc(1)
P11279_N261_HexNAc(3)Hex(6)
P11279_N261_HexNAc(3)Hex(6)Fuc(1)
P11279_N261_HexNAc(4)Hex(5)Fuc(1)
P11279_N261_HexNAc(5)Hex(6)Fuc(1)
P11279_N261_HexNAc(5)Hex(6)Fuc(1)NeuAc(1)
P11279_N261_HexNAc(6)Hex(6)Fuc(1)NeuGc(3)
P11279_N261_HexNAc(6)Hex(7)Fuc(1)
P11279_N261_HexNAc(6)Hex(7)Fuc(1)NeuAc(1)
P11279_N261_HexNAc(6)Hex(7)Fuc(4)
P11279_N261_HexNAc(6)Hex(7)Fuc(5)
P11279_N322_HexNAc(1)
P11279_N322_HexNAc(2)Hex(10)
P11279_N322_HexNAc(2)Hex(5)
P11279_N322_HexNAc(2)Hex(6)
P11279_N322_HexNAc(2)Hex(7)
P11279_N322_HexNAc(2)Hex(8)
P11279_N322_HexNAc(2)Hex(9)
P11279_N76_HexNAc(4)Hex(5)Fuc(2)
P11279_N76_HexNAc(4)Hex(6)Fuc(1)
P11279_N76_HexNAc(4)Hex(6)Fuc(2)
P11279_N76_HexNAc(4)Hex(6)NeuAc(1)
P11279_N84_HexNAc(2)Hex(12)
P11279_N84_HexNAc(2)Hex(2)Fuc(1)
P11279_N84_HexNAc(3)Hex(4)Fuc(1)
P11279_N84_HexNAc(3)Hex(4)Fuc(1)NeuAc(1)
P11279_N84_HexNAc(3)Hex(4)Fuc(2)
P11279_N84_HexNAc(4)Hex(5)Fuc(1)
P11279_N84_HexNAc(4)Hex(5)Fuc(1)NeuAc(1)
P11279_N84_HexNAc(4)Hex(5)Fuc(1)NeuAc(2)
P11279_N84_HexNAc(4)Hex(5)Fuc(3)
P11279_N84_HexNAc(5)Hex(6)Fuc(1)NeuAc(3)
P11279_N84_HexNAc(6)Hex(7)Fuc(1)NeuAc(2)
P11532_N2899_HexNAc(2)Hex(9)
P11717_N1312_HexNAc(2)Hex(8)
P11717_N1312_HexNAc(2)Hex(8)
P11717_N1312_HexNAc(2)Hex(9)
P11717_N1312_HexNAc(2)Hex(9)
P11717_N400_HexNAc(2)Hex(5)
P11717_N400_HexNAc(2)Hex(6)
P11717_N400_HexNAc(2)Hex(8)
P11717_N400_HexNAc(2)Hex(9)
P11717_N581_HexNAc(2)Hex(6)
P11717_N581_HexNAc(2)Hex(7)
P11717_N581_HexNAc(2)Hex(8)
P12109_N212_HexNAc(1)Fuc(1)
P12109_N212_HexNAc(3)Hex(4)Fuc(1)
P12109_N212_HexNAc(3)Hex(4)Fuc(1)
P12109_N212_HexNAc(4)Hex(4)NeuGc(1)
P12109_N212_HexNAc(4)Hex(5)Fuc(1)
P12109_N212_HexNAc(4)Hex(5)Fuc(1)
P12109_N212_HexNAc(4)Hex(5)Fuc(1)NeuAc(1)
P12109_N212_HexNAc(4)Hex(5)Fuc(1)NeuAc(1)
P12109_N212_HexNAc(4)Hex(5)Fuc(1)NeuAc(2)
P12109_N212_HexNAc(4)Hex(5)Fuc(1)NeuAc(2)
P12109_N212_HexNAc(4)Hex(5)Fuc(3)
P12109_N212_HexNAc(4)Hex(5)Fuc(3)NeuAc(1)
P12109_N212_HexNAc(5)Hex(4)Fuc(1)
P12109_N212_HexNAc(5)Hex(4)Fuc(1)
P12109_N212_HexNAc(5)Hex(4)NeuGc(1)
P12109_N212_HexNAc(5)Hex(5)Fuc(1)
P12109_N212_HexNAc(5)Hex(5)Fuc(1)
P12109_N212_HexNAc(5)Hex(5)NeuGc(1)
P12109_N537_HexNAc(2)Hex(1)Fuc(1)
P12109_N537_HexNAc(4)Hex(5)Fuc(1)NeuAc(2)
P12109_N537_HexNAc(4)Hex(5)Fuc(3)
P12109_N804_HexNAc(1)
P12109_N804_HexNAc(2)Hex(2)
P12109_N804_HexNAc(2)Hex(3)
P12109_N804_HexNAc(2)Hex(4)
P12109_N804_HexNAc(2)Hex(4)Fuc(1)
P12109_N804_HexNAc(2)Hex(5)
P12109_N804_HexNAc(2)Hex(5)
P12109_N804_HexNAc(2)Hex(5)
P12109_N804_HexNAc(2)Hex(6)
P12109_N804_HexNAc(2)Hex(6)
P12109_N804_HexNAc(2)Hex(7)
P12109_N804_HexNAc(2)Hex(8)
P12109_N804_HexNAc(3)Hex(3)
P12109_N804_HexNAc(3)Hex(4)
P12109_N804_HexNAc(3)Hex(4)Fuc(1)NeuAc(1)
P12109_N804_HexNAc(3)Hex(4)Fuc(2)
P12109_N804_HexNAc(3)Hex(4)NeuAc(1)
P12109_N804_HexNAc(3)Hex(4)NeuAc(1)
P12109_N804_HexNAc(3)Hex(5)
P12109_N804_HexNAc(3)Hex(5)
P12109_N804_HexNAc(3)Hex(5)Fuc(1)
P12109_N804_HexNAc(3)Hex(5)NeuAc(1)
P12109_N804_HexNAc(3)Hex(5)NeuAc(1)
P12109_N804_HexNAc(3)Hex(6)
P12109_N804_HexNAc(3)Hex(6)
P12109_N804_HexNAc(3)Hex(6)NeuAc(1)
P12109_N804_HexNAc(3)Hex(6)NeuAc(1)
P12109_N804_HexNAc(3)Hex(6)NeuAc(1)
P12109_N804_HexNAc(4)Hex(3)Fuc(3)
P12109_N804_HexNAc(4)Hex(4)NeuAc(1)
P12109_N804_HexNAc(4)Hex(5)
P12109_N804_HexNAc(4)Hex(5)Fuc(1)
P12109_N804_HexNAc(4)Hex(5)Fuc(1)NeuAc(1)
P12109_N804_HexNAc(4)Hex(5)Fuc(1)NeuAc(1)
P12109_N804_HexNAc(4)Hex(5)Fuc(1)NeuAc(1)
P12109_N804_HexNAc(4)Hex(5)Fuc(1)NeuAc(2)
P12109_N804_HexNAc(4)Hex(5)Fuc(2)
P12109_N804_HexNAc(4)Hex(5)Fuc(3)
P12109_N804_HexNAc(4)Hex(5)NeuAc(1)
P12109_N804_HexNAc(4)Hex(5)NeuAc(1)
P12109_N804_HexNAc(4)Hex(5)NeuAc(2)
P12109_N804_HexNAc(4)Hex(6)Fuc(1)NeuAc(1)
P12109_N804_HexNAc(6)Hex(5)Fuc(1)NeuAc(1)
P12109_N896_HexNAc(4)Hex(4)Fuc(1)
P12109_N896_HexNAc(4)Hex(5)Fuc(1)
P12109_N896_HexNAc(4)Hex(5)Fuc(1)NeuAc(1)
P12109_N896_HexNAc(4)Hex(5)Fuc(1)NeuAc(1)
P12109_N896_HexNAc(4)Hex(5)Fuc(1)NeuAc(1)
P12109_N896_HexNAc(4)Hex(5)Fuc(1)NeuAc(1)
P12109_N896_HexNAc(4)Hex(6)
P12109_N896_HexNAc(4)Hex(6)NeuAc(1)
P12109_N896_HexNAc(4)Hex(6)NeuAc(1)
P12109_N896_HexNAc(7)Hex(3)Fuc(1)
P12110_N140_HexNAc(2)Hex(11)
P12110_N140_HexNAc(2)Hex(5)
P12110_N140_HexNAc(2)Hex(5)
P12110_N140_HexNAc(2)Hex(5)
P12110_N140_HexNAc(2)Hex(5)
P12110_N140_HexNAc(3)Hex(10)
P12110_N140_HexNAc(3)Hex(4)NeuAc(1)
P12110_N140_HexNAc(3)Hex(5)
P12110_N140_HexNAc(3)Hex(6)
P12110_N140_HexNAc(3)Hex(6)
P12110_N140_HexNAc(4)Hex(4)
P12110_N140_HexNAc(4)Hex(5)
P12110_N140_HexNAc(4)Hex(5)
P12110_N140_HexNAc(4)Hex(5)
P12110_N140_HexNAc(4)Hex(5)Fuc(1)
P12110_N140_HexNAc(4)Hex(5)Fuc(1)
P12110_N140_HexNAc(4)Hex(5)Fuc(1)NeuAc(1)
P12110_N140_HexNAc(4)Hex(5)Fuc(1)NeuAc(1)
P12110_N140_HexNAc(4)Hex(5)Fuc(1)NeuAc(1)
P12110_N140_HexNAc(4)Hex(5)Fuc(1)NeuAc(2)
P12110_N140_HexNAc(4)Hex(5)Fuc(2)
P12110_N140_HexNAc(4)Hex(5)Fuc(2)
P12110_N140_HexNAc(4)Hex(5)Fuc(2)
P12110_N140_HexNAc(4)Hex(5)Fuc(2)NeuAc(1)
P12110_N140_HexNAc(4)Hex(5)Fuc(3)
P12110_N140_HexNAc(4)Hex(5)Fuc(4)
P12110_N140_HexNAc(4)Hex(5)NeuAc(1)
P12110_N140_HexNAc(4)Hex(5)NeuAc(1)
P12110_N140_HexNAc(4)Hex(5)NeuAc(1)
P12110_N140_HexNAc(4)Hex(5)NeuAc(1)
P12110_N140_HexNAc(4)Hex(5)NeuAc(2)
P12110_N140_HexNAc(4)Hex(5)NeuAc(2)
P12110_N140_HexNAc(4)Hex(5)NeuAc(2)
P12110_N140_HexNAc(4)Hex(5)NeuAc(2)
P12110_N140_HexNAc(4)Hex(5)NeuAc(2)
P12110_N140_HexNAc(4)Hex(6)Fuc(1)NeuAc(1)
P12110_N140_HexNAc(5)Hex(4)
P12110_N140_HexNAc(5)Hex(4)Fuc(1)
P12110_N140_HexNAc(5)Hex(4)Fuc(2)
P12110_N140_HexNAc(5)Hex(4)NeuAc(1)
P12110_N140_HexNAc(5)Hex(4)NeuAc(1)
P12110_N140_HexNAc(5)Hex(5)
P12110_N140_HexNAc(5)Hex(5)
P12110_N140_HexNAc(5)Hex(5)
P12110_N140_HexNAc(5)Hex(5)Fuc(1)
P12110_N140_HexNAc(5)Hex(5)Fuc(2)
P12110_N140_HexNAc(5)Hex(5)Fuc(2)
P12110_N140_HexNAc(5)Hex(5)NeuAc(1)
P12110_N140_HexNAc(5)Hex(5)NeuAc(1)
P12110_N140_HexNAc(5)Hex(5)NeuAc(1)
P12110_N140_HexNAc(5)Hex(6)
P12110_N140_HexNAc(7)Hex(8)Fuc(1)NeuAc(2)
P12110_N327_HexNAc(2)Hex(5)
P12110_N327_HexNAc(3)Hex(6)
P12110_N327_HexNAc(4)Hex(5)Fuc(1)NeuAc(1)
P12110_N785_HexNAc(1)Fuc(1)
P12110_N785_HexNAc(3)Hex(3)Fuc(1)
P12110_N785_HexNAc(3)Hex(4)
P12110_N785_HexNAc(3)Hex(4)Fuc(1)
P12110_N785_HexNAc(3)Hex(4)Fuc(1)
P12110_N785_HexNAc(3)Hex(4)Fuc(1)NeuAc(1)
P12110_N785_HexNAc(3)Hex(4)Fuc(1)NeuAc(1)
P12110_N785_HexNAc(3)Hex(6)Phospho(2)
P12110_N785_HexNAc(4)Hex(4)Fuc(1)NeuAc(1)
P12110_N785_HexNAc(4)Hex(4)NeuGc(1)
P12110_N785_HexNAc(4)Hex(5)
P12110_N785_HexNAc(4)Hex(5)
P12110_N785_HexNAc(4)Hex(5)Fuc(1)
P12110_N785_HexNAc(4)Hex(5)Fuc(1)
P12110_N785_HexNAc(4)Hex(5)Fuc(1)NeuAc(1)
P12110_N785_HexNAc(4)Hex(5)Fuc(1)NeuAc(1)
P12110_N785_HexNAc(4)Hex(5)Fuc(1)NeuAc(2)
P12110_N785_HexNAc(4)Hex(5)Fuc(1)NeuAc(2)
P12110_N785_HexNAc(4)Hex(5)Fuc(2)
P12110_N785_HexNAc(4)Hex(5)Fuc(2)
P12110_N785_HexNAc(4)Hex(5)Fuc(3)
P12110_N785_HexNAc(4)Hex(5)Fuc(3)
P12110_N785_HexNAc(4)Hex(5)Fuc(3)NeuAc(1)
P12110_N785_HexNAc(4)Hex(5)NeuAc(1)
P12110_N785_HexNAc(4)Hex(5)NeuAc(1)
P12110_N785_HexNAc(4)Hex(5)NeuAc(2)
P12110_N785_HexNAc(4)Hex(5)NeuAc(2)
P12110_N785_HexNAc(5)Hex(3)Fuc(1)
P12110_N785_HexNAc(5)Hex(4)Fuc(1)
P12110_N785_HexNAc(5)Hex(4)Fuc(1)
P12110_N785_HexNAc(5)Hex(5)Fuc(1)
P12110_N785_HexNAc(5)Hex(5)Fuc(1)
P12110_N785_HexNAc(5)Hex(6)Fuc(1)NeuAc(1)
P12110_N785_HexNAc(5)Hex(9)Fuc(1)
P12110_N897_HexNAc(4)Hex(5)Fuc(1)NeuAc(1)
P12110_N954_HexNAc(2)Hex(12)
P12110_N954_HexNAc(2)Hex(12)
P12110_N954_HexNAc(3)Hex(4)Fuc(1)
P12110_N954_HexNAc(3)Hex(4)Fuc(1)NeuAc(1)
P12110_N954_HexNAc(4)Hex(5)
P12110_N954_HexNAc(4)Hex(5)Fuc(1)
P12110_N954_HexNAc(4)Hex(5)Fuc(1)
P12110_N954_HexNAc(4)Hex(5)Fuc(1)
P12110_N954_HexNAc(4)Hex(5)Fuc(1)
P12110_N954_HexNAc(4)Hex(5)Fuc(1)
P12110_N954_HexNAc(4)Hex(5)Fuc(1)NeuAc(1)
P12110_N954_HexNAc(4)Hex(5)Fuc(1)NeuAc(1)
P12110_N954_HexNAc(4)Hex(5)Fuc(1)NeuAc(2)
P12110_N954_HexNAc(4)Hex(5)Fuc(1)NeuAc(2)
P12110_N954_HexNAc(4)Hex(5)Fuc(1)NeuAc(2)
P12110_N954_HexNAc(4)Hex(5)Fuc(3)
P12110_N954_HexNAc(4)Hex(5)NeuAc(1)
P12111_N108_HexNAc(6)Hex(5)Fuc(1)NeuAc(1)
P12111_N2079_HexNAc(3)Hex(4)Fuc(1)
P12111_N2079_HexNAc(4)Hex(4)NeuGc(1)
P12111_N2079_HexNAc(4)Hex(5)
P12111_N2079_HexNAc(4)Hex(5)Fuc(1)
P12111_N2079_HexNAc(4)Hex(5)Fuc(1)
P12111_N2079_HexNAc(4)Hex(5)Fuc(1)NeuAc(1)
P12111_N2079_HexNAc(4)Hex(5)Fuc(1)NeuAc(1)
P12111_N2079_HexNAc(4)Hex(5)Fuc(1)NeuAc(1)
P12111_N2079_HexNAc(4)Hex(5)Fuc(1)NeuAc(1)
P12111_N2079_HexNAc(4)Hex(5)Fuc(1)NeuAc(1)NeuGc(1)
P12111_N2079_HexNAc(4)Hex(5)Fuc(3)
P12111_N2079_HexNAc(4)Hex(5)Fuc(3)
P12111_N2079_HexNAc(4)Hex(6)
P12111_N2079_HexNAc(4)Hex(6)
P12111_N2079_HexNAc(4)Hex(6)Fuc(2)
P12111_N2079_HexNAc(4)Hex(6)NeuAc(1)
P12111_N2079_HexNAc(5)Hex(4)NeuGc(1)
P12111_N2079_HexNAc(5)Hex(5)Fuc(1)
P12111_N2079_HexNAc(5)Hex(5)Fuc(1)
P12111_N2079_HexNAc(5)Hex(6)
P12111_N2331_HexNAc(4)Hex(4)NeuGc(1)
P12111_N2331_HexNAc(4)Hex(5)Fuc(1)
P12111_N2331_HexNAc(4)Hex(5)Fuc(1)NeuAc(1)
P12111_N2331_HexNAc(4)Hex(5)Fuc(3)
P12111_N2558_HexNAc(1)
P12111_N2558_HexNAc(1)Fuc(1)
P12111_N2558_HexNAc(1)Fuc(1)
P12111_N2558_HexNAc(11)Hex(11)NeuGc(1)
P12111_N2558_HexNAc(2)Hex(10)
P12111_N2558_HexNAc(2)Hex(10)
P12111_N2558_HexNAc(2)Hex(8)
P12111_N2558_HexNAc(2)Hex(9)
P12111_N2558_HexNAc(3)Hex(10)
P12111_N2558_HexNAc(3)Hex(3)Fuc(1)
P12111_N2558_HexNAc(3)Hex(4)Fuc(1)
[truncated: 3,760 more rows]

## Sheet: Phosphosites
Protein_Phosphosite
O00264_S181
O15173_S208
O15173_T211
O15551_Y214
O43324_Y22
O43852_S44
O60841_S214
O75064_Y927
O75400_S183
O75643_S1900
O76027_Y321
O94778_S21
O94826_S91
O94874_S458
O94875_S302
O94979_S799
P02452_S1012
P02452_S1125
P02452_S1193
P02452_S1199
P02452_S214
P02452_S291
P02452_S433
P02452_S441
P02452_S639
P02452_S673
P02452_S720
P02452_S889
P02452_S936
P02452_T337
P02452_T913
P02452_T948
P02452_Y165
P02461_S1039
P02461_S1174
P02461_S469
P02461_S934
P02461_T340
P02461_T632
P02461_T646
P02461_T721
P02462_S1433
P02462_S656
P02545_S277
P02545_S390
P02545_S392
P02545_S404
P02545_S407
P02671_S364
P02790_Y220
P02794_S179
P04792_S82
P05783_S23
P05783_S53
P05783_S60
P05787_S24
P05787_S43
P05787_S432
P05787_Y427
P05997_S1039
P05997_T236
P07477_S142
P07477_S149
P07477_S150
P07477_T147
P07477_Y154
P07477_Y229
P07478_S142
P07478_Y154
P07478_Y218
P07900_S231
P07910_S233
P07910_S299
P08123_S1104
P08123_S251
P08123_S291
P08123_S353
P08123_S776
P08123_S849
P08123_T1073
P08123_T209
P08123_T501
P08123_T756
P08123_T860
P08123_Y1108
P08138_S313
P08238_S255
P08559_S293
P08572_S1475
P08572_S376
P08572_T655
P08670_S56
P08727_S35
P08861_Y38
P09211_Y50
P09651_S6
P10412_S36
P12694_S337
P12931_S17
P13861_S99
P15336_S328
P15924_S2209
P16989_S38
P16989_S79
P17026_S49
P18206_S346
P19525_S520
P20908_T957
P21333_S2152
P23396_T221
P23588_S459
P23588_T450
P25189_S195
P25189_S233
P27824_S554
P27824_S564
P27824_S583
P29536_S119
P29692_S133
P29966_S101
P33240_S524
P35222_S552
P35555_S2702
P35579_S1943
P35606_S859
P35611_S358
P35611_T671
P35613_Y256
P39060_T1438
P39060_Y1395
P42167_T160
P49247_Y11
P49756_S677
P51608_S80
P51858_S165
P54727_S160
P55884_S85
P58107_S3783
P60468_S17
P60468_S19
P61224_T169
P62753_S236
P62995_T201
P67809_S174
P78347_S823
P83916_S89
P84103_S108
Q00839_S271
Q01082_S2102
Q03692_S354
Q04637_S1209
Q05519_S449
Q05707_T1676
Q05707_Y1758
Q06210_S261
Q07092_S1019
Q07092_S1199
Q07955_S199
Q09161_S7
Q13162_T255
Q13425_S110
Q13595_T202
Q13595_T204
Q14103_S83
Q14498_S136
Q14978_S538
Q14978_S563
Q15075_T197
Q15124_S122
Q15149_S4386
Q15424_S604
Q15651_S6
Q1KMD3_S228
Q32P44_S156
Q53EL6_S457
Q53EL6_S94
Q5SSJ5_T48
Q5SSJ5_T51
Q5T1M5_S956
Q6IN85_T60
Q6PKG0_S774
Q7KZF4_S426
Q8IU81_S453
Q8IX12_T667
Q8IYB3_S260
Q8IYB3_S414
Q8IYB3_S450
Q8IYB3_S597
Q8IYB3_S675
Q8IYB3_S696
Q8IYB3_S738
Q8IZP0_S183
Q8N5M1_Y40
Q8ND56_S216
Q8NE71_S228
Q8NHM4_Y218
Q8TAD8_S153
Q8WVV4_S123
Q8WWI1_S1593
Q92685_S13
Q96A26_T42
Q96KC8_Y113
Q99442_T158
Q9BQG0_S1267
Q9C0E8_Y262
Q9H1E3_S58
Q9H1E3_S75
Q9H1E3_S79
Q9H3Z4_S10
Q9HC35_S146
Q9HC78_S432
Q9HD40_T397
Q9NQC3_S107
Q9NYF8_S177
Q9NYF8_S268
Q9NYF8_S414
Q9NYF8_S496
Q9NYF8_S648
Q9P2E9_S1277
Q9P2E9_S135
Q9UHB6_S490
Q9UKM9_S135
Q9UKV3_S710
Q9UMS6_S902
Q9UNL2_S105
Q9UPN3_Y6379
Q9UQ35_S1083
Q9UQ35_S1085
Q9UQ35_S2011
Q9UQ35_S2407
Q9UQ35_S2581
Q9UQ35_S839
Q9UQ35_T1208
Q9UQ35_T2409
Q9UQ35_T2583
Q9UQB3_Y1019
Q9Y261_T301
Q9Y2W1_S289
Q9Y2W1_S310
Q9Y2W1_S672
Q9Y6R1_S257
